# Supplementary material for: Immune gene expression and functional networks in distinct lupus nephritis classes
Source: PubMed Central journal article supplement (PMC8788334; doi:10.1136/lupus-2021-000615), 2022-01-24
Supplement: lupus-2021-000615supp001.pdf [file lupus-2021-000615supp001.pdf]

| Gene     | Accession #    | Target Sequence (5'-3')                                                                               |
|----------|----------------|-------------------------------------------------------------------------------------------------------|
| APOL1    | NM_003661.3    | CCGCTTTGACCGGGATTACCAGCAGTACCATGGACTACGGAAAGAAGTGGTGACACAAGCCCAAGCCACGACCTGGTCATCAAAAGCCTTGACAAATT    |
| CD2AP    | NM_012120.2    | CTCATGAAGCCAGGACGATTTCAGAAACTGTTTTGGCTGGGCTACTTACCTATACCTTCTCTGGGAAATGTGAGTGAAACTGCATCTGGATCAGTTAC    |
| Col1a2   | NM_000089.3    | CCAATGGATTTGCTGGTCTGCTGGTGTCTGGTCAACCTGGTGTCAAAGGAGAAAGAGGAGCCAAAGGGCCTAAGGGTGAAAACGGTGTGTTGGTCC      |
| CTSB     | NM_147780.2    | ACAAAAACGGCCCGTGGAGGGAGCTTCTCTGTGTATTGGACTTCTGCTCTACAAGTCAGGAGTGACCAACACGTACCCGGAGAGATGATGGGTGG       |
| CTSC     | NM_001114173.1 | TGCTCGGTTATGGGACCACAAGAAAAAAGTAGTGGTGTACCTTCAGAAAGCTGGATACAGCATATGATGACCTTGCCAATTCTGGCCATTTACCATCA    |
| DKK1     | NM_012242.2    | CGGCACGGTTTTCTGGGGACCCAGGCTTGCAAAGTGACGGTCATTTTCTCTTTCTCCCTCTTGAGTCTTCTGAGATGATGGCTCTGGGCGCAGCG       |
| IFI30    | NM_006332.3    | CAGGAACAAAATGTCAGTGGCAGGTGGGAGTTCAAGTGCCAGCATGGAGAAGAGGAGTGCAAAATCAACAAGGTGGAGGCCTGCGTGTGGATGAACCTG   |
| Kat2B    | NM_003884.3    | CATCTGGAGGCACCATCTCAACGAAAGACTGCGATCTCCCAATGATGATATTTCTGGATACAAAGAGAACTACACAAGGTGGCTGTGTTACTGCAACGTGC |
| KLF2     | NM_016270.2    | GGAAAGTTGCGCGCTCAGACGAGCTCACGCGCCACTACCGAAAGCACACGGGCCACCGGCCATTCCAGTGCCATCTGTGCGATCGTGCCTTCTCGCGCTC  |
| KLF4     | NM_004235.4    | CGAGCATTTTCCAGTCCGACCACTCGCCTTACACATGAAGAGGCCATTTTAAATCCCAGACAGTGGATATGACCCACACTGCCAGAAGAGAATTCAGT    |
| MCL1     | NM_021960.3    | GCTGTAACCTCCTAGAGTTGCACCCTAGCAACCTAGCCAGAAAAGCAAGTGGCAAGAGGATTATGGCTAACAAAGATAAATACATGGGAAGAGTGCTCCC  |
| MMP7     | NM_002423.3    | GTGCCAGATGTTGAGAACTACTACTATTTCCAAATAGCCAAAATGGACTTCCAAAGTGGTACCTACAGGATCGTATCATATACTCGAGACTTACCGC     |
| Mx2      | NM_002463.1    | AATTTACGGCTCACTCAGGCGCAGCAGCACTCTGTCAATCTCCAGCAAAGAGATCCACTGAAGGGCGGCGATGCCTGTGGTTGTTTTCTTGTCGTA      |
| NPHS1    | NM_004646.3    | CCAGAGTAGAAAACAAGGTGCATCCTGGGGTTGGCTTTAGAAAATAAACTTCTCCAAAAGGACAGGGCAGATTGTAACGTCGTCTCAAAAATGAAATGCT  |
| NPHS2    | NM_014625.2    | CCTTCCAAACCTGTTGAGCCACTAAATCCTAAAAAGAAAGACTCTCCCATGTTATAGGAAGGATGGGGCATAATGTGACTGTAAAGGGGCCTGCCATAGA  |
| PLA1A    | NM_015900.2    | CAACCGAGTTTGGAAAAAGACCGGACTACCATTATTGGGAAGTTCTGCACTGCCCTTTTGCCTGTCAATGACAGAGAAAAGATGGTCTGTTACCTGAA    |
| PLAT     | NM_000931.2    | CAAGGTTACCAACTACCTAGACTGGATTCTGTGACAACATGCGACCGTGACCAGGAACACCCGACTCCTCAAAAGCAAATGAGATCCCGCCTCTTCTTT   |
| SERPINE1 | NM_000602.4    | CGGAGCACGGTCAAGCAAGTGGACTTTTCAGAGGTGGAGAGGCCAGATTTCATCATCAATGACTGGGTGAAGACACACAAAAGGTATGATCAGCAACT    |
| TAGAP    | NM_152133.2    | TGAACAGGATGGACTCCAGCAATCTGGCCATCTGCATTGGACCCAACATGCTCACCTGGAGAATGACCAGAGCCTGTCAATTTGAAGCCAGAAGGACCT   |
| TGFBR2   | NM_001024847.1 | ATTTGGAGAATGTTGAGTCTTCAAGCAGACCGATGTCTACTCCATGGCTCTGGTCTCTGGGAAATGACATCTCGTGTAATGCAAGTGGGAGAAGTAAA    |

Supplemental Table 1: Custom Probes used across both CodeSets
