# Supplementary material for: Immune gene expression and functional networks in distinct lupus nephritis classes
Source: PubMed Central journal article supplement (PMC8788334; doi:10.1136/lupus-2021-000615), 2022-01-24
Supplement: lupus-2021-000615supp002.pdf [file lupus-2021-000615supp002.pdf]

| Gene Name | Class III |            |                | Class IV |            |                | Class V |            |  |
|-----------|-----------|------------|----------------|----------|------------|----------------|---------|------------|--|
|           | FC        | BH p value | Percent change | FC       | BH p value | Percent change | FC      | BH p value |  |
| ISG15     | 3.42      | 6.38E-07   | 16.37          | 3.98     | 1.64E-11   | -27.78         | 2.47    | 0.000124   |  |
| MX1       | 2.97      | 3.99E-08   | 16.16          | 3.45     | 6.79E-13   | -34.01         | 1.96    | 9.79E-05   |  |
| C1QB      | 2.95      | 1.14E-07   | -4.41          | 2.82     | 1.88E-10   | -51.53         | 1.43    | 0.00391    |  |
| C1QA      | 2.70      | 1.94E-07   | -8.52          | 2.47     | 1.06E-09   | -48.52         | 1.39    | 0.00325    |  |
| CD163     | 2.65      | 4.47E-06   | 9.81           | 2.91     | 7.90E-10   | -42.26         | 1.53    | 0.00471    |  |
| IFI27     | 2.57      | 3.81E-08   | 12.45          | 2.89     | 6.79E-13   | -38.52         | 1.58    | 0.000124   |  |
| OAS3      | 2.53      | 1.61E-06   | 17.00          | 2.96     | 4.60E-11   | -36.36         | 1.61    | 0.00124    |  |
| STAT1     | 2.52      | 3.49E-08   | 8.73           | 2.74     | 6.79E-13   | -36.90         | 1.59    | 9.79E-05   |  |
| IFIT1     | 2.20      | 2.24E-05   | 11.82          | 2.46     | 5.54E-09   | -40.45         | 1.31    | 0.00843    |  |
| IFITM1    | 2.01      | 7.45E-08   | 11.44          | 2.24     | 2.89E-12   | -35.32         | 1.30    | 0.000124   |  |
| MX2       | 1.96      | 1.38E-05   | 36.22          | 2.67     | 3.29E-11   | -22.45         | 1.52    | 0.00056    |  |
| DDX58     | 1.95      | 7.78E-06   | 23.59          | 2.41     | 1.32E-10   | -30.77         | 1.35    | 0.00144    |  |
| CYBB      | 1.94      | 1.76E-07   | 10.31          | 2.14     | 1.41E-11   | -10.82         | 1.73    | 6.08E-06   |  |
| SIGLEC1   | 1.90      | 1.38E-05   | 26.32          | 2.40     | 1.88E-10   | -45.26         | 1.04    | 0.0122     |  |
| LCP1      | 1.90      | 0.000168   | 5.79           | 2.01     | 2.47E-07   | -41.58         | 1.11    | 0.0187     |  |
| CD53      | 1.89      | 2.26E-06   | 5.29           | 1.99     | 7.90E-10   | -21.16         | 1.49    | 0.000124   |  |
| BST2      | 1.81      | 6.01E-06   | -4.97          | 1.72     | 3.03E-08   | -39.78         | 1.09    | 0.00415    |  |
| PSMB9     | 1.66      | 4.87E-08   | 6.63           | 1.77     | 5.18E-12   | -37.95         | 1.03    | 0.000148   |  |
| CTSS      | 1.62      | 0.00227    | 16.67          | 1.89     | 2.29E-06   | -27.78         | 1.17    | 0.0191     |  |
| IFI35     | 1.47      | 0.00227    | 22.45          | 1.80     | 9.42E-07   | -19.73         | 1.18    | 0.0106     |  |
| HLA-A     | 1.47      | 2.82E-06   | 18.37          | 1.74     | 7.82E-11   | -44.08         | 0.82    | 0.00487    |  |
| IRF7      | 1.45      | 0.0106     | 73.10          | 2.51     | 2.24E-08   | -4.14          | 1.39    | 0.00983    |  |
| HLA-B     | 1.44      | 1.15E-05   | 2.78           | 1.48     | 1.34E-08   | -39.86         | 0.87    | 0.00544    |  |
| ITGB2     | 1.43      | 0.00209    | 0.70           | 1.44     | 1.84E-05   | -29.37         | 1.01    | 0.0201     |  |
| CEBPB     | 1.38      | 0.000498   | 15.22          | 1.59     | 2.47E-07   | -28.99         | 0.98    | 0.0106     |  |
| CD14      | 1.38      | 0.0019     | 18.12          | 1.63     | 1.15E-06   | -3.62          | 1.33    | 0.00239    |  |
| PSMB8     | 1.31      | 3.49E-08   | 9.92           | 1.44     | 6.79E-13   | -36.49         | 0.83    | 9.79E-05   |  |
| TAP2      | 1.29      | 0.00206    | 51.94          | 1.96     | 8.22E-09   | -31.09         | 0.89    | 0.0223     |  |
| FCGR2A    | 1.27      | 0.00344    | 11.02          | 1.41     | 9.80E-06   | -22.36         | 0.99    | 0.017      |  |
| IFI16     | 1.21      | 0.000378   | 40.50          | 1.70     | 1.79E-09   | -6.61          | 1.13    | 0.000715   |  |
| HLA-DMB   | 1.19      | 0.00254    | -7.56          | 1.10     | 8.83E-05   | -10.08         | 1.07    | 0.00517    |  |
| CCL2      | 1.18      | 0.0412     | 54.24          | 1.82     | 7.72E-06   | 21.19          | 1.43    | 0.00768    |  |
| PTPRC     | 1.13      | 0.0198     | 39.82          | 1.58     | 6.39E-06   | 0.00           | 1.13    | 0.0122     |  |
| C1S       | 1.09      | 0.00919    | 36.70          | 1.49     | 1.67E-06   | 35.78          | 1.48    | 0.000297   |  |
| IFIH1     | 1.07      | 0.0348     | 88.79          | 2.02     | 1.48E-07   | -13.93         | 0.92    | 0.0457     |  |
| TLR4      | 1.06      | 0.0248     | 17.92          | 1.25     | 0.000108   | -16.89         | 0.88    | 0.0408     |  |
| CD74      | 1.06      | 0.00221    | 24.53          | 1.32     | 5.79E-07   | -26.51         | 0.78    | 0.0167     |  |
| CCL5      | 1.03      | 0.0473     | 21.36          | 1.25     | 0.000269   | 10.68          | 1.14    | 0.0155     |  |
| ITGAL     | 0.98      | 0.00926    | -2.85          | 0.96     | 0.000254   | -26.25         | 0.73    | 0.039      |  |
| HLA-DPB1  | 0.96      | 0.0106     | -25.03         | 0.72     | 0.00388    | -15.16         | 0.82    | 0.0193     |  |
| HLA-E     | 0.96      | 6.13E-06   | -9.15          | 0.87     | 8.33E-08   | -50.00         | 0.48    | 0.0143     |  |
| C1R       | 0.93      | 0.00292    | 31.75          | 1.22     | 4.04E-07   | 29.59          | 1.20    | 0.000124   |  |
| F13A1     | 0.87      | 0.0375     | 78.37          | 1.55     | 4.94E-07   | 12.89          | 0.98    | 0.0106     |  |
| SERPING1  | 0.82      | 7.28E-05   | 29.27          | 1.06     | 9.22E-10   | -14.15         | 0.70    | 0.000558   |  |
| APOL1     | 0.80      | 0.000378   | 50.38          | 1.20     | 4.23E-10   | 24.19          | 0.99    | 4.52E-05   |  |
| HLA-DRA   | 0.78      | 0.0106     | 28.21          | 1.00     | 6.39E-06   | -11.28         | 0.69    | 0.0155     |  |
| STAT2     | 0.69      | 0.000378   | 49.93          | 1.03     | 5.01E-10   | -17.47         | 0.57    | 0.0029     |  |
| IFNGR1    | 0.68      | 0.0151     | 40.53          | 0.96     | 3.31E-06   | 1.17           | 0.69    | 0.00983    |  |
| TAPBP     | 0.63      | 0.0119     | 53.55          | 0.97     | 4.04E-07   | 8.37           | 0.69    | 0.00471    |  |
| NFKBIA    | 0.62      | 0.00191    | -18.61         | 0.50     | 0.00026    | -36.41         | 0.39    | 0.034      |  |
| IFITM2    | 0.45      | 0.0214     | 92.44          | 0.87     | 1.79E-08   | 64.67          | 0.74    | 0.000124   |  |
| JAK1      | 0.39      | 0.00824    | 21.12          | 0.48     | 9.17E-06   | -7.38          | 0.36    | 0.00988    |  |

**Supplemental Table 2: 52 Genes statistically significant in all lupus nephritis (LN) classes.** Fold change (FC) and Benjamini-Hochberg (BH) adjusted p values obtained for each LN class relative to thin basement membrane disease samples. Genes are ordered from highest to lowest FC based on values obtained from Class III LN. Percentage change (%) from Class III FC is shown for Class IV and V LN.
