# Supplementary material for: Immune gene expression and functional networks in distinct lupus nephritis classes
Source: PubMed Central journal article supplement (PMC8788334; doi:10.1136/lupus-2021-000615), 2022-01-24
Supplement: lupus-2021-000615supp004.pdf [file lupus-2021-000615supp004.pdf]

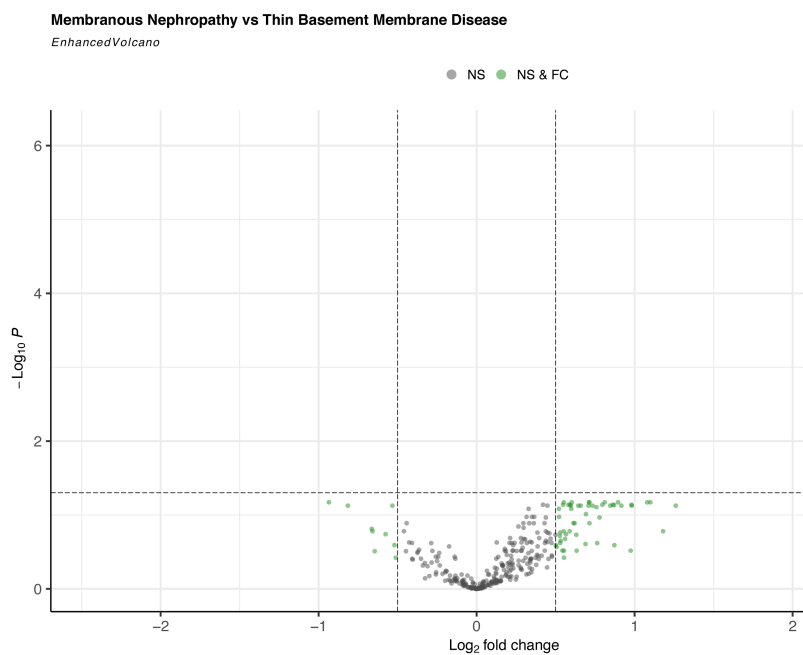

Supplemental Figure 2. **Differential Gene Expression analysis in Membranous Nephropathy (MN) versus Thin Basement Membrane (TBM) disease.** Volcano plot depicting differential gene expression of MN (n=9 biopsies) versus TBM (n=14 biopsies). Benjamini-Hochberg adjusted P value = 0.05 and  $\text{log}_2$  fold change (FC) cut-off = 0.5.
