# Supplementary material for: Immune gene expression and functional networks in distinct lupus nephritis classes
Source: Lupus Sci Med. 2022 Jan 24;9(1):e000615. doi: 10.1136/lupus-2021-000615 (PMC8788334; doi:10.1136/lupus-2021-000615)
Supplement: Supplementary data [file lupus-2021-000615supp006.xlsx]

## Sheet: S1_RNA Quality
STUDY_ID	260/280 RATIO	CONCENTRATION (ng/µl)	AGE OF BIOPSY AT RNA EXTRACTION [years]
21	1.98	94	0.616438
24	1.87	31.7	4.51507
26	2.03	93.6	5.88767
28	1.97	30.3	5.80548
29	2.05	103.6	5.29041
31	1.98	30.1	5.8411
32	2.04	49.3	4.33425
33	1.91	37.1	5.0274
34	2.06	62	5.63288
35	1.96	51.8	3.86849
36	1.85	21.1	5.03836
39	1.94	46.3	0.832877
41	2.01	36.4	4.71507
44	1.84	30.6	1.02466
47	1.9	33.8	4.5589
49	1.98	135.6	1.2
51	2	37.6	4.92603
52	2.03	33.8	3.64384
53	1.93	68.9	4.9863
56	1.91	46.6	3.65479
57	2.05	26.5	3.40822
58	1.94	21.2	3.03014
59	2	43.1	2.06301
60	2.05	64.3	4.44658
61	1.93	61.6	1.84384
62	1.99	46.9	5.05205
63	1.99	46.8	3.47397
64	2	45.3	2.70685
65	2.05	35.1	4.17534
67	1.91	13.5	3.8137
68	2.01	23	5.29315
71	1.93	83.5	2.51233
72	1.96	115.9	1.8411
74	1.9	29.4	2.71233
75	1.99	65.2	2.07123
76	2.06	39.7	3.06849
77	2.05	113.3	1.93151
78	1.7	21.7	8.44658
79	1.82	31.7	8.40822
83	1.81	27.9	11.5342
84	1.96	51	8.72329
86	1.92	56.3	4.87945
88	1.98	42.8	6.60548
89	1.83	23.5	7.16438
91	2.03	165.6	1.64932
107	1.85	22	2.90411
111	1.81	16.2	2.79452
119	1.91	32.8	8.16712
120	1.91	88	9.05205
121	2	52.5	9.40822
122	2.04	97.2	8.75342
123	2.01	81.6	7.70411
124	1.96	71.8	7.09315
125	2.06	142.8	2.0137
126	2.01	100.3	1.51781
127	1.9	65	1.23014
128	1.97	51.6	1.10411
129	1.98	129.4	2.30137
133	1.83	45.3	2.70137
137	1.88	69.1	1.08493
138	1.96	63.2	1.17534
139	1.77	13.2	1.00822
141	2	40.1	0.468493
144	1.8	31.5	7.93151
145	1.91	53.2	9.61918
146	1.92	29.6	8.83014
147	1.66	13.8	4.89041
150	1.83	29.5	8.99452
151	1.94	78	2.87397
158	1.83	16.8	6.55616
159	1.84	21.9	6.53151
160	1.77	12.5	4.56164
161	1.89	30	2.86575
164	1.84	30.7	0.419178
166	2	71.8	0.210959
168	2	60.2	1.26575
169	1.96	22.4	3.24384
175	1.93	54.4	0.641096

## Sheet: S2_Normalised_Counts
Gene ID	RNA21-TBM	RNA 24-LN3	RNA 26-LN4	RNA 28-LN5	RNA 29-LN5	RNA 31-LN3	RNA 32-LN3	RNA 33-LN4	RNA 34-LN4	RNA 35-LN5	RNA 36-LN5	RNA 39-TBM	RNA 41-LN4	RNA 44-LN3	RNA 47-MEM	RNA 49-LN4	RNA 51-TBM	RNA 52-TBM	RNA53-TBM	RNA 56-TBM	RNA 57-TBM	RNA 58-TBM	RNA 59-LN4	RNA 60-LN4	RNA 61-MEM	RNA 62-LN5	RNA63-TBM	RNA 64-TBM	RNA 65-LN3	RNA 67-LN3	RNA 68-LN3	RNA 71-LN4	RNA 72-LN4	RNA 74-LN5	RNA 75-LN5	RNA 76-LN5	RNA 77-LN5	RNA 78-LN4	RNA 79-LN3	RNA 83-LN4	RNA 84-LN4	RNA 86-LN4	RNA 88-LN4	RNA 89-LN4	RNA 91-LN4	RNA 107-LN5	RNA 111-LN5	RNA 119-LN3	RNA 120-LN4
A2M	4992.94	7426.85	8311.65	6120.44	8431.9	5418.36	7578.81	10076	10510	13821.8	8796.97	4492.13	11275.1	6895.48	7453.14	12424.8	4753.15	5408.23	5905.83	10808.8	9625.6	5727.17	8477.22	9890.93	7514.52	3318.79	3314.1	5244.5	11278.3	7612.06	5578.65	14270.9	9801.49	15706.3	13528.7	11851.7	9647.7	8764.35	7996.92	6916.53	6704.79	6012.44	10355.6	8693.82	8274.51	8339.06	4397.83	5526.96	5240.18
ABCB1	958.23	505.09	1022.89	906.59	747.88	864.83	806.41	609.9	828.81	776.98	697.07	1291.25	972.86	895.52	947.93	928.74	1162.68	1032.8	656.74	1549.21	920.09	910.17	894.01	855.28	781.8	1406.62	678.38	1037.02	372.38	773.02	908.43	750.6	1309.88	686.98	685.78	796.21	1382.63	694.76	812.9	957.67	809.6	1319.43	1066.18	832.94	1004.97	1104.14	1343.68	1288.96	785.39
ABL1	354.89	331.67	355.62	361.6	354.47	347.58	404.88	331.44	425.1	375.02	301.15	322.54	389.05	381.14	324.42	357.56	362.45	323.77	360.43	100	100	100	316.78	337.6	249.21	305.9	365.56	272.15	265.99	100	332.73	304.97	347.46	297.82	306.92	372.64	337.32	100	274.35	325.36	286.71	298.38	356.59	100	290.61	426.68	100	344.61	100
ADA	100	100	100	100	100	100	100	100	100	100	100	100	100	100	100	100	100	100	100	100	100	100	100	100	100	100	100	100	100	100	100	100	100	100	100	100	100	100	100	100	100	100	100	100	100	100	100	100	100
ADORA2A	100	100	100	100	100	100	100	100	100	100	100	100	100	100	100	100	100	100	100	100	100	100	100	100	100	100	100	100	100	100	100	100	100	100	100	100	100	100	100	100	100	100	100	100	100	100	100	100	100
AICDA	100	100	100	100	100	100	100	100	100	100	100	100	100	100	100	100	100	100	100	100	100	100	100	100	100	100	100	100	100	100	100	100	100	100	100	100	100	100	100	100	100	100	100	100	100	100	100	100	100
AIRE	100	100	100	100	100	100	100	100	100	100	100	100	100	100	100	100	100	100	100	100	100	100	100	100	100	100	100	100	100	100	100	100	100	100	100	100	100	100	100	100	100	100	100	100	100	100	100	100	100
AKT3	548.13	710.7	558.95	588.7	637.25	532.89	541.53	319.77	546.27	711.9	661.39	718.78	469.25	433.94	487.02	451.67	585.71	607.4	534.88	753.3	706.58	722.94	608.28	444.91	777.78	555.48	575.99	482.45	659.88	584.28	716.89	590.2	535.62	828.48	707.3	737.23	772.88	627.88	630	607.75	705.03	588.14	796.03	609.83	677.14	684.94	546.45	632.88	486.5
ALCAM	205.7	169.01	196.03	100	100	231.8	171.04	256.64	250.1	140.93	155.53	280.89	179.06	100	159.35	263.14	247.12	128.97	132.29	100	100	100	195.56	308.33	100	264.94	168.96	219.7	199.35	100	232.03	266.4	284.19	100	208.54	213.24	328.95	100	274.35	263.97	292.59	336.32	289.96	100	442.36	100	100	100	100
AMBP	100	100	100	100	100	100	100	144.67	100	100	100	100	100	100	100	100	100	100	100	100	100	100	103.23	100	100	100	100	100	100	100	100	100	100	100	100	100	177.86	100	100	100	133.95	100	100	100	100	100	100	100	100
AMICA1	100	100	100	100	100	100	100	100	130.2	100	320.6	100	163.6	100	100	100	100	100	100	100	206.04	100	134.57	100	369.8	144.63	100	100	178.41	100	204.67	144.05	188.5	100	148.89	100	201.52	471.84	281.98	100	292.59	100	360.2	100	362.19	400.48	100	100	100
ANP32B	827.62	916.1	783.59	727.41	732.15	872.32	731.21	803.05	881.92	822.88	857.78	651.5	691.51	821.86	757.28	872.94	1090.57	692.11	667.97	999.59	800.68	767.34	832.55	771.6	570.77	543.96	717.3	710.96	828.24	612.31	510.04	938.66	942.64	903.43	859.36	899.28	977.98	579.58	548.71	564.78	573.42	548.47	642.95	516.87	678.57	527.74	501.54	480.46	435.62
ANXA1	604.24	704.24	563.26	554.84	467.02	507.09	480.56	1467.28	992.4	1033.46	1012.96	662.18	787.42	733.71	593.05	949.16	505.75	335.99	382.52	1062.61	998.38	735.33	1119.07	1031.5	1195.81	656.59	264.7	335	821.15	486.34	769.43	992.26	782.03	644.15	814.22	785.85	959.01	1396.95	955.16	714.16	1339.55	876.17	1927.05	777.16	1809.51	1830.25	655	970.86	1548.52
APOE	15306.1	1862.61	16656.1	11628.1	8379.73	11880.2	7819.55	10367.7	14522.2	8526.34	6487.25	11700.2	12172	15111.7	10502.5	15404	10990.2	6790.22	5937.34	16530.7	9395.34	13345.6	7392.7	12469.6	1672.13	17588.5	4045.22	11614.6	6829.5	9595.69	7509.34	8009.02	9009.33	2820.23	4148.41	3223.37	10923.7	15061.8	14192.8	10683.8	10985.5	17475.1	6135.93	5875.21	4389.21	22445.8	32005	19685.6	14531.3
APOL1	486.28	1232.63	1030.52	818.59	673.03	568.46	919.13	1798.98	805.28	1012.98	865.03	496.63	1016.83	688.49	384.99	1203.26	433.03	369.61	486.76	757.25	693.98	528.86	1085.19	1007.09	739.59	662.99	340.98	432.16	744.41	838.17	950.02	1054.99	961.13	838.04	851.77	893.08	1777.9	1181.46	1054.23	875.82	1019.94	803.73	988.74	1610.1	1644.88	1253.85	931.97	891.34	1573.96
APP	3897.96	6374.75	4842.55	5989.41	5863.49	4013.73	5593.96	4146.18	4439.2	6076.31	5304.96	6995.58	5643.36	4056.05	5579.29	5550.98	4449.25	5095.66	5308.56	6464	6604.38	5241.92	5983	5249.83	8595.77	6884.61	5110.67	4658.4	4126.57	6067.05	7104.37	5573.61	5083.17	7799.69	6694.35	6583.58	7766.92	5758.69	6274.59	5797.2	4999.81	7516.42	6933.76	9534.2	8625.25	6680.98	6097.08	5974.28	5278.34
ARG1	100	100	100	100	100	100	100	100	100	100	100	100	100	100	100	100	100	100	100	100	100	100	100	100	100	100	100	100	100	100	100	100	100	100	100	100	100	100	100	100	100	100	100	100	100	100	100	100	100
ARG2	100	460.81	192.63	213.21	196.53	100	171.57	279.07	384.97	130.49	100	205.06	181.88	303.2	247.57	196.7	214.96	153.24	199.53	100	100	100	204.16	186.71	257.25	276.46	139.77	337.32	197.66	310.43	330.54	308.94	402.31	245.64	230.03	100	309.09	100	100	100	198.58	100	100	100	100	100	100	100	100
ATF1	168.84	156.51	141.49	207.85	175.28	183.57	181.37	153.28	184.34	161.51	151.29	176.22	174.19	100	142.61	166.24	199.27	147.82	180.85	100	100	100	154.87	100	100	147.19	150.52	100	100	100	152.13	100	100	100	100	100	192.4	100	100	100	139.83	186.27	100	100	174.65	100	100	100	100
ATF2	371.93	381.6	340.23	304.12	354.47	392.66	438.05	327.88	362.21	403.49	422.53	474.2	350.83	100	325.16	398.13	446.06	291.76	322.13	100	286.5	376.61	388.39	410.67	450.19	430.05	387.57	297.69	388.23	414.82	505.66	310.2	405.68	366.59	417.34	418.34	525.85	393.82	365.81	433.82	468.84	412.21	516.88	416.47	541.14	100	396.74	430.76	473.78
ATG10	100	100	100	100	100	100	100	100	100	100	100	100	100	100	100	100	100	100	100	100	100	100	100	100	100	100	100	100	100	100	100	100	100	100	100	100	100	100	100	100	100	100	100	100	100	100	100	100	100
ATG12	100	100	100	100	100	100	100	100	100	100	100	100	100	100	100	100	100	100	100	100	100	100	100	100	100	100	100	100	100	100	100	100	100	100	100	100	100	100	100	100	100	100	100	100	100	100	100	100	100
ATG16L1	100	121.73	140.31	100	170.56	100	100	143.79	100	135.91	143.31	133.5	129.75	100	119.12	171.76	100	143.06	120.6	100	100	100	100	162.18	100	140.79	136.7	100	100	100	130.25	100	100	100	100	100	100	100	100	100	199.76	172.47	100	100	163.2	100	100	100	100
ATG5	100	206.77	164.06	100	100	100	166.18	220.51	100	159.31	100	180.5	184.74	100	134.72	213.79	135.56	147.85	148.78	100	100	100	156.28	100	299.46	171.51	181.76	100	100	100	200.29	100	262.42	100	170.93	100	235.03	100	100	100	223.26	100	208.91	100	241.94	100	100	100	100
ATG7	264.53	287.04	255.89	241.07	280.19	310.56	246.39	373.98	361.24	273.21	298.25	221.08	287.81	100	244.54	232.08	189.39	258.76	258.84	100	100	100	262.9	234.76	291.42	262.38	200.19	100	334.66	100	271.43	260.11	347.16	263.7	355.43	272.63	255.91	375.24	350.56	306.95	326.66	298.38	389.01	100	352.17	100	100	100	413.36
ATM	100	100	100	100	100	100	100	100	100	100	100	100	100	100	100	100	100	100	100	100	100	100	100	100	100	100	100	100	100	100	100	100	100	100	100	100	100	100	100	100	100	100	100	100	100	100	100	100	100
AXL	273.73	448.47	389.48	364.71	363.49	100	386.2	682.25	537.37	482.47	564.35	230.69	501.72	100	266.07	340.7	260.2	218.89	290.58	100	585.05	100	458.77	585.05	295.44	221.42	203.26	100	485.64	100	321.78	575.01	100	474.09	408.94	419.38	479.14	568.44	315	333.55	505.27	363.92	504.27	401.6	515.37	497.8	100	351.23	702.72
BAGE	100	100	100	100	100	100	100	100	100	100	100	100	100	100	100	100	100	100	100	100	100	100	100	100	100	100	100	100	100	100	100	100	100	100	100	100	100	100	100	100	100	100	100	100	100	100	100	100	100
BATF	100	100	100	100	100	100	100	100	100	100	100	100	100	100	100	100	100	100	100	100	100	100	100	100	100	100	100	100	100	100	100	100	100	100	100	100	100	100	100	100	100	100	100	100	100	100	100	100	100
BAX	308.98	304.14	557.99	372.29	266.01	253.5	402.72	651.31	522.64	405.9	306.33	280.89	542.76	651.53	418.13	479.36	258.66	348.03	323.27	100	535.58	100	409.58	498.39	313.52	407.01	335.35	341.73	532.42	388.44	475.01	656.34	621.13	319.98	339.91	361.85	569.59	442.12	398.83	515.67	589.87	355.3	796.03	416.47	592.67	643.77	422.94	563.3	540.55
BCL10	424.82	439.93	401.02	399.14	434.51	389.48	395.5	543.13	504.4	423.78	388.82	428.28	461.59	584.25	392.74	407.88	355.68	366.57	327.13	634.34	375.55	490.86	465.65	462.24	436.12	362.21	344.06	384.96	459.08	411.08	398.4	461.11	461.42	399.94	434.01	389.41	485.77	575.87	525.85	527.95	458.27	429.46	549.3	513.15	482.44	651.26	583.88	487.09	546.91
BCL2	253.53	202.12	322.11	323.91	298.65	339.41	337.61	281.51	356.52	363.18	360.62	160.2	383.09	100	283.86	200.18	186.15	314.45	392.73	100	345.51	408.25	326.71	324	100	232.94	309.24	286.4	289.12	100	295.51	280.46	100	289.22	264.37	362.47	258.32	100	100	448.14	305.51	265.61	567.31	100	254.82	100	100	100	100
BCL2L1	1816.48	1384.68	1584.25	1482.15	1366.43	1712.18	1282.16	1526.81	1430.62	1394.2	1044.2	1688.55	1173.17	1544.99	1165.64	1571.01	2045.11	1408.29	1308.58	1295.95	1143.99	1613.8	1050.42	1252.25	1165.66	1702.27	1285.09	1304.42	1196.4	1233.06	1527.92	1289.93	1162.23	913.33	1128.32	1126.91	1244.51	1898.51	1867.13	1821.22	1552.23	1843.75	1575.85	1297.75	1642.02	1470.94	1822.76	1726.35	1901.47
BCL6	100	570.89	201.13	100	178.52	100	100	235.74	167.56	213.43	308.15	151.66	165.56	100	270.95	104.07	100	164.27	144.22	100	277.85	100	237.68	266.96	229.11	159.99	139.26	100	215.85	311.11	319.59	273.59	241.96	255.4	284.73	193.66	211.64	100	100	372.43	279.66	100	569.11	100	365.05	100	100	100	594.61
BID	100	100	100	100	100	100	100	100	100	100	100	100	100	100	100	100	100	100	100	100	100	100	100	100	100	100	100	100	100	100	100	100	100	100	100	100	100	100	100	100	100	100	100	100	100	100	100	100	100
BIRC5	100	100	100	100	100	100	100	100	100	100	100	100	100	100	100	100	100	100	100	100	100	100	100	100	100	100	100	100	100	100	100	100	100	100	100	100	100	100	100	100	100	100	100	100	100	100	100	100	100
BLK	100	100	100	100	100	100	100	100	100	100	100	100	100	100	100	100	100	100	100	100	100	100	100	100	100	100	100	100	100	100	100	100	100	100	100	100	100	100	100	100	100	100	100	100	100	100	100	100	100
BLNK	100	100	169.44	100	100	100	217.22	211.85	100	146.96	207.04	100	192.97	100	138.58	159.26	100	100	100	100	100	100	100	100	100	100	132.09	100	100	100	135.72	100	100	100	100	100	100	100	100	100	100	100	100	100	100	100	100	100	100
BMI1	225.46	314.37	194.96	216.79	235.58	232.08	222.45	179.56	225.37	305.51	267.57	239.24	237.05	100	212.03	322.88	306.44	204.59	217.83	100	100	100	258.97	232.81	249.21	151.03	211.45	100	232.53	100	159.8	257.88	100	272.63	239.44	237.57	250.6	100	100	100	131.6	177.65	100	100	226.19	100	100	100	100
BST1	215.97	100	248.31	214.2	155.29	292.47	167.47	228.66	100	210.1	100	288.37	182.89	100	226.31	332.41	301.05	137.4	136.47	100	100	100	269.8	258.34	100	366.05	123.9	244.58	100	100	121.49	100	100	100	100	100	280.07	100	327.7	235.33	249.11	244.91	100	100	167.49	426.68	100	334.67	100
BST2	489.24	2090.75	1105.99	1161.21	980.97	512.71	2406.84	2166.99	564.06	1257.73	1035.64	372.74	1409.41	1844.24	252.47	2233.51	304.95	229.15	505.68	100	565.29	634.85	1094.75	1961	263.28	519.64	305.66	524.69	1036.93	1436.17	811.02	662.1	930.83	1110.16	586.55	681.71	671.58	1422.95	698.59	939.26	1366.57	841.67	522.28	1877.84	1256.92	1572	1223.91	1295.59	1424.52
BTK	100	100	100	100	100	100	100	100	100	100	100	100	100	100	100	100	100	100	100	100	100	100	100	100	100	100	100	100	100	100	100	100	100	100	100	100	100	100	100	100	100	100	100	100	100	100	100	100	100
BTLA	100	100	100	100	100	100	100	100	100	100	100	100	100	100	100	100	100	100	100	100	100	100	100	100	100	100	100	100	100	100	100	100	100	100	100	100	100	100	100	100	100	100	100	100	100	100	100	100	100
C1QA	190.94	453.8	914.84	407.66	100	254.45	1152.43	3180.82	643.67	570.37	782.19	106.8	1241.72	840.77	202.22	504.36	100	195.59	191.9	100	623.35	100	594	1499.95	217.05	407.01	119.29	100	1786.51	1383.48	1332	932.25	764.82	616.69	428.95	266.06	592.13	1400.66	1132.98	972	1272.57	486.38	709.58	885	1142.4	1429.77	100	1129.91	3125.67
C1QB	139.39	538.13	1042.68	317.83	140.94	159.21	1088.57	4314.02	526.43	479.21	538.07	165.54	1020.57	1101.69	138.84	603.22	100	129.66	164.61	100	421.41	100	627.02	1703.39	359.75	492.76	100	100	1669.02	1424.09	2057.65	895.53	793.53	664.01	485.48	218.72	749.23	1605	1440.36	1219.6	1888.29	562.27	1062.58	1193.63	2098.69	1706.74	396.74	1332.04	6114.6
C1QBP	769.22	691.25	840.49	790.2	713.73	882.44	806.01	794.66	934.38	746.56	665.21	1150.27	827.21	1432.16	943.91	1096.27	1229.54	850.18	774.71	1022.77	866.66	894.62	684.4	918.14	649.15	1080.24	816.62	1230.61	607.37	927.87	781.47	952.61	928.25	651.46	795.69	721.82	1213.64	720.77	685.89	796.01	647.45	805.45	862.67	713.95	846.06	1006.83	1253.85	901.28	909.4
C1R	1090.3	3442.96	2264.42	1655.72	1149.49	1431.05	2351.05	2204.06	2932.87	3233.04	2895.33	1085.12	2594.05	1264.16	1171.89	2039.05	888.9	947.65	1039.13	1627.09	2555.28	1292.27	2454.29	2544.34	2317.26	1533.33	531.96	595.11	2366.09	2971.21	2634.45	3970.38	1669.99	2493.14	3735.7	2535.34	2732.41	3340.04	2014.47	1768.01	3077.44	1707.49	3587.55	3275.99	4427.87	2837.08	1298.76	2153.79	3011.2
C1S	584.09	1758.37	1338.96	790.07	683.95	830.3	1023.3	1866.9	1791.94	1784.94	2026.79	424.01	1508.16	1050.82	589.76	1728.1	644.32	444.6	431.65	857.98	1391.94	621.26	1553.29	1390.66	1123.46	659.15	217.08	100	1562.83	1504.85	963.16	2091.03	1011.61	1196.39	1959.53	1436.09	1542.41	1497.26	871.33	910.61	1495.83	741.64	1631.69	985.4	2685.64	1586.97	632.54	984.12	1217.83
C2	100	100	100	100	100	100	100	215.84	100	100	100	100	104.62	100	100	100	100	100	100	100	100	100	100	110.48	100	100	100	100	100	100	100	104.49	100	100	100	100	252.82	100	100	100	263.21	100	452.05	100	334.99	419.2	100	100	100
C3	100	100	144.92	100	100	100	100	382.11	398.17	100	385.67	100	588.52	100	155.15	326.95	100	100	100	100	354.48	100	402.6	426.81	100	139.51	100	100	260.8	100	117.11	760.93	100	100	100	100	1557.5	100	100	100	446.52	100	1795.57	100	1351.41	100	100	100	368.85
C3AR1	100	179.04	143.6	100	100	100	100	438.35	100	100	100	100	187.42	100	100	147.4	100	100	100	100	100	100	100	283.74	100	100	100	100	212.8	100	166.36	100	100	100	100	100	100	100	100	100	267.91	100	100	100	313.52	100	100	100	531.01
C4B	5112.23	1477.5	6831.01	2224.72	1587.53	2192.52	2539.89	4513.15	2690.81	1682.35	2437.08	1747.29	5291.79	4953.01	3034.62	6049.43	1400.42	2446.57	869.75	9719.86	3727.04	6014.97	3138.77	6018.32	466.27	3407.11	1352.16	3224.35	1138.7	5718.91	2769.07	2916.02	2945.26	1038.29	1436.83	959.96	8518.12	3358.62	2169.43	3096.07	3465.2	3704.74	4754.58	2606.66	3266.86	5936.16	2627.47	6756.27	9520.08
C4BPA	100	100	100	100	100	100	100	100	100	100	100	100	100	100	100	100	100	100	100	100	100	100	100	100	100	100	100	100	100	100	100	100	100	100	100	100	100	100	100	100	100	100	100	100	100	100	100	100	100
C5	100	100	100	100	100	100	100	100	100	100	100	100	100	100	100	100	100	100	100	100	100	100	100	100	100	100	100	100	100	100	100	100	100	100	100	100	100	100	100	100	100	100	100	100	100	100	100	100	100
C6	100	100	100	100	100	100	100	100	100	100	100	100	100	100	100	100	100	100	100	100	100	100	100	100	100	100	100	100	100	100	100	100	100	100	100	100	100	100	100	100	139.83	100	100	100	100	100	100	100	100
C7	8029.69	7053.64	6641.57	6289.84	9899.58	7402.06	4337.12	7223.71	8537.19	9523.38	9554.97	5299.55	6256.58	4731.44	5037.72	5813.48	5603.1	4913.88	4529.91	5221.2	7273.98	5232.22	4512.05	4855.42	6340.81	3806.44	3949.99	3637.54	7448.94	6026.84	6657.82	6779.67	3884.41	6066.2	9105.16	5497.65	3522.99	10328.5	10621.1	5971.13	4953.98	5239.76	7400.21	8768.19	7733.38	7384.64	5004.17	7134.02	5946.08
C8A	100	100	100	100	100	100	100	100	100	100	100	100	100	100	100	100	100	100	100	100	100	100	100	100	100	100	100	100	100	100	100	100	100	100	100	100	100	100	100	100	100	100	100	100	100	100	100	100	100
C8B	100	100	100	100	100	100	100	100	100	100	100	100	100	100	100	100	100	100	100	100	100	100	100	100	100	100	100	100	100	100	100	100	100	100	100	100	100	100	100	100	100	100	100	100	100	100	100	100	100
C8G	100	100	100	100	100	100	100	100	100	100	100	100	100	100	100	100	100	100	100	100	100	100	100	100	100	100	100	100	100	100	100	100	100	100	100	100	100	100	100	100	100	100	100	100	100	100	100	100	100
C9	100	100	100	100	100	100	100	100	100	100	100	100	100	100	100	100	100	100	100	100	100	100	100	100	100	100	100	100	100	100	100	100	100	100	100	100	100	100	100	100	100	100	100	100	100	100	100	100	100
CAMP	100	100	100	100	100	100	100	100	100	100	100	100	100	100	100	100	100	100	100	100	100	100	100	100	100	100	100	100	100	100	100	100	100	100	100	100	100	100	100	100	100	100	100	100	100	100	100	100	100
CARD11	100	100	100	100	100	100	100	100	100	100	100	100	100	100	100	100	100	100	100	100	100	100	100	100	100	100	100	100	100	100	100	100	100	100	100	100	100	100	100	100	100	100	100	100	100	100	100	100	100
CARD9	100	100	100	100	100	100	100	100	100	100	100	100	100	100	100	100	100	100	100	100	100	100	100	100	100	100	100	100	100	100	100	100	100	100	100	100	100	100	100	100	100	100	100	100	100	100	100	100	100
CASP1	100	100	119.75	100	100	100	100	252.17	100	104.95	123.81	100	128.97	100	100	140.15	100	100	100	100	100	100	163.56	138.73	100	100	100	100	100	100	154.32	100	185.83	100	100	100	183.72	100	100	100	177.43	100	210.71	100	317.81	100	100	100	100
CASP10	100	100	100	100	100	100	100	100	100	100	100	100	100	100	100	100	100	100	100	100	100	100	100	100	100	100	100	100	100	100	100	100	100	100	100	100	100	100	100	100	100	100	100	100	100	100	100	100	100
CASP3	100	100	133.64	100	100	100	100	225.69	100	119.43	154.24	114.28	154.5	100	100	140.79	100	100	100	100	100	100	136.88	174.75	100	100	100	100	100	100	149.95	100	100	100	100	100	100	100	100	243.51	199.76	100	100	100	261.98	100	100	100	100
CASP8	226.56	263.75	324	231.74	195.66	258.18	199.67	458.72	275.73	280.84	378.61	185.84	321.9	100	177.12	311.02	157.45	243.02	205.96	100	100	100	308.45	308.9	219.06	227.82	175.1	100	269.31	100	307.55	272.04	399.89	240.21	227.04	224.14	303.52	100	100	423.59	371.31	267.33	459.25	100	435.2	393	100	100	422.9
CCL1	100	100	100	100	100	100	100	100	100	100	100	100	100	100	100	100	100	100	100	100	100	100	100	100	100	100	100	100	100	100	100	100	100	100	100	100	100	100	100	100	100	100	100	100	100	100	100	100	100
CCL11	100	119.46	100	100	100	100	100	157.66	153.19	134.5	100	100	100	100	100	100	100	100	100	100	100	100	100	100	100	100	100	100	100	100	100	100	100	100	100	100	100	100	100	100	123.38	100	100	100	100	100	100	100	100
CCL13	100	100	100	100	100	100	100	100	100	100	100	100	100	100	100	100	100	100	100	100	100	100	100	100	100	100	100	100	100	100	100	100	100	100	100	100	100	100	100	100	100	100	100	100	100	100	100	100	100
CCL14	229.1	100	100	100	684.91	100	100	100	100	459.88	519.34	217.88	307.15	100	216.67	186.86	430.65	100	348.7	100	100	100	292.16	100	225.09	199.67	278.01	100	591.86	100	120.39	100	100	100	100	329.89	100	100	100	100	279.66	206.97	100	100	204.72	100	100	100	100
CCL15	168.95	100	160.01	219.28	100	100	236.93	183.89	153.15	137.81	100	220.01	162.13	100	210.8	259.8	249.57	174.61	100	100	100	100	175.63	100	100	298.22	139.26	100	100	100	148.85	100	219.18	100	100	100	199.08	100	100	100	200.93	100	100	100	100	100	100	100	100
CCL16	100	100	100	100	100	100	100	100	100	100	100	100	100	100	100	100	100	100	100	100	100	100	100	100	100	100	100	100	100	100	100	100	100	100	100	100	100	100	100	100	100	100	100	100	100	100	100	100	100
CCL17	100	100	100	100	100	100	100	100	100	100	100	100	100	100	100	100	100	100	100	100	100	100	100	100	100	100	100	100	100	100	100	100	100	100	100	100	100	100	100	100	100	100	100	100	100	100	100	100	100
CCL18	100	100	100	100	100	100	100	100	100	100	100	100	100	100	100	100	100	100	100	100	100	100	100	100	100	100	100	100	100	100	100	100	100	100	100	100	100	100	100	100	100	100	100	100	100	632.54	100	100	100
CCL19	100	100	1385.69	1031.13	100	561.37	100	2534.72	1739.95	334.56	9242.66	100	981.59	2468.03	100	1320.24	100	100	100	100	994.73	100	1582.38	3216.09	269.31	279.02	100	100	100	100	100	998.97	1380.24	2220.41	776.29	100	100	2808.75	100	1813.03	1426.5	391.52	1813.58	665.61	963.45	1586.97	100	1060.33	3981.01
CCL2	181.71	830.49	413.97	321.44	234.7	259.96	519.94	1393	1137.07	575.31	490.68	149.52	850.58	690.53	328.83	622.61	162.67	235.57	219.85	100	772.26	100	452.95	460.19	723.52	364.77	100	100	100	100	705.95	733.12	1071.3	496.19	378.27	497.88	831.18	100	520.77	282.39	556.97	619.18	1111.2	509.43	256.25	516.51	100	414.19	1338.66
CCL20	100	100	100	100	100	100	100	100	100	100	100	100	100	100	100	100	100	100	100	100	100	100	100	100	100	100	100	100	100	100	100	248.9	100	100	100	100	133.97	100	100	100	100	100	100	100	100	100	100	100	100
CCL21	407.6	100	546.53	100	473.46	387.2	100	864.81	702.75	418	3948.66	136.71	289.02	800.57	169.68	790.47	191.22	100	100	100	855.31	100	517.73	1127.66	259.26	236.78	100	100	834.38	508.33	186.06	392.33	100	546.98	801.43	525.5	432.64	1631.01	937.38	810.34	1454.7	303.55	2429.52	416.47	924.8	1171.51	100	785.3	823.55
CCL22	100	100	100	100	100	100	100	100	100	100	100	100	100	100	100	100	100	100	100	100	100	100	100	100	100	100	100	100	100	100	100	100	100	100	100	100	100	100	100	100	100	100	100	100	100	100	100	100	100
CCL23	100	100	100	100	100	100	100	100	100	100	100	100	100	100	100	100	100	100	100	100	100	100	100	100	100	100	100	100	100	100	100	100	100	100	100	100	100	100	100	100	100	100	100	100	100	100	100	100	100
CCL24	100	100	100	100	100	100	100	100	100	100	100	100	100	100	100	100	100	100	100	100	100	100	100	100	100	100	100	100	100	100	100	100	100	100	100	100	100	100	100	100	100	100	100	100	100	100	100	100	100
CCL25	100	100	100	100	100	100	100	100	100	100	100	100	100	100	100	100	100	100	100	100	100	100	100	100	100	100	100	100	100	100	100	100	100	100	100	100	100	100	100	100	100	100	100	100	100	100	100	100	100
CCL26	100	100	100	100	100	100	100	100	100	100	100	100	100	100	100	100	100	100	100	100	100	100	100	100	100	100	100	100	100	100	100	100	100	100	100	100	100	100	100	100	100	100	100	100	100	100	100	100	100
CCL27	100	100	100	100	100	100	100	100	100	100	100	100	100	100	100	100	100	100	100	100	100	100	100	100	100	100	100	100	100	100	100	100	100	100	100	100	100	100	100	100	100	100	100	100	100	100	100	100	100
CCL28	100	100	100	100	100	100	100	100	100	100	100	100	100	100	100	100	100	100	100	100	100	100	100	100	100	100	100	100	100	100	100	100	100	100	100	100	100	100	100	100	100	100	100	100	100	100	100	100	100
CCL3	100	100	100	100	100	100	100	275.56	100	100	100	100	100	100	100	100	100	100	100	100	100	100	100	100	100	100	100	100	100	100	100	100	100	100	100	100	100	100	100	100	100	100	100	100	100	100	100	100	100
CCL3L1	100	100	100	100	100	100	100	107.38	100	100	100	100	100	100	100	100	100	100	100	100	100	100	100	100	100	100	100	100	100	100	100	100	100	100	100	100	100	100	100	100	100	100	100	100	100	100	100	100	100
CCL4	100	100	100	100	100	100	100	661.32	100	100	100	100	100	100	100	174.65	100	100	100	100	100	100	100	100	100	100	100	100	100	100	100	100	100	100	100	100	100	100	100	100	100	100	100	100	100	100	100	100	100
CCL5	100	100	188.7	100	100	100	100	598.51	100	152.27	470.79	100	213.53	409.96	100	125.3	100	100	100	100	100	100	100	297.23	100	245.74	100	100	100	100	276.91	100	100	100	100	100	191.49	416.11	100	100	237.36	100	293.56	100	241.94	100	100	100	324.33
CCL7	100	100	100	100	100	100	100	100	100	100	100	100	100	100	100	100	100	100	100	100	100	100	100	100	100	100	100	100	100	100	100	100	100	100	100	100	100	100	100	100	100	100	100	100	100	100	100	100	100
CCL8	100	135.1	100	100	100	100	100	262.76	100	100	100	100	100	100	100	100	100	100	100	100	100	100	100	100	100	100	100	100	100	100	100	100	100	100	100	100	100	100	100	100	100	100	100	100	100	100	100	100	100
CCND3	100	100	352.21	100	100	100	100	252.72	100	188.73	300.33	100	245.68	100	161.59	156.99	100	100	100	100	100	100	195.77	353	100	129.27	150.01	100	100	100	139	256.91	100	100	237.44	100	100	100	100	292.62	244.41	100	192.7	100	220.46	100	100	100	100
CCR1	100	100	100	100	100	100	100	267.11	100	100	100	100	100	100	100	107.77	100	100	100	100	100	100	100	178.79	100	100	100	100	100	100	130.25	100	100	100	100	100	100	100	100	100	152.76	100	100	100	173.22	100	100	100	381.57
CCR2	100	100	100	100	100	100	100	275.67	100	100	100	100	113.99	100	100	100	100	100	100	100	100	100	100	100	100	100	100	100	100	100	100	100	100	100	100	100	100	100	100	100	146.88	100	100	100	154.61	100	100	100	419.72
CCR3	100	100	100	100	100	100	100	100	100	100	100	100	100	100	100	100	100	100	100	100	100	100	100	100	100	100	100	100	100	100	100	100	100	100	100	100	100	100	100	100	100	100	100	100	100	100	100	100	100
CCR4	100	100	100	100	100	100	100	100	100	100	100	100	100	100	100	100	100	100	100	100	100	100	100	100	100	100	100	100	100	100	100	100	100	100	100	100	100	100	100	100	100	100	100	100	100	100	100	100	100
CCR5	100	100	100	100	100	100	100	100	100	100	100	100	100	100	100	100	100	100	100	100	100	100	100	100	100	100	100	100	100	100	100	100	100	100	100	100	100	100	100	100	100	100	100	100	100	100	100	100	100
CCR6	100	100	100	100	100	100	100	100	100	100	100	100	100	100	100	100	100	100	100	100	100	100	100	100	100	100	100	100	100	100	100	100	100	100	100	100	100	100	100	100	100	100	100	100	100	100	100	100	100
CCR7	100	100	100	100	100	100	100	100	100	100	100	100	100	100	100	100	100	100	100	100	100	100	100	100	100	100	100	100	100	100	100	100	100	100	100	100	100	100	100	100	100	100	100	100	100	100	100	100	100
CCR9	100	100	100	100	100	100	100	100	100	100	100	100	100	100	100	100	100	100	100	100	100	100	100	100	100	100	100	100	100	100	100	100	100	100	100	100	100	100	100	100	100	100	100	100	100	100	100	100	100
CCRL2	100	100	100	100	100	100	100	100	100	100	100	100	100	100	100	100	100	100	100	100	100	100	100	100	100	100	100	100	100	100	100	100	100	100	100	100	100	100	100	100	100	100	100	100	100	100	100	100	100
CD14	100	185.06	399.57	242.48	182.97	100	400.46	1184.37	239.42	478.41	492.54	189.04	583.43	458.63	268.7	417.97	100	201.07	222.84	100	493.62	100	328.06	635.62	405.97	257.26	129.02	100	543.61	100	693.91	404.32	453.34	457.11	413.53	342.37	590.33	527.57	487.74	439.96	634.52	355.3	680.77	650.73	406.57	711.14	100	513.6	1656.63
CD160	100	100	100	100	100	100	100	100	100	100	100	100	100	100	100	100	100	100	100	100	100	100	100	100	100	100	100	100	100	100	100	100	100	100	100	100	100	100	100	100	100	100	100	100	100	100	100	100	100
CD163	100	613.61	609.76	100	100	100	339.59	1562.58	382.86	234.99	318.41	100	486.05	100	100	265.26	100	100	100	100	100	100	330.28	1049.23	241.17	183.03	100	100	1520.34	801.36	690.63	1189.19	406.83	100	888.96	100	368.56	969.69	566.49	634.36	1251.42	241.46	617.74	568.93	2018.52	692.43	100	444.01	1618.48
CD164	4792.08	3500.53	3379.19	3164.8	2639.17	4295.6	3303.5	3305.43	3317.58	2784.49	2163.03	3957.04	3059.51	5106.6	2673.39	4580.69	5919.51	2483.24	3038.83	3235.21	2187.74	3170.81	2852.71	3107.73	1639.97	3462.14	3967.4	4145.59	2471.12	2614.23	2543.61	2642.52	3729.54	2204.55	2743.27	2042.41	3605.32	2611.84	2542.86	2780.94	1961.15	3168.35	2024.3	2056.32	2510.99	3286.22	3192.64	3074.95	2747.28
CD180	100	100	100	100	100	100	100	100	100	100	100	100	100	100	100	100	100	100	100	100	100	100	100	100	100	100	100	100	100	100	100	100	100	100	100	100	100	100	100	100	100	100	100	100	100	100	100	100	100
CD19	100	100	100	100	100	100	100	100	100	100	100	100	100	100	100	100	100	100	100	100	100	100	100	100	100	100	100	100	100	100	100	100	100	100	100	100	100	100	100	231.23	100	100	100	100	100	100	100	100	100
CD1A	100	100	100	100	100	100	100	100	100	100	100	100	100	100	100	100	100	100	100	100	100	100	100	100	100	100	100	100	100	100	100	100	100	100	100	100	100	100	100	100	100	100	100	100	100	100	100	100	100
CD1B	100	100	100	100	100	100	100	100	100	100	100	100	100	100	100	100	100	100	100	100	100	100	100	100	100	100	100	100	100	100	100	100	100	100	100	100	100	100	100	100	100	100	100	100	100	100	100	100	100
CD1C	100	100	100	100	100	100	100	100	100	100	100	100	100	100	100	100	100	100	100	100	100	100	100	100	100	100	100	100	100	100	100	100	100	100	100	100	100	100	100	100	100	100	100	100	100	100	100	100	100
CD1D	100	100	100	100	100	100	100	100	100	100	100	100	100	100	100	100	100	100	100	100	100	100	100	100	100	100	100	100	100	100	100	100	100	100	100	100	100	100	100	100	100	100	100	100	100	100	100	100	100
CD1E	100	100	100	100	100	100	100	100	100	100	100	100	100	100	100	100	100	100	100	100	100	100	100	100	100	100	100	100	100	100	100	100	100	100	100	100	100	100	100	100	100	100	100	100	100	100	100	100	100
CD2	100	100	100	100	100	100	100	100	100	100	100	100	100	100	100	100	100	100	100	100	100	100	100	100	100	100	100	100	100	100	100	100	100	100	100	100	100	100	100	100	100	100	100	100	100	100	100	100	100
CD200	100	100	100	100	100	100	100	100	100	100	100	100	100	100	100	100	100	100	100	100	100	100	100	100	100	100	100	100	100	100	100	100	100	100	100	100	100	100	100	100	135.13	100	100	100	100	100	100	100	100
CD207	100	100	100	100	100	100	100	100	100	100	100	100	100	100	100	100	100	100	100	100	100	100	100	100	100	100	100	100	100	100	100	100	100	100	100	100	100	100	100	100	100	100	100	100	100	100	100	100	100
CD209	100	100	100	100	100	100	100	100	100	100	100	100	100	100	100	100	100	100	100	100	100	100	100	100	100	100	100	100	100	100	100	100	100	100	100	100	100	100	100	100	119.85	100	100	100	100	100	100	100	100
CD22	100	100	100	100	100	100	100	100	100	100	100	100	100	100	100	100	100	100	100	100	100	100	100	100	100	100	100	100	100	100	100	100	100	100	100	100	100	100	100	282.39	100	100	100	100	100	100	100	100	100
CD24	3308.24	5386.45	3434.8	4340.57	4013.74	4463.55	4153.41	2629.69	3945.17	3730.45	4888.26	4307.36	5474.99	5458.87	5521.06	2660.83	2909.12	6037.35	5005.82	6104.09	6827.7	4575.26	5241.49	3809.57	8398.81	5105.54	5426.56	3628.01	3149.19	4501.4	8587.42	5743.94	4103.02	5842.63	4606.14	5695.72	3796.35	3198.86	5029.83	6290.36	5280.64	5910.69	12149.4	13263.8	7580.2	4667.33	3873.84	5937.83	7838.01
CD244	100	100	100	100	100	100	100	100	100	100	100	100	100	100	100	100	100	100	100	100	100	100	100	100	100	100	100	100	100	100	100	100	100	100	100	100	100	100	100	100	100	100	100	100	100	100	100	100	100
CD247	100	100	100	100	100	100	100	100	100	100	100	100	100	100	100	100	100	100	100	100	100	100	100	100	100	100	100	100	100	100	100	100	100	100	100	100	100	100	100	100	100	100	100	100	100	100	100	100	100
CD27	100	100	100	100	100	100	100	100	100	100	606.68	100	100	100	100	100	100	100	100	100	100	100	100	100	100	100	100	100	100	100	100	100	100	100	100	100	100	100	100	100	100	100	100	100	100	100	100	100	100
CD274	100	100	100	100	100	100	100	100	100	100	100	100	100	100	100	100	100	100	100	100	100	100	100	100	100	100	100	100	100	100	100	100	100	100	100	100	100	100	100	100	100	100	100	100	100	100	100	100	100
CD276	224.08	252.34	289.29	223.86	246.14	255.04	263.05	527.84	412.17	267.73	318.41	248.85	371.71	100	226.17	267.49	229.98	266.98	246.42	100	100	100	350.95	379.81	305.48	261.1	180.73	100	285.25	100	303.18	440.75	342.62	295.53	251.02	272.83	387.64	100	350.56	358.1	399.51	312.18	556.5	100	405.14	411.71	100	100	454.7
CD28	100	100	100	100	100	100	100	100	100	100	100	100	100	100	100	100	100	100	100	100	100	100	100	100	100	100	100	100	100	100	100	100	100	100	100	100	100	100	100	100	100	100	100	100	100	100	100	100	100
CD2AP	702.7	802.6	918.95	776.9	749.79	596.3	864.09	969.03	1006.37	699.48	759.36	758.3	856.68	1158.66	685.94	1087.54	794.16	727.4	638.33	1130.31	769.48	852.94	955.03	1045.93	834.05	783.3	786.93	889.58	886.62	681.78	722.37	915.39	1133.52	753.83	906.95	703.1	1394.41	609.31	833.22	806.25	752.03	683	817.64	684.2	911.91	640.03	714.88	679.27	750.41
CD33	100	100	100	100	100	100	100	100	100	100	100	100	100	100	100	100	100	100	100	100	100	100	100	100	100	100	100	100	100	100	100	100	100	100	100	100	100	100	100	100	100	100	100	100	100	100	100	100	100
CD34	100	100	100	100	100	100	100	100	100	100	100	100	100	100	100	100	100	100	100	100	100	100	100	100	100	100	100	100	100	100	100	100	100	100	100	100	100	100	100	100	100	100	100	100	100	100	100	100	100
CD36	100	100	100	100	100	100	100	350.98	100	220.33	100	136.71	105.59	100	100	100	100	100	100	100	100	100	172.25	291.74	100	100	100.35	100	100	100	140.1	100	100	261.21	100	481.98	100	100	100	100	159.81	100	100	100	100	100	100	100	100
CD37	100	100	100	100	100	100	100	100	100	100	100	100	100	100	100	100	100	100	100	100	100	100	100	100	100	100	100	100	100	100	100	100	100	100	100	100	100	100	100	100	100	100	100	100	100	100	100	100	100
CD38	100	100	100	100	100	100	100	263.41	100	100	100	100	100	100	100	100	100	100	100	100	100	100	100	100	100	100	100	100	100	100	100	100	100	100	100	100	100	100	100	100	131.6	100	100	100	100	100	100	100	378.39
CD3D	100	100	100	100	100	100	100	100	100	100	100	100	100	100	100	100	100	100	100	100	100	100	100	100	100	100	100	100	100	100	100	100	100	100	100	100	100	100	100	100	119.85	100	192.7	100	143.16	100	100	100	100
CD3E	100	100	100	100	100	100	100	100	100	100	100	100	100	100	100	100	100	100	100	100	100	100	100	100	100	100	100	100	100	100	100	100	100	100	100	100	100	100	100	100	100	100	100	100	100	100	100	100	100
CD3EAP	100	100	100	100	100	100	100	100	100	100	100	100	100	100	100	100	100	100	100	100	100	100	100	100	100	100	100	100	100	100	100	100	100	100	100	100	100	100	100	100	100	100	100	100	100	100	100	100	100
CD3G	100	100	100	100	100	100	100	100	100	100	100	100	100	100	100	100	100	100	100	100	100	100	100	100	100	100	100	100	100	100	100	100	100	100	100	100	100	100	100	100	100	100	100	100	100	100	100	100	100
CD4	100	100	222.9	100	100	100	204.29	625.62	307.29	265.46	362.77	100	255.76	100	100	446.99	100	100	100	100	100	100	238.8	319.71	100	100	100	100	304.7	100	156.51	267.49	440.14	271.42	100	100	364.75	100	100	100	266.73	100	198.11	100	289.18	393	100	100	400.64
CD40	204.28	163.75	216.87	100	241.06	100	100	415.98	340.67	157.44	341.64	196.52	288.96	100	169.51	206.79	142.64	100	100	100	100	100	223.63	261.98	235.14	184.31	157.69	100	292.25	100	247.36	304.35	334.2	334.71	214.63	100	231.07	100	100	253.74	271.43	255.26	291.76	100	309.22	100	100	100	419.72
CD40LG	100	100	100	100	100	100	100	100	100	100	100	100	100	100	100	100	100	100	100	100	100	100	100	100	100	100	100	100	100	100	100	100	100	100	100	100	100	100	100	100	100	100	100	100	100	100	100	100	100
CD44	1116.43	669.72	805.22	1062.16	1649.23	1107.24	619.78	1212.1	1062.3	1073.22	1736.85	652.57	872.88	833.75	610.97	609.98	570.24	663.48	919.76	1388.44	1294.99	1541.36	788.55	1203.28	562.73	929.21	570.87	540.15	680	100	559.29	883.3	785.94	797.69	664.82	649.69	809.47	991.98	924.68	861.5	955.31	664.03	1986.48	866.41	558.31	984.37	920.74	1255.83	1806.08
CD46	1902.54	3296.02	1809.28	1984.57	2327.56	2341.97	2495.62	1982.62	2225.09	2416.52	2078.12	3711.4	1852	2374.57	2191.81	3038.59	3052.93	1852.11	2095.73	2342.13	2171.14	2158.52	2696.3	2280.07	4071.79	2302.55	2104.27	2664.4	2489.64	2794.9	2804.1	2595.71	2535.4	3376.67	3472.19	2761.78	3326.04	2080.56	2395.52	2183.41	1918.85	2421.54	1945.06	2866.95	3170.94	3136.51	3226.33	2412.24	1707.51
CD47	514.92	597.29	547.62	560.91	516.47	423.18	580.85	767.73	621.17	567.01	703.14	649.36	611.54	617.91	451.92	693.04	556.57	430.11	384.24	476.05	607.11	494.6	661.95	756.92	1055.13	565.72	444.41	453.83	628.73	541.66	695	678.77	730.55	623.58	629.95	661.24	899.39	713.33	668.1	597.52	761.43	638.15	914.9	777.16	1282.69	711.14	737.34	735.6	1017.51
CD48	100	100	100	100	100	100	100	223.66	100	100	100	100	164.54	100	100	100	100	100	100	100	100	100	100	100	100	100	100	100	100	100	100	100	100	100	100	100	100	100	100	100	171.56	100	208.91	100	200.42	100	100	100	387.93
CD5	100	100	100	100	100	100	100	100	100	100	100	100	100	100	100	100	100	100	100	100	100	100	100	100	100	100	100	100	100	100	100	100	100	100	100	100	100	100	100	100	100	100	100	100	100	100	100	100	100
CD53	100	333.76	273.28	168.47	100	178.7	257.29	770.93	278.43	301.9	473.92	122.82	298.47	417.53	100	299.68	100	100	112.85	100	100	100	236.15	480.98	285.39	230.38	100	100	525.83	291.29	461.88	352.77	315.23	245.69	367.68	176.59	361.05	705.9	477.58	585.24	482.94	205.24	450.24	100	926.23	647.51	100	100	1033.41
CD55	100	100	100	100	100	100	100	100	100	100	100	100	100	100	100	100	100	100	100	100	100	100	100	100	100	100	100	100	100	100	100	100	100	100	100	100	100	100	100	100	100	100	100	100	100	100	100	100	100
CD58	408.14	317.91	345.04	249.29	314.08	372.37	253.87	393.49	411.11	327.96	321.04	275.55	303.4	359.74	242.41	428.38	420.82	266.21	249.78	100	100	100	366.81	314.19	339.65	259.82	231.93	262.17	324.97	100	255.02	404.32	393.3	100	401.25	277.61	471.72	100	100	276.25	329.01	343.22	352.99	100	458.1	100	100	100	400.64
CD59	4231.86	4876.67	4652.46	4785.54	4263.73	4337.19	3619.22	4521.7	4731.04	4442.18	3567.74	5530.25	4732.18	4074.18	4175.59	3869.34	4457.93	3780.93	4453.91	4780.45	4628.31	4292.75	3389.48	4593.75	4871.67	4864.92	4292	4145.28	4377.79	4567.46	6360.12	4484.76	4325.63	5202.02	5122.63	4067.37	6278.27	3614.97	4773.26	5236.51	4232.5	5193.19	4641.12	4856.34	5437.13	5318.59	5239.97	4993.48	5828.43
CD6	100	100	100	100	100	100	100	100	100	100	100	100	100	100	100	100	100	100	100	100	100	100	100	100	100	100	100	100	100	100	100	100	100	100	100	100	100	100	100	100	100	100	100	100	100	100	100	100	100
CD63	5002.41	5267.71	6700.12	5724.2	5803.75	5256.45	5524.72	8018	8584.86	6617.59	6827.8	5287.81	7680.6	10507.9	5956.05	7176.22	5426.75	5795.05	5408.39	9901	8469.96	6409.2	7775.31	8072.49	5012.36	6025.79	4829.58	6363.33	6101.57	5049.48	4711.81	11124.2	7079.58	6863.41	6717.25	6609.16	11065.4	5197.68	5464.22	4201.08	6723.6	5705.44	9633.43	5124.07	7359.74	9125.06	6265.51	6027.3	6693.31
CD68	100	100	475.83	281.52	100	100	253.52	1077.66	250.7	331.81	404.11	166.61	519.49	523.95	240.8	372.6	100	100	199.31	100	100	100	315.69	688.85	100	264.94	123.9	100	456.94	100	314.12	475.14	470.51	100	230.84	100	405.59	490.42	464.88	415.4	540.52	331.15	394.41	100	389.39	797.23	456.63	470.52	817.19
CD7	100	100	100	100	100	100	100	100	100	100	100	100	100	100	100	100	100	100	100	100	100	100	100	100	100	100	100	100	100	100	100	100	100	100	100	100	100	100	100	100	100	100	100	100	100	100	100	100	100
CD70	100	100	100	100	100	100	100	100	100	100	100	100	100	100	100	100	100	100	100	100	100	100	100	100	100	100	100	100	100	100	100	100	100	100	100	100	100	100	100	100	100	100	100	100	100	100	100	100	100
CD74	2763.39	2469.26	6799.84	5211.88	3772.76	3028.94	5200.01	10379.5	4406.99	5235.37	7925.23	3327.97	8529	5805	4090.56	4998.01	1715.24	2950.23	3460.02	6471.99	5619.6	3427.94	4905.9	8144.01	4590.31	6407.2	1722.33	2327	5444.28	5120.98	9466.3	4224.08	5108.19	4606.54	4345.14	3481.68	6873.36	13545.9	9320.43	8870.76	11086.5	5834.8	13556	9288.78	8015.4	8698.38	5007.92	9705.31	17494.8
CD79A	100	100	100	100	100	100	100	100	100	100	131.84	100	100	100	100	100	100	100	100	100	100	100	100	100	100	100	100	100	100	100	100	100	100	100	100	100	100	100	100	339.69	100	100	100	100	150.32	100	100	100	403.82
CD79B	100	100	100	100	100	100	100	100	100	100	222.43	100	100	100	100	100	100	100	100	100	100	100	100	100	100	100	100	100	100	100	100	100	100	100	100	100	100	100	100	333.55	100	100	100	100	100	100	100	100	327.51
CD80	100	100	100	100	100	100	100	100	100	100	100	100	100	100	100	100	100	100	100	100	100	100	100	100	100	100	100	100	100	100	100	100	100	100	100	100	100	100	100	100	100	100	100	100	100	100	100	100	100
CD81	6072.73	8661.17	6984.57	7282.94	6720.42	7013.68	7779.99	8641.7	8153.4	9694.3	8435.94	6949.66	7035.91	6361.46	6271.67	7365.57	6528.83	5989.7	6179.95	8031.28	8439.9	7384.13	8379.99	8871.04	7655.2	5849.17	6020.98	6279.8	8083.33	8427.91	7173.33	9002.38	7133.88	9536.82	9034.37	9241.48	8306.73	8025.01	7107.81	5836.08	6030.32	6742.01	7418.22	9404.05	9836.36	7204.98	7365.9	6858.99	7796.68
CD83	497.84	507.29	258.54	259.59	269.7	288.22	243.57	376.69	492.02	337.42	257.69	238.17	230.76	100	197.32	330.37	269	251	245.33	100	100	100	214.97	280.73	100	230.38	114.17	100	100	100	199.2	100	313.35	310.12	263.81	100	361.72	100	350.56	206.68	118.68	222.49	100	100	100	100	100	100	100
CD84	100	100	153.87	100	100	100	100	519.37	100	100	290.9	100	222.89	100	100	171.26	100	100	100	100	100	100	174.57	360.61	217.05	100	100	100	471.68	100	149.95	310.07	365.93	100	100	100	264.01	100	100	257.84	227.96	100	241.33	100	366.48	100	100	100	394.29
CD86	100	100	100	100	100	100	100	100	100	100	100	100	100	100	100	100	100	100	100	100	100	100	100	100	100	100	100	100	100	100	100	100	100	100	100	100	100	100	100	100	100	100	100	100	100	100	100	100	100
CD8A	100	100	100	100	100	100	100	100	100	100	100	100	100	100	100	100	100	100	100	100	100	100	100	100	100	100	100	100	100	100	100	100	100	100	100	100	100	100	100	100	100	100	100	100	100	100	100	100	100
CD8B	100	100	100	100	100	100	100	100	100	100	100	100	100	100	100	100	100	100	100	100	100	100	100	100	100	100	100	100	100	100	100	100	100	100	100	100	100	100	100	100	100	100	100	100	100	100	100	100	100
CD9	1087.79	2785.79	1362.52	1437.08	1629.15	1405.36	1176.07	1115.74	1017.51	1586.45	1490.38	1210.08	1067.18	992.68	1516.37	1193.35	1457.36	1354.22	1258.73	1310.27	1628.91	1270.72	1344.09	1271.02	1643.99	883.13	1172.96	1375.84	1866.98	1790.26	1293.69	1400.62	1162.44	2282.48	1919.41	1578.66	1343.62	1285.49	1229.51	920.84	809.6	910.66	772.62	1364.68	1407.24	976.88	1332.45	811.81	718.62
CD96	100	100	100	100	100	100	100	100	100	100	100	100	100	100	100	100	100	100	100	100	100	100	100	100	100	100	100	100	100	100	100	100	100	100	100	100	100	100	100	100	100	100	100	100	100	100	100	100	100
CD97	318.02	419.37	273.78	296.95	307.2	292.59	329.53	610.78	348.8	529.11	518.56	335.36	373.68	100	255.84	361.75	244.42	313.48	297.38	100	445	300.67	319.27	390.16	560.72	399.33	163.84	179.73	332.86	263.66	429.04	417.95	313.92	419.77	422.27	365.21	409.77	910.24	510.6	562.74	454.74	495	693.38	725.1	637.05	486.57	100	394.31	635.94
CD99	1113.97	1041.36	1244.28	961.12	1139.73	1261.51	742.56	1120.84	1603.78	1281.45	1321.46	1061.62	1101.55	1221.01	1113.43	1017.07	842.74	891.59	864.38	1650.26	1131.4	1258.07	979.67	1166.9	1067.19	1685.63	734.7	622	1142.23	783.35	1289.32	1292.45	971.97	1268.67	940.6	1102.4	1143.26	2021.11	1869.67	1712.76	1988.17	1726.46	2863.55	1453.93	1599.07	2421.62	1246.36	1742.91	1704.33
CDH1	668.75	1007.45	704.62	807.45	972.84	825.64	952.64	568.22	787.89	771.38	886.04	1024.24	678.3	622.77	832.46	715.15	805.85	919.69	786.89	859.22	956.63	653.97	788.55	593.21	1505.31	633.55	702.45	673.26	997.82	1012.74	1044.15	741.54	650.93	902.59	715.67	859.62	948.98	761.63	998.34	796.01	628.65	872.72	626.74	1115.55	969.18	662.48	969.39	679.27	699.54
CDH5	183.66	100	221.71	100	374.56	100	215.54	285.71	100	282.03	248.2	211.47	200.92	100	151.15	315.78	144.91	186.52	240.1	100	100	100	238.9	226.02	100	171.51	151.55	100	320.3	100	181.69	252.12	314.07	299.14	241.57	302.02	236.8	100	100	243.51	226.78	215.59	100	100	150.32	100	100	100	100
CDK1	100	100	100	100	100	100	100	100	100	100	100	100	100	100	100	100	100	100	100	100	100	100	100	100	100	100	100	100	100	100	100	100	100	100	100	100	100	100	100	100	100	100	100	100	100	100	100	100	100
CDKN1A	100	313.06	100	100	100	100	100	100	100	100	100	100	100	100	100	100	100	100	100	100	100	100	100	100	100	100	100	100	100	100	130.25	100	100	100	100	100	100	100	100	100	207.98	193.17	389.01	100	279.16	100	100	100	362.49
CEACAM1	300.33	334	186.91	218.29	297.42	365.26	202.98	233.61	198.62	240.92	100	216.81	163.37	100	110.42	255.07	276.07	181.43	209.81	100	100	100	207.62	100	100	229.1	166.4	100	311.59	100	274.72	100	100	227.87	100	100	223.66	401.25	391.21	100	192.71	265.61	100	100	100	100	100	100	100
CEACAM6	100	100	100	100	100	100	100	100	100	100	100	100	100	100	100	100	100	100	100	100	100	100	100	100	100	100	100	100	100	100	100	100	100	100	100	100	100	100	100	100	100	100	100	100	100	100	100	100	100
CEACAM8	100	100	100	100	100	100	100	100	100	100	100	100	100	100	100	100	100	100	100	100	100	100	100	100	100	100	100	100	100	100	100	100	100	100	100	100	100	100	100	100	100	100	100	100	100	100	100	100	100
CEBPB	100	801.53	274.19	204.61	100	100	282.25	572.36	405.07	241.22	286.27	183.7	341.52	406.15	169.67	299.29	285.72	162.42	100	100	100	100	355.36	646.29	337.64	149.75	117.76	100	556.34	465.86	273.62	612.2	401.24	100	487.95	297.83	446.12	401.25	287.06	341.73	485.29	213.87	641.15	100	669.98	378.03	100	100	432.44
CFB	100	187.66	331.34	100	100	100	309.24	652.85	202.88	188.49	186.3	131.37	633.02	100	165.38	525.05	100	100	100	100	100	100	380.66	422.06	271.32	234.22	154.62	100	100	318.88	313.03	301.32	416.18	100	209.02	100	925.09	100	100	255.79	475.89	243.19	720.39	449.94	1006.4	482.83	100	374.43	581.89
CFD	100	100	100	100	100	100	100	100	100	135.79	160	100	100	100	100	100	100	100	100	100	100	100	111.47	100	100	100	100	100	100	100	100	129.63	100	100	100	192.59	100	100	100	100	142.18	100	100	100	293.47	100	100	100	100
CFI	1700.39	735.18	2285.16	1388.54	1139.09	1823.76	1429.16	2538.56	1909.28	1494.78	1312.82	2019.64	2555.02	2424	1769.13	3379.15	1869.34	1630.52	1130.27	3202.48	1671.04	2056.04	2095.87	2427.13	1284.24	2655.8	1535.96	2102.95	1346.67	2044.63	1765.42	2108.86	2626.01	832.75	1389.35	1246.31	3442.92	1686.74	1862.05	2308.24	2523.99	2193.87	2877.96	1903.86	2692.8	3091.59	3611.84	3101.46	3144.74
CFP	100	100	100	100	100	100	100	100	100	100	100	100	100	100	100	100	100	100	100	100	100	100	100	100	100	100	100	100	100	100	100	100	100	100	100	100	100	100	100	100	100	100	100	100	100	100	100	100	100
CHIT1	100	100	100	100	100	100	100	100	100	100	100	100	100	100	100	100	100	100	100	100	100	100	100	100	205	100	100	100	100	100	100	100	100	100	100	100	100	100	100	100	100	100	100	100	100	497.8	100	100	100
CHUK	317.22	364.44	340.93	375.7	251.79	322.48	277	266.01	357.17	302.37	267.94	347.11	291.04	100	347.48	316.28	299.16	317.4	276.48	100	100	100	228.1	286.67	261.27	386.53	283.13	308.79	294.21	323.31	338.2	262.15	332.79	264.97	209.24	276.86	317.34	100	332.78	345.83	323.14	348.4	342.19	100	257.68	100	100	361.17	368.85
CKLF	100	100	141.84	100	100	100	100	258.98	259.6	193.11	189.39	159.14	211.11	100	163.91	212.55	129.96	100	155.9	100	100	100	178.01	245.71	243.18	193.27	101.89	100	100	100	230.94	276.67	100	100	210.7	100	340.77	100	100	100	232.66	100	369.2	100	345.01	100	100	100	100
CLEC4A	100	100	100	100	100	100	100	100	100	100	100	100	100	100	100	100	100	100	100	100	100	100	100	100	100	100	100	100	100	100	100	100	100	100	100	100	100	100	100	100	100	100	100	100	100	100	100	100	100
CLEC4C	100	100	100	100	100	100	100	100	100	100	100	100	100	100	100	100	100	100	100	100	100	100	100	100	100	100	100	100	100	100	100	100	100	100	100	100	100	100	100	100	100	100	100	100	100	100	100	100	100
CLEC5A	100	100	100	100	100	100	100	100	100	100	100	100	100	100	100	100	100	100	100	100	100	100	100	100	100	100	100	100	100	100	100	100	100	100	100	100	100	100	100	100	100	100	100	100	100	100	100	100	100
CLEC6A	100	100	100	100	100	100	100	100	100	100	100	100	100	100	100	100	100	100	100	100	100	100	100	100	100	100	100	100	100	100	100	100	100	100	100	100	100	100	100	100	100	100	100	100	100	100	100	100	100
CLEC7A	100	100	100	100	100	100	100	100	100	100	100	100	100	100	100	100	100	100	100	100	100	100	100	100	100	100	100	100	100	100	100	100	100	100	100	100	100	100	100	100	100	100	100	100	100	100	100	100	100
CLU	100	100	100	100	100	100	100	100	100	100	100	100	100	100	100	100	100	100	100	100	100	100	100	100	100	100	100	100	100	100	100	100	100	100	100	100	100	100	100	100	100	100	100	100	100	100	100	100	100
CMA1	100	100	100	100	100	100	100	100	100	100	100	100	100	100	100	100	100	100	100	100	100	100	100	100	100	100	100	100	100	100	100	100	100	100	100	100	100	100	100	100	100	100	100	100	100	100	100	100	100
CMKLR1	100	100	315.99	100	195.38	231.69	152.37	471.28	233.25	227.33	247.35	137.78	223.4	100	100	222.16	135.98	143.81	139.72	100	100	100	227.8	280.3	100	183.03	111.1	100	359.93	100	251.73	219.71	253.06	100	188.07	100	225.98	646.46	287.06	304.9	346.64	174.2	284.55	100	416.59	486.57	100	100	629.58
Col1a2	416.43	532.2	633.84	546.22	722.7	563.02	650.16	645.57	631.22	973.51	1107.94	474.2	850.39	500.9	514.07	461.92	302.28	608.85	537.6	802.59	1416.74	597.95	821.97	656.17	787.83	581.08	321.53	100	432.03	421.11	553.81	897.93	497.19	762.33	559.85	674.35	779.92	694.76	685.89	562.74	887.16	563.99	1476.8	996.55	936.25	662.48	422.94	599.75	721.8
COL3A1	1333.6	1876.26	1910.24	1461.71	1775.15	1792.44	1917.94	3564.51	2996.04	2897.22	3583.13	2247.13	3351.1	3777.49	2120.9	1875.85	1038.61	1311.76	1319.75	2700.08	5997.77	1480.64	3279.17	2766.74	4710.89	2284.63	967.66	717.05	1626.62	1006.76	2609.28	4088.95	3409.22	3089.94	1731.66	2042.61	4684.6	2437.23	2339.63	2439.2	5619.06	2678.52	9148.96	3138.4	4964.71	2945.62	1598.19	2915.9	4044.61
COLEC12	100	100	100	100	100	100	100	100	100	100	100	100	100	100	100	100	100	100	100	100	100	100	100	100	100	100	100	100	100	100	100	100	100	100	100	100	100	100	100	100	100	100	100	100	100	100	100	100	100
CR1	240.5	100	168.69	235.68	100	286.06	100	245.15	288.32	148.17	100	168.75	156.78	100	100	258.17	260.15	100	187	100	100	100	100	100	100	100	132.6	100	100	100	136.81	100	100	100	100	100	400.97	100	297.22	100	196.23	236.29	225.12	100	164.63	100	100	100	100
CR2	100	100	100	100	100	100	100	100	100	100	100	100	100	100	100	100	100	100	100	100	100	100	100	100	100	100	100	100	100	100	100	100	100	100	100	100	261.11	100	100	100	100	100	100	100	100	100	100	100	100
CREB1	342.71	325.36	317.16	368.17	422.31	359.52	318.67	358.57	348.75	428.12	482.45	331.09	394.07	407.86	277.01	339.28	364.2	337.89	377.15	100	351.08	100	352.46	339.13	420.04	367.33	334.84	291.12	330.15	100	365.56	373.86	380.53	425.53	339.62	325.57	324.3	494.13	414.07	435.86	359.56	382.89	414.22	100	443.79	396.74	100	427.44	502.4
CREB5	100	100	100	100	100	100	100	100	207.45	100	100	100	179.28	100	100	111.93	100	100	100	100	100	100	192.13	100	100	100	100	100	100	100	142.28	100	100	100	100	100	209.13	100	100	261.93	202.11	222.49	434.04	100	168.93	100	100	100	100
CREBBP	100	100	100	100	100	100	100	100	100	100	100	100	100	100	100	100	100	100	100	100	100	100	100	100	100	100	100	100	100	100	100	100	100	100	100	100	100	100	100	100	100	100	100	100	100	100	100	100	100
CRP	100	100	100	100	100	100	100	100	100	100	100	100	100	100	100	100	100	100	100	100	100	100	100	100	100	100	100	100	100	100	100	100	100	100	100	100	100	100	100	100	100	100	100	100	100	100	100	100	100
CSF1	100	190.36	107.78	100	100	100	100	100	100	138.55	184.38	100	100.43	100	100	113.63	100	100	100	100	100	100	100	165.33	100	100	100	100	100	100	149.95	100	100	100	100	100	100	100	100	100	196.23	100	100	100	191.83	100	100	100	100
CSF1R	100	100	100	100	100	100	100	100	100	100	100	100	100	100	100	100	100	100	100	100	100	100	100	100	100	100	100	100	100	100	100	100	100	100	100	100	100	100	100	100	100	100	100	100	100	100	100	100	100
CSF2	100	100	100	100	100	100	100	100	100	100	100	100	100	100	100	100	100	100	100	100	100	100	100	100	100	100	100	100	100	100	100	100	100	100	100	100	100	100	100	100	100	100	100	100	100	100	100	100	100
CSF2RB	100	100	100	100	100	100	100	126.95	100	100	114.31	100	100	100	100	100	100	100	100	100	100	100	100	100	100	100	100	100	100	100	123.68	100	100	100	100	100	100	100	100	270.11	231.48	100	477.26	100	161.77	378.03	100	100	483.32
CSF3	100	100	100	100	100	100	100	100	100	100	100	100	100	100	100	100	100	100	100	100	100	100	100	100	100	100	100	100	100	100	100	100	100	100	100	100	100	100	100	100	100	100	100	100	100	100	100	100	100
CSF3R	100	100	100	100	100	100	100	100	100	100	100	100	100	100	100	100	100	100	100	100	100	100	100	100	100	100	100	100	100	100	100	100	100	100	100	100	100	100	100	100	100	100	100	100	100	100	100	100	100
CT45A1	100	100	100	100	100	100	100	100	100	100	100	100	100	100	100	100	100	100	100	100	100	100	100	100	235.14	100	100	100	100	100	100	100	100	100	100	100	100	100	100	100	176.26	100	100	100	100	636.28	100	100	100
CTAG1B	100	100	100	100	100	100	100	100	100	100	100	100	100	100	100	100	100	100	100	100	100	100	100	100	100	100	100	100	100	100	100	100	100	100	100	100	100	100	100	100	100	100	100	100	100	100	100	100	100
CTAGE1	100	100	100	100	100	100	100	100	100	100	100	100	100	100	100	100	100	100	100	100	100	100	100	100	100	100	100	100	100	100	100	100	100	100	100	100	100	100	100	100	100	100	100	100	100	100	100	100	100
CTCFL	100	100	100	100	100	100	100	100	100	100	100	100	100	100	100	100	100	100	100	100	100	100	100	100	100	100	100	100	100	100	100	100	100	100	100	100	100	100	100	100	100	100	100	100	100	100	100	100	100
CTLA4	100	100	100	100	100	100	100	100	100	100	100	100	100	100	100	100	100	100	100	100	100	100	100	100	100	100	100	100	100	100	100	100	100	100	100	100	100	100	100	100	100	100	100	100	100	100	100	100	100
CTSB	3776.79	2217.8	5405.25	5251.17	2280.1	4037.54	5095.31	8927.48	5417.18	3965.64	3044.89	6246.9	6156.92	7059.83	5082.84	7760.2	5047.43	3239.31	2800.93	7162.02	5117.98	5432.76	5337.32	8594.68	2281.08	9135.96	4136.35	7352.76	4260.62	4476.51	3283.49	7781.78	8732.53	3029.24	4430.01	3367.52	9734.35	4194.56	4445.56	3783.63	4335.91	5363.94	3765.84	3272.27	5760.66	11131.2	8215.53	6792.72	4276.73
CTSC	1804.88	992.72	2739.63	2205.84	1386.01	2250.78	2112.84	3553.15	3234.94	2097.96	1667.38	3325.84	2964.14	3085.52	2383.92	3109.91	2770.29	2069.33	1853.49	2630.53	2372.75	2294.69	2425.76	3588.21	2232.85	3120.41	3430.32	3577.6	1561.61	2086.94	2071.88	2944.6	3902.04	1624.38	2275.26	1907.27	4010.28	2385.21	2385.36	2887.34	3575.66	2797.53	3951.34	1632.41	4210.27	4861.96	3559.44	2886.08	3383.22
CTSG	100	100	100	100	100	100	100	100	100	100	100	100	100	100	100	100	100	100	100	100	100	100	100	100	100	100	100	100	100	100	100	100	100	100	100	100	100	100	100	100	100	100	100	100	100	100	100	100	100
CTSH	2097.94	1591.24	3638.45	1984.68	1606.43	2009.45	3624.74	2394.53	2581.93	1971.17	1798.71	2469.28	3121.7	3244.5	3028.11	5523.31	3407.32	2011.66	1729.42	2602.35	1917.74	1473.47	1464.87	2239.84	2132.36	4009.94	2865.6	3656.68	1892.32	2790.76	2370.68	3179.27	3816.91	1477.92	1649.7	1090.23	6381.15	1378.37	1481.01	1790.52	1556.93	2159.37	1511.02	2071.2	2376.42	5479.53	4001.09	2243.25	2162.21
CTSL	485.67	646.16	672.85	522.34	525.08	582.59	579.68	1195.31	728.49	599.57	439.76	841.61	557.13	718.5	636.8	1034.66	1136.93	492.79	517.73	641.09	563.35	663.69	681.69	789.81	454.21	632.27	631.28	819.53	626.44	776.82	500.18	793.51	780.43	644.78	634.59	528.93	913.42	445.83	579.19	480.88	499.39	555.37	443.04	464.81	691.45	1025.54	1051.74	553.36	604.15
CTSS	157.09	462.59	539.86	428.17	241.31	316.73	657.06	2213.32	543.97	539.07	964.74	300.12	722.44	846.38	213.71	785.97	120.85	142.12	204.3	461.48	525.81	100	744.24	1114.2	1111.4	460.77	109.57	100	1096.52	568.09	992.71	1056.22	1044.7	608.7	710.09	499.58	989.45	1467.54	1394.63	763.27	1145.67	536.39	1197.65	825.5	2509.55	2069.79	486.57	897.96	2209.91
CTSW	100	100	100	100	100	100	100	100	100	100	100	100	100	100	100	100	100	100	100	100	100	100	100	100	100	100	100	100	100	100	100	100	100	100	100	100	100	100	100	100	100	100	100	100	100	100	100	100	100
CX3CL1	432.3	894.96	437.58	488.89	510.4	536	607.74	546.81	459.62	721.08	365.13	444.3	517.81	568.74	390.04	618.14	548.59	367.44	612.25	100	100	494.29	439.1	366.69	464.26	372.45	562.67	381.17	506.74	509.31	378.7	440.88	507.82	478.95	492.71	520.06	524.54	100	490.28	423.59	286.71	436.36	322.37	383	470.99	464.11	557.68	334.67	100
CX3CR1	116.18	100	100	100	100	143.54	100	100	100	129.54	125.98	138.84	110.69	100	100	100	100	100	100	100	100	100	140.91	100	100	171.51	100	100	100	100	100	100	100	100	100	100	146.58	100	264.19	100	100	100	100	100	100	100	100	100	100
CXCL1	100	162.88	100	100	100	100	100	246.88	213.99	100	100	100	250	100	100	100	100	100	100	100	100	100	175.05	100	100	100	100	100	100	100	100	283.49	100	100	100	100	157.75	100	100	100	244.41	100	1082.39	100	227.62	100	100	100	100
CXCL10	100	344.73	498.26	100	100	100	100	1608.24	100	100	100	100	100	100	100	100	100	100	100	100	100	100	100	1052.8	100	100	100	100	100	100	100	100	100	100	100	100	441.72	100	100	100	118.68	100	307.97	100	100	100	100	100	391.11
CXCL11	100	100	100	100	100	100	100	100	100	100	100	100	100	100	100	100	100	100	100	100	100	100	100	100	100	100	100	100	100	100	100	100	100	100	100	100	100	100	100	100	100	100	100	100	100	100	100	100	100
CXCL12	1499.11	1403.96	2312.81	2214.07	2980.24	2606.58	2386.4	1808.79	2636.47	4581.19	3935.74	2890.08	2286.17	1975.55	1759.16	3405.11	3000.52	2869.24	2391.51	1063.64	2386.82	2086.98	2146.74	2504.29	3034.75	2138.72	1662.43	1731.12	923.9	2061.51	1659.26	1943.06	2496.52	2383.12	2141.15	4153.33	2016.77	2857.05	2161.81	1917.39	2415.89	2594.01	2222.41	2800.02	2374.99	2964.33	1369.88	2253.2	1882.39
CXCL13	100	100	100	100	100	100	100	100	100	100	100	100	100	100	100	100	100	100	100	100	100	100	100	100	100	100	100	100	100	100	100	100	100	100	100	100	100	100	100	100	100	100	100	100	100	100	100	100	100
CXCL14	4883.13	1530.3	5535.94	5863.37	2978.5	3318	3918.85	4454.48	4651.6	2853.36	3955.77	4281.72	8721.06	5847.29	6335.2	4594.24	7051.36	3407.95	4088.31	5224.77	3788.9	5798.26	4458.77	4609.76	2546.37	8755.83	3962.79	3996.97	1282.51	2641.05	4279.48	2433.81	5380.22	1914.96	2617.9	2706.2	5493.59	3860.18	2514.92	3986.21	3217.27	3839.27	2227.81	3718.49	4964.71	6014.76	4835.75	11077.1	5230.64
CXCL16	100	139.26	100	100	100	100	144.21	177.91	150.08	117.73	100	100	132.26	100	100	100.31	100	100	100	100	100	100	148.73	200.24	100	100	100	100	100	100	169.65	182.81	183.03	100	139.66	100	183.05	100	100	100	252.63	175.92	374.6	100	283.45	100	100	100	340.23
CXCL2	100	188.14	100	100	100	100	100	100	100	100	100	100	103.48	100	100	100	100	100	100	100	100	100	100	100	100	100	100	100	100	100	100	100	100	100	100	100	100	100	100	100	100	100	315.17	100	100	100	100	100	100
CXCL3	100	100	100	100	100	100	100	100	100	100	100	100	100	100	100	100	100	100	100	100	100	100	100	100	100	100	100	100	100	100	100	100	100	100	100	100	100	100	100	100	100	100	100	100	100	100	100	100	100
CXCL5	100	100	100	100	100	100	100	100	100	100	100	100	100	100	100	100	100	100	100	100	100	100	100	100	100	100	100	100	100	100	100	100	100	100	100	100	100	100	100	100	100	100	100	100	100	100	100	100	100
CXCL6	100	100	100	100	100	100	100	100	100	100	100	100	100	100	100	100	100	100	100	100	100	100	100	100	100	100	100	100	100	100	100	100	100	100	100	100	100	100	100	100	156.28	100	740.2	100	153.18	100	100	100	100
CXCL9	100	100	293.71	196.26	100	100	100	1717.63	100	135.8	283.25	100	109.04	100	100	100	100	100	100	100	100	100	100	100	100	177.91	100	100	243.04	100	118.21	100	100	100	100	100	100	821.08	381.05	100	100	100	207.11	100	178.95	100	100	100	397.47
CXCR1	100	100	100	100	100	100	100	100	100	100	100	100	100	100	100	100	100	100	100	100	100	100	100	100	100	100	100	100	100	100	100	100	100	100	100	100	100	100	100	100	100	100	100	100	100	100	100	100	100
CXCR2	100	100	100	100	100	100	100	100	100	100	100	100	100	100	100	100	100	100	100	100	100	100	100	100	100	100	100	100	100	100	100	100	100	100	100	100	100	100	100	100	100	100	100	100	100	100	100	100	100
CXCR3	100	100	100	100	100	100	100	100	100	100	100	100	100	100	100	100	100	100	100	100	100	100	100	100	100	100	100	100	100	100	100	100	100	100	100	100	100	100	100	100	100	100	100	100	100	100	100	100	100
CXCR4	100	148.2	144.71	176.2	100	100	100	213.95	100	135.88	416.85	139.91	184	100	100	117.19	100	120.37	110.28	100	100	100	143.43	326.43	259.26	197.11	139.77	100	431.94	100	198.1	336.52	281.78	212.48	201.15	297.69	180.86	538.72	307.38	726.44	313.74	234.56	471.86	100	781.64	381.77	100	100	655.02
CXCR5	100	100	100	100	100	100	100	100	100	100	100	100	100	100	100	100	100	100	100	100	100	100	100	100	100	100	100	100	100	100	100	100	100	100	100	100	100	100	100	100	100	100	100	100	100	100	100	100	100
CXCR6	100	100	100	100	100	100	100	100	100	100	100	100	100	100	100	100	100	100	100	100	100	100	100	100	100	100	100	100	100	100	100	100	100	100	100	100	100	100	100	100	100	100	100	100	100	100	100	100	100
CYBB	150.42	212.94	306.29	246.19	179.3	196.52	347.68	1072.2	455.7	369.54	437.51	129.23	475.93	449.8	205.92	388.51	100	129.11	144.59	100	100	100	342.06	493.58	405.97	317.42	100	100	544.4	100	583.37	395.33	418.03	472.19	305.55	225.85	570.42	553.58	640.16	403.12	763.78	267.33	545.7	461.09	599.83	602.6	100	384.37	1020.69
CYFIP2	1771.94	2905.39	2095.81	2824.45	2361.67	2140.35	3286.9	613.21	952.89	2058.42	1316.86	2896.49	1369.72	1507.98	1959.85	1906.78	3280.89	2344.16	2473.04	928.88	1352.66	1870.81	813.54	1763.13	1493.26	1941.62	3629.48	3268.45	1197.93	3805.64	2567.69	959.98	1435.4	2622.75	2642.83	2580.64	1008.63	787.64	919.6	1323.96	764.95	1522.95	543.9	1457.65	846.06	726.11	1339.94	1030.51	632.76
CYLD	346.68	351.16	422.03	440.03	391.91	419.52	408.14	572.81	575.27	511.02	577.03	230.69	457.35	100	390.69	377.49	316.98	335.66	336.59	100	400.2	446.83	374.71	541.82	319.55	262.38	307.7	334.67	475.06	100	397.3	409.36	483.83	366.23	344.19	404.48	512.27	471.84	401.37	429.73	386.59	351.85	516.88	100	324.97	471.6	100	100	540.55
DDX43	100	100	100	100	100	100	100	100	100	100	100	100	100	100	100	100	100	100	100	100	100	100	100	100	100	100	100	100	100	100	100	100	100	100	100	100	100	100	100	100	100	100	100	100	100	100	100	100	100
DDX58	100	1021.68	702.76	355.94	277.76	100	552.63	695.11	224	482.36	256.14	124.96	369.08	326.9	106.73	398.03	100	100	176.07	100	100	100	276.88	729.65	100	300.78	100	100	100	482.29	498	247.84	100	281.1	100	100	273	750.49	353.1	650.73	618.07	577.79	547.5	1108.11	575.49	524	505.28	732.29	1475.39
DEFB1	267.11	226.33	368.61	362.89	480.41	343.46	295.34	100	100	394.36	211.07	676.06	157.36	654.69	446.59	363.55	440.9	596.82	294.57	100	435.79	425.29	199.74	260.1	100	290.54	442.36	412.82	431.8	100	261.58	100	100	312.54	236.52	244.79	238.6	100	520.77	304.9	100	315.63	100	100	100	100	557.68	100	100
DKK1	100	100	100	100	100	100	100	100	100	100	100	100	100	100	100	100	100	100	100	100	100	100	100	100	100	100	100	100	100	100	100	100	100	100	100	100	100	100	100	100	100	100	100	100	100	100	100	100	100
DMBT1	100	100	100	100	100	100	100	100	100	100	100	100	100	100	100	100	100	100	100	100	100	100	100	100	100	100	100	100	100	100	100	100	100	100	100	100	100	100	100	100	100	100	100	100	100	100	100	100	100
DOCK9	326.46	466.91	443.18	320.01	397.59	362.35	309.67	296.99	418.32	358.36	402.72	325.75	286.13	100	288.6	272.79	360.61	364.03	336.94	100	381.3	100	370.41	403.14	337.64	307.18	322.04	358.65	347.77	452.09	322.88	629.72	389.11	497.53	585.99	440.01	257.82	100	271.81	302.85	445.34	277.68	313.37	100	492.46	100	100	100	327.51
DPP4	1355.03	372.46	1091.01	895.08	716.31	1211.9	879.86	1221.53	581.91	840.68	912.15	841.61	832.76	1640.83	1069.48	1557.3	1253.31	854.58	643.99	1128.54	606.01	1521.87	838.25	864.67	255.24	396.77	521.72	1570.97	100	100	362.28	498.58	994.74	100	596.32	441.42	741.26	434.69	520.77	370.38	351.34	676.1	180.1	100	489.6	613.83	916.99	563.3	100
DUSP4	100	100	100	100	100	100	100	100	100	100	100	100	100	100	100	100	100	100	100	100	100	100	100	100	100	100	100	100	100	100	100	100	100	100	100	100	100	100	100	100	100	100	100	100	100	100	100	100	100
DUSP6	360.94	526.36	354.77	325.51	295.9	262.92	325.76	679.92	646.14	407.83	424.3	274.48	402.79	482.1	268.03	352.22	366.15	305.38	226.76	100	292.05	100	383.49	345.36	522.54	253.42	214.52	100	384.17	100	318.5	504.75	450.92	367.35	321.27	331.25	507.37	423.54	403.91	415.4	485.29	348.4	549.3	100	512.5	606.34	100	374.43	572.35
EBI3	100	100	100	100	100	100	100	100	100	100	100	100	100	100	100	100	100	100	100	100	100	100	100	100	100	100	100	100	100	100	100	100	100	100	100	100	100	100	100	100	100	100	100	100	100	100	100	100	100
ECSIT	302.26	100	269.96	100	248.43	100	291.1	100	100	207.15	100	291.57	193.16	100	275.86	252.7	370.01	241.28	257.87	100	100	100	214.29	100	100	293.1	290.81	367.93	100	100	261.58	100	100	100	100	100	249.5	100	100	302.85	211.51	227.67	223.32	100	161.77	100	100	371.11	100
EGR1	100	228.97	100	100	100	100	100	100	100	100	100	100	180.05	100	100	100	100	100	100	100	100	100	100	100	100	100	100	100	100	100	100	100	100	100	100	100	100	100	100	100	100	100	100	100	100	100	100	100	100
EGR2	100	100	100	100	100	100	100	100	100	100	100	100	100	100	100	100	100	100	100	100	100	100	100	100	100	100	100	100	100	100	100	100	100	100	100	100	100	100	100	100	100	100	100	100	100	100	100	100	100
ELANE	100	100	100	100	100	100	100	100	100	100	100	100	100	100	100	100	100	100	100	100	100	100	100	100	100	100	100	100	100	100	100	100	100	100	100	100	100	100	100	100	100	100	100	100	100	100	100	100	100
ELK1	100	100	100	100	100	100	100	100	100	100	100	107.87	100	100	100	100	100	100	100	100	100	100	100	100	100	140.79	100	100	100	100	100	100	100	100	100	100	100	100	100	100	119.85	100	100	100	100	100	100	100	100
ENG	1226.81	964.77	722.27	909.47	1596.05	1312.42	1126	1087.29	1239.21	1713.98	1142.95	2539.77	984.5	807.62	1014.55	1490.8	1034.31	820.47	1160.19	1635.44	1602.1	1080.16	1305.03	1177.17	2226.82	1840.5	765.93	1095.61	1365.04	816.36	2184.61	1388.73	1137.51	1869.19	1273.31	1343.27	1568.15	3031.67	2639.39	1677.97	2187.93	2571.59	2715.87	1881.55	1581.89	2432.85	2084.76	2147.16	2168.57
ENTPD1	100	100	100	100	100	100	100	100	100	100	100	100	100	100	100	100	100	100	100	100	100	100	100	100	100	100	100	100	100	100	110.54	100	100	100	100	100	100	100	100	100	100	100	100	100	100	100	100	100	100
EOMES	100	100	100	100	100	100	100	100	100	100	100	100	100	100	100	100	100	100	100	100	100	100	100	100	100	100	100	100	100	100	100	100	100	100	100	100	100	100	100	100	100	100	100	100	100	100	100	100	100
EP300	855.69	820.08	782.99	798.02	943.66	1054.16	764.27	764.91	880.82	858.96	847.09	754.03	749.29	829.19	667.23	675.87	808.5	671.28	867.78	726.76	646.02	794.72	679.65	750.92	850.13	833.22	721.39	691.45	738.26	723.08	846.05	675.04	655.02	790.03	749.61	750.36	765.23	954.83	896.73	931.07	807.25	736.46	754.61	728.82	891.87	655	632.54	765.42	931.66
EPCAM	1015.72	1344.3	1088.16	1047.23	1186.08	1221.69	1230.1	884.09	1127.17	1082.75	881.98	1344.65	1019.57	1140.19	1202.79	1246.77	1255.16	1231.85	1160.78	1098.63	1413.53	977.21	1039.99	870.8	1328.46	1073.84	1187.3	1102.14	827.33	1145.88	1095.59	1055.42	1061.55	1222.16	1247.65	993.13	1363.46	795.07	1171.09	986.32	699.15	1324.6	995.94	1186.2	1040.76	1403.57	1437.25	904.59	737.7
ETS1	638.34	419.37	409.43	517.06	570.09	718.42	535.1	742.79	833.6	656.9	743.79	779.66	514.17	977.96	417.12	921.37	743.97	424.2	472.56	866.56	620.64	582.44	724.76	573.2	962.68	515.8	415.22	484.92	857.62	440.96	557.1	762.95	694.32	929.34	836.13	559.96	866.81	765.35	792.58	583.2	609.85	760.61	725.79	539.18	760.17	946.94	651.25	503.66	537.37
EWSR1	938.55	901.56	911.93	905.54	920.24	951.36	918.42	846.34	991.44	1022.81	915.57	843.74	830.65	723.07	837.18	699.08	706.26	926.27	962.07	1011.96	941.75	980.13	804.33	911.76	627.05	1099.44	815.6	736.95	847.18	767.62	986.14	749.38	712.2	866.02	767.43	778.96	831.11	1140.59	1173.63	1053.85	952.96	1083.14	1154.43	1152.73	808.84	924.48	733.6	1100.09	1182.86
F12	100	100	100	100	100	100	100	100	100	100	100	100	100	100	100	100	100	100	100	100	100	100	100	100	100	100	100	100	100	100	100	100	100	100	100	100	100	100	100	100	100	100	100	100	100	100	100	100	100
F13A1	498.28	211.5	707.3	738.66	253.61	799.7	665.6	2777.83	1702.97	450.42	893.54	424.01	1373.19	1245.94	841.6	1013.94	568.72	288.05	320.11	758.15	669.71	436.94	913.42	877.15	621.02	688.59	147.96	804.91	699.66	380.91	1012.41	1507.35	1678.86	709.56	1427.86	618.34	1418.42	1144.31	934.84	407.22	1292.55	1021.05	1660.5	754.85	1453.05	1418.54	426.68	1146.48	1138.34
F2RL1	242.25	218.51	329.87	224.52	211.59	302.61	243.63	228.62	350.37	226.56	249.88	302.25	269.08	334.93	300.53	296.32	275.72	225.5	192.25	458.68	273.22	100	309	286.63	313.52	289.26	239.61	286.6	196.72	300.71	348.05	340.77	306.72	195.76	243.08	199.24	334.25	100	317.54	372.43	318.44	357.02	405.22	386.72	350.74	400.48	385.51	397.62	337.05
FADD	100	100	100	100	100	100	100	100	100	100	100	100	100	100	100	100	100	100	100	100	100	100	100	100	100	100	100	100	100	100	100	100	100	100	100	100	100	100	100	100	122.2	100	100	100	100	100	100	100	100
FAS	100	100	100	100	100	100	100	100	100	100	100	100	100	100	100	100	100	100	100	100	100	100	100	100	100	100	100	100	100	100	100	100	100	100	100	100	100	100	100	100	100	100	100	100	100	100	100	100	100
FCER1A	100	100	100	100	100	100	100	100	100	100	190.88	100	100	100	100	100	100	100	101.76	100	324.21	100	107.81	100	297.45	100	100	100	100	100	100	100	100	100	122.76	100	100	100	100	100	100	100	100	100	100	100	100	100	100
FCER1G	100	100	298.13	260.11	100	100	266.88	1308.46	257.37	295.37	444.95	100	539	641.53	129.78	229.93	100	100	158.7	100	369.66	100	236.68	575.34	100	203.5	100	100	590.12	100	342.58	370.18	100	280.59	100	100	268.84	505.28	528.39	274.21	424.19	227.67	475.46	100	357.89	501.54	100	377.74	1065.21
FCER2	100	100	100	100	100	100	100	100	100	100	100	100	100	100	100	100	100	100	100	100	100	100	100	100	100	100	100	100	100	100	100	100	100	100	100	100	100	100	100	100	100	100	100	100	100	100	100	100	100
FCGR1A	100	100	100	100	100	100	100	100	100	100	100	100	100	100	100	100	100	100	100	100	100	100	100	100	100	100	100	100	100	100	100	100	100	100	100	100	100	100	100	100	100	100	100	100	100	100	100	100	100
FCGR2A	140.79	283.05	268.31	197.2	123.09	177.6	224.98	654.03	304.87	224.98	215.54	112.14	277.39	476.3	119.51	202.54	123.12	100	114.08	100	100	100	219.85	510.08	335.63	179.19	106.49	100	407.73	262.63	341.48	501.41	366.92	338.1	385.12	162.01	451.21	375.24	330.24	263.97	417.14	100	639.35	100	659.96	512.77	100	100	807.65
FCGR2B	100	100	100	100	100	100	100	100	100	100	100	100	107.95	100	100	100	100	100	100	100	100	100	100	100	100	100	100	100	100	100	100	100	100	100	100	100	100	100	100	100	100	100	100	100	393.68	100	100	100	100
FCGR3A	100	100	232.52	100	100	100	271.43	1523.36	232.74	151.91	100	100	311.54	100	100	184.64	100	100	100	100	100	100	100	480.47	100	145.91	100	100	315.81	100	280.19	281.13	286.65	100	100	100	336.58	386.39	533.47	214.86	377.19	100	298.96	100	495.33	100	100	100	953.92
FEZ1	100	100	100	100	100	100	100	100	181.32	152.64	152.85	119.62	109.99	100	100	146.54	100	100	100	100	100	100	100	100	100	100	100	100	100	100	100	100	100	100	100	100	100	100	100	100	193.88	100	252.14	100	100	100	100	100	100
FLT3	100	100	100	100	100	100	100	100	100	100	100	100	100	100	100	100	100	100	100	100	100	100	100	100	100	100	100	100	100	100	100	100	100	100	100	100	100	100	100	100	100	100	100	100	100	100	100	100	100
FLT3LG	100	222.25	191.27	100	290.62	100	100	100	100	356.37	333.46	100	228.87	100	100	100	100	100	100	100	100	100	100	100	100	100	100	100	100	100	166.36	100	100	100	100	100	100	100	100	100	178.61	100	270.15	100	100	100	100	100	100
FN1	579.6	1642.4	731.53	499	685.92	994.86	678.5	1792.58	1657.98	1279.82	984.28	1148.13	1483.72	543.3	523.58	1079.22	986.47	821.26	618.84	957.14	1041.8	913.19	1732.83	2990.68	1491.25	743.62	722.42	245.52	861.08	451.26	574.61	1409.5	2021.87	1792.83	1354.34	1603.95	1747.91	1508.41	858.63	736.67	1753.16	1119.36	2582.6	840.38	2176	1122.85	524	516.91	826.73
FOS	100	269.33	100	100	100	100	100	273.49	100	100	100	100	217.97	100	100	100	100	100	100	100	100	100	100	198.39	397.93	100	100	100	100	100	218.9	205.71	200.74	100	100	236.78	165.52	100	100	223.05	262.03	100	253.94	100	200.42	100	100	100	426.08
FOXJ1	100	100	100	100	100	100	100	100	100	100	100	100	129.9	100	100	100	100	100	100	100	100	100	100	100	100	100	100	100	100	100	100	100	100	100	100	235.64	100	100	100	100	100	100	100	100	100	100	100	100	100
FOXP3	100	100	100	100	100	100	100	100	100	100	100	100	100	100	100	100	100	100	100	100	100	100	100	100	100	100	100	100	100	100	100	100	100	100	100	100	100	100	100	100	100	100	100	100	100	100	100	100	100
FPR2	100	100	100	100	100	100	100	100	100	100	100	100	100	100	100	100	100	100	100	100	100	100	100	100	100	100	100	100	100	100	100	100	100	100	100	100	100	100	100	100	100	100	100	100	100	100	100	100	100
FUT5	100	100	100	100	100	100	100	100	100	100	100	100	100	100	100	100	100	100	100	100	100	100	100	100	100	100	100	100	100	100	100	100	100	100	100	100	100	100	100	100	100	100	100	100	100	100	100	100	100
FUT7	100	100	100	100	100	100	100	100	100	100	100	100	100	100	100	100	100	100	100	100	100	100	100	100	100	100	100	100	100	100	100	100	100	100	100	100	100	100	100	100	100	100	100	100	100	100	100	100	100
FYN	286.11	191.41	263.23	291.55	312.37	306.14	209.05	424.37	291.45	330.83	473.52	200.79	220.89	100	187.79	314.15	183.04	189.56	198.39	100	297.82	335.57	234.93	293.5	100	262.38	195.07	100	342.55	100	270.34	214.31	274	292.81	270.03	341.69	261.28	423.54	403.91	288.53	272.61	279.41	410.62	100	183.24	100	100	100	464.24
GAGE1	100	100	100	100	100	100	100	100	100	100	100	100	100	100	100	100	100	100	100	100	100	100	100	100	100	100	100	100	100	100	100	100	100	100	100	100	100	100	100	100	100	100	100	100	100	100	100	100	100
GATA3	100	100	100	100	100	100	100	100	100	100	100	100	100	100	100	100	100	100	100	100	100	100	100	100	100	100	100	100	100	100	100	100	100	100	100	100	100	100	100	100	100	100	100	100	100	100	100	100	100
GNLY	100	100	100	100	100	100	100	100	100	100	100	100	100	100	100	100	100	100	100	100	100	100	100	100	100	100	100	100	100	100	100	100	100	100	100	100	100	100	100	100	100	100	100	100	100	100	100	100	100
GPI	1110.44	1191.32	1303.37	1286.74	1131.51	1096.31	1143.26	1011.32	980.5	1210.88	858.85	1374.55	1192.84	1327.79	1427.38	1056.31	980.59	1562.85	1306.91	1148.57	1483.04	1352.78	944.01	1251.19	852.14	1675.4	1347.04	1338.3	936.89	1286.71	1601.25	1323.12	959.8	950.45	1061.47	1239.98	1201.97	1233.47	1397.17	1354.66	1132.74	1388.42	1442.58	1509.7	1009.26	1175.25	1388.59	1577.24	1338.66
GTF3C1	738.41	572.56	611.33	506.64	546.77	639.39	509.77	467.41	799.03	540.62	483.19	433.62	536.44	413.03	470.87	486.6	573.51	501.69	568.77	703.21	567.8	544.05	393.56	628.12	339.65	606.67	530.42	542.56	501.8	547.49	504.56	458.22	423.63	465.79	461.09	485.19	508.69	553.58	525.85	419.49	548.75	479.48	659.16	583.8	397.98	422.94	598.85	573.24	578.71
GZMA	100	100	257.43	100	100	100	100	1036.39	100	100	366.05	100	214.81	100	100	280.04	100	100	100	100	100	100	100	100	100	177.91	100	100	100	100	144.47	100	100	100	100	100	100	100	100	100	158.63	100	189.1	100	206.15	100	100	100	100
GZMB	100	100	100	100	100	100	100	346.28	100	100	100	100	100	100	100	100	100	100	100	100	100	100	100	100	100	100	100	100	100	100	100	100	100	100	100	100	100	100	100	100	100	100	100	100	100	100	100	100	100
GZMH	100	100	100	100	100	100	100	100	100	100	100	100	100	100	100	100	100	100	100	100	100	100	100	100	100	100	100	100	100	100	100	100	100	100	100	100	100	100	100	100	100	100	100	100	100	100	100	100	100
GZMK	100	100	100	100	100	100	100	135.46	100	100	138.6	100	100	100	100	100	100	100	100	100	100	100	100	100	100	100	100	100	100	100	153.23	100	100	100	100	100	100	100	100	100	121.03	100	100	100	181.81	100	100	100	100
GZMM	100	100	100	100	100	100	100	100	100	100	100	100	100	100	100	100	100	100	100	100	100	100	100	100	100	100	100	100	100	100	100	100	100	100	100	100	100	100	100	100	100	100	100	100	100	100	100	100	100
HAMP	100	100	100	100	100	100	100	100	100	100	100	100	100	100	100	100	100	100	100	100	100	100	100	100	100	100	100	100	100	100	100	100	100	100	100	100	100	100	100	100	100	100	100	100	100	100	100	100	100
HAVCR2	100	100	172.52	100	100	100	100	336.82	359.08	100	100	100	415.46	100	124.84	317.87	213.11	100	100	100	100	100	162.27	289.56	100	367.33	100	100	100	100	268.15	285.02	282.54	100	100	100	515.18	100	100	444.05	312.56	307	693.38	100	314.95	437.91	100	337.98	343.41
HCK	100	100	100	100	100	100	100	268.53	100	100	153.62	100	140.02	100	100	100	100	100	100	100	100	100	100	171.53	100	100	100	100	100	100	165.27	100	100	100	100	100	100	100	383.59	100	244.41	100	291.76	100	211.87	100	100	100	531.01
HLA-A	2003.4	5115.32	6028.24	3482.63	2783.35	2928.16	4968.65	6863.54	3745.57	3640.08	4450.52	2440.44	7238.49	3855.24	2124.79	4326.38	1836.98	1724.03	1539.17	4024.77	3120.45	2501.8	4298.76	7017.52	2717.2	6448.16	1660.38	1835.71	5367.44	6661.52	8079.57	4290.25	4095.9	3490.21	2331.95	2955.53	3977.29	10785.5	7747.97	10292.9	10284	7714.76	7394.81	10575.4	11117.6	9693.97	9753.83	10493.9	10330.9
HLA-B	2135.61	5517.87	9571.53	5440.77	4155.67	2848.16	8537.53	14771.5	3931.83	6244.86	7602.3	2139.26	10658.3	7563.66	2938.94	7413.61	1524.15	1829.41	2766.15	5316.67	5891.29	3773.43	6521.87	10037	2562.45	3276.56	1659.35	2856.52	8677.64	9135.98	6157.63	6025.58	6725.46	5280.69	3172.39	3762.61	6192.67	8296.23	5342.29	6689.39	8066.67	5889.99	5147.19	7700.98	8719.73	7889.92	7118.88	8585.34	7609.07
HLA-C	1439.04	1613.26	3287.61	1546.98	3151.86	810.41	2666.84	7412.18	1323.26	2205.03	2401.91	2655.12	3460.23	1297.91	2382.86	2520.81	979.26	845.01	2139.48	3187.53	3486.98	1590.06	1759.08	5779.54	2178.59	2619.97	1869.27	2033.01	3763	3712.67	6495.83	2661.27	3639.35	1825.05	2023.33	2863.16	4379.2	5297.99	3061.08	2095.42	5988.02	3680.6	4781.59	4287.41	6190.14	4753.42	4712.23	2336.03	4159.07
HLA-DMA	416.79	399.83	455.55	334.39	317.17	407.78	517.12	696.68	655.32	426.14	654.59	217.88	615.01	449.85	292.34	334.96	242.14	232.37	266	696.82	463.97	100	477.2	634.39	438.13	305.9	151.55	100	509.44	100	553.81	550.51	600.57	528.27	436.87	382.64	617.68	568.44	480.12	452.23	561.67	338.05	779.82	483.4	602.69	699.91	100	473.83	845.81
HLA-DMB	267.89	540.59	331.99	238.74	249.9	349.01	557.52	705.45	483.42	370.96	567.65	263.8	481.67	747.25	234.68	430.79	224.58	100	243.21	100	689.23	100	448.44	575.59	681.31	268.78	131.58	100	577.84	416.44	552.72	583.05	619.07	582.73	634.48	455.4	663.77	579.58	442.02	437.91	444.17	260.44	455.65	446.22	760.17	692.43	100	410.88	674.1
HLA-DOB	100	100	100	100	100	100	100	100	100	100	100	100	100	100	100	100	100	100	100	100	100	100	100	100	100	100	100	100	100	100	100	100	100	100	100	100	100	100	100	100	100	100	100	100	177.52	100	100	100	100
HLA-DPA1	502.87	983.88	891.01	949.61	797.14	781.86	1409.17	1917.85	888.85	1098.29	2256.81	1201.53	1297.38	1587.51	894.49	1500.02	721.51	638.18	1062.14	935.79	1807.35	631.98	1537.03	1455.11	1718.35	1036.72	522.74	592.47	1296.87	1271.97	1866.12	1356.91	2069.62	1507.04	2130.49	1151.55	2147.16	2667.57	1318.43	1168.44	1591.01	665.75	1797.38	1390.71	3281.17	1583.22	557.68	1623.63	2445.21
HLA-DPB1	828.44	1090.41	1137.96	1474.07	1119.76	1466.72	1347.78	2871.55	1352.46	1742.42	2678.86	1092.59	1819.33	4549.44	926.5	1869.52	942.11	646.01	889.29	1337.04	1989.96	770.57	1822.89	1251.8	2363.48	936.89	427	627.67	1347.03	1284.23	1698.66	1863.41	1811.08	1652.9	2217.49	1031.54	2352.35	2102.85	1740.12	1088.64	1338.37	603.66	1701.92	1152.73	2652.71	1979.97	759.8	1004	1748.85
HLA-DQA1	100	405.44	1371.74	753.79	720.48	100	565.59	1546.84	100	100	2865.39	532.95	100	100	504.86	100	279.15	285.92	463.27	966.36	100	476.02	1754.9	100	100	668.11	188.92	352.6	1331.88	676.89	870.12	755.82	887.47	1105.05	633.57	100	2075.47	1233.47	100	100	100	1410.84	1534.43	717.67	1921.18	100	561.43	1076.89	3602.62
HLA-DQB1	100	100	282.43	100	100	100	100	221	100	100	783.37	100	100	100	169.76	100	100	100	100	100	100	100	298.32	100	100	136.95	100	100	500.15	100	140.1	100	100	239.58	100	100	218.36	100	100	100	100	386.34	100	100	409.43	100	100	100	550.09
HLA-DRA	2309.85	2859.84	3028.82	2795.46	1978.06	3550.98	4416.27	7239.52	3562.21	3727.7	4733.8	3207.29	4544.27	4937.92	2083.53	4884.41	2530.8	1511.56	1728.89	3261.41	4402.72	1972.8	5132.52	5086.75	5967	3288.08	1089.51	1587.15	3848.16	3236.61	4894.59	5016.72	5763.04	3470.35	4911.31	2426.49	6680.12	6148.79	5314.35	3566.72	4878.78	2844.1	6013.46	4573.74	8464.91	6987.9	2691.1	4320.83	7087.6
HLA-DRB3	1872.51	1724.36	3500.23	3010.86	2306.3	2627.79	4062.95	5645.96	2692.15	2600.46	4810.01	1928.86	3859.4	3487.49	1722.1	2293.04	1262.08	1794	1874.36	5402.1	4464.9	2980.04	3853.81	5466.14	3302.05	3634.93	998.38	1675.69	4900.13	3164.49	4291.52	3150.17	3917.47	3123.67	2630.46	2020.56	4863.04	8504.28	6752.17	3734.52	6562.61	3359.79	7951.31	4926.99	5568.83	6082.13	3143.98	6113.45	10604.4
HLA-DRB4	764.66	100	100	100	100	100	100	738.32	100	655.69	100	414.39	758.82	100	100	539.92	100	100	100	100	757.89	100	100	812.45	100	767.94	189.44	100	100	638.03	818.68	100	100	100	454.28	399.03	100	100	100	100	708.55	100	100	405.31	100	692.43	411.71	100	100
HLA-E	2557.35	3111.18	5059.43	3536.16	2973.07	3008.55	3194.35	6931.41	3235.23	3755.22	3461.62	1653.31	3873.06	4033.16	1990.43	3680.41	1863.35	1647.08	2116.22	3827.54	2768.96	2517.68	2888.4	4375.55	1716.34	2938.66	1642.97	1995.95	4842.76	4106.91	4236.79	2765.02	3124.5	2735.1	2238.36	2272.92	3690.61	4707.26	4791.04	4049.65	3750.74	3768.56	3747.83	4651.82	3726.39	4199.47	4072.21	4075.63	5011.24
HLA-G	204.28	720.26	558.62	300.22	229.75	100	824.73	895.74	501.66	437.6	331.97	285.16	536.79	825.94	213.46	821.98	499.34	100	100	100	400.37	100	868.97	1004.31	558.71	339.17	254.97	100	780.12	873.02	629.34	897.41	1462.48	412.64	538.5	434.94	1253.27	100	289.6	368.34	803.73	222.49	444.84	561.49	1299.87	538.97	647.51	384.37	330.69
HMGB1	550.22	714.47	699.98	565.63	625.14	595.48	821.09	687.38	615.04	908.45	740.6	1143.86	752.82	641.33	700.11	884.95	730.42	626.69	630.68	803.27	827.39	762.75	920.34	853.28	1352.57	915.13	785.39	769.54	984.23	719.41	931.42	793.62	1038.49	842.22	913.63	857.65	991.27	973.4	858.63	1078.41	1196.19	798.55	1022.95	937.06	1274.1	1201.45	1081.68	990.74	839.45
HRAS	100	100	100	100	100	100	100	100	100	100	100	100	100	100	100	100	100	100	100	100	100	100	100	100	100	100	100	100	100	100	100	100	100	100	100	100	100	100	100	100	100	100	100	100	100	100	100	100	100
HSD11B1	100	100	100	100	100	100	100	100	100	100	100	100	100	100	100	100	100	100	100	100	100	100	100	100	100	100	100	100	100	100	100	100	100	100	100	100	100	100	100	100	100	100	100	100	100	100	100	100	100
ICAM1	100	408.9	335.56	100	100	100	100	1093.88	680.99	333.36	389.81	115.35	491.3	100	320.76	451.83	100	100	100	100	100	100	100	386.05	100	258.54	100	100	100	100	353.52	623.05	495.55	100	328.84	100	500.54	100	398.83	280.34	277.31	288.03	639.35	100	220.46	100	100	100	559.63
ICAM2	100	205.03	194.13	175.16	189.04	100	204.91	319.87	161.2	233.57	231.18	166.61	169.91	100	109.62	304.57	110.83	139.86	166.53	100	100	100	175.38	224.92	100	130.55	133.12	100	247.18	100	168.55	100	100	230.06	234.04	224.74	189.81	100	100	233.28	184.48	189.72	100	100	143.16	100	100	100	100
ICAM3	252.6	100	279.73	231.7	100	100	100	344.26	245.63	188.53	381.57	201.86	290.51	100	171.71	295.01	271.36	183.72	200.04	100	100	100	176.74	344.16	100	226.54	217.59	288.1	272.08	100	170.74	100	323.29	100	100	268.31	252.69	404.97	100	270.11	238.53	182.82	255.74	100	289.18	100	100	100	100
ICAM4	100	100	100	100	100	100	100	100	100	100	100	100	100	100	100	100	100	100	100	100	100	100	100	100	100	100	100	100	100	100	100	100	100	100	100	100	100	100	100	100	100	100	100	100	100	100	100	100	100
ICOS	100	100	100	100	100	100	100	100	100	100	100	100	100	100	100	100	100	100	100	100	100	100	100	100	100	100	100	100	100	100	100	100	100	100	100	100	100	100	100	100	100	100	100	100	100	100	100	100	100
ICOSLG	228.45	172.98	165.13	164.67	156.93	191.14	100	100	100	151.54	187.75	183.7	156.3	100	142.11	164.07	160.82	126.95	155.36	100	100	100	141.85	168.35	100	206.06	172.54	100	100	100	186.06	100	100	100	100	230.11	180.93	100	100	210.77	227.96	381.17	100	100	100	445.4	100	100	100
IDO1	100	100	100	100	100	100	100	100	100	100	100	100	100	100	100	100	100	100	100	100	100	100	100	100	100	100	100	100	100	100	100	100	100	100	100	100	100	100	100	100	100	100	100	100	100	100	100	100	100
IFI16	121.19	546.53	308.61	285.65	217.48	195.26	259.97	743.56	275.68	395.68	383.86	138.84	383.57	329.07	121.86	376.5	105.54	113.11	144.8	100	100	100	357.75	444.47	263.28	206.06	100	100	331.83	224.5	364.47	281.32	285.34	268.99	267.49	162.18	324.05	486.7	315	409.26	499.39	346.67	770.82	100	555.45	662.48	100	387.68	915.76
IFI27	572.83	1999.41	4105.12	1903.14	1629.62	463.21	3765.89	6707.64	1041.21	2579.51	1471.27	686.74	2292.28	2561.39	326.04	3282.11	265.1	412.3	795.46	1161.38	505.1	694.24	3593.56	5831.43	520.53	2035.05	361.98	646.21	2988.66	3268.94	4417.39	1644.2	1771.36	1957.23	618.69	962.82	1809.1	6148.79	2367.58	5344.96	5547.38	3565.04	2200.79	3993.65	7354.01	11340.8	4648.6	10692.7	8404
IFI30	705.8	780.11	1451.61	1134.58	821.19	819.92	898.42	4215.22	1157.77	869.59	991.83	319.34	1669.05	1281.15	640.41	1349.09	564.74	720.19	576.7	917.03	875.14	877.6	874.86	1983.73	341.66	721.87	653.3	536.64	1173.7	824.7	751.92	1280.97	1401.31	529.34	598.81	536.6	1267.91	988.27	1219.35	816.48	869.53	683	909.49	669.33	814.57	1366.14	688.68	705.78	1758.39
IFI35	100	421.16	701.36	315.23	236.75	100	416.36	893.46	231.44	403.79	289.05	100	462.2	432.87	155.18	479.78	100	100	100	100	100	100	276.7	704.12	100	171.51	118.78	100	100	429.31	224.37	100	100	280.56	100	100	289.51	100	100	319.22	357.21	227.67	225.12	524.31	261.98	467.86	374.28	420.82	731.34
IFIH1	100	699.97	573.69	328.64	300.94	100	503.09	772.11	100	407	305.53	137.78	403.73	100	100	428.62	100	100	100	100	100	100	277.19	597.6	100	211.18	108.54	100	100	100	323.97	100	100	100	100	100	100	497.85	100	474.74	453.57	355.3	311.57	591.24	387.96	441.66	460.37	497.03	1074.75
IFIT1	214.16	2855.49	2188.35	995.83	620.63	283.24	1807.74	2390.79	228.4	1229.86	474.84	267.01	1295.12	638.91	215.1	1505.39	267.55	194.79	252.76	100	100	263.23	686.16	2086.9	213.04	454.37	231.42	287.75	361.98	1705.47	980.67	203.39	480.24	616.17	204.97	216.57	531.63	1125.73	401.37	1375.12	1132.74	1143.5	471.86	2019.14	1444.46	1036.77	1601.93	1507.65	2699.58
IFIT2	100	777.23	754.11	100	216.95	100	470.72	344.07	239.37	197.22	254.85	158.07	534.86	100	128.91	146.43	177.23	100	153.4	100	100	100	376.61	674.78	100	252.14	126.46	100	100	100	199.2	100	451.92	100	100	100	100	505.28	100	388.8	159.81	100	280.95	680.48	329.26	100	100	100	1863.32
IFITM1	782.72	4862.89	3832.43	2103.4	1995.14	763.82	4462.08	7155.52	1137.08	3171.07	2223.71	1388.44	3002.09	3113.02	474.14	4296.74	661.49	628.07	732.46	968.52	1087.19	743.75	2960.16	4797.63	1579.68	1692.03	584.69	1011.82	2376.21	4786.56	4097.79	2668.13	1789.21	2868.12	1691.21	1368.31	1998.16	3953.06	2166.89	4305.44	4889.35	2942.41	2960.81	6931.26	7814.98	5348.53	4734.69	4314.21	7615.43
IFITM2	1202.61	1914	1823.53	1238.66	1434.15	1276.57	1509.53	2615.46	1972.21	2044.67	1975.29	1179.1	2559.65	2068.55	1108.96	2093.68	901.63	1174.32	1287.85	1672.08	1800.94	1089.71	1826.55	2418.33	1314.39	1290.14	821.23	957.5	1667.32	1200.82	1604.53	2759.74	1932.87	2029.67	2115.35	1804.48	2503.48	1987.68	1618.18	1532.69	1810.74	1441.88	2849.15	1729.1	2619.79	2350.51	1702.99	1689.9	2556.5
IFNA1	100	100	100	100	100	100	100	100	100	100	100	100	100	100	100	100	100	100	100	100	100	100	100	100	100	100	100	100	100	100	100	100	100	100	100	100	100	100	100	100	100	100	100	100	100	100	100	100	100
IFNA17	100	100	100	100	100	100	100	100	100	100	100	100	100	100	100	100	100	100	100	100	100	100	100	100	100	100	100	100	100	100	100	100	100	100	100	100	100	100	100	100	100	100	100	100	100	100	100	100	100
IFNA2	100	100	100	100	100	100	100	100	100	100	100	100	100	100	100	100	100	100	100	100	100	100	100	100	100	100	100	100	100	100	100	100	100	100	100	100	100	100	100	100	100	100	100	100	100	100	100	100	100
IFNA7	100	100	100	100	100	100	100	100	100	100	100	100	100	100	100	100	100	100	100	100	100	100	100	100	100	100	100	100	100	100	100	100	100	100	100	100	100	100	100	100	123.38	100	100	100	100	100	100	100	100
IFNA8	100	100	100	100	100	100	100	100	100	100	100	100	100	100	100	100	100	100	100	100	100	100	100	100	100	100	100	100	100	100	100	100	100	100	100	100	100	100	100	100	100	100	100	100	100	100	100	100	100
IFNAR1	123.39	119.26	114.98	100	100	100	138.08	100	143.03	134.54	137.87	171.95	108.49	100	100	100	111.54	100	123.34	100	100	100	110.06	169.48	100	199.67	128.51	100	100	100	199.2	100	100	183.45	100	159.41	151.8	100	302.3	223.05	202.11	179.37	235.93	100	100	100	100	100	100
IFNAR2	340.95	477.17	451.04	384.73	379.01	542.27	364.08	1044.01	724.45	452.93	694.72	210.4	700.85	620.39	336.94	460.71	253.59	279.49	360.21	100	573.54	100	505.7	489.56	391.9	289.26	174.08	100	489.31	100	449.84	523.11	595.52	341.62	412.03	428	632.41	486.7	464.88	454.28	526.42	426.01	857.27	423.91	574.06	430.43	100	414.19	960.28
IFNB1	100	100	100	100	100	100	100	100	100	100	100	100	100	100	100	100	100	100	100	100	100	100	100	100	100	100	100	100	100	100	100	100	100	100	100	100	100	100	100	100	100	100	100	100	100	100	100	100	100
IFNG	100	100	100	100	100	100	100	100	100	100	100	100	100	100	100	100	100	100	100	100	100	100	100	100	100	100	100	100	100	100	100	100	100	100	100	100	100	100	100	100	100	100	100	100	100	100	100	100	100
IFNGR1	348.32	435.93	449.93	325.45	338.42	407.64	477.8	617.48	489.26	515.29	566.68	413.33	438.8	459.11	324.68	577.37	411	302.18	272.96	100	450.09	340.18	610.64	744.8	715.48	399.33	321.02	366.95	800.14	621.78	491.43	912.45	746.39	414.38	903.04	441.23	744.4	683.61	553.79	613.89	820.18	460.51	684.37	516.87	1319.91	542.71	378.03	463.89	690
IFNL1	100	100	100	100	100	100	100	100	100	100	100	100	100	100	100	100	100	100	100	100	100	100	100	100	100	100	100	100	100	100	100	100	100	100	100	100	100	100	100	100	100	100	100	100	100	100	100	100	100
IFNL2	100	100	100	100	100	100	100	100	100	100	100	100	100	100	100	100	100	100	100	100	100	100	100	100	100	100	100	100	100	100	100	100	100	100	100	100	100	100	100	100	100	100	100	100	100	100	100	100	100
IGF1R	1342.78	868.66	1281.22	1364	1443.39	1270.93	1124.46	868.01	1019.37	1162.5	974.67	1469.61	1075.32	865.86	962.42	1032.04	1062.74	1080.44	1169.1	1600.03	989.12	1290.68	898.55	1050.7	964.69	1548.68	1393.12	1370.52	893.19	1013.05	1487.42	880.18	1036.46	1049.58	908.01	1044.88	1128.55	1129.45	1496.25	1469.25	1390.08	1647.13	1415.57	1390.71	1035.03	1429.77	1699.25	1829.06	1097
IGF2R	356.41	417.58	493.54	452.99	446.12	417.96	452.92	444.03	454.46	451.89	336.27	434.69	445.22	527.74	456.3	541.51	436.78	403.66	396.55	534.65	481.22	458.14	415.25	474.47	285.39	412.13	443.38	517.44	393.85	497.33	344.77	532.29	560.77	369.49	483.71	411.24	529.33	100	337.86	327.41	363.09	355.3	399.82	100	362.19	524	494.05	341.29	100
IGLL1	100	100	100	100	100	100	100	100	100	100	100	100	100	100	100	100	100	100	100	100	100	100	100	100	100	100	100	100	100	100	100	100	100	100	100	100	100	100	100	100	100	100	100	100	100	100	100	100	100
IKBKB	100	208.79	255.32	248.6	180.56	254	100	259.01	227.76	240.24	260.46	100	212.24	100	159.39	187.9	100	191.65	153.31	100	100	100	186.48	100	100	100	129.02	100	100	100	151.04	100	100	100	100	100	100	100	100	100	165.68	100	208.91	100	173.22	100	100	100	100
IKBKE	100	100	100	100	100	100	100	230.23	100	100	100	100	144.7	100	100	100	100	100	100	100	100	100	100	100	100	100	100	100	100	100	100	100	100	100	100	100	100	100	100	100	177.43	100	214.32	100	100	100	100	100	100
IKBKG	100	215.8	176.38	100	176.06	100	100	219.21	216.49	186.57	100	120.69	195.35	100	136.88	144.41	165.77	100	100	100	100	100	171.5	100	100	135.67	141.82	100	100	100	151.04	100	100	100	100	100	100	100	100	100	170.38	100	199.91	100	143.16	100	100	100	100
IL10	100	100	100	100	100	100	100	100	100	100	100	100	100	100	100	100	100	100	100	100	100	100	100	100	100	100	100	100	100	100	100	100	100	100	100	100	100	100	100	100	100	100	100	100	100	100	100	100	100
IL10RA	100	100	191.53	100	100	100	100	457.21	100	178.98	360.65	100	277.43	100	100	181.28	100	100	100	100	100	100	142.99	274.67	100	100	100	100	282.84	100	197.01	100	305.04	100	100	100	201.6	100	261.65	100	319.61	100	226.92	100	267.7	100	100	100	451.52
IL11	100	100	100	100	100	100	100	100	100	100	100	100	100	100	100	100	100	100	100	100	100	100	100	100	100	100	100	100	100	100	100	100	100	100	100	100	100	100	100	100	100	100	100	100	100	100	100	100	100
IL11RA	100	100	100	100	100	100	100	100	100	100	100	100	128.36	100	100	100	100	100	100	100	100	100	100	100	100	100	103.93	100	100	100	100	100	100	100	100	100	100	100	100	100	100	100	100	100	100	100	100	100	100
IL12A	100	100	100	100	100	100	100	100	100	100	100	100	100	100	100	100	100	100	100	100	100	100	100	100	100	100	100	100	100	100	100	100	100	100	100	100	100	100	100	100	100	100	100	100	100	100	100	100	100
IL12B	100	100	100	100	100	100	100	100	100	100	100	100	100	100	100	100	100	100	100	100	100	100	100	100	100	100	100	100	100	100	100	100	100	100	100	100	100	100	100	100	100	100	100	100	100	100	100	100	100
IL12RB1	100	100	100	100	100	100	100	100	100	100	100	100	100	100	100	100	100	100	100	100	100	100	100	100	100	100	100	100	100	100	100	100	100	100	100	100	100	100	100	100	100	100	100	100	100	100	100	100	100
IL12RB2	100	100	100	100	100	100	100	100	100	100	100	100	100	100	100	100	100	100	100	100	100	100	100	100	100	100	100	100	100	100	100	100	100	100	100	100	100	100	100	100	100	100	100	100	100	100	100	100	100
IL13	100	100	100	100	100	100	100	100	100	100	100	100	100	100	100	100	100	100	100	100	100	100	100	100	100	100	100	100	100	100	100	100	100	100	100	100	100	100	100	100	100	100	100	100	100	100	100	100	100
IL13RA1	847.22	801.47	856.53	811.52	869.71	920.24	677.54	931.4	1082.89	1075.39	926	640.82	1066.12	911.67	756.05	967.84	932.73	666.26	717.99	835.73	772.36	673.65	909.4	869.56	759.69	674.51	609.78	725.56	764.02	739.01	737.69	1105.79	973.17	824	999.67	768	1162.83	917.68	716.37	710.07	916.53	841.67	878.88	847.81	1108.04	1040.51	711.14	702.47	915.76
IL13RA2	100	100	100	100	100	100	100	100	100	100	100	100	100	100	100	100	100	100	100	100	100	100	100	100	100	100	100	100	100	100	100	100	100	100	100	100	100	100	100	100	100	100	100	100	100	100	100	100	100
IL15	100	100	100	100	100	100	100	100	100	100	100	100	100	100	100	100	100	100	100	100	100	100	100	100	100	100	100	100	100	100	100	100	100	100	100	100	100	100	100	100	100	100	100	100	100	100	100	100	100
IL15RA	100	145.17	104.95	100	100	100	100	183.1	100	100	100	100	100	100	100	100	100	100	100	100	100	100	100	100	100	100	100	100	100	100	123.68	100	100	100	100	100	100	100	100	100	153.93	100	100	100	147.45	100	100	100	100
IL16	100	100	161.93	100	100	100	100	313.09	100	204.48	553.48	100	243.45	100	100	127.97	100	100	100	100	100	100	179.66	218.68	100	140.79	100	100	303.12	100	171.84	100	100	100	100	100	213.38	375.24	100	308.99	279.66	100	273.75	100	336.42	100	100	100	480.14
IL17A	100	100	100	100	100	100	100	100	100	100	100	100	100	100	100	100	100	100	100	100	100	100	100	100	100	100	100	100	100	100	100	100	100	100	100	100	100	100	100	100	100	100	100	100	100	100	100	100	100
IL17B	100	100	100	100	100	100	100	100	100	100	100	100	100	100	100	100	100	100	100	100	100	100	100	100	100	100	100	100	100	100	100	100	100	100	100	100	100	100	100	100	100	100	100	100	100	100	100	100	100
IL17F	100	100	100	100	100	100	100	100	100	100	100	100	100	100	100	100	100	100	100	100	100	100	100	100	100	100	100	100	100	100	100	100	100	100	100	100	100	100	100	100	100	100	100	100	100	100	100	100	100
IL17RA	100	100	100	100	100	100	100	100	100	100	100	100	100	100	100	100	100	100	100	100	100	100	100	100	100	100	100	100	100	100	137.91	100	100	100	100	100	100	100	100	100	159.81	100	100	100	164.63	100	100	100	100
IL17RB	874.02	100	1154.64	809.08	429.69	630.34	705.47	1134.66	1773.84	400.27	323.1	515.86	1019.26	1262.08	794.38	1471.58	867.33	760.91	552.11	1379.26	471.47	624.97	512.2	718.04	100	734.67	611.83	909.28	100	870.11	445.46	481.93	1606.75	100	709.58	491.73	976.91	382.67	609.68	437.91	425.37	938.26	363.8	100	372.21	1059.23	643.77	553.36	607.33
IL18	100	100	161.98	100	100	100	100	224.57	305.34	100	100	100	100	100	100	100	100	100	100	100	100	100	190.94	100	100	100	100	100	100	100	100	100	100	100	100	100	366.97	100	100	100	238.53	100	307.97	100	100	100	100	100	100
IL18R1	100	100	100	100	100	100	100	100	100	100	100	100	100	100	100	100	100	100	100	100	100	100	100	100	100	100	100	100	100	100	100	100	100	100	100	100	100	100	100	100	130.43	100	100	100	100	100	100	100	100
IL18RAP	100	100	100	100	100	100	100	100	100	100	100	100	100	100	100	100	100	100	100	100	100	100	100	100	100	100	100	100	100	100	100	100	100	100	100	100	100	100	100	100	100	100	100	100	100	100	100	100	100
IL19	100	100	100	100	100	100	100	100	100	100	100	100	100	100	100	100	100	100	100	100	100	100	100	100	100	100	100	100	100	100	100	100	100	100	100	100	100	100	100	100	100	100	100	100	100	100	100	100	100
IL1A	100	100	100	100	100	100	100	100	100	100	100	100	100	100	100	100	100	100	100	100	100	100	100	100	100	100	100	100	100	100	100	100	100	100	100	100	100	100	100	100	100	100	100	100	100	100	100	100	100
IL1B	100	100	100	100	100	100	100	100	100	100	100	100	100	100	100	100	100	100	100	100	100	100	100	100	100	100	100	100	100	100	100	100	100	100	100	100	100	100	100	100	100	100	100	100	100	100	100	100	100
IL1R1	237.64	368.66	207.08	238.88	174.76	234.75	200.22	409.39	389.05	252.71	262.77	142.05	298.63	100	215.55	213.74	183.71	185.56	153.5	100	100	100	236.61	245.63	219.06	172.79	124.93	100	249.37	100	259.4	305.68	100	100	274.75	286.23	292.7	100	315	100	387.76	289.76	561.9	100	294.9	100	100	100	416.54
IL1R2	100	100	100	100	100	100	100	100	100	100	100	100	100	100	100	100	100	100	100	100	100	100	100	100	100	100	100	100	100	100	100	100	100	100	100	100	100	100	100	100	100	100	100	100	100	100	100	100	100
IL1RAP	100	100	100	100	100	100	100	100	100	100	100	100	100	100	100	100	100	100	100	100	100	100	100	100	100	100	100	100	100	100	100	100	100	100	100	100	100	100	100	100	100	100	100	100	100	100	100	100	100
IL1RAPL2	100	100	100	100	100	100	100	100	100	100	100	100	100	100	100	100	100	100	100	100	100	100	100	100	100	100	100	100	100	100	100	100	100	100	100	100	100	100	100	100	100	100	100	100	100	100	100	100	100
IL1RL1	421.77	152.14	345.42	100	100	338.29	100	830.59	245.93	123.66	100	269.14	100.27	100	100	1114.6	282.44	100	100	100	100	100	339.77	540.59	100	100	100	100	404.16	336.16	128.06	507.92	378.84	100	505.43	100	100	512.71	454.72	319.22	252.63	100	264.74	100	303.49	100	100	100	569.17
IL1RL2	100	100	100	100	100	100	100	100	100	100	100	100	100	100	100	100	100	100	100	100	100	100	100	100	100	100	100	100	100	100	100	100	100	100	100	100	100	100	100	100	100	100	100	100	100	100	100	100	100
IL1RN	100	100	100	100	100	100	100	100	100	100	100	100	100	100	100	100	100	100	100	100	100	100	100	100	100	100	100	100	100	100	100	100	100	100	100	100	100	100	100	100	100	100	100	100	100	100	100	100	100
IL2	100	100	100	100	100	100	100	100	100	100	100	100	100	100	100	100	100	100	100	100	100	100	100	100	100	100	100	100	100	100	100	100	100	100	100	100	100	100	100	100	100	100	100	100	100	100	100	100	100
IL21	100	100	100	100	100	100	100	100	100	100	100	100	100	100	100	100	100	100	100	100	100	100	100	100	100	100	100	100	100	100	100	100	100	100	100	100	100	100	100	100	100	100	100	100	100	100	100	100	100
IL21R	100	100	100	100	100	100	100	100	100	100	100	100	100	100	100	100	100	100	100	100	100	100	100	100	100	100	100	100	100	100	100	100	100	100	100	100	100	100	100	100	100	100	100	100	100	100	100	100	100
IL22	100	100	100	100	100	100	100	100	100	100	100	100	100	100	100	100	100	100	100	100	100	100	100	100	100	100	100	100	100	100	100	100	100	100	100	100	100	100	100	100	100	100	100	100	100	100	100	100	100
IL22RA1	100	100	100	100	100	100	100	100	100	100	100	100	100	100	100	100	100	100	100	100	100	100	100	100	100	100	100	100	100	100	100	100	100	100	100	100	100	100	100	100	100	100	100	100	100	100	100	100	100
IL22RA2	100	100	100	100	100	100	100	100	100	100	100	100	100	100	100	100	100	100	100	100	100	100	100	100	100	100	100	100	100	100	100	100	100	100	100	100	100	100	100	100	100	100	100	100	100	100	100	100	100
IL23A	100	100	100	100	100	100	100	100	100	100	100	100	100	100	100	100	100	100	100	100	100	100	100	100	100	100	100	100	100	100	100	100	100	100	100	100	100	100	100	100	100	100	100	100	100	100	100	100	100
IL23R	100	100	100	100	100	100	100	100	100	100	100	100	100	100	100	100	100	100	100	100	100	100	100	100	100	100	100	100	100	100	100	100	100	100	100	100	100	100	100	100	100	100	100	100	100	100	100	100	100
IL24	100	100	100	100	100	100	100	100	100	100	100	100	100	100	100	100	100	100	100	100	100	100	100	100	100	100	100	100	100	100	100	100	100	100	100	100	100	100	100	100	100	100	100	100	100	100	100	100	100
IL25	100	100	100	100	100	100	100	100	100	100	100	100	100	100	100	100	100	100	100	100	100	100	100	100	100	100	100	100	100	100	100	100	100	100	100	100	100	100	100	100	100	100	100	100	100	100	100	100	100
IL26	100	100	100	100	100	100	100	100	100	100	100	100	100	100	100	100	100	100	100	100	100	100	100	100	100	100	100	100	100	100	100	100	100	100	100	100	100	100	100	100	100	100	100	100	100	100	100	100	100
IL27	100	100	100	100	100	100	100	100	100	100	100	100	100	100	100	100	100	100	100	100	100	100	100	100	100	100	100	100	100	100	100	100	100	100	100	100	100	100	100	100	100	100	100	100	100	100	100	100	100
IL2RA	100	100	100	100	100	100	100	100	100	100	100	100	100	100	100	100	100	100	100	100	100	100	100	100	100	100	100	100	100	100	100	100	100	100	100	100	100	100	100	100	100	100	100	100	100	100	100	100	100
IL2RB	100	100	100	100	100	100	100	100	100	100	100	100	100	100	100	100	100	100	100	100	100	100	100	100	100	100	100	100	100	100	100	100	100	100	100	100	100	100	100	100	100	100	100	100	100	100	100	100	100
IL2RG	100	100	100	100	100	100	100	147.13	100	100	141.29	100	100	100	100	100	100	100	100	100	100	100	100	110.46	100	100	100	100	100	100	161.99	100	100	100	100	100	100	100	100	208.72	164.51	100	100	100	260.55	100	100	100	100
IL3	100	100	100	100	100	100	100	100	100	100	100	100	100	100	100	100	100	100	100	100	100	100	100	100	100	100	100	100	100	100	100	100	100	100	100	100	100	100	100	100	100	100	100	100	100	100	100	100	100
IL32	231.1	202.83	1090.65	487.01	266.58	182.28	594.39	1572.77	2036.76	408.82	722.86	510.52	1886.05	1170.65	1072.93	889.36	358.84	393.84	510.95	1661.2	967.84	399.61	1463.65	1205.36	468.28	1589.64	301.56	409.18	475.1	628.51	874.5	1605.3	1968.67	421.51	717.82	631.42	2201.95	705.9	320.08	427.68	1340.72	948.61	2843.74	1018.86	2380.71	1384.85	587.63	1325.41	2019.12
IL34	100	100	100	100	100	100	100	100	100	100	100	100	100	100	100	100	100	100	100	100	100	100	100	100	100	100	100	100	100	100	100	100	100	100	100	100	100	100	100	100	100	100	100	100	100	100	100	100	100
IL3RA	100	100	100	100	100	100	100	100	100	100	100	100	100	100	100	100	100	100	100	100	100	100	100	100	100	100	100	100	100	100	100	100	100	100	100	100	100	100	100	100	100	100	100	100	100	100	100	100	100
IL4	100	100	100	100	100	100	100	100	100	100	100	100	100	100	100	100	100	100	100	100	100	100	100	100	100	100	100	100	100	100	100	100	100	100	100	100	100	100	100	100	100	100	100	100	100	100	100	100	100
IL4R	190.86	204.14	256.53	186.25	180.21	100	162.96	267.29	185.34	245.18	277.64	122.82	224.27	100	141.15	196.03	158.4	128.73	155.95	100	100	100	195.47	217.89	100	100	163.32	100	260.96	100	161.99	100	100	100	278.11	100	216.86	100	100	208.72	197.41	186.27	297.16	100	267.7	100	100	100	100
IL5	100	100	100	100	100	100	100	100	100	100	100	100	100	100	100	100	100	100	100	100	100	100	100	100	100	100	100	100	100	100	100	100	100	100	100	100	100	100	100	100	100	100	100	100	100	100	100	100	100
IL5RA	100	100	100	100	100	100	100	100	100	100	100	100	100	100	100	100	100	100	100	100	100	100	100	100	100	100	100	100	100	100	100	100	100	100	100	100	100	100	100	100	100	100	100	100	100	100	100	100	100
IL6	100	100	100	100	100	100	100	100	100	100	100	100	100	100	100	100	100	100	100	100	100	100	100	100	100	100	100	100	100	100	100	100	100	100	100	100	100	100	100	100	100	100	100	100	100	100	100	100	100
IL6R	203.38	100	376.24	100	210.59	100	227.05	275.16	260.3	165.54	280.95	106.8	291.11	100	229.51	183.17	199.46	168.07	158.41	100	100	100	273.17	614.31	100	193.27	226.3	465.15	331.48	100	125.87	327.39	310.39	100	100	100	259.86	100	100	458.37	320.79	100	208.91	100	283.45	100	100	100	100
IL6ST	2955.25	3653.13	3480.27	2440.83	2230.96	3098.91	2635.37	3188.17	3754.24	3178.23	2760.11	1826.33	2750.71	2388.16	2066.03	2912.79	3031.27	1901.58	2134.37	2580.45	2471.24	2233.3	2985.17	3793.57	2045.94	2210.4	2165.71	2293.7	3488.34	3071.85	2224.02	3760.32	3419.4	2695.75	3841.63	2314.09	3941.72	2827.33	2263.42	2566.07	2783.68	2048.99	2679.85	2205.06	2818.77	2122.19	1886.39	2339.35	2702.76
IL7	100	100	100	100	100	100	100	100	100	100	100	100	100	100	100	100	100	100	100	100	100	100	100	100	100	100	100	100	100	100	100	100	100	100	100	100	100	100	100	100	100	100	100	100	100	100	100	100	100
IL7R	100	100	100	100	100	100	100	100	100	100	152.7	100	100	100	100	100	100	100	100	100	100	100	100	100	100	100	100	100	100	100	100	100	100	100	100	100	100	423.54	100	288.53	259.68	100	362	100	334.99	100	100	100	100
IL8	100	100	100	100	100	100	100	173.75	100	100	100	100	100	100	100	100	100	100	100	100	100	100	100	148.22	100	100	100	100	100	100	100	138.43	100	100	100	100	100	100	284.52	100	126.9	100	232.33	100	100	100	100	100	100
IL9	100	100	100	100	100	100	100	100	100	100	100	100	100	100	100	100	100	100	100	100	100	100	100	100	100	100	100	100	100	100	100	100	100	100	100	100	100	100	100	100	100	100	100	100	100	100	100	100	100
ILF3	902.37	899.52	934.41	1035.01	1102.65	870.28	988.02	1049.47	1028.11	1164.29	1228.55	1256	1032.09	1180.36	1054.37	1100.27	990.39	1043.72	1083.27	1023.95	994.09	977.37	1070.75	879	1185.76	1172.39	1007.08	905.63	999.61	958.17	1190.81	1040.29	913.68	971.95	1001.42	1000.84	1041.37	1114.59	1166.01	1170.49	1131.57	1234.91	1291.3	1253.13	1212.55	1055.48	1010.57	1057.01	1071.57
INPP5D	100	100	100	100	100	100	100	269.92	100	100	219.49	100	146.06	100	100	158.67	100	100	100	100	100	100	100	100	207.01	100	100	100	100	100	186.06	100	100	100	100	100	100	100	100	218.96	165.68	100	100	100	259.12	100	100	100	352.95
IRAK1	289.1	221.47	457.63	294.12	271.65	100	220.89	492.35	486.45	323.64	419.7	208.27	475.88	603.73	326.39	352.15	270.88	290.02	310.04	100	393.99	100	312.28	397.17	100	259.82	231.93	100	299.02	100	250.64	397.81	100	100	273.42	282.27	432.92	100	100	345.83	291.41	248.36	408.82	100	380.8	100	100	374.43	400.64
IRAK2	100	100	100	100	100	100	100	100	100	100	100	100	100	100	100	100	100	100	100	100	100	100	100	100	100	100	100	100	100	100	100	100	100	100	100	100	100	100	100	100	100	100	100	100	100	100	100	100	100
IRAK4	100	100	100	100	100	100	100	100	100	114.67	100	100	120.49	100	100	101.12	100	100	100	100	100	100	100	100	100	133.11	121.85	100	100	100	174.02	100	100	100	100	100	100	100	100	212.82	160.98	100	183.7	100	100	100	100	100	100
IRF1	100	373.76	321.31	100	100	100	100	702.05	100	291.41	270.96	100	284.77	100	100	235.06	100	100	100	100	100	100	100	100	100	100	100	100	100	100	140.1	100	100	100	100	100	261.71	100	100	100	100	100	190.9	100	100	100	100	100	100
IRF2	215.62	254.85	266.33	188.25	195.52	204.79	265.11	294.87	224.66	268.51	281.6	234.97	256.03	318.57	149.65	267.86	236.01	188.77	199.6	100	100	100	250.55	250.86	299.46	293.1	202.75	233.24	268.13	264.31	270.34	269.55	314.9	241.17	245.17	226.86	290.91	100	381.05	315.13	289.06	312.18	264.74	100	403.7	494.06	374.28	100	397.47
IRF3	100	100	100	100	100	100	100	100	100	100	100	100	100	100	100	100	100	100	100	100	100	100	100	100	100	100	139.26	100	100	100	100	100	100	100	100	100	100	100	100	100	100	100	190.9	100	100	100	100	100	100
IRF4	100	100	205.17	100	100	100	100	445.76	100	100	406.59	100	198.86	100	100	146.54	100	100	100	100	100	100	100	100	100	100	100	100	387.02	100	132.43	100	390.32	100	100	268.98	100	100	100	216.91	159.81	100	277.35	100	186.1	407.97	100	100	715.44
IRF5	100	100	100	100	100	100	100	100	100	100	100	100	285.97	100	100	100	100	100	100	100	100	100	100	100	100	100	119.81	100	100	100	111.64	100	100	100	100	100	100	100	100	100	100	100	100	100	100	100	100	100	100
IRF7	100	758.68	740.3	382.06	272.49	100	516	1040.3	100	564.33	519.92	100	711.2	100	100	488.45	100	100	100	100	100	100	292.71	900.06	100	159.99	100	100	310.33	100	317.4	100	100	100	100	100	100	750.49	100	685.51	554.62	382.89	381.81	561.49	363.62	572.66	100	470.52	1656.63
IRF8	100	100	100	100	100	100	100	296.3	100	100	262.18	100	225.26	100	100	163.16	100	100	100	100	100	100	100	100	100	100	100	100	100	100	100	100	100	100	100	100	100	100	100	100	100	100	100	100	100	100	100	100	100
IRGM	100	100	100	100	100	100	100	100	100	100	100	100	100	100	100	100	100	100	100	100	100	100	100	100	100	100	100	100	100	100	100	100	100	100	100	100	100	100	100	100	100	100	100	100	100	100	100	100	100
ISG15	100	4079.13	2621.13	956.6	660.08	100	1978.6	5016.51	230.63	1478.99	570.35	100	1507.9	871.14	100	1849.84	100	100	190.51	100	100	100	636.26	3082.09	100	408.29	100	100	355.33	1641.09	951.12	100	414.86	706.33	100	100	438.01	1460.11	452.18	1796.66	1481.73	931.36	570.91	2967.35	838.9	1482.17	1691.76	1782.68	4378.48
ISG20	100	100	397.96	100	100	100	100	847.88	100	100	324.89	100	262.52	100	100	100	100	100	100	100	100	100	100	412.38	100	100	100	100	100	100	100	100	100	100	100	100	100	100	100	317.18	197.41	100	210.71	100	221.89	100	100	100	639.12
ITCH	668.65	699.16	613.81	589.03	617.32	800.42	612.24	681.86	711.34	695.84	638.33	774.32	628.57	651	551.17	793.91	833.28	600.45	643.36	684.55	515.75	591.56	699.17	569.6	858.17	625.87	607.73	611.72	731.85	628.86	664.36	611.02	796.66	576.35	743.76	541.28	835.24	639.03	657.94	669.14	708.55	651.95	601.53	602.39	837.47	550.2	632.54	639.51	632.76
ITGA1	1507.93	1323.56	1252.26	1262.79	1584.54	1383.82	1354.99	1262.83	1725.7	1781.63	1322.09	1312.61	1327.65	819.15	1048.75	1776.82	1605.98	1180.75	987.35	1603.04	1254.17	1162.51	1341.07	1115.9	1648.01	1213.35	837.1	1045.4	1357.82	1116.08	1220.36	1398.41	1332.63	1576.46	1831.76	1289.48	1861.21	1523.27	1564.84	1158.21	1391.25	1564.34	1262.48	1580.36	1547.53	1669.31	1362.39	1245.88	763.13
ITGA2	100	182.64	203.95	188.32	222.49	214.54	175.28	205.86	100	256.71	216.54	208.27	187.42	100	193.3	220.85	196.26	231.78	187.79	100	100	100	236.84	175.67	263.28	223.98	181.76	100	194.42	100	168.55	246.78	100	100	208.26	273.9	324.97	100	100	212.82	149.23	186.27	100	100	296.34	100	100	100	100
ITGA2B	100	100	100	100	100	100	100	100	100	100	100	100	100	100	100	100	100	100	100	100	100	100	100	100	100	100	100	100	100	100	100	100	100	100	100	100	100	100	100	100	100	100	100	100	100	100	100	100	100
ITGA4	100	100	100	100	100	100	100	431.52	100	100	341.17	100	190.94	100	100	100	100	100	100	100	100	100	100	100	100	100	100	100	100	100	100	100	100	100	100	100	100	100	100	100	100	100	100	100	100	100	100	100	100
ITGA5	100	280.26	144.12	100	153.2	100	100	226.4	145.15	195.16	183.29	245.65	163.55	100	104.56	187.42	148.72	112.91	117.53	100	100	100	219.95	189.69	281.37	158.71	100.86	100	217.84	100	154.32	244.1	198.68	195.07	190.53	100	188.83	100	261.65	229.19	270.26	232.84	343.99	100	350.74	100	100	100	340.23
ITGA6	378.29	243.23	473.43	396.44	376.37	352.68	495.48	509.35	499.77	398.45	378.84	499.84	752.3	543.69	462.52	622.88	483.93	387.2	320.46	513.19	482.09	511.83	604.71	724.63	409.99	666.83	462.33	694.72	559.45	497.02	484.86	570.96	934.18	445.31	458.14	427.74	833.21	460.7	406.45	511.58	470.02	444.98	551.1	613.55	443.79	524	565.17	563.3	721.8
ITGAE	100	100	100	100	100	100	100	100	100	100	100	100	100	100	100	100	105.4	100	100	100	100	100	100	100	100	100	100	100	100	100	100	100	100	100	100	100	128.52	100	100	100	100	100	100	100	100	100	100	100	100
ITGAL	100	100	100	100	100	100	100	353.32	100	100	305.4	100	138.59	100	100	100	100	100	100	100	100	100	100	157.36	100	138.23	100	100	182.45	100	184.97	100	100	100	100	100	100	100	284.52	229.19	230.31	100	212.52	100	196.13	100	100	100	508.76
ITGAM	100	100	100	100	100	100	100	154.84	100	100	100	100	100	100	100	100	100	100	100	100	100	100	100	100	100	100	100	100	100	100	100	100	100	100	100	100	100	100	100	100	129.25	100	100	100	100	100	100	100	100
ITGAX	100	100	100	100	100	100	100	458.01	100	141.95	265.71	100	250.48	100	100	139.35	100	100	100	100	100	100	100	359.4	100	100	100	100	215.01	100	126.96	100	299.25	100	100	100	100	100	340.4	243.51	183.31	100	349.39	100	250.53	100	100	100	553.27
ITGB1	2388.69	3231.36	2383.07	2215.94	2447.11	2531.58	2464.92	3088.45	3681.93	3439.06	2778.76	2883.68	2956.52	2362.65	2199.07	3563.78	3107.79	2002.3	1913.19	3265.09	3402.23	2571.6	3399.55	3430.04	3587.43	2438.22	2090.45	2223.61	3061.52	2883.36	2517.34	4301.75	3453.49	3431.51	3646.68	3051	5170.86	2894.21	2926.45	2422.83	3058.64	2942.41	3924.33	3030.57	4268.96	3192.65	3069.13	2488.46	2953.96
ITGB2	100	156.46	218.84	100	100	100	177.52	730.3	263.1	224.26	460.46	100	302.79	363.9	100	223.28	100	100	100	100	100	100	202.93	426.37	100	136.95	100	100	414.25	100	247.36	271.54	261	100	100	100	330.01	382.67	360.73	100	285.54	100	230.53	100	283.45	100	100	100	559.63
ITGB3	235.05	183.31	255.93	100	100	372.86	100	642.55	765.57	242.03	100	138.84	412.42	100	209.57	323.08	196.75	100	100	100	100	100	267.72	239.78	100	151.03	100	100	100	100	163.08	590.28	100	100	100	100	708.8	100	299.76	216.91	325.49	231.12	778.02	100	428.04	100	100	100	100
ITGB4	100	100	170.99	100	240	100	100	100	257.13	226.96	304.82	146.32	272.11	100	194.76	165.35	176.63	197.82	254.71	100	100	100	251.2	100	100	142.07	175.1	100	100	100	145.57	322.42	100	364.06	328.76	304.65	100	100	100	100	184.48	100	380.01	100	452.38	100	100	100	100
ITK	100	100	100	100	100	100	100	100	100	100	100	100	100	100	100	100	100	100	100	100	100	100	100	100	100	100	100	100	100	100	100	100	100	100	100	100	100	100	100	100	100	100	100	100	100	100	100	100	100
JAK1	357.51	584.3	546.1	484.87	515.67	403.3	592.88	588.92	667.48	646.72	630.14	585.28	624.03	707.63	602.92	498.79	409.14	447.52	486.46	593.8	661.12	612.83	555	679.67	687.34	607.95	494.58	421.08	641.28	641.09	669.83	665.81	573.54	639.62	632.82	615.71	714.29	672.47	678.26	753.04	715.6	584.69	1030.16	832.94	934.82	669.97	572.65	695.84	677.28
JAK2	481.05	633.63	579.26	448.46	551.93	499.77	437.86	732.23	426.93	605.58	700.44	493.43	535	490.42	347.75	494.79	371.63	468.93	414.18	544.06	437.19	647.6	542.07	507.04	484.35	505.56	436.73	380.36	568.5	459.6	576.8	433.31	438.03	395.82	488.07	401.99	513.94	1148.02	668.1	908.56	714.43	734.74	610.53	568.93	741.56	707.4	501.54	593.12	1131.98
JAK3	100	100	100	100	100	100	100	146.04	100	100	100	100	100	100	100	100	100	100	100	100	100	100	100	100	100	100	100	100	100	100	110.54	100	100	100	100	100	100	100	100	100	145.71	100	302.56	100	100	100	100	100	100
JAM3	241.18	363.28	180.84	205.43	219.81	238.03	205.74	100	186.4	323.64	279.13	202.93	166.32	100	143.92	191.86	173.22	204.39	203.38	100	100	351.91	210.95	224.05	100	158.71	198.65	100	226.33	100	177.31	100	100	241.06	226.75	269.77	207.93	100	100	214.86	225.61	208.69	180.1	100	157.47	100	100	100	100
Kat2B	432.77	452.24	495.43	533.17	460.32	449.94	447.4	469.62	420.63	451.66	420.2	473.14	355.79	100	297.15	425.94	432.93	382.27	527.26	100	100	464.42	288.21	424.43	478.32	391.65	396.28	289.25	307.42	428.68	516.6	280.23	413.73	406.13	436.28	409.88	431.64	453.26	431.85	413.35	336.06	389.79	293.56	528.02	465.26	100	100	100	343.41
KIR_Activating_Subgroup_1	100	100	100	100	100	100	100	100	100	100	100	100	100	100	100	100	100	100	100	100	100	100	100	100	100	100	100	100	100	100	100	100	100	100	100	100	100	100	100	100	100	100	100	100	100	100	100	100	100
KIR_Activating_Subgroup_2	100	100	100	100	100	100	100	100	100	100	100	100	100	100	100	100	100	100	100	100	100	100	100	100	100	100	100	100	100	100	100	100	100	100	100	100	100	100	100	100	100	100	100	100	100	100	100	100	100
KIR_Inhibiting_Subgroup_1	100	100	100	100	100	100	100	100	100	100	100	100	100	100	100	100	100	100	100	100	100	100	100	100	100	100	100	100	100	100	100	100	100	100	100	100	100	100	100	100	100	100	100	100	100	100	100	100	100
KIR_Inhibiting_Subgroup_2	100	100	100	100	100	100	100	100	100	100	100	100	100	100	100	100	100	100	100	100	100	100	100	100	100	100	100	100	100	100	100	100	100	100	100	100	100	100	100	100	100	100	100	100	100	100	100	100	100
KIR3DL1	100	100	100	100	100	100	100	100	100	100	100	100	100	100	100	100	100	100	100	100	100	100	100	100	100	100	100	100	100	100	100	100	100	100	100	100	100	100	100	100	100	100	100	100	100	100	100	100	100
KIR3DL2	100	100	100	100	100	100	100	100	100	100	100	100	100	100	100	100	100	100	100	100	100	100	100	100	100	100	100	100	100	100	100	100	100	100	100	100	100	100	100	100	100	100	100	100	100	100	100	100	100
KIR3DL3	100	100	100	100	100	100	100	100	100	100	100	100	100	100	100	100	100	100	100	100	100	100	100	100	100	100	100	100	100	100	100	100	100	100	100	100	100	100	100	100	100	100	100	100	100	100	100	100	100
KIT	100	100	100	100	100	100	100	100	100	100	100	120.69	100	100	100	100	100	100	100	100	100	100	100	100	100	100	100	100	100	100	100	100	100	100	100	100	100	100	100	100	100	100	100	100	100	100	100	100	100
KLF2	556.22	596.4	748.84	496.92	448.42	598.1	380.78	686.36	549.78	670.46	1286.74	301.18	513.84	100	335.19	407.9	380.35	417.71	553.45	1221.67	507.8	773.05	649.86	727.88	227.1	386.53	387.57	491.1	1579.74	606.76	479.39	422.6	384.66	361.36	535.22	446.87	100	1222.33	655.4	1064.08	595.75	498.45	713.19	490.84	402.27	568.91	729.85	526.85	683.64
KLF4	100	490.49	100	100	100	100	100	373.16	100	246.78	388.32	119.62	279.91	100	100	268.29	100	100	100	100	100	100	421.83	100	211.03	100	100	100	582.19	100	166.36	100	100	100	100	100	100	404.97	100	216.91	219.73	100	244.93	100	239.07	100	100	100	100
KLRB1	100	100	100	100	100	100	100	100	100	100	100	100	100	100	100	100	100	100	100	100	100	100	100	100	100	100	100	100	100	100	100	100	100	100	100	100	100	100	100	100	100	100	100	100	100	100	100	100	100
KLRC1	100	100	100	100	100	100	100	100	100	100	100	100	100	100	100	100	100	100	100	100	100	100	100	100	100	100	100	100	100	100	100	100	100	100	100	100	100	100	100	100	100	100	100	100	100	100	100	100	100
KLRC2	100	100	100	100	100	100	100	100	100	100	100	100	100	100	100	100	100	100	100	100	100	100	100	100	100	100	100	100	100	100	100	100	100	100	100	100	100	100	100	100	100	100	100	100	100	100	100	100	100
KLRD1	100	100	100	100	100	100	100	100	100	100	100	100	100	100	100	100	100	100	100	100	100	100	100	100	100	100	100	100	100	100	100	100	100	100	100	100	100	100	100	100	100	100	100	100	100	100	100	100	100
KLRF1	100	100	100	100	100	100	100	100	100	100	100	100	100	100	100	100	100	100	100	100	100	100	100	100	100	100	100	100	100	100	100	100	100	100	100	100	100	100	100	100	100	100	100	100	100	100	100	100	100
KLRG1	100	100	100	100	100	100	100	100	100	100	100	100	100	100	100	100	100	100	100	100	100	100	100	100	100	100	100	100	100	100	100	100	100	100	100	100	100	100	100	100	100	100	100	100	100	100	100	100	100
KLRK1	100	100	100	100	100	100	100	100	100	100	100	100	100	100	100	100	100	100	100	100	100	100	100	100	100	100	100	100	100	100	100	100	100	100	100	100	100	100	100	100	100	100	100	100	100	100	100	100	100
LAG3	100	100	100	100	100	100	100	307.81	100	100	100	100	100	100	100	100	100	100	100	100	100	100	100	100	100	100	100	100	100	100	100	100	100	100	100	100	100	100	100	100	100	100	100	100	100	100	100	100	100
LAIR2	100	100	100	100	100	100	100	100	100	100	100	100	100	301.02	100	100	100	100	100	100	100	100	100	100	100	100	100	100	100	100	100	100	100	100	100	100	100	100	100	100	168.03	100	100	100	100	100	100	100	100
LAMP1	3977.67	3293.13	4845.38	3876.97	3005.29	3455.6	3677.3	3561.63	4918.73	3568.16	2814.86	3361.08	3934.83	4531.04	4499.45	3767.99	4629.46	3386.22	3503.84	5013.63	3825.06	4563.69	3053.17	4146.31	1907.27	4964.75	3444.14	4546.43	3129.3	3382.18	3957.7	3619.85	4066.9	3877.88	3272.98	2831.02	4678.76	3778.44	3452.29	3916.64	3934.04	3853.07	3796.46	3491.66	2575.41	3578.16	3870.09	4400.36	3402.3
LAMP2	1346.07	610.05	1278.28	1010.42	1212.88	1266.24	998.45	1305.36	1266.51	1133.62	809.07	1245.32	1041.38	2157.67	1142.29	1567.96	1123.22	1170.94	1083.43	1683.11	1626.53	1770.59	1268.79	1647.22	612.98	1223.59	1173.99	1516.3	1523.52	1386.36	904.05	1635.45	1401.65	1282.57	1132.52	1023.22	1802.41	1047.71	1219.35	963.81	997.61	1040.02	1129.21	925.9	980.63	2455.31	1860.19	1143.17	1042.95
LAMP3	100	100	100	100	100	100	100	100	100	100	100	100	100	100	100	100	100	100	100	100	100	100	100	100	100	100	100	100	100	100	100	100	100	100	100	100	100	100	100	100	100	100	100	100	100	100	100	100	100
LBP	100	100	100	100	100	100	100	100	100	100	100	100	100	100	100	111.6	100	100	100	100	100	100	100	100	100	134.39	100	100	100	100	100	100	100	100	100	100	100	100	100	100	100	100	100	100	100	100	100	100	100
LCK	100	100	100	100	100	100	100	100	100	100	100	100	100	100	100	100	100	100	100	100	100	100	100	100	100	100	100	100	100	100	100	100	100	100	100	100	100	100	100	100	100	100	100	100	100	100	100	100	100
LCN2	100	100	100	100	100	100	100	100	100	100	100	100	100	100	100	100	100	100	100	100	100	100	100	100	100	100	100	100	100	100	100	100	100	100	100	100	100	100	100	100	100	100	252.14	100	323.54	100	100	100	100
LCP1	104.52	185.18	169.59	166.38	100	171.81	171.47	824.69	250.71	181.96	425.14	123.89	344.71	368.05	100	224.52	100	100	100	100	215.27	100	183.92	464.13	299.46	328.94	100	100	303.19	100	591.03	230.79	360.34	203.96	215.41	131.21	319.97	1017.99	1117.74	804.2	589.87	279.41	751.01	100	727.24	756.06	100	420.82	1345.02
LGALS3	817.59	632.81	660.26	470.61	691.83	662.93	359.4	848.47	816.06	612.86	969.62	923.84	462.87	1022.4	605.35	673.59	1011.82	611.61	417.52	779.48	772.85	449.7	897.78	693.99	1047.09	567	339.96	850.47	867.89	497.56	621.67	959.1	718.21	649	702.34	650.25	883.85	809.93	792.58	523.86	508.79	715.77	626.74	572.65	1264.08	827.17	1092.91	662.7	585.07
LIF	100	100	100	100	100	100	100	204.37	100	100	100	100	151.41	100	100	100	100	100	100	100	100	100	100	100	100	100	100	100	100	100	100	100	100	100	100	100	100	100	100	100	100	100	239.53	100	100	100	100	100	100
LILRA1	100	100	100	100	100	100	100	100	100	100	100	100	100	100	100	100	100	100	100	100	100	100	100	100	100	100	100	100	100	100	100	100	100	100	100	100	100	100	100	100	100	100	100	100	100	100	100	100	100
LILRA4	100	100	100	100	100	100	100	100	100	100	100	100	100	100	100	100	100	100	100	100	100	100	100	100	100	100	100	100	100	100	100	100	100	100	100	100	100	100	100	100	100	100	100	100	100	100	100	100	100
LILRA5	100	100	100	100	100	100	100	100	100	100	100	100	100	100	100	100	100	100	100	100	100	100	100	100	100	100	100	100	100	100	100	100	100	100	100	100	100	100	100	100	100	100	100	100	100	100	100	100	100
LILRB1	100	100	100	100	100	100	100	426.44	100	100	100	100	100	100	100	100	100	100	100	100	100	100	100	100	100	100	100	100	100	100	100	100	100	100	100	100	100	100	100	100	100	100	100	100	161.77	100	100	100	100
LILRB2	100	100	100	100	100	100	100	402.9	100	100	100	100	100	100	100	100	100	100	100	100	100	100	100	100	100	100	100	100	100	100	100	100	100	100	100	100	100	100	100	100	100	100	100	100	100	100	100	100	100
LILRB3	100	100	100	100	100	100	100	100	100	100	100	100	100	100	100	100	100	100	100	100	100	100	100	100	100	100	100	100	100	100	100	100	100	100	100	100	100	100	100	100	100	100	100	100	100	100	100	100	100
LRP1	304.45	484.47	318.17	353.4	530.98	386.92	481.34	513.73	438.35	699.84	655.67	513.72	481.42	387.73	472.54	400.66	427.29	346.74	466.7	100	642.37	432.72	577.15	452.42	649.15	455.65	296.95	248.22	430.42	290.97	520.98	565.25	419.22	755.77	716.6	662.9	453.69	743.06	533.47	374.47	627.47	370.82	615.93	713.95	661.39	617.57	374.28	394.31	585.07
LRRN3	100	100	100	100	100	100	100	100	100	100	100	100	100	100	100	100	100	100	100	100	100	100	100	100	100	100	100	100	100	100	100	100	100	100	100	100	100	100	100	100	100	100	100	100	100	100	100	100	100
LTA	100	100	100	100	100	100	100	100	100	100	100	100	100	100	100	100	100	100	100	100	100	100	100	100	100	100	100	100	100	100	100	100	100	100	100	100	100	100	100	100	100	100	100	100	100	100	100	100	100
LTB	100	100	100	100	100	100	100	100	100	100	507.7	100	213.53	100	100	100	100	100	100	100	100	100	100	100	100	100	100	100	100	100	100	100	100	100	100	100	100	100	100	227.14	131.6	100	398.02	100	100	100	100	100	100
LTBR	625.87	461.77	857.05	575.63	592.34	672.08	479.57	652.66	887.94	496.51	478.38	616.25	580.66	995.34	572.7	713.13	564.24	523.9	499.23	851.93	679.91	674.22	669.22	763.27	566.75	757.7	612.34	670.37	562.21	667.26	598.69	976.5	729.76	489.01	615.3	531.44	819.01	717.05	782.42	708.02	870.71	902.04	900.49	699.08	844.63	1485.91	973.14	695.84	992.07
LTF	100	100	109.26	100	100	100	100	282.32	181.84	100	226.32	100	592.13	100	100	100	100	100	100	100	100	100	363.69	100	409.99	100	100	100	100	100	159.8	1444.2	410.02	100	100	100	244.96	100	100	100	418.32	100	6262	100	2619.79	100	100	100	100
LTK	100	100	100	100	100	100	100	100	100	100	100	100	100	100	100	100	100	100	100	100	100	100	100	100	100	100	100	100	100	100	100	100	100	100	100	100	100	100	100	100	100	100	100	100	100	100	100	100	100
LY86	100	100	100	100	100	100	100	100	100	100	100	100	100	100	100	100	100	100	100	100	100	100	100	100	100	100	100	100	100	100	100	100	100	100	100	100	100	100	100	100	100	100	100	100	150.32	100	100	100	100
LY9	100	100	100	100	100	100	100	100	100	100	100	100	100	100	100	100	100	100	100	100	100	100	100	100	100	100	100	100	100	100	100	100	100	100	100	100	100	100	100	100	100	100	100	100	100	100	100	100	100
LY96	100	100	100	100	100	100	100	179.35	100	100	100	100	100	100	100	100	100	100	100	100	100	100	100	100	100	100	100	100	100	100	121.49	100	100	100	100	100	100	100	100	100	128.08	100	205.31	100	256.25	100	100	100	100
LYN	100	100	100	100	100	100	100	100	100	100	100	100	100	100	100	100	100	100	100	100	100	100	100	100	100	100	100	100	100	100	100	100	100	100	100	100	100	100	100	100	100	100	100	100	100	100	100	100	100
MAF	1606.55	219.14	952.68	1089.14	836.52	1506.89	1077.46	921.69	1208.36	765.36	730.93	897.14	947.95	1355.82	905.17	1081.33	1010.54	759.42	722.06	1784.42	1082.99	1710.95	926.08	981.27	237.15	1441.17	746.48	1181.26	889.05	667.7	866.84	864.93	677.58	487.56	680.22	531.66	1235.72	1356.08	1483.55	775.55	971.76	1286.66	1129.21	665.61	433.77	1766.62	1598.19	1756.17	1036.59
MAGEA1	100	100	100	100	100	100	100	100	100	100	100	100	100	100	100	100	100	100	100	100	100	100	100	100	100	100	100	100	100	100	100	100	100	100	100	100	100	100	100	100	100	100	100	100	100	100	100	100	100
MAGEA12	100	100	100	100	100	100	100	100	100	100	100	100	100	100	100	100	100	100	100	100	100	100	100	100	100	100	100	100	100	100	100	100	100	100	100	100	100	100	100	100	100	100	100	100	100	100	100	100	100
MAGEA3	100	100	100	100	100	100	100	100	100	100	100	100	100	100	100	100	100	100	100	100	100	100	100	100	100	100	100	100	100	100	100	100	100	100	100	100	100	100	100	100	100	100	100	100	100	100	100	100	100
MAGEA4	100	100	100	100	100	100	100	100	100	100	100	100	100	100	100	100	100	100	100	100	100	100	100	100	100	100	100	100	100	100	100	100	100	100	100	100	100	100	100	100	100	100	100	100	100	100	100	100	100
MAGEB2	100	100	100	100	100	100	100	100	100	100	100	100	100	100	100	100	100	100	100	100	100	100	100	100	100	100	100	100	100	100	100	100	100	100	100	100	100	100	100	100	100	100	100	100	100	100	100	100	100
MAGEC1	100	100	100	100	100	100	100	100	100	100	100	100	100	100	100	100	100	100	100	100	100	100	100	100	100	100	100	100	100	100	100	100	100	100	100	100	100	100	100	100	100	100	100	100	100	100	100	100	100
MAGEC2	100	100	100	100	100	100	100	100	100	100	100	100	100	100	100	100	100	100	100	100	100	100	100	100	100	100	100	100	100	100	100	100	100	100	100	100	100	100	100	100	100	100	100	100	100	100	100	100	100
MAP2K1	262.85	425.4	302.42	312.23	282.9	273.62	373.56	363.93	316.5	362.38	334.93	534.01	322.26	506.17	341.37	480.7	370.68	260.54	356.71	100	462.68	327.78	379.25	399.61	548.67	372.45	324.09	358.81	369.21	406.37	450.93	406.92	395.63	412.18	393.87	386.85	480.21	371.53	426.77	396.98	359.56	400.14	383.61	427.63	608.42	434.17	516.51	427.44	324.33
MAP2K2	982.35	914.19	980.6	895.51	806.52	895.8	818.51	693.65	1097.89	892.91	890.33	960.16	852.41	864.35	878.23	723.1	762.25	843.2	844.96	1130.79	949.67	843.44	674.21	806.55	610.97	1066.16	781.29	736.88	689.28	676.86	1121.86	797.04	649.57	731.15	673.33	696.44	741.62	943.68	1026.29	1037.48	1072.81	1086.59	1511.02	1282.88	801.68	1003.08	1089.17	1249.2	1278.25
MAP2K4	265.39	214.02	299.33	260.87	284.27	311.63	287.44	255.39	266.27	223.2	249.59	203.99	277.87	100	258.76	248.93	276.27	212.83	256.94	100	100	100	249.52	269.33	100	243.18	233.98	100	100	100	205.77	100	100	100	100	100	265.24	100	100	214.86	200.93	222.49	216.12	100	210.44	100	100	100	100
MAP3K1	314.27	419.03	310.71	437.44	387.22	447.98	435.66	449.17	463.88	485.5	453.65	446.44	530.75	451.01	416.49	326.81	301.72	392.01	422.66	100	405.5	363.85	397.17	270.29	655.18	355.81	406.52	100	309.77	344.04	535.21	351.17	287.07	398.78	399.8	438.15	394.13	516.42	406.45	427.68	472.37	438.08	659.16	739.98	634.19	467.86	381.77	513.6	486.5
MAP3K5	474.03	641.19	554.99	434.64	451.45	605.76	478.38	667.42	657.18	565.49	703.54	410.12	592.74	463.19	512.41	592.63	541.1	350.38	474.63	723.26	580.78	475.27	643.25	580.96	584.84	433.89	338.94	419.5	618.26	100	525.36	551	658.45	524.69	599.26	373.13	729.86	683.61	586.81	667.1	733.23	467.4	837.45	554.05	698.61	535.23	434.17	636.2	782.21
MAP3K7	356.47	534.83	437.14	385.91	414.85	394.39	432.87	473.28	452.35	456.87	397.46	383.42	393.82	486.6	344.97	444.62	429.78	387.92	345.71	100	397.16	474.83	437.89	440.65	476.31	407.01	345.59	321.32	455.9	412.12	418.1	457.34	520.95	382.63	432.38	388.94	551.74	464.41	467.42	409.26	413.62	441.53	500.67	472.25	549.73	396.74	482.83	374.43	407
MAP4K2	100	125.98	114.68	100	100	100	126.47	100	100	102.54	100	143.12	100	100	111.6	100	100	100	100	100	100	100	100	100	100	170.23	111.61	100	154.97	100	203.58	100	100	100	136.86	100	100	100	100	100	159.81	193.17	100	100	100	100	100	100	100
MAPK1	562.9	762.13	591.54	589.9	609.46	601.75	601.22	633.95	641.07	811.94	644.79	617.32	614.23	760.93	700.8	860.37	898.57	568.93	612.66	100	585.95	559.43	693.91	682.42	600.92	405.73	645.62	719.59	688.89	768.16	409.34	782.47	937.52	765.48	862.66	758.47	1000.1	419.83	312.46	384.71	368.96	403.59	378.21	409.03	635.62	419.2	100	341.29	317.97
MAPK11	100	100	100	100	100	100	100	100	100	100	100	100	100	100	100	100	100	100	100	100	100	100	100	100	100	100	100	100	100	100	100	100	100	100	100	100	100	100	100	100	100	100	100	100	100	100	100	100	100
MAPK14	513.53	466.17	571.48	533.53	603.98	604.6	443.83	546.69	558.68	516.43	592.31	563.92	511.83	630.69	438.29	531.01	526.45	502.1	526.8	691.57	559.15	494.39	477.35	497.23	560.72	628.43	514.04	455.06	520.11	483.33	610.73	512.95	463.91	440.08	468.31	478.39	524.96	739.34	713.83	667.1	674.47	714.04	779.82	680.48	641.35	756.06	673.71	712.41	712.26
MAPK3	391.85	354.33	409.89	466.98	469.59	331.73	408.91	339.71	362.4	633.23	497.14	484.88	452.79	526.48	390.52	468.43	427.51	451.77	466.43	100	396.31	425.37	400.44	376.5	337.64	403.17	357.37	294.81	414.65	345.14	434.51	355.02	342.83	482.66	420.45	497.98	467.81	460.7	431.85	415.4	344.29	481.2	399.82	375.57	416.59	100	400.48	424.13	324.33
MAPK8	204.09	170.3	202.42	224.44	177.31	203.89	224.68	188.39	195.04	212.17	182.75	274.48	190.77	100	208.25	249.85	242.57	184.33	179.42	100	100	100	198.57	200.57	263.28	293.1	234.49	243.59	100	100	280.19	197.4	268.65	100	204.48	199.45	255.56	100	100	235.33	210.33	248.36	226.92	100	227.62	100	100	100	100
MAPKAPK2	548.21	455.47	494.27	473.62	535.87	493.88	385.89	539.56	557.05	441.95	450.97	447.5	502.85	661.01	449.22	615.57	571.87	456.4	469.92	100	434.87	382.77	347.23	400.37	345.68	471	386.55	338.91	348.93	396.24	499.09	372.41	474.1	278.59	385.61	327.21	497.19	505.28	566.49	525.9	467.67	505.35	624.94	409.03	435.2	699.91	580.14	566.61	597.79
MARCO	100	100	100	100	100	100	100	100	100	100	100	100	100	100	100	100	100	100	100	100	100	100	100	100	100	100	100	100	100	100	100	100	100	100	100	100	100	100	100	100	100	100	100	100	100	100	100	100	100
MASP1	100	100	100	100	100	100	100	100	100	100	100	100	168.74	100	100	100	100	100	100	100	100	100	100	100	100	136.95	100	100	100	100	100	100	100	100	100	100	100	100	100	100	100	100	100	100	100	100	100	100	100
MASP2	100	100	100	100	100	100	100	100	100	100	100	100	100	100	100	100	100	100	100	100	100	100	100	100	100	100	100	100	100	100	100	100	100	100	100	100	100	100	100	100	100	100	100	100	100	100	100	100	100
MAVS	806.19	530.03	776.67	696.69	806.21	883.06	661.33	615.91	699.27	620.82	695.17	610.91	727.16	507.07	621.83	536.65	618.36	724.09	797.81	830.67	621.47	710.59	603.31	642.79	532.59	888.25	920.04	654.25	646	618.06	783.66	492.91	569.04	558.92	674.82	564.48	589.05	995.7	848.47	836.94	725	888.24	754.61	721.39	691.45	647.51	655	921.16	817.19
MBL2	100	100	100	100	100	100	100	100	100	100	100	100	100	100	100	100	100	100	100	100	100	100	100	100	100	100	100	100	100	100	100	100	100	100	100	100	100	100	100	100	100	100	100	100	100	100	100	100	100
MCAM	100	198.66	141.17	100	100	100	100	217.37	100	372.3	100	195.45	190.72	100	146.93	138.21	174.77	208.47	208.14	100	100	100	245.14	100	100	131.83	104.45	100	100	100	129.15	100	100	100	229.9	100	100	471.84	100	341.73	178.61	241.46	199.91	100	100	100	100	100	100
MCL1	1149.04	2709.53	2215.04	1620.89	1153.57	1435.52	1378.57	3031.9	1980.24	1627.1	2014.66	943.07	2001.12	1874.11	1038.12	1653.96	1161.39	1076.65	1138.14	1380.69	1379.72	1395.71	1438.89	2647.1	1143.56	1172.39	1289.7	1426.62	1637.6	1726.73	1421.75	2179.84	2392.01	1324.64	1779.31	1414.39	1981.6	1645.87	1300.64	2113.84	1695.59	1352.2	2353.88	1297.75	2230.4	1583.22	1018.05	1341.98	3128.85
MEF2C	348.99	401.23	245.53	352.68	298.47	447.54	252.92	480	410.29	469.82	422.02	326.82	270.97	100	214.68	433.8	288.7	270.54	285.15	100	338.36	100	373.38	298.83	253.23	216.3	228.35	100	399.24	100	275.81	264.8	376.59	451.59	323.9	306.86	372.52	100	406.45	349.92	313.74	389.79	291.76	100	362.19	404.23	100	337.98	467.42
MEFV	100	100	100	100	100	100	100	100	100	100	100	100	100	100	100	100	100	100	100	100	100	100	100	100	100	100	100	100	100	100	100	100	100	100	100	100	100	100	100	100	100	100	100	100	100	100	100	100	100
MERTK	318.12	424.22	405.86	251.56	236.79	366.33	282.72	458.83	347.01	258.3	395.65	278.76	308.74	100	204.48	337.17	349.56	212.89	315.72	100	100	100	340.88	616.83	349.7	277.74	237.56	330.87	629.69	657.35	315.21	509.04	459.3	100	672.72	225.8	342.48	579.58	378.51	558.64	378.36	275.96	270.15	405.31	899.03	100	100	100	670.92
MFGE8	286.06	724.64	432.11	362.86	378.89	318.16	401.41	310.84	467	591.73	544.87	1028.51	311.62	274.88	272.52	320.1	335.92	380.79	327.36	462.95	478.62	765.1	642.14	463.69	1083.26	961.21	252.41	260.08	405.67	473	632.62	662.93	314.42	734.75	734.09	528.14	432.3	1749.9	736.69	922.89	827.23	903.76	828.45	1193.63	1537.51	917	744.82	732.29	769.49
MICA	100	100	233.22	100	222.78	100	100	100	100	197.18	100	100	100	100	181.54	152.93	100	202.79	245.13	100	100	100	100	100	100	100	197.63	100	100	100	214.52	100	100	100	100	100	100	100	100	274.21	269.08	220.77	181.9	100	183.24	100	100	100	100
MICB	100	100	100	100	100	100	100	100	100	100	100	100	100	100	100	100	100	100	100	100	100	100	100	100	100	100	100	100	100	100	100	100	100	100	100	100	100	100	100	100	118.68	100	100	100	100	100	100	100	100
MIF	3363.96	2158.82	2894.89	2663.6	2273.77	3004.88	2106.8	1865.63	2681.4	2389.6	1856.75	2702.11	2572.53	2736.57	3457.94	2415.26	2568.03	2872.62	2742.86	3152.41	3312.67	3246.29	1732.73	2851.65	1121.45	4160.97	2615.23	3102.39	1446.84	2283.68	3065.68	2448.69	1528.41	1913.47	1649.12	1957.69	2326.86	2764.17	3457.37	2969.2	1943.52	2985.53	3108.49	3566.03	1745.09	3080.36	3563.18	3740.97	2791.8
MME	3423.91	100	2025.35	2010.87	1119.63	2657.92	912.54	1241.44	1622.11	1359.67	576.1	1938.47	997.1	2685.6	1525.97	1906.52	2241.06	1412.6	1464.5	3113.24	1620.43	3405.43	1000.9	1263.5	100	2161.76	1118.18	3235.62	765.9	1536.2	910.62	568.6	1263.73	452.76	555.22	394.66	1701.01	1939.38	2126.25	1033.39	1083.39	1662.65	457.45	371.85	254.82	1897.62	2919.41	2163.73	655.02
MMP7	893.5	1711.06	909.11	353.23	427.35	599.79	998.52	4098.66	2632.01	1035.28	3327.87	429.35	2774.23	3668.16	2027.37	2821.19	645.59	700.73	244.43	2388.9	5646.48	800.75	5119.77	3096.67	2381.57	327.66	133.12	530.46	1621.61	848.05	946.74	7625.3	2334.89	874.3	4360.76	2350.21	7577.27	761.63	485.2	681.42	1652.11	1745.44	7594.72	1245.69	11643	883.31	419.2	1454.64	2461.1
MNX1	100	100	100	100	100	100	100	100	100	100	100	100	100	100	100	100	100	100	100	100	100	100	100	100	100	100	100	100	100	100	100	100	100	100	100	100	100	100	100	100	100	100	100	100	100	100	100	100	100
MPPED1	100	100	100	100	100	100	100	100	100	100	100	100	100	100	100	100	100	100	100	100	100	100	100	100	100	100	100	100	100	100	100	100	100	100	100	100	100	100	100	100	100	100	100	100	100	100	100	100	100
MR1	100	100	100	100	100	100	100	100	100	100	100	100	100	100	100	100	100	100	100	100	100	100	100	100	100	100	100	100	100	100	100	100	100	100	100	100	100	100	100	100	100	100	100	100	100	100	100	100	100
MRC1	134.26	182.93	209.07	100	100	173.7	236.72	223.14	238.74	280.09	327.11	137.78	307.56	100	134.98	248.8	131.39	100	113.92	100	364.61	100	314.7	295.47	317.54	136.95	109.57	100	335.23	291.5	200.29	514.92	252.58	237.22	596.55	196.08	304.19	100	100	100	404.21	100	207.11	100	896.17	100	100	100	100
MS4A1	100	100	100	100	100	100	100	100	100	100	100	100	100	100	100	100	100	100	100	100	100	100	100	100	100	100	100	100	100	100	100	100	100	100	100	100	100	100	100	448.14	100	100	100	100	100	100	100	100	100
MS4A2	100	100	100	100	100	100	100	100	100	100	100	100	100	100	100	100	100	100	100	100	100	100	100	100	100	100	100	100	100	100	100	100	100	100	100	100	100	100	100	100	100	100	100	100	100	100	100	100	100
MSR1	100	261.58	263.14	100	100	100	198.14	744.44	288.87	222.82	175.96	100	286.35	100	100	138.88	100	100	100	100	100	100	263.84	471.85	269.31	142.07	100	100	263.16	100	275.81	379.79	427.11	100	255.55	100	268.96	100	325.16	100	408.91	100	228.72	100	536.84	100	100	100	766.31
MST1R	100	100	100	100	100	100	100	100	100	100	100	100	100	100	100	100	100	100	100	100	100	100	100	100	100	100	100	100	100	100	100	100	100	100	100	100	100	100	100	100	100	100	100	100	100	100	100	100	100
MUC1	1454.11	2389.77	1451.4	1271.25	1327.29	1551.74	1646.42	1122.94	1660.69	1163.48	2603.23	866.17	1973.22	1445.84	1475.12	1063.55	1264.69	1657.26	1376.52	1598.93	2465.68	1431.94	2014.48	1792.22	1732.42	903.61	1543.13	1531.13	2234.5	1960.7	1715.08	2184.18	1498.23	1382.33	1757.51	2121.83	1190.48	668.75	894.19	1025.2	880.11	976.2	1113	2271.99	1816.67	452.88	958.17	1100.09	1116.08
MX1	440.92	8073.02	7486.65	2681.31	1675.46	639.36	5837.1	9348.9	839.4	4171.96	1795.34	377.01	4220.97	2469.56	324.37	5490.84	322.95	431.19	513.9	630.4	479.1	605.26	2373.15	8050.97	584.84	1453.97	266.75	543.71	2039.68	4077.36	3197.02	874.85	1837.91	1406.01	565.53	568.13	1562.73	4614.38	2189.75	5148.52	5380.52	3632.3	2728.48	8864.87	5714.85	5790.18	4772.12	6312.26	15459.8
Mx2	100	951.83	639.24	353.12	261.94	100	526.2	1204.9	184.54	518.61	362.2	100	403.7	100	100	570.81	100	100	120.47	100	100	100	337.28	916.75	100	188.15	100	100	260.16	389.84	399.49	100	274.38	274.36	100	100	288.82	951.11	426.77	652.77	635.7	484.65	545.7	777.16	473.85	741.08	426.68	533.48	1694.79
MYD88	196.89	270.67	452.57	236.43	215.21	263.09	250.28	545.72	294.69	286.05	310.11	195.45	372.73	100	215.56	306.57	191.01	186.51	196.48	100	100	100	273.05	445.49	100	287.98	180.73	100	256.8	100	337.1	248.72	365.49	249.39	212.28	100	330.06	531.29	429.31	480.88	502.92	379.44	536.69	100	346.44	591.37	100	420.82	848.99
NCAM1	100	191.08	100	100	100	100	100	100	100	130.65	149.47	116.42	100	100	100	100	100	127.63	155.76	100	100	100	100	100	299.46	100	100	100	100	100	100	100	100	323.93	100	265.7	100	100	100	100	100	100	100	100	100	100	100	100	100
NCF4	100	100	100	100	100	100	100	100	100	100	100	100	100	100	100	100	100	100	100	100	100	100	100	100	100	100	100	100	100	100	100	100	100	100	100	100	100	100	100	100	117.5	100	100	100	100	100	100	100	100
NCR1	100	100	100	100	100	100	100	100	100	100	100	100	100	100	100	100	100	100	100	100	100	100	100	100	100	100	100	100	100	100	100	100	100	100	100	100	100	100	100	100	100	100	100	100	100	100	100	100	100
NEFL	100	100	100	100	100	100	100	100	100	100	100	159.14	100	100	100	100	100	100	100	100	100	100	100	100	100	142.07	100	100	100	100	122.58	100	100	100	100	100	100	100	100	100	100	100	100	100	100	100	100	100	100
NFATC1	100	100	100	100	100	100	100	100	100	100	100	100	100	100	100	100	100	100	100	100	100	100	100	100	100	100	100	100	100	100	100	100	100	100	100	100	100	100	100	100	100	100	100	100	100	100	100	100	100
NFATC2	100	180.51	124.55	100	100	100	100	255.43	100	140.8	216.35	100	193.81	100	100	100	100	100	100	100	100	100	112.5	152.01	219.06	135.67	102.91	100	219.17	100	222.18	100	199.87	100	165.13	100	100	100	100	218.96	231.48	100	277.35	100	264.84	100	100	100	432.44
NFATC3	354.24	397.89	381.65	322.22	305.18	333.72	383.79	391.98	348.21	387.55	314.09	304.39	342.8	100	284.2	356.46	473.52	267.98	325.97	100	100	100	339.43	310.51	373.82	344.29	297.98	351.51	439.99	371.42	271.43	309.55	466.26	318.39	342.27	278.47	416.67	375.24	292.14	329.46	392.46	332.87	334.98	412.75	392.25	100	100	100	352.95
NFATC4	100	243.43	100	100	100	100	100	100	100	309.35	100	100	193.36	100	100	100	100	100	100	100	100	100	100	100	200.98	100	128.51	100	100	100	152.13	100	100	100	100	100	100	100	100	100	196.23	100	234.13	100	148.88	100	100	100	100
NFKB1	100	100	100	100	100	100	100	100	100	100	100	100	100	100	100	186.83	100	100	100	100	100	100	100	100	100	100	100	100	100	100	100	100	100	100	100	100	100	100	100	100	100	100	100	100	100	100	100	100	100
NFKB2	252.86	310.59	362.7	283	213.79	263.14	270.72	554.26	480.42	257.58	477.84	100	446.57	100	250.92	302.34	100	181.27	242.54	100	362.94	100	263.34	290.83	207.01	129.27	138.24	100	244.91	100	303.18	253.91	488.36	100	100	278.32	344.19	100	279.43	259.88	294.94	281.13	533.09	100	181.81	100	100	100	454.7
NFKBIA	769.78	1514.47	1185.95	1168.67	1075.74	981.26	1278.67	1363.84	1196.94	1259.14	1801.68	964.43	1155.34	1301.86	989.35	1114.54	1029.33	808.72	1277.8	1484.27	1242.39	972.18	1160.13	1886.29	1236.01	953.53	966.63	972.82	1817.46	2513.88	1282.75	1872.09	1071.06	1477.72	1592.08	1051.76	1253.69	1597.57	1206.65	1716.85	1404.18	1134.88	1700.12	1450.21	1866.78	1179	733.6	1156.42	1640.74
NLRC5	100	118.1	123.63	100	100	100	100	200.4	100	131.22	126.94	100	133.62	100	100	104.79	100	100	100	100	100	100	115.61	100	100	100	100	100	100	100	172.93	100	100	100	100	100	100	100	100	337.64	246.76	100	203.51	100	153.18	100	100	100	384.75
NLRP3	100	100	100	100	100	100	100	100	100	100	100	100	100	100	100	100	100	100	100	100	100	100	100	100	100	100	100	100	100	100	100	100	100	100	100	100	100	100	100	100	100	100	100	100	100	100	100	100	100
NOD1	100	100	100	100	100	100	100	100	100	100	100	100	100	100	100	100	100	100	100	100	100	100	100	100	100	100	100	100	100	100	111.64	100	100	100	100	100	100	100	100	100	152.76	100	252.14	100	100	100	100	100	100
NOD2	100	100	100	100	100	100	100	100	100	100	100	100	100	100	100	100	100	100	100	100	100	100	100	100	100	100	100	100	100	100	100	100	100	100	100	100	100	100	100	100	100	100	100	100	100	100	100	100	100
NOS2A	100	100	100	100	100	100	100	100	100	100	100	100	100	100	100	100	100	100	100	100	100	100	100	100	100	100	100	100	100	100	100	100	100	100	100	100	100	100	100	100	100	100	100	100	100	100	100	100	100
NOTCH1	420.31	481.03	498.83	418.76	642.19	567.16	391.79	381.65	416.52	594.95	484.6	136.71	410.61	100	391.38	511.29	533.06	663.73	533.06	100	506.03	100	433.93	329.21	100	154.87	386.04	100	423.44	100	139	343.97	100	100	396.2	469.37	295.21	100	100	100	190.36	219.04	100	100	100	100	100	100	100
NPHS1	917.38	100	389.98	744.68	270.63	1025.9	193.92	296.46	649.88	341.29	100	693.15	100	100	216.32	736.66	863.56	167.62	286.79	846.26	316.02	1004.61	100	310.12	100	515.8	564.21	934.76	359.48	388.46	279.1	100	373.6	100	100	100	611.8	561.01	1092.34	268.07	329.01	463.96	100	100	100	100	684.94	414.19	100
NPHS2	1316.07	100	526.66	1449.26	234.88	897.28	373.42	710.89	926.01	706.08	100	337.5	148.29	343.03	346.14	1337.87	669.71	168.3	297.23	1057.18	333.58	912.25	169.48	506.83	100	421.09	301.56	700.34	873.42	632.98	394.02	100	341.72	100	213.43	100	1163.68	601.88	1351.45	229.19	358.39	529.5	100	100	100	475.34	1107.88	662.7	100
NRP1	1944.88	1066.95	1779.96	1478.62	2116.62	1665.27	1639.41	2912.6	2289.16	2226.2	2149.13	1448.25	2237.42	1997.17	1550.25	1830.66	1008.08	1686.15	1463.06	3268.43	2514.52	2844.58	2435.14	1877.33	1670.12	1878.9	1305.06	1188.48	2303.48	1187.93	2057.65	2220.77	2235.21	1861.55	1884.17	1724.48	2999.65	2615.56	3172.86	1964.46	2794.25	2764.76	5433.55	2063.76	2055.74	2563.85	1953.76	2455.32	3469.08
NT5E	265.51	247.47	387.76	268.03	234.81	325.56	343.68	423.7	477.35	392.44	212.54	270.21	286.88	391.39	271.59	409.06	303.97	306.9	232.54	100	100	502.07	353.59	455.08	100	317.42	460.28	444.67	100	368.02	149.95	429.26	384.99	100	100	250.53	528.51	416.11	284.52	272.16	509.97	348.4	399.82	100	221.89	827.17	561.43	371.11	100
NUP107	229.27	261.45	244.77	198.29	241.17	237.69	265.69	275.57	247.03	260.99	248.47	227.49	296.22	100	247.86	286.32	212.04	211.36	203.46	100	100	100	261.03	230.51	335.63	206.06	212.99	220.76	311.18	100	256.11	237.93	360.22	100	254.5	272.56	361.15	100	100	239.42	289.06	243.19	333.18	100	292.04	100	100	100	100
OAS3	100	1531.32	710.88	488.06	333.12	100	911.29	1345.8	202.24	603.42	357.17	100	600.05	100	100	593.89	100	100	100	100	100	100	356.58	1058.73	100	250.86	100	100	238.42	647.16	651.23	100	288.55	206.17	100	100	235.61	772.78	406.45	744.86	862.48	569.16	347.59	1360.97	707.2	662.48	587.63	735.6	1971.43
OSM	100	100	100	100	100	100	100	100	100	100	100	100	100	100	100	100	100	100	100	100	100	100	100	100	100	100	100	100	100	100	100	100	100	100	100	100	100	100	100	100	100	100	100	100	100	100	100	100	100
PASD1	100	100	100	100	100	100	100	100	100	100	100	100	100	100	100	100	100	100	100	100	100	100	100	100	100	100	100	100	100	100	100	100	100	100	100	100	100	100	100	100	100	100	100	100	100	100	100	100	100
PAX5	100	100	100	100	100	100	100	100	100	100	100	100	100	100	100	100	100	100	100	100	100	100	100	100	100	100	100	100	100	100	100	100	100	100	100	100	100	100	100	100	100	100	100	100	100	100	100	100	100
PBK	100	100	100	100	100	100	100	100	100	100	100	100	100	100	100	100	100	100	100	100	100	100	100	100	100	100	100	100	100	100	100	100	100	100	100	100	100	100	100	100	100	100	100	100	100	100	100	100	100
PDCD1	100	100	100	100	100	100	100	100	100	100	100	100	100	100	100	100	100	100	100	100	100	100	100	100	100	100	100	100	100	100	100	100	100	100	100	100	100	100	100	100	100	100	100	100	100	100	100	100	100
PDCD1LG2	100	100	100	100	100	100	100	100	100	100	100	100	100	100	100	100	100	100	100	100	100	100	100	100	100	100	100	100	100	100	100	100	100	100	100	100	100	100	100	100	100	100	100	100	100	100	100	100	100
PDGFC	344.61	247.92	368.93	313.93	242.13	340.95	254.89	368.31	662.22	356.2	321.04	231.76	439.06	427.5	354.3	412.67	405.68	279.12	269.53	100	100	411.63	390.58	457.83	317.54	349.41	232.44	342.22	337.81	100	271.43	389.02	479.81	330.95	401.13	330.81	493.65	100	294.68	349.92	472.37	370.82	524.08	100	389.39	100	100	100	100
PDGFRB	901.58	644.74	621.81	625.37	941.98	940.31	831.78	850.47	1093.76	1165.72	989.34	1190.85	722.09	725.5	631.23	1330.29	964.38	555.75	689.41	948.25	862.92	721.31	1194.28	783.01	1913.3	741.06	537.59	571.36	1075.74	681.29	1059.47	1148.88	990.09	1233.16	1076.97	1072.38	1050.31	1289.2	1265.08	742.81	1217.34	1329.77	1487.61	1052.33	1328.5	1317.48	995.59	1050.39	705.9
PECAM1	1120.67	1570.2	1334.29	1181.79	1410.75	1388.85	1245.25	1902.51	1350.19	1459.88	1393.4	1075.5	1182.59	1238.84	706.13	1713.27	1123.91	745.74	927.42	1961.02	1151.9	1135.23	1517.88	1633.61	868.22	755.14	696.82	892.31	2273.12	1201.01	954.4	1669.3	1337.56	1954.44	1880.23	1071.85	1469.2	1683.02	1155.84	892.19	1110.42	995.18	920.3	1026.3	1530.36	1115.37	887.05	884.71	1294.15
PIK3CD	100	100	191.05	100	100	100	100	410.89	328.95	176.06	261.11	100	264.18	100	100	216.92	156.7	100	100	100	100	100	189.17	100	100	100	112.64	100	248.04	100	203.58	100	100	100	100	100	270.72	100	100	204.63	232.66	100	248.53	100	241.94	100	100	100	100
PIK3CG	100	100	100	100	100	100	100	142.17	100	100	100	100	100	100	100	100	100	100	100	100	100	100	100	100	100	100	100	100	100	100	129.15	100	100	100	100	100	100	100	100	100	171.56	100	100	100	157.47	100	100	100	100
PIN1	287.33	257.69	396.75	100	100	371.75	324.92	100	336.32	312.97	100	243.51	306.04	100	312.81	266.26	282.83	336.24	325.43	100	100	100	292.42	100	100	261.1	268.28	100	100	100	206.86	100	100	100	331.14	100	319.37	100	100	100	188.01	213.87	183.7	100	171.79	100	100	100	100
PLA1A	100	202	201.05	100	100	100	100	288.02	100	149.84	100	120.69	186.25	100	100	193.33	100	100	100	100	100	100	151.92	211.48	100	133.11	100	100	100	100	109.45	100	100	100	100	100	253.76	100	100	100	146.88	100	100	100	100	100	100	100	100
PLA2G1B	100	100	100	100	100	100	100	100	100	100	100	100	100	100	100	100	100	100	100	100	100	353.13	100	100	100	100	100	100	100	100	100	100	100	100	100	100	100	100	100	100	100	100	100	100	100	100	100	100	100
PLA2G6	548.94	291.08	416.1	368.58	512.69	521	325.38	359.28	483.07	330.6	429.39	201.86	382.34	100	348.68	322.24	292.44	378.86	464.9	719.44	407.85	588.13	415.5	361.77	100	300.78	335.35	100	357.04	100	313.03	272.43	100	100	244.86	389.82	100	100	393.75	313.09	280.84	322.53	376.4	100	196.13	100	100	374.43	346.59
PLAT	1700.15	1691.63	2360.33	2545.79	2093.22	2075.73	2090.29	2509.32	1571.76	2300.84	1987.54	1294.45	1060.18	1080.12	1059.9	2026.64	1964.94	1612.65	2278.64	2069.37	1297.26	1970.96	1548.17	2294.41	1493.26	1108.4	1684.95	1293.99	5085.84	2701.8	1693.19	1135.49	1464.27	3395.12	2637.2	1877.58	1752.55	2418.65	2039.88	1808.94	1244.37	1659.2	835.65	2182.75	1118.06	905.77	1815.28	1345.29	1224.19
PLAU	239.34	447.19	583.24	1266.55	1274.4	584.91	1435.07	457.88	455.24	1635.51	719.48	1231.44	776.82	392.71	1006.84	655.66	550.8	1200.5	1572.63	100	941.93	830.89	411.23	657.61	1561.59	958.65	1346.02	760.86	270.82	1037.83	906.24	527.36	686.24	1684.48	1044.72	1677.51	358.4	100	284.52	748.95	345.46	1036.57	381.81	881.28	389.39	100	531.48	374.43	407
PLAUR	100	100	100	100	100	100	100	135.76	100	100	100	100	100	100	100	100	100	100	100	100	100	100	100	100	100	100	100	100	100	100	100	100	100	100	100	100	100	100	100	100	100	100	100	100	100	100	100	100	100
PMCH	100	100	100	100	100	100	100	100	100	100	100	100	100	100	100	100	100	100	100	100	100	100	100	100	100	100	100	100	100	100	100	100	100	100	100	100	100	100	100	100	100	100	100	100	100	100	100	100	100
PNMA1	327.1	358.02	296.68	337.52	306.92	393.62	320.63	269.78	277.89	425.9	310.07	299.05	356.99	389.07	361.82	337.72	341.34	323.32	339.11	100	425.74	448.92	310.33	335.76	251.22	331.5	296.44	341.76	311.17	348.76	292.23	341.62	341.37	318.26	296.81	280.36	379.2	100	264.19	347.87	262.03	451.88	354.79	390.44	273.43	100	100	100	100
POU2AF1	100	100	100	100	100	100	100	100	100	100	100	100	100	100	100	100	100	100	100	100	100	100	100	100	100	100	100	100	100	100	100	100	100	100	100	100	100	100	100	100	100	100	100	100	100	100	100	100	100
POU2F2	100	100	100	100	100	100	100	100	100	100	100	100	100	100	100	100	100	100	100	100	100	100	100	100	100	100	100	100	100	100	100	100	100	100	100	100	100	100	100	100	100	100	100	100	100	100	100	100	100
PPARG	100	100	100	100	100	100	100	100	100	100	100	100	100	100	100	100	100	100	100	100	100	100	100	100	100	100	123.39	100	100	100	100	100	100	100	100	100	100	100	100	100	119.85	100	100	100	100	100	100	100	100
PPBP	100	100	100	100	100	100	100	100	100	100	100	100	100	100	100	100	100	100	100	100	100	100	100	100	100	100	100	100	100	100	100	100	100	100	100	100	100	100	100	100	100	100	100	100	100	100	100	100	100
PRAME	100	100	100	100	100	100	100	100	100	100	100	100	100	100	100	100	100	100	100	100	100	100	100	100	100	100	100	100	100	100	100	100	100	100	100	100	100	100	100	100	100	100	100	100	100	100	100	100	100
PRF1	100	100	100	100	100	100	100	139.22	100	100	100	100	100	100	100	100	100	100	100	100	100	100	100	100	100	100	100	100	100	100	100	100	100	100	100	100	100	100	100	100	124.55	100	100	100	184.67	100	100	100	100
PRG2	100	100	100	100	100	100	100	100	100	100	100	100	100	100	100	100	100	100	100	100	100	100	100	100	100	100	100	100	100	100	100	100	100	100	100	100	100	100	100	100	100	100	100	100	100	100	100	100	100
PRKCD	348.33	194.04	517.49	331.7	345.78	352.7	326.46	488.51	263.37	282.65	388.33	327.88	324.79	100	402.82	365.99	322.64	276.55	350.02	100	100	100	293.23	539.99	100	308.46	410.61	485.87	396.6	484.31	227.66	389.47	336.65	100	287.09	277.03	370.34	100	452.18	394.94	294.94	298.38	219.72	100	227.62	100	100	100	384.75
PRKCE	100	100	100	100	100	100	121.89	100	100	100	100	168.75	107.67	100	145.42	145.76	100	100	104.64	100	100	100	100	100	100	300.78	100	100	100	100	190.44	100	100	100	100	100	148.28	100	100	100	196.23	232.84	181.9	100	100	100	100	100	100
PRM1	100	100	100	100	100	100	100	100	100	100	100	100	100	100	100	100	100	100	100	100	100	100	100	100	100	100	100	100	100	100	100	100	100	100	100	100	100	100	100	100	100	100	100	100	100	100	100	100	100
PSEN1	174.03	235.25	312.98	210.53	208.97	213.74	288.07	376.02	255.37	287.11	271.62	384.49	296.62	338.6	250.96	376.83	216.92	228.55	212.27	100	307.62	100	322.34	300.25	506.46	358.37	292.86	270.5	285.75	297.15	295.51	354.4	456.57	279.14	364.04	280.21	435.93	100	307.38	339.69	348.99	305.28	302.56	100	528.25	407.97	100	357.86	100
PSEN2	255.39	206.55	212.01	100	263.82	100	267.6	317.78	100	311.83	100	152.73	169.08	100	163.05	295.62	215.9	265.51	100	100	100	100	248.9	100	100	140.79	129.02	100	100	100	168.55	100	100	100	100	100	375.1	100	100	100	173.91	201.79	100	100	168.93	100	100	100	100
PSMB10	100	110.75	131.44	100	100	100	132.86	248.94	100	129.72	171.11	144.18	201.03	100	100	120.77	100	100	100	100	206.25	100	163.47	221.91	100	250.86	101.37	100	155.79	100	290.04	179.91	185.14	100	100	153.63	175.24	100	317.54	356.06	310.21	307	383.61	405.31	274.86	100	100	341.29	594.61
PSMB7	746.5	709.08	1032.47	784.75	699.79	814.1	790.14	912.72	891.49	873.77	690.96	1454.65	854.52	1170.08	920.37	1098.9	1149.15	778.31	770.68	826.72	881.13	844.97	736.38	944.16	940.57	1139.12	952.81	1081.88	725.54	935.94	1078.08	1090.87	1151.99	751.33	923.23	794.64	1303.47	899.1	815.44	976.09	981.16	1022.77	1057.17	1063.49	1219.7	1201.45	1512.11	1279.02	1068.39
PSMB8	374.86	1074.53	991.31	700.79	572.53	498.05	957.81	1607.42	705.42	805.19	721.53	519.06	1128.64	1223.25	376.39	899.6	381.09	320.61	409.96	631.75	629.33	383.38	877.37	1275.2	751.65	753.86	287.23	413.02	904.82	1109.76	1122.95	1056.82	866.26	838.98	520.25	573.74	999.98	1114.59	886.57	1012.92	1169.17	927.91	1131.01	1431.62	1712.17	1310	1055.48	1418.19	1834.7
PSMB9	193.26	468.11	467.26	268.75	223.01	267.06	411.91	833.74	440.12	339.5	434.47	126.03	414.71	454.66	116.18	390.12	144.19	130.07	154.69	100	318.29	100	406.61	554.96	283.38	360.93	114.69	100	502.08	591.18	494.71	345.64	415.22	322.13	188.23	247.56	368.25	635.31	513.14	534.09	629.82	408.76	536.69	661.89	780.21	793.48	452.88	626.26	957.1
PSMD7	805.66	816.19	798.48	658.05	658.57	837.49	720.21	1018.88	853.4	736.48	654.03	813.84	773.09	1020.36	760.63	942.18	904.78	699.25	592.88	1066.3	797.84	784.75	899.04	898.61	661.21	851.14	646.13	696.37	894.88	751.69	773.81	946.47	1021.36	639.52	664.35	666.23	1032.81	854.52	769.72	765.32	780.23	755.44	994.14	795.76	858.95	1164.03	943.19	835.01	1119.26
PTGDR2	100	100	100	100	100	100	100	100	100	100	100	100	100	100	100	100	100	100	100	100	100	100	100	100	100	100	100	100	100	100	100	100	100	100	100	100	100	100	100	100	100	100	100	100	100	100	100	100	100
PTGS2	100	100	100	100	100	100	100	100	100	100	100	100	100	100	100	100	100	100	100	100	100	100	100	100	100	100	100	100	100	100	100	100	100	100	100	100	100	100	100	100	100	100	100	100	100	100	100	100	100
PTPRC	100	100	226.63	231.6	100	100	261.39	841.92	236.57	228.14	509.44	100	325.36	484.97	100	277.72	100	100	100	100	100	100	226.91	397.91	261.27	200.95	100	100	266.56	100	291.14	311.27	420.78	100	226.78	100	388.58	475.56	100	239.42	282.01	100	387.21	100	422.32	381.77	100	100	572.35
PVR	292.66	328.45	312.97	355.97	393.58	364.16	318.39	374.91	378.13	292.01	297.17	299.05	355.74	100	335.51	288.27	234.7	288.43	355.42	100	351.97	357.21	274.94	338.45	273.33	325.1	326.14	280.86	211.72	332.86	330.54	341.73	268.55	235.99	264.33	262.99	227.53	100	401.37	392.89	383.06	346.67	461.05	371.85	319.24	100	378.03	463.89	546.91
PYCARD	100	100	100	100	100	100	100	100	100	100	100	100	100	100	100	100	100	100	100	100	100	100	100	100	100	100	100	100	100	100	100	100	100	100	100	100	100	100	100	100	100	100	100	100	100	100	100	100	100
RAG1	100	100	100	100	100	100	100	100	100	100	100	100	100	100	100	100	100	100	100	100	100	100	100	100	100	100	100	100	100	100	100	100	100	100	100	100	100	100	100	100	100	100	100	100	100	100	100	100	100
REL	100	117.92	100	100	100	100	100	100	100	100	100	100	100	100	100	100	100	100	100	100	100	100	100	100	100	100	100	100	100	100	121.49	100	100	100	100	100	100	100	100	100	131.6	100	100	100	100	100	100	100	100
RELA	100	100	100	100	100	100	100	100	100	100	100	100	182.86	100	175.9	100	100	100	100	100	100	100	100	100	100	100	130.04	100	100	100	111.64	100	100	100	100	100	100	100	100	100	100	100	100	100	100	100	100	100	100
RELB	100	100	100	100	100	100	100	100	100	100	100	100	100	100	100	100	100	100	100	100	100	100	100	100	100	100	100	100	100	100	100	100	100	100	100	100	100	100	100	100	100	100	100	100	100	100	100	100	100
REPS1	619.01	454.22	427.76	456.17	469.95	592.5	502.22	417.17	558.75	564.83	424.09	364.2	406.88	483.49	409.71	587.9	659.89	428.12	467.73	100	355.89	449.94	397.15	408.43	351.71	341.73	425.46	469.29	461.92	392.46	376.51	437.27	511.2	448.43	501.43	438.47	683.72	393.82	370.89	341.73	311.39	320.8	311.57	100	345.01	100	100	434.07	359.31
RIPK2	100	104.23	100	100	100	100	100	100	100	100	100	100	100	100	100	100	100	100	100	100	100	100	100	100	100	100	100	100	100	100	100	100	100	100	100	100	100	100	100	100	137.48	100	214.32	100	157.47	100	100	100	100
ROPN1	100	100	100	100	100	100	100	100	100	100	100	100	100	100	100	100	100	100	100	100	100	100	100	100	100	100	100	100	100	100	100	100	100	100	100	100	100	100	100	100	100	100	100	100	100	100	100	100	100
RORA	429.35	432.21	601.8	529.38	420.97	634.85	396.63	338.88	334.35	469.93	331.19	330.02	367.45	100	379.47	409.44	377.48	466.41	501.16	100	100	503.27	347.5	382.96	267.3	385.25	652.78	696.27	330.16	378.51	306.46	342.7	442.77	370.82	338.61	257.39	301.91	419.83	342.94	482.93	338.41	417.39	183.7	100	324.97	100	100	364.49	100
RORC	175.02	100	212.96	219.2	146.11	144.92	176.05	100	100	161.98	100	263.8	100	100	242.87	142.14	219.37	184.75	174.06	100	100	100	100	127.68	100	217.58	268.79	149.73	100	243.51	100	100	191.05	100	100	100	184.53	100	100	100	169.21	100	100	100	150.32	100	100	100	100
RPS6	10948.5	8960.59	9405.48	10625.6	7443.84	11780.7	9283.61	6371.15	10380.4	8868.96	9997.29	12246	9195.15	19686.4	12453.9	9018.38	11157.7	10522.1	11564.3	12261.5	12440.4	11271.3	8107.18	8574.89	6706.59	13276.5	12304.6	10236.2	6731.75	6379.73	8835.87	10963.5	8720.1	10474	8834.99	10119.4	11380.2	10302.5	10999.6	9343.45	8207.67	10960.7	14780.6	8723.57	9814.89	9787.55	9518.03	10397.8	8693.36
RRAD	100	100	100	100	100	100	100	100	100	100	100	100	100	100	100	100	100	100	100	100	100	100	100	100	100	100	100	100	100	100	100	100	100	100	100	100	100	100	100	100	100	100	100	100	100	100	100	100	100
RUNX1	100	100	100	100	100	100	100	100	100	100	100	100	100	100	100	100	100	100	100	100	100	100	100	100	100	100	100	100	100	100	100	100	100	100	100	100	100	100	100	100	119.85	100	439.44	100	163.2	100	100	100	100
RUNX3	100	100	100	100	100	100	100	100	100	100	100	100	100	100	100	100	100	100	100	100	100	100	100	100	100	100	100	100	100	100	100	100	100	100	100	100	100	100	100	100	100	100	100	100	100	100	100	100	100
S100A12	100	100	100	100	100	100	100	100	100	100	100	100	100	100	100	100	100	100	100	100	100	100	100	100	100	100	100	100	100	100	100	100	100	100	100	100	100	100	100	100	100	100	100	100	100	100	100	100	100
S100A7	100	100	100	100	100	100	100	100	100	100	100	100	100	100	100	100	100	100	100	100	100	100	100	100	100	100	100	100	100	100	100	100	100	100	100	100	100	100	100	100	100	100	100	100	100	100	100	100	100
S100A8	100	100	100	100	100	100	100	100	100	100	100	100	100	100	100	100	100	100	100	100	100	100	100	100	100	100	100	100	100	100	100	100	100	100	100	100	100	100	100	100	100	100	100	100	100	100	100	100	100
S100B	100	100	100	100	100	100	100	100	100	100	100	100	100	100	100	100	100	100	100	100	100	100	100	100	100	100	100	100	100	100	100	100	100	100	100	100	100	100	100	100	100	100	100	100	100	100	100	100	100
SAA1	100	100	100	100	100	100	100	100	100	100	100	100	100	100	100	100	100	100	100	100	100	100	111.61	100	100	100	100	100	100	100	100	100	100	100	100	100	100	100	100	100	100	100	100	100	539.7	100	100	100	100
SBNO2	100	196.11	228.47	100	202.1	100	238.52	364.03	300.01	210.88	238.44	120.69	321.36	100	200.71	217.46	162.64	193.01	162.56	100	100	100	244.56	280.37	100	184.31	150.01	100	100	100	227.66	236.77	328.6	100	231.58	100	282.9	100	100	214.86	265.56	288.03	581.72	100	213.3	100	100	100	546.91
SELE	100	100	100	100	100	100	100	100	100	100	100	100	100	100	100	100	100	100	100	100	100	100	100	100	100	100	100	100	100	100	100	100	100	100	100	100	100	100	100	100	100	100	100	100	100	100	100	100	100
SELL	100	100	100	100	100	100	100	100	100	100	100	100	100	100	100	100	100	100	100	100	100	100	100	100	100	100	100	100	100	100	100	100	100	100	100	100	100	100	100	100	100	100	100	100	100	100	100	100	100
SELPLG	100	100	100	100	100	100	100	100	100	100	100	100	100	100	100	100	100	100	100	100	100	100	100	100	100	100	100	100	100	100	100	100	100	100	100	100	100	100	100	100	100	100	100	100	100	100	100	100	100
SEMG1	100	100	100	100	100	100	100	100	100	100	100	100	100	100	100	100	100	100	100	100	100	100	100	100	100	100	100	100	100	100	100	100	100	100	100	100	100	100	100	100	100	100	100	100	100	100	100	100	100
SERPINB2	100	100	100	100	100	100	100	100	100	100	100	100	100	100	100	100	100	100	100	100	100	100	100	100	100	100	100	100	100	100	100	100	100	100	100	100	100	100	100	100	100	100	100	100	100	100	100	100	100
SERPINE1	100	2053.44	374.51	100	100	100	100	796.45	100	100	100	100	276.86	100	100	100	100	100	100	100	100	100	100	1532.71	100	100	100	100	450.16	100	100	1138.47	100	100	783.72	100	488.55	100	100	255.79	374.84	100	232.33	100	452.38	100	100	100	100
SERPING1	1609.04	3158.84	2645.13	1710.6	1728.11	1743.01	2274.56	4393.62	2786.36	2974.78	2844.73	1975.85	3788.52	3241.44	1670.38	2946.43	1739.4	1461.7	1530.96	2230.82	2705.77	1772.83	3185.89	3288.42	2823.72	1575.56	1314.27	1410.44	3397.63	3516.04	2980.31	3823.04	2474.53	3098.37	3208.37	2606.57	3412.6	3789.59	2906.12	2627.46	3702.56	2485.35	4385.38	3900.69	6414.9	3316.16	2212.02	2975.54	3920.6
SH2B2	100	100	100	100	100	100	100	100	100	100	100	100	100	100	100	100	100	100	100	100	100	100	100	100	100	100	100	100	100	100	100	100	100	100	100	100	100	100	100	100	100	100	100	100	100	100	100	100	100
SH2D1A	100	100	100	100	100	100	100	100	100	100	100	100	100	100	100	100	100	100	100	100	100	100	100	100	100	100	100	100	100	100	100	100	100	100	100	100	100	100	100	100	100	100	100	100	100	100	100	100	100
SH2D1B	100	100	100	100	100	100	100	100	100	100	100	100	100	100	100	100	100	100	100	100	100	100	100	100	100	100	100	100	100	100	100	100	100	100	100	100	100	100	100	100	100	100	100	100	100	100	100	100	100
SIGIRR	416.64	272.59	489.08	389.78	524.04	408.71	427.63	269.33	259.83	315.7	297.46	322.54	420.31	100	366.29	375.27	424.4	390.18	389.26	100	378.94	388.67	295.11	400.65	100	462.05	499.19	486.7	276.05	372.17	297.7	287.48	381.44	100	278.26	237.93	356.81	100	332.78	409.26	330.19	458.78	250.34	397.88	264.84	100	591.37	424.13	381.57
SIGLEC1	100	109.07	284.63	150.93	109.87	100	240.3	764.83	156.58	209.05	269.63	100	379.59	203.38	100	186.69	100	100	100	100	100	100	179.36	382.65	100	181.75	100	100	279.76	175.68	446.55	119.25	218.13	126.98	100	100	233.65	757.92	523.31	558.64	856.61	343.22	383.61	587.52	668.55	707.4	100	500.34	1589.86
SLAMF1	100	100	100	100	100	100	100	100	100	100	100	100	100	100	100	100	100	100	100	100	100	100	100	100	100	100	100	100	100	100	100	100	100	100	100	100	100	100	100	100	100	100	100	100	100	100	100	100	100
SLAMF6	100	100	100	100	100	100	100	100	100	100	100	100	100	100	100	100	100	100	100	100	100	100	100	100	100	100	100	100	100	100	100	100	100	100	100	100	100	100	100	100	100	100	100	100	100	100	100	100	100
SLAMF7	100	100	100	100	100	100	100	273.71	100	100	100	100	100	100	100	100	100	100	100	100	100	100	100	100	100	100	100	100	100	100	100	100	100	100	100	100	100	100	100	100	100	100	100	100	163.2	100	100	100	100
SLC11A1	100	100	100	100	100	100	100	100	100	100	100	100	100	100	100	100	100	100	100	100	100	100	100	100	100	100	100	100	100	100	100	100	100	100	100	100	100	100	100	100	100	100	100	100	100	100	100	100	100
SMAD2	395.21	569.87	328.79	325.12	324.52	471.58	387.78	401.31	456.06	470.5	314.05	558.58	382.79	491.94	297.69	470.54	601.62	315.44	327.48	100	266.37	100	410.3	396.73	647.14	401.89	344.06	351.81	371.54	364.7	531.93	385.22	460.41	423.82	507.16	403.21	507.57	100	411.53	413.35	417.14	451.88	430.43	423.91	730.1	456.63	100	391	343.41
SMAD3	812.25	1456.93	637.63	896.95	772.21	908.64	731.2	804.77	955.99	836.53	656.2	488.09	668.22	573.52	758.31	572.46	541.74	693.44	786.51	739.23	600.82	916.45	569.44	557.43	379.85	537.56	748.53	523.26	628.38	533.1	679.68	491.09	528.88	677.83	603.32	577.42	538.7	590.73	693.51	685.51	501.74	669.2	624.94	587.52	380.8	524	456.63	603.06	696.36
SMPD3	100	100	100	100	100	100	100	100	100	100	100	100	100	100	100	100	100	100	100	100	100	100	100	100	100	100	100	100	100	100	100	100	100	100	100	100	100	100	100	100	100	100	100	100	100	100	100	100	100
SOCS1	100	100	100	100	100	100	100	100	100	100	100	100	208.92	100	100	100	100	100	100	100	100	100	100	100	100	100	100	100	100	100	100	100	100	100	100	100	100	100	100	100	100	100	100	100	100	100	100	100	100
SPA17	100	153.85	169.15	100	100	161.14	136.66	137.09	148.53	140.04	127.77	220.01	202.1	100	174.37	141.74	182.63	151.22	126.73	100	100	100	203.07	174.33	271.32	185.59	131.58	186.06	100	100	201.39	231.29	287.81	100	100	184.37	228.55	100	100	204.63	253.81	205.24	271.95	100	306.36	100	100	100	100
SPACA3	100	100	100	100	100	100	100	100	100	100	100	100	100	100	100	100	100	100	100	100	100	100	100	100	100	100	100	100	100	100	100	100	100	100	100	100	100	100	100	100	100	100	100	100	100	100	100	100	100
SPANXB1	100	100	100	100	100	100	100	100	100	100	100	100	100	100	100	100	100	100	100	100	100	100	100	100	100	100	100	100	100	100	100	100	100	100	100	100	100	100	100	100	100	100	100	100	100	100	100	100	100
SPINK5	100	100	100	100	100	100	100	100	100	100	100	100	100	100	100	100	100	100	100	100	100	100	100	100	100	100	100	100	100	100	100	100	100	100	100	100	100	100	100	100	100	100	100	100	100	100	100	100	100
SPN	100	100	100	100	100	100	100	100	100	100	100	100	100	100	100	100	100	100	100	100	100	100	100	100	100	100	100	100	100	100	100	100	100	100	100	100	100	100	100	100	100	100	100	100	100	100	100	100	100
SPO11	100	100	100	100	100	100	100	100	100	100	100	100	100	100	100	100	100	100	100	100	100	100	100	100	100	100	100	100	100	100	100	100	100	100	100	100	100	100	100	100	100	100	100	100	100	100	100	100	100
SPP1	15960.8	9519.11	13625.9	4923.35	5929.93	9546.7	8790.25	32649.7	21976.2	11308.9	5970.04	7063.94	29408.6	22212	11085.9	23398.7	11567.3	11331.9	8750.69	15138.7	17879.9	16197	14763.8	38579.5	5916.75	13536.3	4321.69	14219.9	6453.51	8338.75	9392.96	36122.5	27142.5	4075.37	9200.47	11707.9	38281.4	5520.91	8390.67	10252	16671.5	14693.1	24104.3	10311.4	18832.4	16071.8	7564.27	12074.5	39244.1
SSX1	100	100	100	100	100	100	100	100	100	100	100	100	100	100	100	100	100	100	100	100	100	100	100	100	100	100	100	100	100	100	100	100	100	100	100	100	100	100	100	100	100	100	100	100	100	100	100	100	100
SSX4	100	100	100	100	100	100	100	100	100	100	100	100	100	100	100	100	100	100	100	100	100	100	100	100	100	100	100	100	100	100	100	100	100	100	100	100	100	100	100	100	100	100	100	100	100	100	100	100	100
ST6GAL1	652.81	1670.38	583.31	682.15	885.48	634.13	546.36	777.35	505.34	713.85	1001.92	726.26	603.38	743.66	419.27	628.99	459.13	412.67	1024.2	920.76	864.49	621.15	863.21	1033.9	1465.12	453.09	484.34	927.74	1014.2	900.98	924.85	872.44	1176.01	595.22	643.34	761.89	883.24	516.42	622.38	748.95	552.27	451.88	841.06	1201.07	856.08	572.66	647.51	619.63	883.96
STAT1	297.56	2592.58	2068.03	1019.2	696	363.34	2360.37	3031.3	731.56	1540.19	928.61	546.83	1762.73	1760.85	296.66	1610.59	254.58	332.7	308.55	472.45	576.42	335.56	1193.54	2298.1	671.26	1442.45	249.34	368.14	1011.61	1795.08	3430.15	775.36	1202.2	1142.91	557.79	448.54	1344.21	2983.37	1630.88	3411.2	3191.42	2292.18	2155.77	4860.06	3442.94	2863.28	2799.64	3224.06	6019.21
STAT2	719.63	1295.4	1791.76	1238.49	1267.05	935.48	1314.67	2443.11	1066.42	1475.67	1313.82	570.33	1612.36	888.52	784.09	1366.38	566.45	796.15	885.49	923.57	924.82	741.79	1158.36	1692.73	930.52	803.78	719.34	600.4	1111.9	1104.26	1319.96	936.39	1055.99	909.02	959.02	907.66	1113.36	1545.56	1232.05	1614.54	1618.03	1190.07	1475	1766.28	1417.26	1179	872.08	1328.72	2613.73
STAT3	1972.08	3313.97	2028.35	1771.17	1806.95	2152.75	1696.19	2333.96	2803.88	1978.72	2169.2	1513.4	2423.65	2574.32	1824.85	1960.72	1740.23	1813.76	1648.23	2158.88	2226.65	1705.22	1993.48	2529.58	1891.19	2073.45	1348.58	1559.49	1579.15	1558.71	2427.59	2350.37	2364.35	1900.33	2090.77	1965.63	2491.27	2281.18	1973.83	2101.56	2251.38	2090.39	3522.71	2651.28	2042.86	1938.79	1388.59	2408.93	3961.93
STAT4	100	100	100	100	100	100	100	100	100	100	100	100	100	100	100	100	100	100	100	100	100	100	100	100	100	100	100	100	100	100	100	100	100	100	100	100	100	100	100	100	100	100	100	100	100	100	100	100	100
STAT5B	475.03	453.22	488.79	479.21	525.22	575.36	378.61	469.51	467.29	534.72	554.88	287.3	499.1	100	441.46	532.53	576.16	457.92	483.11	100	100	100	494.15	383.61	207.01	239.34	440.82	487.41	533.93	100	257.21	431.94	408.73	100	452.93	386.97	527.99	100	264.19	292.62	266.73	272.51	248.53	100	327.83	100	100	100	317.97
STAT6	567.63	540.45	1213.64	774.64	932.27	613.03	759.72	1078.72	850.52	1028.87	1055.9	849.08	1164.46	768.42	938.5	858.71	400.2	850.53	932.79	1220.53	1026.47	936.91	1023.97	1018.61	797.88	1029.04	850.92	711.84	1048.44	921.01	1187.53	811.3	881.83	834.48	801.37	808.36	1101.01	1162.88	1000.89	1158.21	1234.97	1046.92	1746.95	1271.72	1025.01	973.14	976.88	1355.23	1221.01
SYCP1	100	100	100	100	100	100	100	100	100	100	100	100	100	100	100	100	100	100	100	100	100	100	100	100	100	100	100	100	100	100	100	100	100	100	100	100	100	100	100	100	100	100	100	100	100	100	100	100	100
SYK	215.27	312.9	208.16	215.81	257.65	217.05	329.79	344.83	331.91	237.05	346.41	316.14	209.34	100	203.3	179.09	213.19	289.85	211.07	100	340.36	100	171.51	269.79	476.31	229.1	192.51	100	317.5	320.67	361.18	246.1	276.75	413.36	266.13	288.87	278.88	100	322.62	253.74	225.61	219.04	221.52	446.22	346.44	100	100	100	407
SYT17	100	100	100	100	100	100	100	100	100	100	100	100	100	100	100	100	100	100	100	100	100	100	100	100	100	100	100	100	100	100	100	100	100	100	100	100	100	100	100	100	100	100	100	100	100	100	100	100	100
TAB1	365.23	270.72	341.38	441.29	439.87	427.23	316.3	344.12	421.65	424.28	399.7	316.14	355.77	397.62	331.88	336.46	317.13	388.38	400.62	100	394.57	422.18	326.16	316.5	267.3	300.78	355.83	345.71	352.41	343.84	353.52	263.5	321.16	267	333.89	332.87	292.88	100	365.81	274.21	326.66	331.15	322.37	100	316.38	100	100	374.43	340.23
TAGAP	100	100	100	100	100	100	100	293.68	100	100	100	100	100	100	100	100	100	100	100	100	100	100	100	100	100	100	100	100	100	100	100	100	100	100	100	100	100	100	100	100	100	100	100	100	100	100	100	100	100
TAL1	100	100	100	100	100	100	100	100	100	100	100	100	100	100	100	100	100	100	100	100	100	100	100	100	100	100	100	100	100	100	100	100	100	100	100	100	100	100	100	100	100	100	100	100	100	100	100	100	100
TANK	563.12	738.96	673.49	570.85	496.24	545.31	553.86	804.29	869.41	657.2	541.65	371.67	700.24	623.32	482.4	734.1	628.31	468.81	457.29	100	484.71	433.6	642.64	635.75	518.52	345.57	443.89	400.34	767.41	525.73	525.36	668.87	617.39	531.44	643.4	531.26	806.38	442.12	452.18	474.74	521.72	410.49	650.15	390.44	602.69	538.97	100	503.66	591.43
TAP1	100	413.68	354.59	100	100	100	100	762.56	100	227.81	245.96	100	308.66	100	100	319.78	100	100	100	100	100	100	224.62	364.4	100	100	100	100	100	100	174.02	100	100	100	100	100	100	100	100	100	162.16	100	100	100	177.52	100	100	100	100
TAP2	100	355.2	405.66	307.2	248.74	100	235.98	738.29	165.13	292.69	363.49	134.57	485.36	100	137.08	356.24	100	118.98	120.56	100	251.62	100	229.58	425.75	221.07	364.77	100	100	233.96	421.88	413.72	197.79	277.16	100	152.16	164.1	211.48	572.15	449.64	566.83	553.45	336.32	642.95	1156.45	592.67	561.43	516.51	801.87	928.48
TAPBP	436.85	709.12	979.78	803.64	721.4	505.71	791.02	1334.41	867.18	878.28	1190.82	667.52	953.34	491.12	631.6	794.35	449.5	486.47	529.15	917.41	901.94	649.43	770.34	1057.79	805.92	1016.24	408.05	487.28	783.74	917.99	1224.74	813.89	830.44	753.97	548.64	748.83	1080.45	1006.84	945	929.02	1453.53	1002.07	1669.51	1383.28	1362.86	1654.34	1193.96	1368.48	1548.52
TARP	100	100	100	100	100	100	100	100	100	100	100	100	100	100	100	100	100	100	100	100	100	100	100	100	100	100	100	100	100	100	100	100	100	100	100	100	100	100	100	100	122.2	100	100	100	100	100	100	100	100
TBK1	183.09	228.24	241.61	100	100	100	197.6	243.29	222.88	221	214.56	116.42	196.96	100	143.27	222.13	193.58	100	167.55	100	100	100	206.51	100	100	148.47	140.28	100	100	100	179.5	100	100	100	100	100	244.2	100	100	100	159.81	100	189.1	100	178.95	100	100	100	100
TBX21	100	100	100	100	100	100	100	100	100	100	100	100	100	100	100	100	100	100	100	100	100	100	100	100	100	100	100	100	100	100	100	100	100	100	100	100	100	100	100	100	100	100	100	100	100	100	100	100	100
TCF7	100	100	100	100	100	100	100	100	100	100	229.15	100	100	100	100	100	100	100	100	100	100	100	100	100	100	100	100	100	100	100	100	100	100	100	100	100	100	100	100	100	100	100	100	100	100	100	100	100	100
TFE3	100	100	100	100	100	100	100	100	100	100	100	100	100	100	100	100	100	100	100	100	100	100	100	100	100	100	100	100	100	100	100	100	100	100	100	100	100	100	100	100	100	100	100	100	100	100	100	100	100
TFEB	314.01	100	263.79	225.91	277.26	316.93	186.05	214.91	100	195.94	291.6	133.5	219.82	100	173.01	153.87	190.68	256.2	213.58	100	100	100	183.94	228.8	100	208.62	261.63	100	100	100	177.31	100	100	100	100	100	100	100	100	237.37	143.36	198.35	100	100	100	100	100	100	100
TFRC	411.5	430.18	223.69	249.72	374.47	385.99	256.01	265.34	222.77	351.71	278.32	664.31	279.8	100	252.43	376.22	619.94	546.03	276.34	100	254.71	281.76	242.13	313.55	409.99	281.58	579.06	496.11	320.84	303	307.55	334.74	263.49	290.01	240.99	292.18	325.88	100	284.52	284.44	205.63	239.74	266.54	100	219.03	100	100	100	359.31
TGFB1	269.14	424.2	283	321.93	309.17	276.1	327.07	607.32	480.93	402.72	433.8	191.18	396.84	454.95	309.39	277.13	204.82	224.48	244.63	571.89	587.08	409.92	402.71	544.01	403.96	309.74	123.9	100	490.6	368.99	453.12	556.86	399.91	627.42	363.33	375.84	462	668.75	421.69	372.43	615.72	410.49	796.03	502	445.22	538.97	100	493.71	690
TGFB2	100	100	100	100	100	100	100	100	100	100	100	100	100	100	100	100	100	100	100	100	100	100	100	100	100	100	100	100	100	100	100	100	100	100	100	100	100	100	100	100	100	100	100	100	100	100	100	100	100
TGFBR2	1839.86	1698.39	2004.46	2160.27	1859.57	2112.67	1696.17	2826.82	2588.26	2408.4	1858.71	1727	1890.12	2161.68	1283.19	2266.12	1559.06	1290.62	1505.63	2689.87	2454.1	2339.9	1964.97	2093.31	1611.83	1543.57	1540.57	1803.8	2327.65	2170.96	1787.31	2004.58	2052.7	1965.4	1814.91	1960.87	2533.42	2106.57	2664.79	1643.19	1976.42	1945.51	2063.92	1844.37	1919.74	2241.97	2679.87	1732.97	2124.05
THBD	213.98	206.4	178.61	198.69	230.92	221.13	100	364.93	206.36	179.93	215.98	130.3	182.4	100	120.74	209	140.17	195.59	118.76	100	100	312.06	211.78	191.94	100	184.31	112.64	100	464.27	100	248.45	100	100	100	159.79	100	179.5	100	345.48	247.6	259.68	286.31	554.7	100	160.34	100	100	100	677.28
THBS1	847.42	1507.04	1102.08	1074.45	909.6	973.82	1220.25	1779.81	1669.61	1255.62	851.63	1331.83	1949.8	1020.34	1048.32	1262.59	825.41	1163.56	1125.71	2254.32	1969.3	2348.55	1694.87	1263.74	1278.21	1192.87	1098.21	778.54	1226.15	811.32	1514.78	1699.02	1502.17	1335.43	1739.98	1494.92	2477.63	1181.46	1651.21	1168.44	1162.12	2043.82	2937.39	1156.45	1228.29	1354.91	1534.56	1600.43	1653.45
THY1	3662.27	884.12	3814.05	2124.31	2370.53	2892.05	1474.55	1203.44	2186.62	2097.49	1152.69	2619.87	1673.12	2408.61	1885.27	1681.28	3334.9	1957.01	2319.79	1753.81	1866.77	4372.42	1986.21	1828.31	480.33	1931.38	1650.14	2242.2	699.61	1843.75	888.73	1097.94	1457.97	1845.84	1376.97	1299.38	4451.38	1593.86	2321.85	1293.27	1186.79	1831.67	1521.83	576.37	297.77	1736.68	4940.54	2667.39	591.43
TICAM1	100	100	191.38	100	100	100	155.49	232.46	100	136.05	100	100	160.54	100	110.11	130.66	100	100	126.1	100	100	100	100	175.8	100	127.99	125.95	100	100	100	165.27	100	100	100	100	100	100	100	100	100	229.13	100	198.11	100	100	100	100	100	100
TICAM2	100	100	100	100	100	100	100	100	100	100	100	100	100	100	100	100	100	100	100	100	100	100	100	100	100	100	100	100	100	100	100	100	100	100	100	100	100	100	100	100	100	100	100	100	100	100	100	100	100
TIGIT	100	100	100	100	100	100	100	100	100	100	100	100	100	100	100	100	100	100	100	100	100	100	100	100	100	100	100	100	100	100	100	100	100	100	100	100	100	100	100	100	100	100	100	100	100	100	100	100	100
TIRAP	100	100	100	100	100	100	100	100	100	100	100	100	100	100	100	100	100	100	100	100	100	100	100	100	100	100	100	100	100	100	100	100	100	100	100	100	100	100	100	100	100	100	100	100	100	100	100	100	100
TLR1	100	100	152.41	100	100	175.32	137.9	492.68	227.25	164.25	235.24	137.78	226.49	100	100	169.83	100	100	111.79	100	100	100	171.86	175.34	227.1	136.95	100	100	184.11	100	223.28	100	240.88	100	100	100	244.76	100	342.94	223.05	239.71	100	293.56	100	264.84	100	100	100	508.76
TLR10	100	100	100	100	100	100	100	100	100	100	100	100	100	100	100	100	100	100	100	100	100	100	100	100	100	100	100	100	100	100	100	100	100	100	100	100	100	100	100	100	100	100	100	100	100	100	100	100	100
TLR2	100	232.5	170.42	100	100	100	100	324.19	100	100	100	100	222.31	100	100	100	100	100	100	100	100	100	100	304.3	100	100	100	100	235.07	100	149.95	229.96	100	100	100	100	100	100	100	100	240.88	100	250.34	100	264.84	100	100	100	352.95
TLR3	100	166.49	122.42	100	100	100	188.65	187.26	100	115.34	100	154.86	130.49	100	100	146.53	120	100	115.13	100	100	100	122.06	156.92	239.16	161.27	114.69	100	100	100	215.62	100	100	208.61	154.9	100	134.24	100	100	100	175.08	189.72	100	397.88	229.05	100	100	100	100
TLR4	270.82	396.71	421.35	351.12	351.83	100	335.8	704.61	398.88	358.63	388.38	100	421.09	100	219.22	316.05	100	207.46	276.6	100	100	100	355.14	394.54	207.01	186.87	135.68	100	505.62	100	298.8	100	358.11	100	352.01	100	326.1	378.96	393.75	255.79	343.11	262.16	304.37	100	243.37	100	100	100	438.8
TLR5	100	100	100	100	100	100	100	100	100	100	100	100	100	100	100	100	100	100	100	100	100	100	100	100	100	100	100	100	100	100	119.3	100	100	100	100	100	100	100	100	100	100	100	100	100	100	100	100	100	100
TLR6	100	100	100	100	100	100	100	100	100	100	100	100	100	100	100	100	100	100	100	100	100	100	100	100	100	100	100	100	100	100	100	100	100	100	100	100	100	100	100	100	100	100	100	100	100	100	100	100	100
TLR7	100	100	100	100	100	100	100	100	100	100	100	100	100	100	100	100	100	100	100	100	100	100	100	100	100	100	100	100	100	100	100	100	100	100	100	100	100	100	100	100	100	100	100	100	100	100	100	100	100
TLR8	100	100	100	100	100	100	100	100	100	100	100	100	100	100	100	100	100	100	100	100	100	100	100	100	100	100	100	100	100	100	100	100	100	100	100	100	100	100	100	100	100	100	100	100	100	100	100	100	100
TLR9	100	100	100	100	100	100	100	100	100	100	100	100	100	100	100	100	100	100	100	100	100	100	100	100	100	100	100	100	100	100	100	100	100	100	100	100	100	100	100	100	100	100	100	100	100	100	100	100	100
TMEFF2	100	100	100	100	100	100	100	100	100	100	100	100	100	100	100	100	100	100	100	100	100	100	100	100	100	100	100	100	100	100	100	100	100	100	100	100	100	100	100	100	100	100	100	100	100	100	100	100	100
TNF	100	100	100	100	100	100	100	100	100	100	100	100	100	100	100	100	100	100	100	100	100	100	100	100	100	100	100	100	100	100	100	100	100	100	100	100	100	100	100	100	100	100	100	100	100	100	100	100	100
TNFAIP3	100	267.95	170.61	100	100	100	100	359.11	100	157.21	307.08	100	215.26	100	100	218.11	100	100	100	100	100	100	100	289.02	100	100	100	100	289.65	100	159.8	286.99	100	100	100	100	100	100	100	239.42	266.73	186.27	351.19	100	267.7	100	100	100	100
TNFRSF10B	100	156.69	100	100	100	100	100	133.15	173.68	100	100	100	117.09	100	100	100	100	100	100	100	100	100	100	100	100	100	100	100	100	100	137.91	100	100	100	100	100	100	100	100	100	168.03	100	192.7	100	100	100	100	100	100
TNFRSF10C	100	100	100	100	100	100	100	100	100	100	100	100	100	100	100	100	100	100	100	100	100	100	100	100	100	100	100	100	100	100	100	100	100	100	100	100	100	100	100	100	100	100	100	100	100	100	100	100	100
TNFRSF11A	100	100	100	100	100	100	100	100	100	100	100	100	100	100	100	100	100	100	100	100	100	100	100	100	100	100	100	100	100	100	100	100	100	100	100	100	100	100	100	100	100	100	100	100	100	100	100	100	100
TNFRSF11B	178.47	237.26	186.02	100	100	168.68	100	202.38	623.74	188.57	172.39	197.59	326.95	100	197.24	181.65	153.8	155.14	100	100	100	100	300.51	100	241.17	168.95	156.67	100	100	100	205.77	268.83	198.9	100	257.83	220.86	299.67	100	100	261.93	244.41	229.39	385.41	100	329.26	100	100	100	100
TNFRSF12A	100	100	100	100	100	100	100	100	106.76	100	100	100	122.39	100	100	100	100	100	100	100	100	100	100	100	100	100	100	100	100	100	100	107.38	100	100	100	100	115.2	100	100	100	100	100	100	100	100	100	100	100	100
TNFRSF13B	100	100	100	100	100	100	100	100	100	100	100	100	100	100	100	100	100	100	100	100	100	100	100	100	100	100	100	100	100	100	100	100	100	100	100	100	100	100	100	100	100	100	100	100	100	100	100	100	100
TNFRSF13C	100	100	100	100	100	100	100	100	100	100	100	100	100	100	100	100	100	100	100	100	100	100	100	100	100	100	100	100	100	100	100	100	100	100	100	100	100	100	100	100	100	100	100	100	100	100	100	100	100
TNFRSF14	868.76	346.98	1100.77	776.73	1024.55	864.79	895.84	972.13	917.82	847.13	731.23	526.54	1006.68	727.13	679.25	1175.86	693.64	724.3	526.39	990.1	681.05	778.92	1010.19	941.6	504.45	1068.72	608.75	691.19	1061.93	434.1	599.78	780.63	981.85	555.42	731.79	607.08	954.11	564.72	680.81	738.72	829.58	1029.67	682.57	561.49	731.54	1257.6	924.48	821.75	667.74
TNFRSF17	100	100	100	100	100	100	100	172.93	100	100	183.22	100	100	100	100	100	100	100	100	100	100	100	100	100	100	100	100	100	100	100	100	100	100	100	100	100	100	100	100	100	100	100	100	100	267.7	100	100	100	100
TNFRSF18	100	100	100	100	100	100	100	100	100	100	100	100	100	100	100	100	100	100	100	100	100	100	100	100	100	100	100	100	100	100	100	100	100	100	100	100	100	100	100	100	100	100	100	100	100	100	100	100	100
TNFRSF1A	657.76	672.9	924.58	594.16	639.99	570.25	601.09	1161.31	1016.05	696.59	696.24	433.62	953.93	831.08	638.9	930.7	637.12	518.43	519.58	781.47	768.25	687.1	814.08	953.89	426.07	590.04	563.19	564.25	800.91	617.71	710.33	840.95	1000.39	538.65	697.1	597.64	1071.42	746.77	683.35	630.26	884.81	646.78	1384.95	710.23	765.89	894.54	587.63	798.56	1201.93
TNFRSF1B	100	100	115.07	100	100	100	100	297.51	100	131.49	243.81	100	135.12	100	100	109.38	100	100	100	100	100	100	100	166.62	100	100	100	100	195.36	100	141.19	202.47	100	100	100	100	197.68	100	259.11	100	192.71	100	196.31	100	196.13	100	100	100	100
TNFRSF4	100	100	100	100	100	100	100	100	100	100	100	100	100	100	100	100	100	100	100	100	100	100	100	100	100	100	100	100	100	100	100	100	100	100	100	100	100	100	100	100	100	100	100	100	100	100	100	100	100
TNFRSF8	100	100	100	100	100	100	100	100	100	100	100	100	100	100	100	100	100	100	100	100	100	100	100	100	100	100	100	100	100	100	100	100	100	100	100	100	100	100	100	100	100	100	100	100	100	100	100	100	100
TNFRSF9	100	100	100	100	100	100	100	100	100	100	100	100	100	100	100	100	100	100	100	100	100	100	100	100	100	100	100	100	100	100	100	100	100	100	100	100	100	100	100	100	100	100	100	100	100	100	100	100	100
TNFSF10	658	689.82	1627.45	1271.36	975.05	978.44	1629.57	2288.03	2118.9	1194.2	738.72	2076.25	2483.94	2116.82	1310.85	1394.7	622.54	919.29	1043.65	1831.04	1558.1	1106.29	1655.66	1829.8	2098.2	2815.79	2212.3	1885.87	943.74	968.53	2241.53	1673.45	3187.91	1159.19	1350.45	1283.24	3411.95	1292.92	1592.78	2400.32	2142.1	2461.2	5748.72	2320.33	3379.95	2634.96	2601.27	2621	4623.31
TNFSF11	100	100	100	100	100	100	100	100	100	100	100	100	100	100	100	100	100	100	100	100	100	100	100	100	100	100	100	100	100	100	100	100	100	100	100	100	100	100	100	100	100	100	100	100	100	100	100	100	100
TNFSF12	440.45	335.21	496.94	493.89	440.03	445.82	435.31	385.77	481.4	530.75	528.1	427.21	437.43	528.24	458.33	405.54	378.22	457.38	459.79	498.96	550.43	481.78	386.74	450.66	399.94	517.08	337.4	352.03	364.35	414.69	443.27	370.68	363.89	557.07	436.67	397.68	398.44	594.45	482.66	388.8	494.69	450.16	495.27	535.46	445.22	415.46	464.11	516.91	378.39
TNFSF13	296.71	198.74	309.78	307.11	294.61	274.55	338.45	243.45	257.18	249.64	237.92	191.18	304.74	100	287.56	184.88	161.51	287.72	265.45	100	344.42	100	257.94	425.5	100	391.65	307.7	100	320.33	100	279.1	274.82	332.71	264.05	242.64	100	221.26	100	411.53	456.33	397.16	363.92	425.03	620.99	193.26	595.11	505.28	424.13	540.55
TNFSF13B	100	100	100	100	100	100	100	463.12	100	100	100	100	100	100	100	100	100	100	100	100	100	100	100	100	100	100	100	100	100	100	100	100	100	100	100	100	100	100	100	100	152.76	100	100	100	156.04	100	100	100	100
TNFSF14	100	100	100	100	100	100	100	100	100	100	100	100	100	100	100	100	100	100	100	100	100	100	100	100	100	100	100	100	100	100	100	100	100	100	100	100	100	100	100	100	100	100	180.1	100	100	100	100	100	100
TNFSF15	100	200.03	203.06	481.7	300.69	100	325.51	292.58	491.82	252.55	100	147.39	234.8	100	384.19	280.26	100	343.46	263.59	100	100	100	284.39	100	100	343.01	124.41	100	100	100	118.21	283.68	346.67	293.86	100	100	460.39	100	100	100	218.56	100	199.91	100	100	598.86	100	331.35	100
TNFSF18	100	100	100	100	100	100	100	100	100	100	100	100	100	100	100	100	100	100	100	100	100	100	100	100	100	100	100	100	100	100	100	100	100	100	100	100	100	100	100	100	100	100	100	100	100	100	100	100	100
TNFSF4	100	100	100	100	100	100	100	100	100	100	100	100	100	100	100	100	100	100	100	100	100	100	100	100	100	100	100	100	100	100	100	100	100	100	100	100	100	100	100	100	100	100	100	100	100	100	100	100	100
TNFSF8	100	100	100	100	100	100	100	100	100	100	100	100	100	100	100	100	100	100	100	100	100	100	100	100	100	100	100	100	100	100	100	100	100	100	100	100	100	100	100	100	100	100	100	100	100	100	100	100	100
TOLLIP	633.83	401.19	651.93	669.73	627.65	671.69	637.74	503.69	651.93	598.8	476.29	1156.67	650.21	1044.76	580.57	830.81	893.83	646.48	648.65	747.27	582.39	659.43	543.31	629	619.01	1093.04	707.06	812.66	506.89	623.52	681.87	649.5	726.05	547.32	573.5	495.12	742.32	821.08	843.39	763.27	642.75	869.27	531.29	814.35	721.51	1186.48	1141.57	781.99	747.23
TP53	100	401.19	255.08	251.87	283.8	257.76	258	320.82	332.2	347.49	321.47	202.93	365.55	100	237.09	304.92	234.31	217.21	231.9	100	100	100	338.51	341.56	225.09	226.54	250.36	100	275.15	100	221.09	391.89	361.95	279.97	308.48	342.12	394.84	100	259.11	212.82	244.41	248.36	315.17	100	317.81	100	100	100	359.31
TPSAB1	100	100	100	100	100	100	100	100	100	107.31	232.92	100	251.93	100	100	122.78	100	128.99	100	289.22	382.21	100	612.44	100	703.42	100	100	100	239.05	100	100	380.61	100	100	151.94	103.49	100	100	100	100	277.31	100	1098.6	100	788.8	1006.83	100	100	100
TPTE	100	100	100	100	100	100	100	100	100	100	100	100	100	100	100	100	100	100	100	100	100	100	100	100	100	100	100	100	100	100	100	100	100	100	100	100	100	100	100	100	100	100	100	100	100	100	100	100	100
TRAF2	100	100	162.94	100	100	100	100	199.37	222.07	191.06	222.16	114.28	240.05	100	152.41	203.27	138.81	100	187.43	100	100	100	100	220.19	100	177.91	140.28	100	100	100	191.54	100	100	100	100	100	100	100	100	100	254.98	222.49	289.96	100	184.67	100	100	100	330.69
TRAF3	100	100	100	100	100	100	100	104.12	122.69	100	100	100	100	100	100	100	100	100	100	100	100	100	100	102.76	100	190.71	100	100	100	100	202.48	100	100	100	100	100	100	100	294.68	247.6	283.19	229.39	416.03	100	209.01	100	100	100	410.18
TRAF6	215.74	176.19	189.38	100	201.22	229.21	100	198.97	213.52	191.63	100	134.57	190.82	100	150.27	166.6	188.22	175.06	157.65	100	100	100	215.39	100	219.06	166.39	161.28	100	225.51	100	202.48	100	100	100	100	100	100	100	289.6	245.56	292.59	246.64	208.91	100	100	100	100	100	333.87
TREM1	100	100	100	100	100	100	100	100	100	100	100	100	100	100	100	100	100	100	100	100	100	100	100	100	100	100	100	100	100	100	100	100	100	100	100	100	100	100	100	100	100	100	100	100	100	100	100	100	100
TREM2	100	100	100	100	100	100	100	100	100	100	100	100	100	100	100	100	100	100	100	100	100	100	100	100	100	100	100	100	100	100	100	100	100	100	100	100	100	100	100	100	100	100	100	100	100	100	100	100	100
TTK	100	100	100	100	100	100	100	100	100	100	100	100	100	100	100	100	100	100	100	100	100	100	100	100	100	100	100	100	100	100	100	100	100	100	100	100	100	100	100	100	100	100	100	100	100	100	100	100	100
TXK	100	100	100	100	100	100	100	100	100	100	100	100	100	100	100	100	100	100	100	100	100	100	100	100	100	100	100	100	100	100	100	100	100	100	100	100	100	100	100	100	100	100	100	100	100	100	100	100	100
TXNIP	4978.94	13467.6	7264.41	6682.96	4645.47	5712.5	5900.59	6631.21	6678.5	6923.79	8090.01	3916.46	4773.41	3445.54	3492.58	4501.27	4121.48	5161.33	5738.05	8350.64	5142.81	5180.8	4712.75	5514.55	2904.11	3116.57	4979.08	3814.62	7396.25	7120.94	5597.25	5401.28	4104.23	4843.81	4947.51	5609.38	4513.57	6720.95	6658.17	4982.77	5769.46	4060.04	4961.69	7198.99	9369.67	5891.24	3615.58	4347.34	6038.29
TYK2	222.76	137.03	264.46	238.39	327.63	100	269.33	339.39	198.9	228.01	309.07	316.14	250.82	346.6	238.89	273.24	167.88	225.03	225.19	100	264.52	100	271.47	211.87	263.28	271.34	233.98	242.56	234.49	100	348.05	260.75	222.19	260.42	262.62	245.58	276.17	419.83	426.77	317.18	313.74	350.12	311.57	100	312.08	385.51	100	100	410.18
UBC	9939.35	13415.6	16087.9	12522.3	10249.3	10664.6	13394	18154.6	13052.2	16162.1	12087.1	10186.9	13730.9	14099.8	15441.9	15211.6	12063	12442.7	9902.23	14962.2	13633	12997.7	13575.5	15338.5	8039.06	8859.5	9572.13	11256	12960	17120	10174.4	15171.9	16948.4	13964.9	16142.1	11811.7	17335.9	9670.88	9058.77	8827.78	10689.4	8371.89	10364.6	10582.8	12484.8	11453.1	12987.6	11372	9434.23
ULBP2	100	100	100	100	100	100	100	100	100	100	100	100	100	100	100	100	100	100	100	100	100	100	100	100	100	100	100	100	100	100	100	100	100	100	100	100	100	100	100	100	100	100	100	100	100	100	100	100	100
USP9Y	100	100	100	100	100	100	100	100	100	100	100	100	100	100	100	100	100	100	100	100	100	100	100	100	100	100	100	100	100	100	100	100	100	100	100	100	100	100	100	100	100	100	100	100	100	100	100	100	100
VCAM1	676.25	308.3	778.89	637.86	410.73	743.69	627.9	2234.33	3324.53	753.44	840.91	453.91	1701.12	1609.91	899.69	1482.04	779.61	453.91	451.25	1188.24	840.63	491.51	2081.2	1438.92	592.88	776.9	265.72	551.65	1004.32	398.36	1152.5	2109.19	2048.93	601.47	815.58	778.17	2716.39	731.91	909.43	532.04	1507.58	912.39	3079.67	535.46	1815.24	1429.77	501.54	977.49	1828.34
VEGFA	2156.1	937.97	1780.82	1998.07	1323.49	1893.04	1408.99	1335.8	1866.41	1527.18	660.89	971.91	991.04	719.3	1292.84	2210.95	2252.02	1177.25	1069.23	1587.03	822.06	1682.31	838.86	1155.49	604.94	975.29	1275.36	1668.71	1344.45	1557.91	955.49	597.15	1388.99	857.08	941.51	989.51	1686.43	798.79	1168.55	714.16	719.13	967.58	484.46	461.09	260.55	449.14	1377.36	907.91	607.33
VEGFC	100	100	100	100	140.6	100	100	100	100	100	100	124.96	100	100	100	100	100	100	100	100	100	100	133.05	100	100	100	106.49	100	100	100	100	100	100	100	100	100	100	100	100	100	126.9	100	194.51	100	100	100	100	100	100
XCL2	100	100	100	100	100	100	100	100	100	100	100	100	100	100	100	100	100	100	100	100	100	100	100	100	100	100	100	100	100	100	100	100	100	100	100	100	100	100	100	100	100	100	100	100	100	100	100	100	100
XCR1	100	100	100	100	100	100	100	100	100	100	100	100	100	100	100	100	100	100	100	100	100	100	100	100	100	100	100	100	100	100	100	100	100	100	100	100	100	100	100	100	100	100	100	100	100	100	100	100	100
YTHDF2	313.76	289.44	258.11	211.76	240.84	285.32	340.04	261.49	350.47	332.85	259.33	220.01	280.05	100	216.49	333.13	377.71	202.49	221.21	100	100	100	295.19	321.69	229.11	238.06	264.19	100	301.27	100	250.64	239.16	378.41	100	315.13	238.57	354.72	100	100	241.46	257.33	258.71	262.94	100	240.5	100	100	100	100
ZAP70	100	100	100	100	100	100	100	100	100	100	100	100	100	100	100	100	100	100	100	100	100	100	100	100	100	100	100	100	100	100	100	100	100	100	100	100	100	100	100	100	100	100	100	100	100	100	100	100	100
ZNF205	100	100	100	100	100	100	100	100	100	100	100	100	100	100	100	100	100	100	100	100	100	100	100	100	100	100	100	100	100	100	100	100	100	100	100	100	100	100	100	100	100	100	100	100	100	100	100	100	100
[truncated: 29 more columns]

## Sheet: S3_Data_Figure_1A
Gene ID	Log2 fold change	std error (log2)	Lower confidence limit (log2)	Upper confidence limit (log2)	Linear fold change	Lower confidence limit (linear)	Upper confidence limit (linear)	P-value	BH.p.value	method	Gene.sets	probe.ID
MX1	3.3	0.304	2.7	3.89	9.82	6.5	14.8	2.16e-16	7.17e-14	lm.nb		NM_002462.2:1485
ISG15	3.71	0.347	3.03	4.39	13.1	8.16	20.9	4.04e-16	7.17e-14	lm.nb		NM_005101.3:305
STAT1	2.5	0.25	2.01	2.99	5.67	4.03	7.97	6.49e-15	6.73e-13	lm.nb	Chemokines, Regulation	NM_007315.2:205
OAS3	2.81	0.283	2.26	3.37	7.03	4.78	10.3	8.34e-15	6.73e-13	lm.nb	Cytokines, Pathogen Defense	NM_006187.2:4980
PSMB9	1.62	0.163	1.3	1.94	3.06	2.45	3.83	1.03e-14	6.73e-13	lm.nb	Antigen Processing	NM_002800.4:455
IFI27	2.64	0.268	2.12	3.17	6.24	4.34	8.98	1.14e-14	6.73e-13	lm.nb	Chemokines	NM_005532.3:390
IFITM1	1.99	0.205	1.59	2.39	3.97	3.01	5.25	2.18e-14	1.1e-12	lm.nb	Regulation	NM_003641.3:482
Mx2	2.45	0.268	1.92	2.97	5.46	3.79	7.85	2.22e-13	9.85e-12	lm.nb		NM_002463.1:2188
DDX58	2.17	0.258	1.66	2.67	4.49	3.17	6.38	4.32e-12	1.7e-10	lm.nb		NM_014314.3:2130
APOL1	0.982	0.118	0.751	1.21	1.98	1.68	2.32	6.43e-12	2.28e-10	lm.nb		NM_003661.3:820
IFIT1	2.33	0.286	1.77	2.9	5.04	3.42	7.44	1.26e-11	4.08e-10	lm.nb	Chemokines	NM_001548.3:1440
C1QB	2.62	0.326	1.98	3.26	6.15	3.95	9.57	2.11e-11	6.24e-10	lm.nb	Complement	NM_000491.3:819
CYBB	1.84	0.23	1.39	2.29	3.57	2.61	4.89	2.63e-11	6.97e-10	lm.nb		NM_000397.3:2686
PSMB8	1.18	0.148	0.887	1.47	2.26	1.85	2.76	2.75e-11	6.97e-10	lm.nb	Chemokines	NM_004159.4:1215
HLA-A	1.43	0.18	1.08	1.78	2.7	2.11	3.44	3.01e-11	7.12e-10	lm.nb	Antigen Processing, Cytotoxicity, Regulation	NM_002116.5:1000
TAP2	1.73	0.22	1.3	2.16	3.32	2.46	4.48	3.94e-11	8.73e-10	lm.nb	Antigen Processing	NM_000544.3:909
BST2	1.62	0.207	1.21	2.03	3.08	2.32	4.08	5.18e-11	1.08e-09	lm.nb		NM_004335.2:560
C1QA	2.21	0.29	1.65	2.78	4.64	3.13	6.88	1.06e-10	2.08e-09	lm.nb	Complement	NM_015991.2:718
CD163	2.49	0.328	1.85	3.14	5.64	3.61	8.81	1.29e-10	2.42e-09	lm.nb	Transporter Functions	NM_004244.4:1630
IFI16	1.52	0.202	1.13	1.92	2.88	2.19	3.79	1.64e-10	2.91e-09	lm.nb	Chemokines	NM_005531.1:2255
IRF7	2.24	0.298	1.65	2.82	4.71	3.14	7.06	1.96e-10	3.32e-09	lm.nb		NM_001572.3:1763
IFI35	1.72	0.234	1.26	2.18	3.29	2.39	4.52	3.93e-10	6.33e-09	lm.nb	Chemokines	NM_005533.3:415
HLA-B	1.18	0.162	0.863	1.5	2.27	1.82	2.82	4.44e-10	6.85e-09	lm.nb	Antigen Processing, Cytotoxicity, Regulation	NM_005514.6:937
SIGLEC1	2.24	0.315	1.63	2.86	4.74	3.09	7.27	8.76e-10	1.3e-08	lm.nb	Transporter Functions	NM_023068.3:5165
IFIH1	1.83	0.257	1.32	2.33	3.55	2.5	5.03	1.02e-09	1.45e-08	lm.nb		NM_022168.2:185
CD53	1.72	0.247	1.24	2.2	3.29	2.36	4.61	1.77e-09	2.42e-08	lm.nb		NM_001040033.1:835
HLA-E	0.724	0.11	0.509	0.939	1.65	1.42	1.92	7.5e-09	9.86e-08	lm.nb	Regulation	NM_005516.4:1204
STAT2	0.867	0.133	0.605	1.13	1.82	1.52	2.19	1.19e-08	1.5e-07	lm.nb	Chemokines, Regulation	NM_005419.2:1965
IFITM2	0.634	0.0987	0.44	0.827	1.55	1.36	1.77	1.64e-08	2.01e-07	lm.nb		NM_006435.2:390
LCP1	1.76	0.287	1.19	2.32	3.38	2.29	4.99	5.34e-08	6.32e-07	lm.nb	Leukocyte Functions, Macrophage Functions, T-Cell Functions	NM_002298.4:3195
TAPBP	0.807	0.14	0.532	1.08	1.75	1.45	2.12	2.37e-07	2.71e-06	lm.nb	Antigen Processing	NM_003190.4:1536
MYD88	1.05	0.187	0.687	1.42	2.08	1.61	2.68	3.83e-07	4.23e-06	lm.nb	TLR	NM_002468.3:2145
CD14	1.4	0.249	0.914	1.89	2.64	1.88	3.71	3.93e-07	4.23e-06	lm.nb		NM_000591.2:885
C1R	0.946	0.169	0.615	1.28	1.93	1.53	2.42	4.33e-07	4.52e-06	lm.nb	Complement	NM_001733.4:760
CD74	1.09	0.197	0.708	1.48	2.14	1.63	2.79	5.08e-07	5.08e-06	lm.nb		NM_001025159.1:964
ICAM1	1.49	0.269	0.966	2.02	2.82	1.95	4.06	5.27e-07	5.08e-06	lm.nb	Adhesion, Regulation	NM_000201.2:2253
CTSS	1.51	0.273	0.98	2.05	2.86	1.97	4.14	5.3e-07	5.08e-06	lm.nb		NM_004079.3:685
C1S	1.14	0.209	0.725	1.55	2.2	1.65	2.92	8.72e-07	8.15e-06	lm.nb	Complement	NM_001734.2:775
FCGR3A	1.64	0.306	1.04	2.24	3.11	2.05	4.71	1.11e-06	1.01e-05	lm.nb	Regulation	NM_000569.6:1644
FCGR2A	1.19	0.231	0.742	1.65	2.29	1.67	3.13	2.21e-06	1.95e-05	lm.nb	Transporter Functions	NM_021642.3:60
CEBPB	1.17	0.227	0.729	1.62	2.26	1.66	3.07	2.26e-06	1.95e-05	lm.nb		NM_005194.2:1420
HLA-DMB	0.95	0.185	0.587	1.31	1.93	1.5	2.49	2.66e-06	2.21e-05	lm.nb	Antigen Processing	NM_002118.3:20
IFNAR2	0.973	0.19	0.602	1.35	1.96	1.52	2.54	2.68e-06	2.21e-05	lm.nb	Chemokines	NM_000874.3:631
SERPING1	0.73	0.143	0.45	1.01	1.66	1.37	2.01	2.84e-06	2.29e-05	lm.nb		NM_000062.2:305
CCL2	1.37	0.272	0.839	1.91	2.59	1.79	3.75	3.68e-06	2.9e-05	lm.nb	Chemokines	NM_002982.3:123
FCER1G	1.41	0.285	0.851	1.97	2.65	1.8	3.91	5.32e-06	4.1e-05	lm.nb	Regulation	NM_004106.1:36
PTPRC	1.17	0.247	0.69	1.66	2.26	1.61	3.15	1.09e-05	8.23e-05	lm.nb	B-Cell Functions, T-Cell Functions	NM_080921.3:258
F13A1	1.06	0.226	0.615	1.5	2.08	1.53	2.83	1.46e-05	0.000108	lm.nb	Cell Functions	NM_000129.3:3196
MSR1	1.19	0.261	0.68	1.7	2.28	1.6	3.25	2.19e-05	0.000159	lm.nb	Cell Functions	NM_002445.3:326
CMKLR1	0.951	0.211	0.538	1.36	1.93	1.45	2.57	2.66e-05	0.000189	lm.nb	Chemokines	NM_004072.1:770
CCL5	1.05	0.235	0.593	1.51	2.07	1.51	2.85	2.9e-05	0.0002	lm.nb	Chemokines, Cytokines	NM_002985.2:280
IFIT2	1.33	0.297	0.75	1.91	2.52	1.68	3.77	2.92e-05	0.0002	lm.nb	Chemokines	NM_001547.4:1995
SERPINE1	1.75	0.392	0.978	2.51	3.35	1.97	5.71	3.25e-05	0.000218	lm.nb		NM_000602.4:577
CFB	1.22	0.274	0.683	1.76	2.33	1.61	3.38	3.32e-05	0.000218	lm.nb		NM_001710.5:2029
MCL1	0.459	0.104	0.255	0.663	1.37	1.19	1.58	3.77e-05	0.000244	lm.nb		NM_021960.3:1260
TLR4	0.953	0.216	0.529	1.38	1.94	1.44	2.6	3.94e-05	0.00025	lm.nb	Microglial Functions, TLR	NM_138554.2:2570
HLA-DRB3	0.969	0.221	0.535	1.4	1.96	1.45	2.64	4.25e-05	0.000265	lm.nb	Antigen Processing	NM_022555.3:698
CCL21	1.48	0.339	0.818	2.15	2.79	1.76	4.43	4.35e-05	0.000266	lm.nb	Chemokines, Regulation	NM_002989.2:180
PSMB10	0.888	0.205	0.486	1.29	1.85	1.4	2.45	5.11e-05	0.000307	lm.nb		NM_002801.2:221
IFNGR1	0.646	0.15	0.353	0.94	1.57	1.28	1.92	5.42e-05	0.000313	lm.nb	Cell Functions	NM_000416.1:1140
STAT3	0.369	0.0856	0.201	0.537	1.29	1.15	1.45	5.45e-05	0.000313	lm.nb	Chemokines, Regulation	NM_139276.2:4535
ITGB2	1.1	0.255	0.599	1.6	2.14	1.51	3.02	5.47e-05	0.000313	lm.nb	Adhesion, Regulation	NM_000211.2:520
CD68	1.11	0.259	0.6	1.62	2.16	1.52	3.07	6.21e-05	0.00035	lm.nb	Cell Functions	NM_001251.2:1140
TAP1	0.971	0.229	0.523	1.42	1.96	1.44	2.67	6.86e-05	0.000381	lm.nb	Antigen Processing	NM_000593.5:2075
CD47	0.399	0.0944	0.214	0.584	1.32	1.16	1.5	7.38e-05	0.000403	lm.nb	Macrophage Functions, Regulation, T-Cell Functions, Transporter Functions	NM_001777.3:897
CASP8	0.759	0.181	0.405	1.11	1.69	1.32	2.16	7.92e-05	0.000426	lm.nb		NM_001228.4:301
CD97	0.663	0.159	0.351	0.975	1.58	1.28	1.97	9.11e-05	0.000479	lm.nb		NM_078481.2:1370
NFKBIA	0.423	0.102	0.224	0.621	1.34	1.17	1.54	9.18e-05	0.000479	lm.nb		NM_020529.1:945
HLA-DRA	0.727	0.175	0.384	1.07	1.66	1.31	2.1	9.4e-05	0.000484	lm.nb	Antigen Processing	NM_019111.3:335
TNFAIP3	0.882	0.213	0.466	1.3	1.84	1.38	2.46	9.6e-05	0.000487	lm.nb	TNF Superfamily	NM_006290.2:260
BAX	0.574	0.139	0.302	0.846	1.49	1.23	1.8	9.96e-05	0.000498	lm.nb	Cell Cycle, Regulation	NM_138761.3:342
NFATC2	0.743	0.18	0.391	1.09	1.67	1.31	2.14	0.000101	0.000499	lm.nb	Regulation	NM_012340.3:1815
ITGAL	0.911	0.221	0.477	1.34	1.88	1.39	2.54	0.000109	0.000529	lm.nb	Adhesion, Regulation	NM_002209.2:3905
HLA-DMA	0.788	0.192	0.411	1.16	1.73	1.33	2.24	0.000114	0.000546	lm.nb	Antigen Processing, Regulation	NM_006120.3:380
TGFB1	0.751	0.184	0.39	1.11	1.68	1.31	2.16	0.000124	0.000585	lm.nb	Interleukins, Regulation	NM_000660.3:1260
IL2RG	0.623	0.155	0.319	0.926	1.54	1.25	1.9	0.000149	0.000695	lm.nb	Chemokines	NM_000206.1:595
HLA-C	0.791	0.199	0.4	1.18	1.73	1.32	2.27	0.00018	0.000829	lm.nb	Antigen Processing, Cytotoxicity, Regulation	NM_002117.4:895
CD84	0.951	0.242	0.477	1.42	1.93	1.39	2.68	0.000202	0.000917	lm.nb		NM_001184879.1:28
JAK2	0.42	0.107	0.21	0.629	1.34	1.16	1.55	0.000206	0.000917	lm.nb	Cytokines, Regulation	NM_004972.2:455
CD40	0.71	0.181	0.355	1.06	1.64	1.28	2.09	0.000207	0.000917	lm.nb	Regulation	NM_001250.4:1265
JAK1	0.315	0.0805	0.157	0.473	1.24	1.12	1.39	0.000216	0.000946	lm.nb	Cytokines, Regulation	NM_002227.1:285
CD164	-0.465	0.119	-0.699	-0.231	0.724	0.616	0.852	0.000225	0.000975	lm.nb		NM_006016.4:2575
DUSP6	0.632	0.162	0.314	0.95	1.55	1.24	1.93	0.000231	0.000989	lm.nb		NM_001946.2:1535
TLR1	0.75	0.193	0.371	1.13	1.68	1.29	2.19	0.000239	0.00101	lm.nb	Microglial Functions, TLR	NM_003263.3:545
FOS	0.864	0.223	0.428	1.3	1.82	1.34	2.46	0.000243	0.00101	lm.nb		NM_005252.2:1475
AXL	0.826	0.213	0.408	1.24	1.77	1.33	2.37	0.000244	0.00101	lm.nb		NM_021913.2:2190
CCND3	0.699	0.185	0.336	1.06	1.62	1.26	2.09	0.000346	0.00141	lm.nb	Cell Cycle	NM_001760.2:1215
NLRC5	0.705	0.187	0.338	1.07	1.63	1.26	2.1	0.000352	0.00142	lm.nb		NM_032206.4:860
CXCR4	1.05	0.28	0.5	1.6	2.07	1.41	3.03	0.000376	0.0015	lm.nb	Cell Cycle, Cell Functions, Chemokines, Regulation	NM_003467.2:1335
PIK3CG	0.386	0.104	0.183	0.589	1.31	1.13	1.5	0.000407	0.00161	lm.nb		NM_002649.2:2125
CD276	0.656	0.179	0.306	1.01	1.58	1.24	2.01	0.000478	0.00187	lm.nb	Regulation	NM_001024736.1:2120
IL16	0.809	0.223	0.373	1.25	1.75	1.3	2.37	0.000541	0.00209	lm.nb	Interleukins	NM_004513.4:1262
CD99	0.477	0.132	0.218	0.735	1.39	1.16	1.66	0.000575	0.00215	lm.nb		NM_002414.3:625
BCL6	0.832	0.23	0.381	1.28	1.78	1.3	2.43	0.000576	0.00215	lm.nb	Regulation	NM_001706.2:675
FLT3LG	0.685	0.189	0.314	1.06	1.61	1.24	2.08	0.000576	0.00215	lm.nb	Cytokines	NM_001459.3:360
SBNO2	0.774	0.215	0.352	1.2	1.71	1.28	2.29	0.00062	0.00229	lm.nb	Macrophage Functions	NM_014963.2:2002
ANXA1	0.594	0.166	0.269	0.92	1.51	1.2	1.89	0.000652	0.00238	lm.nb	Transporter Functions	NM_000700.1:515
CD4	0.844	0.238	0.378	1.31	1.8	1.3	2.48	0.000715	0.00259	lm.nb		NM_000616.4:975
NFKB2	0.783	0.224	0.343	1.22	1.72	1.27	2.33	0.000853	0.00306	lm.nb		NM_002502.2:825
RPS6	-0.274	0.0787	-0.428	-0.119	0.827	0.743	0.921	0.000899	0.00316	lm.nb	Cell Functions	NM_001010.2:171
HLA-DPA1	0.615	0.177	0.268	0.962	1.53	1.2	1.95	0.0009	0.00316	lm.nb	Antigen Processing	NM_033554.2:857
TFRC	-0.614	0.178	-0.963	-0.265	0.653	0.513	0.832	0.000965	0.00336	lm.nb		NM_003234.1:1220
C3AR1	0.747	0.217	0.322	1.17	1.68	1.25	2.25	0.000995	0.00342	lm.nb	Regulation	NM_004054.2:415
KLF4	0.789	0.229	0.34	1.24	1.73	1.27	2.36	0.001	0.00342	lm.nb		NM_004235.4:1980
TLR2	0.691	0.202	0.294	1.09	1.61	1.23	2.12	0.00109	0.00368	lm.nb	TLR	NM_003264.3:180
MAP3K1	0.399	0.117	0.17	0.629	1.32	1.12	1.55	0.00112	0.00374	lm.nb		NM_005921.1:2525
HCK	0.752	0.222	0.317	1.19	1.68	1.25	2.28	0.00117	0.00388	lm.nb	Leukocyte Functions	NM_002110.2:260
TNFSF13	0.696	0.206	0.292	1.1	1.62	1.22	2.14	0.00121	0.00398	lm.nb	Regulation, TNF Superfamily	NM_003808.3:810
C3	1.27	0.377	0.529	2.01	2.41	1.44	4.02	0.00128	0.00417	lm.nb	Regulation	NM_000064.2:4396
IL10RA	0.832	0.249	0.344	1.32	1.78	1.27	2.5	0.00137	0.00444	lm.nb	Cytokines	NM_001558.2:150
IL1R1	0.647	0.196	0.263	1.03	1.57	1.2	2.04	0.00153	0.0049	lm.nb		NM_000877.2:4295
CDKN1A	0.632	0.192	0.255	1.01	1.55	1.19	2.01	0.00162	0.00514	lm.nb	Cell Cycle, Regulation, Senescence	NM_000389.2:1975
MME	-0.854	0.264	-1.37	-0.337	0.553	0.387	0.792	0.00187	0.00587	lm.nb	Cell Functions	NM_000902.2:5059
MAP3K7	0.233	0.0721	0.0914	0.374	1.18	1.07	1.3	0.00193	0.00602	lm.nb		NM_145333.1:670
CASP1	0.498	0.155	0.194	0.802	1.41	1.14	1.74	0.00204	0.0063	lm.nb		NM_001223.3:971
RORC	-0.461	0.145	-0.745	-0.177	0.727	0.597	0.885	0.00223	0.0068	lm.nb	Cell Functions	NM_001001523.1:1350
ITGB3	0.892	0.281	0.342	1.44	1.86	1.27	2.72	0.00224	0.0068	lm.nb	Adhesion	NM_000212.2:4485
INPP5D	0.518	0.164	0.196	0.84	1.43	1.15	1.79	0.00241	0.00724	lm.nb	Regulation	NM_005541.3:4075
ICAM2	0.494	0.157	0.186	0.803	1.41	1.14	1.74	0.00252	0.00752	lm.nb	Adhesion, Regulation	NM_000873.3:415
ATG7	0.484	0.157	0.176	0.793	1.4	1.13	1.73	0.003	0.00886	lm.nb	Transporter Functions	NM_001136031.2:810
CSF2RB	0.75	0.244	0.272	1.23	1.68	1.21	2.34	0.00303	0.00886	lm.nb	Chemokines	NM_000395.2:3300
IRF1	0.667	0.217	0.242	1.09	1.59	1.18	2.13	0.00305	0.00886	lm.nb	Chemokines, NK Cell Functions, Regulation, T-Cell Functions	NM_002198.1:510
TNFRSF1B	0.533	0.175	0.191	0.876	1.45	1.14	1.84	0.00326	0.00935	lm.nb	Chemokines, TNF Superfamily	NM_001066.2:835
ITGAE	-0.174	0.0569	-0.285	-0.0621	0.887	0.821	0.958	0.00327	0.00935	loglinear	Adhesion	NM_002208.4:3405
THY1	-0.688	0.227	-1.13	-0.243	0.621	0.456	0.845	0.00345	0.00973	lm.nb		NM_006288.2:135
IRF2	0.412	0.136	0.146	0.678	1.33	1.11	1.6	0.00345	0.00973	lm.nb	Chemokines, Regulation	NM_002199.3:1624
HLA-DPB1	0.572	0.191	0.199	0.946	1.49	1.15	1.93	0.00376	0.0105	lm.nb	Antigen Processing	NM_002121.4:931
IFI30	0.537	0.181	0.182	0.893	1.45	1.13	1.86	0.00422	0.0117	lm.nb		NM_006332.3:385
IL13RA1	0.218	0.074	0.0729	0.363	1.16	1.05	1.29	0.00445	0.0122	lm.nb	Cytokines, T-Cell Functions	NM_001560.2:1230
C1QBP	-0.269	0.0919	-0.45	-0.0894	0.83	0.732	0.94	0.0046	0.0126	lm.nb	Chemokines	NM_001212.3:745
STAT6	0.335	0.115	0.111	0.56	1.26	1.08	1.47	0.00471	0.0128	lm.nb	Chemokines, Regulation, T-Cell Functions	NM_003153.3:2030
TNFSF10	0.574	0.197	0.187	0.96	1.49	1.14	1.95	0.00489	0.0131	lm.nb	Cell Cycle, Cytokines, Regulation, TNF Superfamily	NM_003810.2:115
CXCL16	0.506	0.179	0.156	0.857	1.42	1.11	1.81	0.00609	0.0162	lm.nb	Chemokines	NM_001100812.1:850
TRAF3	0.561	0.198	0.173	0.95	1.48	1.13	1.93	0.00613	0.0162	lm.nb		NM_145725.1:1795
HLA-G	0.763	0.27	0.234	1.29	1.7	1.18	2.45	0.00617	0.0162	lm.nb	Regulation	NM_002127.4:1180
ABCB1	-0.359	0.129	-0.613	-0.106	0.78	0.654	0.929	0.00703	0.0182	lm.nb		NM_000927.3:3910
TNFRSF1A	0.275	0.099	0.0813	0.47	1.21	1.06	1.38	0.00704	0.0182	lm.nb	Chemokines, TNF Superfamily	NM_001065.2:515
VCAM1	0.662	0.24	0.191	1.13	1.58	1.14	2.19	0.00757	0.0195	lm.nb	Adhesion, Regulation	NM_001078.3:2535
IL32	0.723	0.263	0.207	1.24	1.65	1.15	2.36	0.00774	0.0198	lm.nb	Chemokines, Interleukins	NM_004221.4:358
NFATC4	0.492	0.18	0.139	0.844	1.41	1.1	1.79	0.00799	0.0202	lm.nb		NM_001136022.2:2296
FN1	0.579	0.212	0.164	0.994	1.49	1.12	1.99	0.00801	0.0202	lm.nb	Senescence	NM_212482.1:1776
DPP4	-0.776	0.284	-1.33	-0.218	0.584	0.397	0.86	0.00813	0.0203	lm.nb	Macrophage Functions, Regulation, T-Cell Functions	NM_001935.3:2700
MERTK	0.55	0.204	0.15	0.949	1.46	1.11	1.93	0.00888	0.022	lm.nb	Transporter Functions	NM_006343.2:665
FYN	0.472	0.177	0.126	0.819	1.39	1.09	1.76	0.0094	0.0232	lm.nb	Transporter Functions	NM_002037.3:765
LRP1	0.354	0.133	0.0936	0.614	1.28	1.07	1.53	0.00963	0.0236	lm.nb		NM_002332.2:4240
IL15RA	0.246	0.0932	0.0633	0.429	1.19	1.04	1.35	0.0103	0.0251	lm.nb	Chemokines	NM_002189.2:505
IL15	0.129	0.0493	0.0329	0.226	1.09	1.02	1.17	0.0107	0.0258	loglinear	Interleukins, Regulation	NM_172174.1:1685
A2M	0.377	0.145	0.093	0.662	1.3	1.07	1.58	0.0114	0.0275	lm.nb	Chemokines	NM_000014.4:1685
PIK3CD	0.483	0.187	0.117	0.849	1.4	1.08	1.8	0.0118	0.0282	lm.nb		NM_005026.3:2978
MFGE8	0.539	0.211	0.125	0.952	1.45	1.09	1.94	0.0129	0.0306	lm.nb	Transporter Functions	NM_001114614.1:328
PDGFRB	0.27	0.106	0.0612	0.478	1.21	1.04	1.39	0.0136	0.0318	lm.nb		NM_002609.3:840
TP53	0.437	0.173	0.099	0.776	1.35	1.07	1.71	0.0136	0.0318	lm.nb	T-Cell Functions	NM_000546.2:1330
ECSIT	-0.527	0.208	-0.936	-0.119	0.694	0.523	0.921	0.0138	0.0319	lm.nb		NM_001142464.2:1318
ITGA5	0.425	0.169	0.0947	0.756	1.34	1.07	1.69	0.0141	0.0324	lm.nb	Adhesion	NM_002205.2:925
TICAM1	0.321	0.128	0.0694	0.573	1.25	1.05	1.49	0.0149	0.034	lm.nb	Macrophage Functions	NM_014261.1:518
PECAM1	0.284	0.115	0.0592	0.51	1.22	1.04	1.42	0.0159	0.0359	lm.nb	Transporter Functions	NM_000442.3:1365
TANK	0.314	0.127	0.065	0.562	1.24	1.05	1.48	0.016	0.0359	lm.nb		NM_004180.2:110
ANP32B	-0.229	0.0927	-0.411	-0.0475	0.853	0.752	0.968	0.016	0.0359	lm.nb	Cell Functions	NM_006401.2:660
CCR1	0.405	0.165	0.082	0.728	1.32	1.06	1.66	0.0166	0.0368	lm.nb	Chemokines, Cytokines, NK Cell Functions, Regulation, T-Cell Functions	NM_001295.2:535
CKLF	0.46	0.187	0.093	0.827	1.38	1.07	1.77	0.0166	0.0368	lm.nb	Chemokines	NM_181640.2:275
COL3A1	0.559	0.229	0.11	1.01	1.47	1.08	2.01	0.0172	0.038	lm.nb	Regulation	NM_000090.3:180
IKBKG	0.35	0.143	0.0688	0.631	1.27	1.05	1.55	0.0174	0.038	lm.nb		NM_003639.2:470
BCL10	0.175	0.0716	0.0341	0.315	1.13	1.02	1.24	0.0175	0.0381	lm.nb		NM_003921.2:1250
C7	0.311	0.129	0.0579	0.563	1.24	1.04	1.48	0.0188	0.0406	lm.nb	Complement	NM_000587.2:310
IKBKB	0.451	0.188	0.0832	0.82	1.37	1.06	1.76	0.019	0.041	lm.nb		NM_001556.1:1995
IL6ST	0.191	0.0805	0.0333	0.349	1.14	1.02	1.27	0.0205	0.0438	lm.nb	Chemokines	NM_002184.2:2505
MRC1	0.572	0.242	0.0975	1.05	1.49	1.07	2.07	0.0211	0.0448	lm.nb		NM_002438.2:525
IFNAR1	0.314	0.133	0.0527	0.575	1.24	1.04	1.49	0.0214	0.0452	lm.nb	Pathogen Defense	NM_000629.2:3123
LTBR	0.237	0.101	0.0396	0.435	1.18	1.03	1.35	0.0216	0.0452	lm.nb	Chemokines	NM_002342.1:1435
CD200	0.126	0.0538	0.021	0.232	1.09	1.01	1.17	0.0217	0.0452	loglinear	Regulation	NM_005944.5:665
TRAF2	0.409	0.176	0.0648	0.753	1.33	1.05	1.69	0.0229	0.0475	lm.nb		NM_021138.3:1325
CXCL14	-0.416	0.181	-0.771	-0.0604	0.75	0.586	0.959	0.025	0.0516	lm.nb	Chemokines	NM_004887.4:1125
ENG	0.353	0.155	0.0491	0.657	1.28	1.03	1.58	0.026	0.0534	lm.nb		NM_001114753.1:1480
CASP3	0.286	0.128	0.0354	0.537	1.22	1.02	1.45	0.0287	0.0585	lm.nb	Cell Cycle, Regulation	NM_032991.2:685
TLR3	0.34	0.152	0.0414	0.638	1.27	1.03	1.56	0.029	0.0588	lm.nb	Microglial Functions, TLR	NM_003265.2:230
MAP3K5	0.259	0.116	0.031	0.486	1.2	1.02	1.4	0.0293	0.0591	lm.nb		NM_005923.3:1760
CYLD	0.354	0.161	0.0376	0.67	1.28	1.03	1.59	0.0318	0.0637	lm.nb		NM_015247.1:2890
NPHS1	-0.722	0.33	-1.37	-0.0758	0.606	0.387	0.949	0.032	0.0639	lm.nb		NM_004646.3:4050
IL1RAP	0.147	0.0673	0.0149	0.279	1.11	1.01	1.21	0.0327	0.0649	loglinear		NM_002182.2:460
TICAM2	0.416	0.192	0.0394	0.792	1.33	1.03	1.73	0.034	0.067	loglinear		NM_021649.4:3234
MAPK14	0.148	0.0689	0.0129	0.283	1.11	1.01	1.22	0.0354	0.0694	lm.nb		NM_001315.1:450
DEFB1	-0.543	0.255	-1.04	-0.0425	0.686	0.485	0.971	0.0372	0.0725	lm.nb		NM_005218.3:40
AMICA1	0.507	0.24	0.0358	0.977	1.42	1.03	1.97	0.0387	0.075	lm.nb	Regulation	NM_153206.2:620
MAPKAPK2	0.209	0.0992	0.0141	0.403	1.16	1.01	1.32	0.0393	0.0757	lm.nb		NM_004759.3:710
FEZ1	0.216	0.104	0.0126	0.419	1.16	1.01	1.34	0.0412	0.0791	lm.nb	Cell Functions	NM_005103.4:426
MEF2C	0.354	0.171	0.0193	0.689	1.28	1.01	1.61	0.042	0.08	lm.nb		NM_002397.3:2445
THBD	0.441	0.213	0.0238	0.858	1.36	1.02	1.81	0.0421	0.08	lm.nb	Leukocyte Functions	NM_000361.2:1246
CYFIP2	-0.424	0.205	-0.826	-0.0219	0.745	0.564	0.985	0.0426	0.0805	lm.nb		NM_001037332.2:4043
CREB1	0.263	0.128	0.0109	0.514	1.2	1.01	1.43	0.0448	0.0842	lm.nb		NM_004379.3:4855
NRP1	0.272	0.135	0.00732	0.537	1.21	1.01	1.45	0.048	0.0897	lm.nb	Cell Functions	NM_003873.5:370
CSF1	0.2	0.1	0.00327	0.397	1.15	1	1.32	0.0504	0.0936	lm.nb		NM_000757.4:823
IL4R	0.339	0.171	0.0052	0.674	1.27	1	1.6	0.0506	0.0936	lm.nb	Cytokines, T-Cell Functions	NM_000418.2:705
TNFRSF14	0.249	0.126	0.0026	0.495	1.19	1	1.41	0.0517	0.0952	lm.nb	B-Cell Functions, Regulation, T-Cell Functions, TNF Superfamily	NM_003820.2:916
VEGFA	-0.362	0.183	-0.721	-0.00337	0.778	0.607	0.998	0.052	0.0952	lm.nb	Cytokines, Leukocyte Functions	NM_001025366.1:1325
EWSR1	0.143	0.0723	0.0011	0.284	1.1	1	1.22	0.0524	0.0953	lm.nb	Cell Functions	NM_013986.3:452
CTSL	-0.289	0.147	-0.576	-0.00102	0.819	0.671	0.999	0.0533	0.0966	lm.nb		NM_001912.4:1072
ITGB1	0.171	0.0872	0.000354	0.342	1.13	1	1.27	0.0537	0.0967	lm.nb	Adhesion, Regulation	NM_033666.2:2000
MMP7	0.767	0.392	-0.000576	1.54	1.7	1	2.9	0.0543	0.0974	lm.nb		NM_002423.3:311
TNFRSF10B	0.21	0.109	-0.00299	0.424	1.16	0.998	1.34	0.0575	0.103	lm.nb	TNF Superfamily	NM_003842.3:565
TGFBR2	0.155	0.0805	-0.00268	0.313	1.11	0.998	1.24	0.0583	0.103	lm.nb		NM_001024847.1:1760
CDH5	0.349	0.181	-0.00687	0.704	1.27	0.995	1.63	0.0588	0.104	lm.nb		NM_001795.3:3405
HAVCR2	0.519	0.275	-0.0202	1.06	1.43	0.986	2.08	0.0636	0.111	lm.nb	Cell Functions	NM_032782.3:955
PLA1A	0.272	0.144	-0.0107	0.555	1.21	0.993	1.47	0.0637	0.111	lm.nb		NM_015900.2:1250
Col1a2	0.331	0.177	-0.0145	0.677	1.26	0.99	1.6	0.0647	0.113	lm.nb		NM_000089.3:2635
EP300	0.0982	0.0532	-0.00604	0.202	1.07	0.996	1.15	0.0692	0.12	lm.nb		NM_001429.2:715
SYK	0.337	0.185	-0.0257	0.7	1.26	0.982	1.62	0.073	0.126	lm.nb	Macrophage Functions	NM_003177.3:1685
CD24	0.26	0.144	-0.0226	0.544	1.2	0.984	1.46	0.0759	0.13	lm.nb		NM_013230.2:95
LAMP2	-0.218	0.121	-0.455	0.0196	0.86	0.729	1.01	0.0766	0.131	lm.nb		NM_001122606.1:46
TNFSF15	0.428	0.24	-0.043	0.899	1.35	0.971	1.86	0.0794	0.135	lm.nb	Chemokines, TNF Superfamily	NM_001204344.1:2338
IL1RL1	0.538	0.303	-0.0559	1.13	1.45	0.962	2.19	0.0804	0.136	lm.nb		NM_016232.4:700
CD81	0.132	0.0751	-0.0149	0.279	1.1	0.99	1.21	0.0827	0.139	lm.nb	Regulation	NM_004356.3:735
EPCAM	-0.146	0.0837	-0.31	0.0177	0.904	0.806	1.01	0.0849	0.142	lm.nb	Adhesion, Cell Functions	NM_002354.1:415
CREB5	0.315	0.181	-0.0404	0.67	1.24	0.972	1.59	0.0869	0.145	lm.nb		NM_182898.2:1885
IRF5	0.238	0.137	-0.0308	0.507	1.18	0.979	1.42	0.0872	0.145	lm.nb	Senescence	NM_002200.3:1845
IL18	0.294	0.17	-0.0395	0.627	1.23	0.973	1.54	0.0886	0.146	lm.nb	Interleukins, NK Cell Functions, T-Cell Functions	NM_001562.2:48
RUNX1	0.296	0.172	-0.0419	0.634	1.23	0.971	1.55	0.0906	0.148	lm.nb	Regulation	NM_001754.4:635
IRAK1	0.359	0.209	-0.0511	0.769	1.28	0.965	1.7	0.0909	0.148	lm.nb		NM_001569.3:1995
PVR	0.237	0.138	-0.034	0.508	1.18	0.977	1.42	0.0911	0.148	lm.nb	Regulation	NM_006505.3:604
TRAF6	0.283	0.169	-0.0472	0.614	1.22	0.968	1.53	0.0976	0.158	lm.nb		NM_145803.1:1839
APP	0.163	0.0969	-0.0273	0.353	1.12	0.981	1.28	0.0978	0.158	lm.nb		NM_000484.3:1725
MAP2K2	0.146	0.0881	-0.0267	0.319	1.11	0.982	1.25	0.102	0.164	lm.nb		NM_030662.2:1325
PLAT	0.246	0.149	-0.0458	0.539	1.19	0.969	1.45	0.103	0.165	lm.nb		NM_000931.2:1334
ITGAM	0.103	0.0623	-0.0193	0.225	1.07	0.987	1.17	0.104	0.165	loglinear	Adhesion, Transporter Functions	NM_000632.3:515
MAP4K2	0.184	0.113	-0.0381	0.407	1.14	0.974	1.33	0.109	0.173	lm.nb		NM_004579.2:1610
IRAK4	0.167	0.103	-0.0348	0.37	1.12	0.976	1.29	0.109	0.173	lm.nb		NM_016123.1:2175
ILF3	0.0777	0.0486	-0.0176	0.173	1.06	0.988	1.13	0.115	0.181	lm.nb	Chemokines	NM_001137673.1:730
TNFRSF12A	0.128	0.0805	-0.03	0.286	1.09	0.979	1.22	0.117	0.183	loglinear	TNF Superfamily	NM_016639.1:575
SOCS1	0.138	0.0867	-0.0323	0.307	1.1	0.978	1.24	0.117	0.183	lm.nb	B-Cell Functions, Cell Functions, T-Cell Functions	NM_003745.1:1025
ST6GAL1	0.194	0.125	-0.0508	0.439	1.14	0.965	1.36	0.125	0.194	lm.nb		NM_003032.2:1300
IL11RA	0.0743	0.0492	-0.0222	0.171	1.05	0.985	1.13	0.136	0.21	loglinear	Chemokines	NM_147162.1:400
NOD1	0.126	0.0847	-0.0396	0.292	1.09	0.973	1.22	0.14	0.215	lm.nb		NM_006092.1:3285
TNFRSF11B	0.317	0.212	-0.0994	0.732	1.25	0.933	1.66	0.141	0.215	lm.nb	TNF Superfamily	NM_002546.2:1075
CD34	0.0885	0.0594	-0.0279	0.205	1.06	0.981	1.15	0.141	0.215	loglinear	Regulation	NM_001025109.1:1580
SIGIRR	-0.239	0.162	-0.556	0.0789	0.847	0.68	1.06	0.145	0.221	lm.nb		NM_021805.2:469
MAP2K1	0.14	0.0973	-0.0503	0.331	1.1	0.966	1.26	0.154	0.232	lm.nb		NM_002755.2:970
TXNIP	0.194	0.135	-0.0708	0.458	1.14	0.952	1.37	0.156	0.234	lm.nb		NM_006472.1:255
IRF3	0.21	0.146	-0.0769	0.496	1.16	0.948	1.41	0.156	0.234	lm.nb		NM_001571.5:1303
ENTPD1	0.0774	0.0548	-0.03	0.185	1.06	0.979	1.14	0.162	0.242	loglinear		NM_001098175.1:8830
TPSAB1	0.497	0.352	-0.193	1.19	1.41	0.875	2.28	0.163	0.242	lm.nb	Cell Functions	NM_003294.3:579
CD59	0.0879	0.0638	-0.0371	0.213	1.06	0.975	1.16	0.173	0.255	lm.nb		NM_000611.4:730
MICA	0.269	0.196	-0.114	0.653	1.21	0.924	1.57	0.173	0.255	lm.nb	Regulation	NM_000247.1:550
IL17RA	0.158	0.118	-0.0724	0.388	1.12	0.951	1.31	0.183	0.269	lm.nb	Cell Functions	NM_014339.6:482
RORA	-0.245	0.183	-0.603	0.113	0.844	0.658	1.08	0.184	0.269	lm.nb	Regulation	NM_134261.2:1715
MAPK8	-0.212	0.162	-0.53	0.106	0.863	0.693	1.08	0.196	0.285	lm.nb		NM_002750.2:945
HMGB1	0.119	0.0914	-0.0599	0.298	1.09	0.959	1.23	0.196	0.285	lm.nb	Regulation	NM_002128.4:208
RIPK2	0.106	0.0816	-0.0542	0.266	1.08	0.963	1.2	0.2	0.288	lm.nb		NM_003821.5:1695
ATF1	-0.158	0.123	-0.399	0.0823	0.896	0.758	1.06	0.202	0.289	lm.nb		NM_005171.2:710
LAMP1	-0.0966	0.075	-0.244	0.0504	0.935	0.845	1.04	0.202	0.289	lm.nb	Transporter Functions	NM_005561.3:2070
ITGB4	0.25	0.203	-0.148	0.647	1.19	0.903	1.57	0.222	0.317	lm.nb	Adhesion	NM_001005731.1:4151
LGALS3	-0.161	0.132	-0.421	0.0982	0.894	0.747	1.07	0.227	0.323	lm.nb		NM_001177388.1:495
KLF2	0.228	0.188	-0.14	0.597	1.17	0.907	1.51	0.229	0.324	lm.nb		NM_016270.2:1015
PSMB7	-0.111	0.0919	-0.291	0.0695	0.926	0.818	1.05	0.233	0.328	lm.nb	Antigen Processing	NM_002799.2:420
IGF2R	-0.147	0.123	-0.388	0.0947	0.903	0.764	1.07	0.238	0.333	lm.nb		NM_000876.1:2605
PSMD7	0.0894	0.0752	-0.0579	0.237	1.06	0.961	1.18	0.238	0.333	lm.nb		NM_002811.3:580
BLNK	0.162	0.137	-0.107	0.431	1.12	0.929	1.35	0.241	0.336	lm.nb		NM_013314.2:930
MAPK1	-0.185	0.157	-0.493	0.123	0.88	0.711	1.09	0.243	0.336	lm.nb		NM_138957.2:430
CCL15	-0.244	0.207	-0.65	0.162	0.844	0.637	1.12	0.244	0.336	lm.nb	Chemokines	NM_032965.3:112
F2RL1	0.148	0.129	-0.105	0.401	1.11	0.93	1.32	0.254	0.35	lm.nb	Macrophage Functions, T-Cell Functions	NM_005242.3:940
NUP107	0.191	0.17	-0.143	0.524	1.14	0.906	1.44	0.266	0.365	lm.nb	Cell Cycle	NM_020401.2:1002
BST1	-0.25	0.224	-0.69	0.189	0.841	0.62	1.14	0.268	0.367	lm.nb		NM_004334.2:710
TNFSF12	0.0759	0.0691	-0.0596	0.211	1.05	0.96	1.16	0.276	0.376	lm.nb	Chemokines, TNF Superfamily	NM_003809.2:339
TBK1	0.177	0.163	-0.143	0.497	1.13	0.906	1.41	0.282	0.381	lm.nb		NM_013254.2:1610
NFATC3	0.172	0.159	-0.139	0.483	1.13	0.908	1.4	0.283	0.382	lm.nb	Regulation	NM_004555.2:2190
CTSB	-0.193	0.183	-0.552	0.166	0.875	0.682	1.12	0.295	0.397	lm.nb		NM_147780.2:1054
MIF	-0.126	0.12	-0.361	0.109	0.916	0.778	1.08	0.297	0.399	lm.nb		NM_002415.1:319
TYK2	0.166	0.163	-0.154	0.487	1.12	0.899	1.4	0.312	0.416	lm.nb	Cytokines, Pathogen Defense, Regulation	NM_003331.3:485
MAF	-0.174	0.172	-0.511	0.162	0.886	0.702	1.12	0.313	0.416	lm.nb	Cell Functions, T-Cell Functions	NM_005360.4:888
REPS1	-0.146	0.144	-0.429	0.137	0.904	0.743	1.1	0.315	0.417	lm.nb	Cell Functions	NM_001128617.2:1288
ATF2	0.119	0.12	-0.116	0.355	1.09	0.923	1.28	0.323	0.426	lm.nb		NM_001256090.1:336
CHUK	0.151	0.152	-0.147	0.448	1.11	0.903	1.36	0.324	0.427	lm.nb		NM_001278.3:860
CD44	0.187	0.191	-0.188	0.562	1.14	0.878	1.48	0.331	0.434	lm.nb	Senescence, Transporter Functions	NM_001001392.1:429
RELA	0.0765	0.0794	-0.0791	0.232	1.05	0.947	1.17	0.339	0.442	lm.nb		NM_021975.2:360
SPP1	0.229	0.239	-0.24	0.697	1.17	0.847	1.62	0.342	0.444	lm.nb	Cytokines	NM_000582.2:760
TOLLIP	-0.124	0.13	-0.379	0.131	0.918	0.769	1.09	0.343	0.444	lm.nb		NM_019009.2:1320
ZNF205	-0.038	0.0398	-0.116	0.0401	0.974	0.923	1.03	0.344	0.444	loglinear	Cell Functions	NM_001031686.1:573
PLA2G6	-0.204	0.216	-0.628	0.22	0.868	0.647	1.16	0.35	0.45	lm.nb	Cell Functions	NM_001004426.1:1954
NOTCH1	-0.261	0.278	-0.806	0.284	0.834	0.572	1.22	0.351	0.45	lm.nb	Regulation	NM_017617.3:735
CTSH	-0.166	0.177	-0.514	0.182	0.891	0.7	1.13	0.352	0.45	lm.nb		NM_004390.3:344
SMAD2	0.146	0.157	-0.162	0.454	1.11	0.894	1.37	0.356	0.453	lm.nb	Cell Functions	NM_005901.5:1678
CX3CR1	0.102	0.111	-0.116	0.319	1.07	0.923	1.25	0.363	0.46	lm.nb	Chemokines, Microglial Functions	NM_001337.3:1040
STAT5B	-0.188	0.219	-0.617	0.242	0.878	0.652	1.18	0.395	0.499	lm.nb	Chemokines, Regulation	NM_012448.3:200
NFATC1	0.0291	0.0342	-0.0379	0.0962	1.02	0.974	1.07	0.398	0.501	loglinear	Regulation	NM_172389.1:1984
MCAM	0.175	0.207	-0.23	0.58	1.13	0.853	1.5	0.4	0.502	lm.nb	Adhesion	NM_006500.2:1515
CD2AP	-0.0695	0.0827	-0.232	0.0927	0.953	0.852	1.07	0.404	0.504	lm.nb		NM_012120.2:973
ABL1	0.141	0.168	-0.188	0.47	1.1	0.878	1.38	0.405	0.504	lm.nb	Cell Cycle, Regulation, Senescence	NM_005157.3:3200
ITCH	-0.0464	0.0571	-0.158	0.0654	0.968	0.896	1.05	0.419	0.52	lm.nb		NM_001257138.1:438
DOCK9	0.145	0.182	-0.212	0.502	1.11	0.863	1.42	0.429	0.531	lm.nb	Cell Functions	NM_001130048.1:1020
MASP1	-0.117	0.151	-0.413	0.18	0.922	0.751	1.13	0.443	0.546	lm.nb		NM_139125.3:35
ETS1	0.0831	0.108	-0.129	0.295	1.06	0.914	1.23	0.445	0.547	lm.nb	Senescence	NM_005238.3:4625
CTSC	-0.0996	0.133	-0.361	0.162	0.933	0.779	1.12	0.458	0.559	lm.nb		NM_001114173.1:260
REL	0.0291	0.039	-0.0474	0.106	1.02	0.968	1.08	0.458	0.559	loglinear	Regulation	NM_002908.2:225
CFI	0.111	0.152	-0.186	0.408	1.08	0.879	1.33	0.468	0.567	lm.nb		NM_000204.3:1780
MAPK3	0.0892	0.122	-0.15	0.329	1.06	0.901	1.26	0.468	0.567	lm.nb		NM_001040056.1:580
CD63	0.0813	0.112	-0.139	0.301	1.06	0.908	1.23	0.471	0.569	lm.nb		NM_001780.4:350
BMI1	-0.121	0.174	-0.462	0.219	0.919	0.726	1.16	0.488	0.585	lm.nb		NM_005180.5:1145
CXCL12	0.0928	0.133	-0.168	0.354	1.07	0.89	1.28	0.488	0.585	lm.nb	Chemokines	NM_000609.5:210
PNMA1	-0.11	0.16	-0.424	0.204	0.926	0.745	1.15	0.493	0.59	lm.nb		NM_006029.4:1565
ITGA1	0.0611	0.093	-0.121	0.243	1.04	0.919	1.18	0.513	0.612	lm.nb	Adhesion, NK Cell Functions, T-Cell Functions	NM_181501.1:1875
IGF1R	0.0605	0.0943	-0.124	0.245	1.04	0.917	1.19	0.523	0.621	lm.nb	Senescence	NM_000875.2:455
CD58	0.118	0.186	-0.247	0.483	1.09	0.843	1.4	0.528	0.625	lm.nb		NM_001779.2:478
PRKCE	0.103	0.166	-0.222	0.428	1.07	0.857	1.35	0.536	0.632	lm.nb	Macrophage Functions	NM_005400.2:1695
BCL2	0.14	0.229	-0.31	0.589	1.1	0.807	1.5	0.545	0.64	lm.nb	Cell Cycle	NM_000657.2:947
ATG16L1	0.0629	0.104	-0.141	0.267	1.04	0.907	1.2	0.547	0.641	lm.nb	Transporter Functions	NM_198890.2:1975
PSEN1	0.092	0.162	-0.226	0.41	1.07	0.855	1.33	0.573	0.669	lm.nb	Cell Functions	NM_000021.2:900
Kat2B	0.0886	0.159	-0.224	0.401	1.06	0.856	1.32	0.58	0.675	lm.nb		NM_003884.3:1220
UBC	0.0481	0.087	-0.122	0.219	1.03	0.919	1.16	0.582	0.675	lm.nb		NM_021009.3:1875
C4B	0.133	0.241	-0.34	0.606	1.1	0.79	1.52	0.584	0.676	lm.nb	Complement	NM_001002029.3:4437
PPARG	0.04	0.0745	-0.106	0.186	1.03	0.929	1.14	0.593	0.684	lm.nb		NM_015869.3:1035
ARG2	0.109	0.211	-0.305	0.523	1.08	0.81	1.44	0.607	0.697	lm.nb		NM_001172.3:1150
PIN1	-0.109	0.213	-0.527	0.309	0.927	0.694	1.24	0.611	0.7	lm.nb		NM_006221.2:434
ICOSLG	0.0854	0.177	-0.261	0.432	1.06	0.834	1.35	0.631	0.72	lm.nb	Cell Functions, Regulation	NM_015259.4:1190
C5	0.0299	0.0638	-0.0952	0.155	1.02	0.936	1.11	0.641	0.73	loglinear	Complement	NM_001735.2:2592
CD46	-0.0413	0.0908	-0.219	0.137	0.972	0.859	1.1	0.651	0.738	lm.nb		NM_172350.1:365
CD83	-0.0962	0.225	-0.537	0.344	0.935	0.689	1.27	0.67	0.757	lm.nb		NM_004233.3:1960
IL6R	0.101	0.239	-0.367	0.569	1.07	0.775	1.48	0.674	0.76	lm.nb	Cytokines	NM_000565.2:993
GPI	-0.0329	0.0825	-0.195	0.129	0.977	0.874	1.09	0.691	0.775	lm.nb		NM_000175.2:1695
MAVS	0.0303	0.0764	-0.119	0.18	1.02	0.921	1.13	0.693	0.775	lm.nb		NM_020746.3:3460
IL17RB	-0.106	0.268	-0.631	0.42	0.929	0.646	1.34	0.694	0.775	lm.nb	Chemokines	NM_018725.3:225
CCL14	-0.0979	0.254	-0.595	0.399	0.934	0.662	1.32	0.701	0.78	lm.nb	Chemokines	NM_032963.3:274
YTHDF2	0.0697	0.184	-0.29	0.43	1.05	0.818	1.35	0.705	0.783	lm.nb		NM_001172828.1:275
TFE3	0.019	0.0508	-0.0805	0.118	1.01	0.946	1.09	0.709	0.784	loglinear		NM_006521.3:2935
SPA17	0.0599	0.163	-0.26	0.38	1.04	0.835	1.3	0.715	0.788	lm.nb	CT Antigen	NM_017425.3:175
CEACAM1	0.0735	0.204	-0.327	0.474	1.05	0.797	1.39	0.72	0.791	lm.nb	Adhesion	NM_001712.3:2455
TAB1	-0.0531	0.151	-0.348	0.242	0.964	0.786	1.18	0.725	0.795	lm.nb		NM_153497.2:614
ICAM3	0.0666	0.196	-0.317	0.45	1.05	0.803	1.37	0.735	0.803	lm.nb	Adhesion, Regulation	NM_002162.3:1225
ATG10	0.0214	0.0636	-0.103	0.146	1.01	0.931	1.11	0.737	0.803	loglinear	Transporter Functions	NM_001131028.1:985
ITGA2	0.0553	0.166	-0.27	0.38	1.04	0.83	1.3	0.74	0.803	lm.nb	Adhesion	NM_002203.2:475
MUC1	0.0496	0.151	-0.247	0.346	1.03	0.843	1.27	0.744	0.805	lm.nb		NM_001018017.1:725
APOE	0.0757	0.235	-0.386	0.537	1.05	0.766	1.45	0.749	0.806	lm.nb	Transporter Functions	NM_000041.2:96
NT5E	0.0694	0.217	-0.355	0.494	1.05	0.782	1.41	0.75	0.806	lm.nb	Transporter Functions	NM_002526.2:1214
JAM3	-0.0533	0.167	-0.381	0.275	0.964	0.768	1.21	0.751	0.806	lm.nb		NM_032801.3:890
VEGFC	0.0273	0.0882	-0.146	0.2	1.02	0.904	1.15	0.758	0.81	lm.nb		NM_005429.2:565
GTF3C1	0.0241	0.0803	-0.133	0.181	1.02	0.912	1.13	0.765	0.816	lm.nb	Cell Functions	NM_001520.3:2904
CX3CL1	0.0503	0.182	-0.306	0.406	1.04	0.809	1.33	0.783	0.832	lm.nb	Chemokines, Leukocyte Functions	NM_002996.3:140
NFKB1	-0.0217	0.0799	-0.178	0.135	0.985	0.884	1.1	0.786	0.833	lm.nb		NM_003998.2:1675
PRKCD	0.0533	0.198	-0.334	0.441	1.04	0.793	1.36	0.789	0.833	lm.nb	Senescence	NM_006254.3:2165
ELK1	0.0113	0.0453	-0.0775	0.1	1.01	0.948	1.07	0.803	0.846	loglinear		NM_005229.3:2350
PLAU	-0.0662	0.278	-0.611	0.479	0.955	0.655	1.39	0.813	0.853	lm.nb	Senescence	NM_002658.2:793
FADD	0.0119	0.0504	-0.0868	0.111	1.01	0.942	1.08	0.814	0.853	loglinear		NM_003824.2:1560
ITGA6	0.0226	0.105	-0.183	0.228	1.02	0.881	1.17	0.83	0.865	lm.nb	Adhesion	NM_000210.1:3065
SMAD3	0.0213	0.0993	-0.173	0.216	1.01	0.887	1.16	0.831	0.865	lm.nb	Regulation	NM_005902.3:4220
ALCAM	0.0395	0.195	-0.343	0.422	1.03	0.789	1.34	0.84	0.872	lm.nb	Adhesion	NM_001627.3:789
TFEB	-0.0337	0.181	-0.388	0.321	0.977	0.764	1.25	0.853	0.883	lm.nb		NM_007162.2:2026
MAP2K4	0.0321	0.186	-0.332	0.397	1.02	0.794	1.32	0.863	0.888	lm.nb		NM_003010.2:2830
NPHS2	-0.0625	0.366	-0.779	0.654	0.958	0.583	1.57	0.865	0.888	lm.nb		NM_014625.2:1180
CR1	0.0324	0.19	-0.341	0.406	1.02	0.79	1.32	0.865	0.888	lm.nb		NM_000651.4:1695
AKT3	0.0117	0.0739	-0.133	0.157	1.01	0.912	1.11	0.874	0.893	lm.nb	Cell Functions	NM_181690.1:755
PDGFC	0.0312	0.197	-0.356	0.418	1.02	0.782	1.34	0.875	0.893	lm.nb	Cell Functions	NM_016205.2:1632
PSEN2	-0.0229	0.182	-0.379	0.334	0.984	0.769	1.26	0.9	0.916	lm.nb	Macrophage Functions	NM_000447.2:915
ATG5	-0.0193	0.171	-0.354	0.316	0.987	0.782	1.24	0.91	0.923	lm.nb		NM_004849.2:1104
CD9	-0.0133	0.126	-0.261	0.235	0.991	0.834	1.18	0.917	0.927	lm.nb		NM_001769.2:405
AMBP	-0.0104	0.122	-0.249	0.228	0.993	0.841	1.17	0.932	0.94	lm.nb	Regulation	NM_001633.3:597
BCL2L1	0.00499	0.0767	-0.145	0.155	1	0.904	1.11	0.948	0.954	lm.nb		NM_001191.2:260
CDH1	0.00635	0.105	-0.198	0.211	1	0.871	1.16	0.952	0.954	lm.nb	Regulation	NM_004360.2:535
THBS1	-0.0058	0.141	-0.282	0.27	0.996	0.823	1.21	0.967	0.967	lm.nb	Antigen Processing, Cell Cycle, Regulation	NM_003246.2:3465
Analysis: LN (n=55) v TBM (n=14); Advanced analysis: categorical reference TBM; Threshold count: 100, observational frequency: 0.08; Differential Expression: Fast (negative binomial model); p value adjustment: Benjamini-Hochberg

## Sheet: S4_STRING_network_clusters
Analysis LN v TBM. Input 171. 36 Clusters	term description	observed gene count	background gene count	strength	false discovery rate	matching proteins in your network (IDs)	matching proteins in your network (labels)
CL:18486	mixed, incl. Apoptosis modulation and signaling, and NF-kappa B signaling pathway	27	173	1.25	5.78e-18	9606.ENSP00000162749,9606.ENSP00000216797,9606.ENSP00000228918,9606.ENSP00000241261,9606.ENSP00000247668,9606.ENSP00000248244,9606.ENSP00000260010,9606.ENSP00000293288,9606.ENSP00000304236,9606.ENSP00000343505,9606.ENSP00000351273,9606.ENSP00000354932,9606.ENSP00000358022,9606.ENSP00000358335,9606.ENSP00000358983,9606.ENSP00000359612,9606.ENSP00000361359,9606.ENSP00000363089,9606.ENSP00000365435,…	TNFRSF1A,NFKBIA,LTBR,TNFSF10,TRAF2,TICAM1,TLR2,BAX,CD14,TNFSF13,CASP8,TLR1,MCL1,MAP3K7,NFKB2,BCL10,CD40,TLR4,TNFRSF1B,TANK,IL1R1,MYD88,IKBKB,CASP1,TRAF3,TNFAIP3,IKBKG
CL:18488	mixed, incl. NF-kappa B signaling pathway, and TIR domain	22	98	1.41	4.64e-17	9606.ENSP00000162749,9606.ENSP00000216797,9606.ENSP00000228918,9606.ENSP00000247668,9606.ENSP00000248244,9606.ENSP00000260010,9606.ENSP00000304236,9606.ENSP00000343505,9606.ENSP00000354932,9606.ENSP00000358335,9606.ENSP00000358983,9606.ENSP00000359612,9606.ENSP00000361359,9606.ENSP00000363089,9606.ENSP00000365435,9606.ENSP00000376505,9606.ENSP00000386380,9606.ENSP00000401399,9606.ENSP00000430684,…	TNFRSF1A,NFKBIA,LTBR,TRAF2,TICAM1,TLR2,CD14,TNFSF13,TLR1,MAP3K7,NFKB2,BCL10,CD40,TLR4,TNFRSF1B,TANK,IL1R1,MYD88,IKBKB,TRAF3,TNFAIP3,IKBKG
CL:18490	NF-kappa B signaling pathway, and TIR domain	21	85	1.45	6.37e-17	9606.ENSP00000162749,9606.ENSP00000216797,9606.ENSP00000228918,9606.ENSP00000247668,9606.ENSP00000248244,9606.ENSP00000260010,9606.ENSP00000304236,9606.ENSP00000343505,9606.ENSP00000354932,9606.ENSP00000358335,9606.ENSP00000358983,9606.ENSP00000361359,9606.ENSP00000363089,9606.ENSP00000365435,9606.ENSP00000376505,9606.ENSP00000386380,9606.ENSP00000401399,9606.ENSP00000430684,9606.ENSP00000454207,…	TNFRSF1A,NFKBIA,LTBR,TRAF2,TICAM1,TLR2,CD14,TNFSF13,TLR1,MAP3K7,NFKB2,CD40,TLR4,TNFRSF1B,TANK,IL1R1,MYD88,IKBKB,TRAF3,TNFAIP3,IKBKG
CL:18487	mixed, incl. NF-kappa B signaling pathway, and CARD domain	23	126	1.32	1.69e-16	9606.ENSP00000162749,9606.ENSP00000216797,9606.ENSP00000228918,9606.ENSP00000247668,9606.ENSP00000248244,9606.ENSP00000260010,9606.ENSP00000304236,9606.ENSP00000343505,9606.ENSP00000354932,9606.ENSP00000358335,9606.ENSP00000358983,9606.ENSP00000359612,9606.ENSP00000361359,9606.ENSP00000363089,9606.ENSP00000365435,9606.ENSP00000376505,9606.ENSP00000386380,9606.ENSP00000401399,9606.ENSP00000430684,…	TNFRSF1A,NFKBIA,LTBR,TRAF2,TICAM1,TLR2,CD14,TNFSF13,TLR1,MAP3K7,NFKB2,BCL10,CD40,TLR4,TNFRSF1B,TANK,IL1R1,MYD88,IKBKB,CASP1,TRAF3,TNFAIP3,IKBKG
CL:18491	NF-kappa B signaling pathway, and TIR domain	20	80	1.46	3.88e-16	9606.ENSP00000162749,9606.ENSP00000216797,9606.ENSP00000228918,9606.ENSP00000247668,9606.ENSP00000248244,9606.ENSP00000260010,9606.ENSP00000304236,9606.ENSP00000343505,9606.ENSP00000354932,9606.ENSP00000358335,9606.ENSP00000358983,9606.ENSP00000361359,9606.ENSP00000363089,9606.ENSP00000365435,9606.ENSP00000376505,9606.ENSP00000386380,9606.ENSP00000401399,9606.ENSP00000430684,9606.ENSP00000454207,…	TNFRSF1A,NFKBIA,LTBR,TRAF2,TICAM1,TLR2,CD14,TNFSF13,TLR1,MAP3K7,NFKB2,CD40,TLR4,TNFRSF1B,TANK,IL1R1,MYD88,IKBKB,TRAF3,IKBKG
CL:18492	I-kappaB kinase/NF-kappaB signaling, and interleukin-1 receptor binding	16	65	1.45	6.46e-12	9606.ENSP00000162749,9606.ENSP00000216797,9606.ENSP00000247668,9606.ENSP00000248244,9606.ENSP00000260010,9606.ENSP00000304236,9606.ENSP00000354932,9606.ENSP00000358335,9606.ENSP00000358983,9606.ENSP00000363089,9606.ENSP00000365435,9606.ENSP00000376505,9606.ENSP00000386380,9606.ENSP00000401399,9606.ENSP00000430684,9606.ENSP00000483825	TNFRSF1A,NFKBIA,TRAF2,TICAM1,TLR2,CD14,TLR1,MAP3K7,NFKB2,TLR4,TNFRSF1B,TANK,IL1R1,MYD88,IKBKB,IKBKG
CL:19380	mixed, incl. Interferon alpha/beta signaling, and negative regulation of type I interferon production	15	73	1.37	6.4e-10	9606.ENSP00000228928,9606.ENSP00000245414,9606.ENSP00000263642,9606.ENSP00000333657,9606.ENSP00000357113,9606.ENSP00000360869,9606.ENSP00000360891,9606.ENSP00000368699,9606.ENSP00000369213,9606.ENSP00000377218,9606.ENSP00000380697,9606.ENSP00000381601,9606.ENSP00000395590,9606.ENSP00000483430,9606.ENSP00000484689	OAS3,IRF1,IFIH1,MX2,IFI16,IFIT1,IFIT2,ISG15,DDX58,IRF2,IRF7,MX1,IFI35,IFI27,IFITM2
CL:19385	Interferon alpha/beta signaling, and Negative regulators of DDX58/IFIH1 signaling	14	61	1.42	1.39e-09	9606.ENSP00000228928,9606.ENSP00000245414,9606.ENSP00000263642,9606.ENSP00000333657,9606.ENSP00000357113,9606.ENSP00000360869,9606.ENSP00000360891,9606.ENSP00000368699,9606.ENSP00000369213,9606.ENSP00000380697,9606.ENSP00000381601,9606.ENSP00000395590,9606.ENSP00000483430,9606.ENSP00000484689	OAS3,IRF1,IFIH1,MX2,IFI16,IFIT1,IFIT2,ISG15,DDX58,IRF7,MX1,IFI35,IFI27,IFITM2
CL:19394	Interferon alpha/beta signaling	10	21	1.74	2.66e-08	9606.ENSP00000228928,9606.ENSP00000245414,9606.ENSP00000333657,9606.ENSP00000360869,9606.ENSP00000360891,9606.ENSP00000380697,9606.ENSP00000381601,9606.ENSP00000395590,9606.ENSP00000483430,9606.ENSP00000484689	OAS3,IRF1,MX2,IFIT1,IFIT2,IRF7,MX1,IFI35,IFI27,IFITM2
CL:19391	Interferon alpha/beta signaling, and ISG15-protein conjugation	11	36	1.55	6.99e-08	9606.ENSP00000228928,9606.ENSP00000245414,9606.ENSP00000333657,9606.ENSP00000360869,9606.ENSP00000360891,9606.ENSP00000368699,9606.ENSP00000380697,9606.ENSP00000381601,9606.ENSP00000395590,9606.ENSP00000483430,9606.ENSP00000484689	OAS3,IRF1,MX2,IFIT1,IFIT2,ISG15,IRF7,MX1,IFI35,IFI27,IFITM2
CL:18000	JAK-STAT signaling pathway	14	97	1.22	2.56e-07	9606.ENSP00000227752,9606.ENSP00000270139,9606.ENSP00000296545,9606.ENSP00000315768,9606.ENSP00000343204,9606.ENSP00000343957,9606.ENSP00000354394,9606.ENSP00000356713,9606.ENSP00000360730,9606.ENSP00000363318,9606.ENSP00000370698,9606.ENSP00000371067,9606.ENSP00000380421,9606.ENSP00000384053	IL10RA,IFNAR1,IL15,STAT2,JAK1,IFNAR2,STAT1,IFNGR1,IL13RA1,IL2RG,IL6ST,JAK2,IL15RA,CSF2RB
CL:18848	mixed, incl. Immunoregulatory interactions between a Lymphoid and a non-Lymphoid cell, and AIG1-type guanine nucleotide-binding (G) domain	14	120	1.13	2.89e-06	9606.ENSP00000250092,9606.ENSP00000252593,9606.ENSP00000271324,9606.ENSP00000271450,9606.ENSP00000284240,9606.ENSP00000341141,9606.ENSP00000356946,9606.ENSP00000357981,9606.ENSP00000386187,9606.ENSP00000412927,9606.ENSP00000418525,9606.ENSP00000444986,9606.ENSP00000457421,9606.ENSP00000469613	CD68,BST2,CD53,FCGR2A,THY1,SIGLEC1,FCGR3A,CTSS,IFITM1,HLA-G,MME,HCK,PECAM1,FLT3LG
CL:18493	I-kappaB kinase/NF-kappaB signaling, and TNF receptor-associated factor TRAF	10	40	1.46	3.38e-06	9606.ENSP00000162749,9606.ENSP00000216797,9606.ENSP00000247668,9606.ENSP00000248244,9606.ENSP00000358335,9606.ENSP00000358983,9606.ENSP00000365435,9606.ENSP00000376505,9606.ENSP00000430684,9606.ENSP00000483825	TNFRSF1A,NFKBIA,TRAF2,TICAM1,MAP3K7,NFKB2,TNFRSF1B,TANK,IKBKB,IKBKG
CL:19705	mixed, incl. Complement and coagulation cascades, and lipoprotein particle	15	189	0.96	6.47e-05	9606.ENSP00000225698,9606.ENSP00000245907,9606.ENSP00000262101,9606.ENSP00000264870,9606.ENSP00000278407,9606.ENSP00000302079,9606.ENSP00000313967,9606.ENSP00000317674,9606.ENSP00000322061,9606.ENSP00000323929,9606.ENSP00000363773,9606.ENSP00000385035,9606.ENSP00000416561,9606.ENSP00000432218,9606.ENSP00000438615	C1QBP,C3,MSR1,F13A1,SERPING1,C3AR1,C1QB,APOL1,C7,A2M,C1QA,C1S,CFB,IL32,C1R
CL:19397	Microphthalmia with limb anomalies, and Interferon alpha/beta signaling	7	16	1.7	0.00015	9606.ENSP00000228928,9606.ENSP00000333657,9606.ENSP00000360869,9606.ENSP00000360891,9606.ENSP00000380697,9606.ENSP00000381601,9606.ENSP00000395590	OAS3,MX2,IFIT1,IFIT2,IRF7,MX1,IFI35
CL:19092	mixed, incl. TAP binding, and MHC class I protein complex binding	7	18	1.65	0.00028	9606.ENSP00000346206,9606.ENSP00000364034,9606.ENSP00000365402,9606.ENSP00000365817,9606.ENSP00000379873,9606.ENSP00000399168,9606.ENSP00000404833	TAP1,TAP2,HLA-C,HLA-E,HLA-A,HLA-B,TAPBP
CL:19706	mixed, incl. Complement and coagulation cascades, and lipoprotein particle	14	182	0.95	0.00032	9606.ENSP00000225698,9606.ENSP00000245907,9606.ENSP00000262101,9606.ENSP00000264870,9606.ENSP00000278407,9606.ENSP00000302079,9606.ENSP00000313967,9606.ENSP00000317674,9606.ENSP00000322061,9606.ENSP00000323929,9606.ENSP00000363773,9606.ENSP00000385035,9606.ENSP00000416561,9606.ENSP00000438615	C1QBP,C3,MSR1,F13A1,SERPING1,C3AR1,C1QB,APOL1,C7,A2M,C1QA,C1S,CFB,C1R
CL:19966	Complement cascade	9	49	1.33	0.00032	9606.ENSP00000245907,9606.ENSP00000278407,9606.ENSP00000302079,9606.ENSP00000313967,9606.ENSP00000322061,9606.ENSP00000363773,9606.ENSP00000385035,9606.ENSP00000416561,9606.ENSP00000438615	C3,SERPING1,C3AR1,C1QB,C7,C1QA,C1S,CFB,C1R
CL:18006	Immune response to tuberculosis, and interleukin-6 receptor complex	7	19	1.63	0.00033	9606.ENSP00000270139,9606.ENSP00000315768,9606.ENSP00000343204,9606.ENSP00000343957,9606.ENSP00000354394,9606.ENSP00000356713,9606.ENSP00000370698	IFNAR1,STAT2,JAK1,IFNAR2,STAT1,IFNGR1,IL6ST
CL:19314	MHC II	6	10	1.84	0.0005	9606.ENSP00000009530,9606.ENSP00000363976,9606.ENSP00000378786,9606.ENSP00000393566,9606.ENSP00000398890,9606.ENSP00000408146	CD74,HLA-DMA,HLA-DRA,HLA-DPA1,HLA-DMB,HLA-DPB1
CL:19968	Complement cascade	8	37	1.4	0.00074	9606.ENSP00000245907,9606.ENSP00000278407,9606.ENSP00000302079,9606.ENSP00000313967,9606.ENSP00000363773,9606.ENSP00000385035,9606.ENSP00000416561,9606.ENSP00000438615	C3,SERPING1,C3AR1,C1QB,C1QA,C1S,CFB,C1R
CL:16868	Integrin domain superfamily, and hematopoietic stem cell migration to bone marrow	7	25	1.51	0.0014	9606.ENSP00000264832,9606.ENSP00000293379,9606.ENSP00000294728,9606.ENSP00000346839,9606.ENSP00000349252,9606.ENSP00000380948,9606.ENSP00000452786	ICAM1,ITGA5,VCAM1,FN1,ITGAL,ITGB2,ITGB3
CL:18494	TNFR1-induced NFkappaB signaling pathway, and negative regulation of MyD88-independent toll-like receptor signaling pathway	7	25	1.51	0.0014	9606.ENSP00000162749,9606.ENSP00000247668,9606.ENSP00000248244,9606.ENSP00000358335,9606.ENSP00000365435,9606.ENSP00000376505,9606.ENSP00000483825	TNFRSF1A,TRAF2,TICAM1,MAP3K7,TNFRSF1B,TANK,IKBKG
CL:18002	Overview of interferons-mediated signaling pathway, and Interleukin-10, conserved site	8	43	1.33	0.0018	9606.ENSP00000227752,9606.ENSP00000270139,9606.ENSP00000315768,9606.ENSP00000343204,9606.ENSP00000343957,9606.ENSP00000354394,9606.ENSP00000356713,9606.ENSP00000370698	IL10RA,IFNAR1,STAT2,JAK1,IFNAR2,STAT1,IFNGR1,IL6ST
CL:19992	Classical antibody-mediated complement activation	5	6	1.98	0.0029	9606.ENSP00000278407,9606.ENSP00000313967,9606.ENSP00000363773,9606.ENSP00000385035,9606.ENSP00000438615	SERPING1,C1QB,C1QA,C1S,C1R
CL:16870	Integrin domain superfamily, and hematopoietic stem cell migration to bone marrow	6	18	1.58	0.0064	9606.ENSP00000264832,9606.ENSP00000293379,9606.ENSP00000294728,9606.ENSP00000346839,9606.ENSP00000349252,9606.ENSP00000380948	ICAM1,ITGA5,VCAM1,FN1,ITGAL,ITGB2
CL:19310	mixed, incl. MHC class II protein complex, and MHC class II deficiency	7	33	1.39	0.0064	9606.ENSP00000009530,9606.ENSP00000262510,9606.ENSP00000363976,9606.ENSP00000378786,9606.ENSP00000393566,9606.ENSP00000398890,9606.ENSP00000408146	CD74,NLRC5,HLA-DMA,HLA-DRA,HLA-DPA1,HLA-DMB,HLA-DPB1
CL:18980	mixed, incl. Hematopoietic cell lineage, and sialic acid binding	8	54	1.23	0.0075	9606.ENSP00000250092,9606.ENSP00000252593,9606.ENSP00000284240,9606.ENSP00000341141,9606.ENSP00000386187,9606.ENSP00000418525,9606.ENSP00000457421,9606.ENSP00000469613	CD68,BST2,THY1,SIGLEC1,IFITM1,MME,PECAM1,FLT3LG
CL:19088	mixed, incl. Immunoregulatory interactions between a Lymphoid and a non-Lymphoid cell, and natural killer cell mediated immunity	9	79	1.12	0.0084	9606.ENSP00000300134,9606.ENSP00000312367,9606.ENSP00000346206,9606.ENSP00000364034,9606.ENSP00000365402,9606.ENSP00000365817,9606.ENSP00000379873,9606.ENSP00000399168,9606.ENSP00000404833	STAT6,CD84,TAP1,TAP2,HLA-C,HLA-E,HLA-A,HLA-B,TAPBP
CL:19089	mixed, incl. regulation of natural killer cell mediated immunity, and Antigen processing and presentation	8	57	1.21	0.0104	9606.ENSP00000312367,9606.ENSP00000346206,9606.ENSP00000364034,9606.ENSP00000365402,9606.ENSP00000365817,9606.ENSP00000379873,9606.ENSP00000399168,9606.ENSP00000404833	CD84,TAP1,TAP2,HLA-C,HLA-E,HLA-A,HLA-B,TAPBP
CL:19970	Initial triggering of complement, and Complement component 3 deficiency	6	21	1.52	0.0113	9606.ENSP00000278407,9606.ENSP00000302079,9606.ENSP00000313967,9606.ENSP00000363773,9606.ENSP00000385035,9606.ENSP00000438615	SERPING1,C3AR1,C1QB,C1QA,C1S,C1R
CL:19087	mixed, incl. Immunoregulatory interactions between a Lymphoid and a non-Lymphoid cell, and TNFs bind their physiological receptors	10	112	1.01	0.012	9606.ENSP00000300134,9606.ENSP00000312367,9606.ENSP00000320084,9606.ENSP00000346206,9606.ENSP00000364034,9606.ENSP00000365402,9606.ENSP00000365817,9606.ENSP00000379873,9606.ENSP00000399168,9606.ENSP00000404833	STAT6,CD84,CD276,TAP1,TAP2,HLA-C,HLA-E,HLA-A,HLA-B,TAPBP
CL:18573	IRAK4 deficiency (TLR2/4), and interleukin-1 receptor binding	6	23	1.48	0.0171	9606.ENSP00000260010,9606.ENSP00000304236,9606.ENSP00000354932,9606.ENSP00000363089,9606.ENSP00000386380,9606.ENSP00000401399	TLR2,CD14,TLR1,TLR4,IL1R1,MYD88
CL:19399	mixed, incl. 2-5-oligoadenylate synthetase activity, and Nephropathia epidemica	5	11	1.72	0.0201	9606.ENSP00000228928,9606.ENSP00000333657,9606.ENSP00000360869,9606.ENSP00000360891,9606.ENSP00000395590	OAS3,MX2,IFIT1,IFIT2,IFI35
CL:18264	Chemokine receptors bind chemokines, and Intercrine alpha family (small cytokine C-X-C) (chemokine CXC).	9	91	1.06	0.0223	9606.ENSP00000011653,9606.ENSP00000225831,9606.ENSP00000259607,9606.ENSP00000293778,9606.ENSP00000296140,9606.ENSP00000302935,9606.ENSP00000386884,9606.ENSP00000420298,9606.ENSP00000474412	CD4,CCL2,CCL21,CXCL16,CCR1,IL16,CXCR4,CD200,CCL5
CL:18266	Chemokine receptors bind chemokines, and macrophage proliferation	8	67	1.14	0.0277	9606.ENSP00000011653,9606.ENSP00000225831,9606.ENSP00000259607,9606.ENSP00000293778,9606.ENSP00000296140,9606.ENSP00000302935,9606.ENSP00000420298,9606.ENSP00000474412	CD4,CCL2,CCL21,CXCL16,CCR1,IL16,CD200,CCL5
Analysis LN5 v MN. Input 26. 5 Clusters	term description	observed gene count	background gene count	strength	false discovery rate	matching proteins in your network (IDs)	matching proteins in your network (labels)
CL:19385	Interferon alpha/beta signaling, and Negative regulators of DDX58/IFIH1 signaling	10	61	2.09	4.99e-12	9606.ENSP00000228928,9606.ENSP00000263642,9606.ENSP00000333657,9606.ENSP00000360869,9606.ENSP00000368699,9606.ENSP00000369213,9606.ENSP00000380697,9606.ENSP00000381601,9606.ENSP00000395590,9606.ENSP00000483430	OAS3,IFIH1,MX2,IFIT1,ISG15,DDX58,IRF7,MX1,IFI35,IFI27
CL:19391	Interferon alpha/beta signaling, and ISG15-protein conjugation	8	36	2.22	4.88e-10	9606.ENSP00000228928,9606.ENSP00000333657,9606.ENSP00000360869,9606.ENSP00000368699,9606.ENSP00000380697,9606.ENSP00000381601,9606.ENSP00000395590,9606.ENSP00000483430	OAS3,MX2,IFIT1,ISG15,IRF7,MX1,IFI35,IFI27
CL:19394	Interferon alpha/beta signaling	7	21	2.4	2.43e-09	9606.ENSP00000228928,9606.ENSP00000333657,9606.ENSP00000360869,9606.ENSP00000380697,9606.ENSP00000381601,9606.ENSP00000395590,9606.ENSP00000483430	OAS3,MX2,IFIT1,IRF7,MX1,IFI35,IFI27
CL:19397	Microphthalmia with limb anomalies, and Interferon alpha/beta signaling	6	16	2.45	1.32e-07	9606.ENSP00000228928,9606.ENSP00000333657,9606.ENSP00000360869,9606.ENSP00000380697,9606.ENSP00000381601,9606.ENSP00000395590	OAS3,MX2,IFIT1,IRF7,MX1,IFI35
CL:19399	mixed, incl. 2-5-oligoadenylate synthetase activity, and Nephropathia epidemica	4	11	2.44	0.0018	9606.ENSP00000228928,9606.ENSP00000333657,9606.ENSP00000360869,9606.ENSP00000395590	OAS3,MX2,IFIT1,IFI35
Analysis LN3 v TBM. Input 63. 10 Clusters	term description	observed gene count	background gene count	strength	false discovery rate	matching proteins in your network (IDs)	matching proteins in your network (labels)
CL:19385	Interferon alpha/beta signaling, and Negative regulators of DDX58/IFIH1 signaling	12	61	1.79	2.47e-11	9606.ENSP00000228928,9606.ENSP00000263642,9606.ENSP00000333657,9606.ENSP00000357113,9606.ENSP00000360869,9606.ENSP00000368699,9606.ENSP00000369213,9606.ENSP00000380697,9606.ENSP00000381601,9606.ENSP00000395590,9606.ENSP00000483430,9606.ENSP00000484689	OAS3,IFIH1,MX2,IFI16,IFIT1,ISG15,DDX58,IRF7,MX1,IFI35,IFI27,IFITM2
CL:19391	Interferon alpha/beta signaling, and ISG15-protein conjugation	9	36	1.9	1.35e-08	9606.ENSP00000228928,9606.ENSP00000333657,9606.ENSP00000360869,9606.ENSP00000368699,9606.ENSP00000380697,9606.ENSP00000381601,9606.ENSP00000395590,9606.ENSP00000483430,9606.ENSP00000484689	OAS3,MX2,IFIT1,ISG15,IRF7,MX1,IFI35,IFI27,IFITM2
CL:19394	Interferon alpha/beta signaling	8	21	2.08	2.05e-08	9606.ENSP00000228928,9606.ENSP00000333657,9606.ENSP00000360869,9606.ENSP00000380697,9606.ENSP00000381601,9606.ENSP00000395590,9606.ENSP00000483430,9606.ENSP00000484689	OAS3,MX2,IFIT1,IRF7,MX1,IFI35,IFI27,IFITM2
CL:19397	Microphthalmia with limb anomalies, and Interferon alpha/beta signaling	6	16	2.07	3.39e-05	9606.ENSP00000228928,9606.ENSP00000333657,9606.ENSP00000360869,9606.ENSP00000380697,9606.ENSP00000381601,9606.ENSP00000395590	OAS3,MX2,IFIT1,IRF7,MX1,IFI35
CL:19092	mixed, incl. TAP binding, and MHC class I protein complex binding	6	18	2.02	5.41e-05	9606.ENSP00000364034,9606.ENSP00000365402,9606.ENSP00000365817,9606.ENSP00000379873,9606.ENSP00000399168,9606.ENSP00000404833	TAP2,HLA-C,HLA-E,HLA-A,HLA-B,TAPBP
CL:19992	Classical antibody-mediated complement activation	5	6	2.42	5.92e-05	9606.ENSP00000278407,9606.ENSP00000313967,9606.ENSP00000363773,9606.ENSP00000385035,9606.ENSP00000438615	SERPING1,C1QB,C1QA,C1S,C1R
CL:18848	mixed, incl. Immunoregulatory interactions between a Lymphoid and a non-Lymphoid cell, and AIG1-type guanine nucleotide-binding (G) domain	9	120	1.37	0.00012	9606.ENSP00000252593,9606.ENSP00000271324,9606.ENSP00000271450,9606.ENSP00000284240,9606.ENSP00000341141,9606.ENSP00000356946,9606.ENSP00000357981,9606.ENSP00000386187,9606.ENSP00000444986	BST2,CD53,FCGR2A,THY1,SIGLEC1,FCGR3A,CTSS,IFITM1,HCK
CL:19314	MHC II	4	10	2.1	0.0269	9606.ENSP00000009530,9606.ENSP00000378786,9606.ENSP00000398890,9606.ENSP00000408146	CD74,HLA-DRA,HLA-DMB,HLA-DPB1
CL:19399	mixed, incl. 2-5-oligoadenylate synthetase activity, and Nephropathia epidemica	4	11	2.06	0.0344	9606.ENSP00000228928,9606.ENSP00000333657,9606.ENSP00000360869,9606.ENSP00000395590	OAS3,MX2,IFIT1,IFI35
CL:19706	mixed, incl. Complement and coagulation cascades, and lipoprotein particle	8	182	1.14	0.039	9606.ENSP00000262101,9606.ENSP00000264870,9606.ENSP00000278407,9606.ENSP00000313967,9606.ENSP00000317674,9606.ENSP00000363773,9606.ENSP00000385035,9606.ENSP00000438615	MSR1,F13A1,SERPING1,C1QB,APOL1,C1QA,C1S,C1R
Analysis LN4 v TBM. Input 205. 37 Clusters	term description	observed gene count	background gene count	strength	false discovery rate	matching proteins in your network (IDs)	matching proteins in your network (labels)
CL:18486	mixed, incl. Apoptosis modulation and signaling, and NF-kappa B signaling pathway	35	173	1.29	1.01e-25	9606.ENSP00000162749,9606.ENSP00000216797,9606.ENSP00000220751,9606.ENSP00000222823,9606.ENSP00000228918,9606.ENSP00000241261,9606.ENSP00000247668,9606.ENSP00000248244,9606.ENSP00000260010,9606.ENSP00000276431,9606.ENSP00000293288,9606.ENSP00000296795,9606.ENSP00000301838,9606.ENSP00000304236,9606.ENSP00000311032,9606.ENSP00000326737,9606.ENSP00000343505,9606.ENSP00000351273,9606.ENSP00000351908,…	TNFRSF1A,NFKBIA,RIPK2,NOD1,LTBR,TNFSF10,TRAF2,TICAM1,TLR2,TNFRSF10B,BAX,TLR3,FADD,CD14,CASP3,TNFRSF12A,TNFSF13,CASP8,MAP3K5,TLR1,MCL1,MAP3K7,NFKB2,BCL10,CD40,TLR4,TNFRSF1B,TANK,IL1R1,MYD88,IKBKB,CASP1,TRAF3,TNFAIP3,IKBKG
CL:18487	mixed, incl. NF-kappa B signaling pathway, and CARD domain	28	126	1.33	8.2e-21	9606.ENSP00000162749,9606.ENSP00000216797,9606.ENSP00000220751,9606.ENSP00000222823,9606.ENSP00000228918,9606.ENSP00000247668,9606.ENSP00000248244,9606.ENSP00000260010,9606.ENSP00000296795,9606.ENSP00000304236,9606.ENSP00000326737,9606.ENSP00000343505,9606.ENSP00000351908,9606.ENSP00000354932,9606.ENSP00000358335,9606.ENSP00000358983,9606.ENSP00000359612,9606.ENSP00000361359,9606.ENSP00000363089,…	TNFRSF1A,NFKBIA,RIPK2,NOD1,LTBR,TRAF2,TICAM1,TLR2,TLR3,CD14,TNFRSF12A,TNFSF13,MAP3K5,TLR1,MAP3K7,NFKB2,BCL10,CD40,TLR4,TNFRSF1B,TANK,IL1R1,MYD88,IKBKB,CASP1,TRAF3,TNFAIP3,IKBKG
CL:18488	mixed, incl. NF-kappa B signaling pathway, and TIR domain	25	98	1.39	2.06e-19	9606.ENSP00000162749,9606.ENSP00000216797,9606.ENSP00000228918,9606.ENSP00000247668,9606.ENSP00000248244,9606.ENSP00000260010,9606.ENSP00000296795,9606.ENSP00000304236,9606.ENSP00000326737,9606.ENSP00000343505,9606.ENSP00000351908,9606.ENSP00000354932,9606.ENSP00000358335,9606.ENSP00000358983,9606.ENSP00000359612,9606.ENSP00000361359,9606.ENSP00000363089,9606.ENSP00000365435,9606.ENSP00000376505,…	TNFRSF1A,NFKBIA,LTBR,TRAF2,TICAM1,TLR2,TLR3,CD14,TNFRSF12A,TNFSF13,MAP3K5,TLR1,MAP3K7,NFKB2,BCL10,CD40,TLR4,TNFRSF1B,TANK,IL1R1,MYD88,IKBKB,TRAF3,TNFAIP3,IKBKG
CL:18490	NF-kappa B signaling pathway, and TIR domain	24	85	1.43	2.06e-19	9606.ENSP00000162749,9606.ENSP00000216797,9606.ENSP00000228918,9606.ENSP00000247668,9606.ENSP00000248244,9606.ENSP00000260010,9606.ENSP00000296795,9606.ENSP00000304236,9606.ENSP00000326737,9606.ENSP00000343505,9606.ENSP00000351908,9606.ENSP00000354932,9606.ENSP00000358335,9606.ENSP00000358983,9606.ENSP00000361359,9606.ENSP00000363089,9606.ENSP00000365435,9606.ENSP00000376505,9606.ENSP00000386380,…	TNFRSF1A,NFKBIA,LTBR,TRAF2,TICAM1,TLR2,TLR3,CD14,TNFRSF12A,TNFSF13,MAP3K5,TLR1,MAP3K7,NFKB2,CD40,TLR4,TNFRSF1B,TANK,IL1R1,MYD88,IKBKB,TRAF3,TNFAIP3,IKBKG
CL:18491	NF-kappa B signaling pathway, and TIR domain	23	80	1.44	1.23e-18	9606.ENSP00000162749,9606.ENSP00000216797,9606.ENSP00000228918,9606.ENSP00000247668,9606.ENSP00000248244,9606.ENSP00000260010,9606.ENSP00000296795,9606.ENSP00000304236,9606.ENSP00000326737,9606.ENSP00000343505,9606.ENSP00000351908,9606.ENSP00000354932,9606.ENSP00000358335,9606.ENSP00000358983,9606.ENSP00000361359,9606.ENSP00000363089,9606.ENSP00000365435,9606.ENSP00000376505,9606.ENSP00000386380,…	TNFRSF1A,NFKBIA,LTBR,TRAF2,TICAM1,TLR2,TLR3,CD14,TNFRSF12A,TNFSF13,MAP3K5,TLR1,MAP3K7,NFKB2,CD40,TLR4,TNFRSF1B,TANK,IL1R1,MYD88,IKBKB,TRAF3,IKBKG
CL:18492	I-kappaB kinase/NF-kappaB signaling, and interleukin-1 receptor binding	18	65	1.42	2.38e-13	9606.ENSP00000162749,9606.ENSP00000216797,9606.ENSP00000247668,9606.ENSP00000248244,9606.ENSP00000260010,9606.ENSP00000296795,9606.ENSP00000304236,9606.ENSP00000351908,9606.ENSP00000354932,9606.ENSP00000358335,9606.ENSP00000358983,9606.ENSP00000363089,9606.ENSP00000365435,9606.ENSP00000376505,9606.ENSP00000386380,9606.ENSP00000401399,9606.ENSP00000430684,9606.ENSP00000483825	TNFRSF1A,NFKBIA,TRAF2,TICAM1,TLR2,TLR3,CD14,MAP3K5,TLR1,MAP3K7,NFKB2,TLR4,TNFRSF1B,TANK,IL1R1,MYD88,IKBKB,IKBKG
CL:19385	Interferon alpha/beta signaling, and Negative regulators of DDX58/IFIH1 signaling	14	61	1.34	1.95e-08	9606.ENSP00000228928,9606.ENSP00000245414,9606.ENSP00000263642,9606.ENSP00000333657,9606.ENSP00000357113,9606.ENSP00000360869,9606.ENSP00000360891,9606.ENSP00000368699,9606.ENSP00000369213,9606.ENSP00000380697,9606.ENSP00000381601,9606.ENSP00000395590,9606.ENSP00000483430,9606.ENSP00000484689	OAS3,IRF1,IFIH1,MX2,IFI16,IFIT1,IFIT2,ISG15,DDX58,IRF7,MX1,IFI35,IFI27,IFITM2
CL:18493	I-kappaB kinase/NF-kappaB signaling, and TNF receptor-associated factor TRAF	12	40	1.46	7.38e-08	9606.ENSP00000162749,9606.ENSP00000216797,9606.ENSP00000247668,9606.ENSP00000248244,9606.ENSP00000296795,9606.ENSP00000351908,9606.ENSP00000358335,9606.ENSP00000358983,9606.ENSP00000365435,9606.ENSP00000376505,9606.ENSP00000430684,9606.ENSP00000483825	TNFRSF1A,NFKBIA,TRAF2,TICAM1,TLR3,MAP3K5,MAP3K7,NFKB2,TNFRSF1B,TANK,IKBKB,IKBKG
CL:19394	Interferon alpha/beta signaling	10	21	1.66	1.64e-07	9606.ENSP00000228928,9606.ENSP00000245414,9606.ENSP00000333657,9606.ENSP00000360869,9606.ENSP00000360891,9606.ENSP00000380697,9606.ENSP00000381601,9606.ENSP00000395590,9606.ENSP00000483430,9606.ENSP00000484689	OAS3,IRF1,MX2,IFIT1,IFIT2,IRF7,MX1,IFI35,IFI27,IFITM2
CL:18848	mixed, incl. Immunoregulatory interactions between a Lymphoid and a non-Lymphoid cell, and AIG1-type guanine nucleotide-binding (G) domain	16	120	1.11	2.81e-07	9606.ENSP00000250092,9606.ENSP00000252593,9606.ENSP00000263645,9606.ENSP00000271324,9606.ENSP00000271450,9606.ENSP00000284240,9606.ENSP00000341141,9606.ENSP00000344115,9606.ENSP00000356946,9606.ENSP00000357981,9606.ENSP00000386187,9606.ENSP00000412927,9606.ENSP00000418525,9606.ENSP00000444986,9606.ENSP00000457421,9606.ENSP00000469613	CD68,BST2,CD81,CD53,FCGR2A,THY1,SIGLEC1,CDH5,FCGR3A,CTSS,IFITM1,HLA-G,MME,HCK,PECAM1,FLT3LG
CL:19391	Interferon alpha/beta signaling, and ISG15-protein conjugation	11	36	1.47	4.41e-07	9606.ENSP00000228928,9606.ENSP00000245414,9606.ENSP00000333657,9606.ENSP00000360869,9606.ENSP00000360891,9606.ENSP00000368699,9606.ENSP00000380697,9606.ENSP00000381601,9606.ENSP00000395590,9606.ENSP00000483430,9606.ENSP00000484689	OAS3,IRF1,MX2,IFIT1,IFIT2,ISG15,IRF7,MX1,IFI35,IFI27,IFITM2
CL:16868	Integrin domain superfamily, and hematopoietic stem cell migration to bone marrow	9	25	1.54	1.34e-05	9606.ENSP00000264832,9606.ENSP00000293379,9606.ENSP00000294728,9606.ENSP00000346839,9606.ENSP00000349252,9606.ENSP00000379350,9606.ENSP00000380948,9606.ENSP00000441691,9606.ENSP00000452786	ICAM1,ITGA5,VCAM1,FN1,ITGAL,ITGB1,ITGB2,ITGAM,ITGB3
CL:18494	TNFR1-induced NFkappaB signaling pathway, and negative regulation of MyD88-independent toll-like receptor signaling pathway	9	25	1.54	1.34e-05	9606.ENSP00000162749,9606.ENSP00000247668,9606.ENSP00000248244,9606.ENSP00000296795,9606.ENSP00000351908,9606.ENSP00000358335,9606.ENSP00000365435,9606.ENSP00000376505,9606.ENSP00000483825	TNFRSF1A,TRAF2,TICAM1,TLR3,MAP3K5,MAP3K7,TNFRSF1B,TANK,IKBKG
CL:16870	Integrin domain superfamily, and hematopoietic stem cell migration to bone marrow	8	18	1.63	3.83e-05	9606.ENSP00000264832,9606.ENSP00000293379,9606.ENSP00000294728,9606.ENSP00000346839,9606.ENSP00000349252,9606.ENSP00000379350,9606.ENSP00000380948,9606.ENSP00000441691	ICAM1,ITGA5,VCAM1,FN1,ITGAL,ITGB1,ITGB2,ITGAM
CL:18980	mixed, incl. Hematopoietic cell lineage, and sialic acid binding	10	54	1.25	0.00025	9606.ENSP00000250092,9606.ENSP00000252593,9606.ENSP00000263645,9606.ENSP00000284240,9606.ENSP00000341141,9606.ENSP00000344115,9606.ENSP00000386187,9606.ENSP00000418525,9606.ENSP00000457421,9606.ENSP00000469613	CD68,BST2,CD81,THY1,SIGLEC1,CDH5,IFITM1,MME,PECAM1,FLT3LG
CL:18000	JAK-STAT signaling pathway	12	97	1.07	0.00032	9606.ENSP00000227752,9606.ENSP00000315768,9606.ENSP00000343204,9606.ENSP00000343957,9606.ENSP00000354394,9606.ENSP00000356713,9606.ENSP00000360730,9606.ENSP00000370698,9606.ENSP00000371067,9606.ENSP00000379111,9606.ENSP00000380421,9606.ENSP00000384053	IL10RA,STAT2,JAK1,IFNAR2,STAT1,IFNGR1,IL13RA1,IL6ST,JAK2,IL4R,IL15RA,CSF2RB
CL:17997	JAK-STAT signaling pathway	13	122	1.01	0.00033	9606.ENSP00000227752,9606.ENSP00000233954,9606.ENSP00000315768,9606.ENSP00000343204,9606.ENSP00000343957,9606.ENSP00000354394,9606.ENSP00000356713,9606.ENSP00000360730,9606.ENSP00000370698,9606.ENSP00000371067,9606.ENSP00000379111,9606.ENSP00000380421,9606.ENSP00000384053	IL10RA,IL1RL1,STAT2,JAK1,IFNAR2,STAT1,IFNGR1,IL13RA1,IL6ST,JAK2,IL4R,IL15RA,CSF2RB
CL:16805	protein complex involved in cell adhesion, and MET activates PTK2 signaling	10	57	1.23	0.00035	9606.ENSP00000264036,9606.ENSP00000264832,9606.ENSP00000293379,9606.ENSP00000294728,9606.ENSP00000346839,9606.ENSP00000349252,9606.ENSP00000379350,9606.ENSP00000380948,9606.ENSP00000441691,9606.ENSP00000452786	MCAM,ICAM1,ITGA5,VCAM1,FN1,ITGAL,ITGB1,ITGB2,ITGAM,ITGB3
CL:19397	Microphthalmia with limb anomalies, and Interferon alpha/beta signaling	7	16	1.62	0.00049	9606.ENSP00000228928,9606.ENSP00000333657,9606.ENSP00000360869,9606.ENSP00000360891,9606.ENSP00000380697,9606.ENSP00000381601,9606.ENSP00000395590	OAS3,MX2,IFIT1,IFIT2,IRF7,MX1,IFI35
CL:19705	mixed, incl. Complement and coagulation cascades, and lipoprotein particle	15	189	0.88	0.00067	9606.ENSP00000225698,9606.ENSP00000245907,9606.ENSP00000262101,9606.ENSP00000264870,9606.ENSP00000278407,9606.ENSP00000313967,9606.ENSP00000317674,9606.ENSP00000322061,9606.ENSP00000323929,9606.ENSP00000363773,9606.ENSP00000366307,9606.ENSP00000385035,9606.ENSP00000416561,9606.ENSP00000432218,9606.ENSP00000438615	C1QBP,C3,MSR1,F13A1,SERPING1,C1QB,APOL1,C7,A2M,C1QA,THBD,C1S,CFB,IL32,C1R
CL:19092	mixed, incl. TAP binding, and MHC class I protein complex binding	7	18	1.57	0.00083	9606.ENSP00000346206,9606.ENSP00000364034,9606.ENSP00000365402,9606.ENSP00000365817,9606.ENSP00000379873,9606.ENSP00000399168,9606.ENSP00000404833	TAP1,TAP2,HLA-C,HLA-E,HLA-A,HLA-B,TAPBP
CL:19314	MHC II	6	10	1.76	0.0013	9606.ENSP00000009530,9606.ENSP00000363976,9606.ENSP00000378786,9606.ENSP00000393566,9606.ENSP00000398890,9606.ENSP00000408146	CD74,HLA-DMA,HLA-DRA,HLA-DPA1,HLA-DMB,HLA-DPB1
CL:19706	mixed, incl. Complement and coagulation cascades, and lipoprotein particle	14	182	0.87	0.0026	9606.ENSP00000225698,9606.ENSP00000245907,9606.ENSP00000262101,9606.ENSP00000264870,9606.ENSP00000278407,9606.ENSP00000313967,9606.ENSP00000317674,9606.ENSP00000322061,9606.ENSP00000323929,9606.ENSP00000363773,9606.ENSP00000366307,9606.ENSP00000385035,9606.ENSP00000416561,9606.ENSP00000438615	C1QBP,C3,MSR1,F13A1,SERPING1,C1QB,APOL1,C7,A2M,C1QA,THBD,C1S,CFB,C1R
CL:19992	Classical antibody-mediated complement activation	5	6	1.9	0.007	9606.ENSP00000278407,9606.ENSP00000313967,9606.ENSP00000363773,9606.ENSP00000385035,9606.ENSP00000438615	SERPING1,C1QB,C1QA,C1S,C1R
CL:19087	mixed, incl. Immunoregulatory interactions between a Lymphoid and a non-Lymphoid cell, and TNFs bind their physiological receptors	11	112	0.97	0.0085	9606.ENSP00000300134,9606.ENSP00000312002,9606.ENSP00000312367,9606.ENSP00000320084,9606.ENSP00000346206,9606.ENSP00000364034,9606.ENSP00000365402,9606.ENSP00000365817,9606.ENSP00000379873,9606.ENSP00000399168,9606.ENSP00000404833	STAT6,HAVCR2,CD84,CD276,TAP1,TAP2,HLA-C,HLA-E,HLA-A,HLA-B,TAPBP
CL:18266	Chemokine receptors bind chemokines, and macrophage proliferation	9	67	1.11	0.0115	9606.ENSP00000011653,9606.ENSP00000225831,9606.ENSP00000259607,9606.ENSP00000293778,9606.ENSP00000296140,9606.ENSP00000302935,9606.ENSP00000327513,9606.ENSP00000420298,9606.ENSP00000474412	CD4,CCL2,CCL21,CXCL16,CCR1,IL16,CSF1,CD200,CCL5
CL:18264	Chemokine receptors bind chemokines, and Intercrine alpha family (small cytokine C-X-C) (chemokine CXC).	10	91	1.02	0.012	9606.ENSP00000011653,9606.ENSP00000225831,9606.ENSP00000259607,9606.ENSP00000293778,9606.ENSP00000296140,9606.ENSP00000302935,9606.ENSP00000327513,9606.ENSP00000386884,9606.ENSP00000420298,9606.ENSP00000474412	CD4,CCL2,CCL21,CXCL16,CCR1,IL16,CSF1,CXCR4,CD200,CCL5
CL:19966	Complement cascade	8	49	1.19	0.015	9606.ENSP00000245907,9606.ENSP00000278407,9606.ENSP00000313967,9606.ENSP00000322061,9606.ENSP00000363773,9606.ENSP00000385035,9606.ENSP00000416561,9606.ENSP00000438615	C3,SERPING1,C1QB,C7,C1QA,C1S,CFB,C1R
CL:19310	mixed, incl. MHC class II protein complex, and MHC class II deficiency	7	33	1.31	0.0187	9606.ENSP00000009530,9606.ENSP00000262510,9606.ENSP00000363976,9606.ENSP00000378786,9606.ENSP00000393566,9606.ENSP00000398890,9606.ENSP00000408146	CD74,NLRC5,HLA-DMA,HLA-DRA,HLA-DPA1,HLA-DMB,HLA-DPB1
CL:18006	Immune response to tuberculosis, and interleukin-6 receptor complex	6	19	1.48	0.0196	9606.ENSP00000315768,9606.ENSP00000343204,9606.ENSP00000343957,9606.ENSP00000354394,9606.ENSP00000356713,9606.ENSP00000370698	STAT2,JAK1,IFNAR2,STAT1,IFNGR1,IL6ST
CL:18982	mixed, incl. Histiocytosis, and Hematopoietic cell lineage	7	35	1.28	0.0253	9606.ENSP00000250092,9606.ENSP00000252593,9606.ENSP00000284240,9606.ENSP00000344115,9606.ENSP00000418525,9606.ENSP00000457421,9606.ENSP00000469613	CD68,BST2,THY1,CDH5,MME,PECAM1,FLT3LG
CL:18741	Nanomaterial induced apoptosis, and TRAIL binding	7	37	1.26	0.0346	9606.ENSP00000241261,9606.ENSP00000276431,9606.ENSP00000293288,9606.ENSP00000301838,9606.ENSP00000311032,9606.ENSP00000351273,9606.ENSP00000358022	TNFSF10,TNFRSF10B,BAX,FADD,CASP3,CASP8,MCL1
CL:19088	mixed, incl. Immunoregulatory interactions between a Lymphoid and a non-Lymphoid cell, and natural killer cell mediated immunity	9	79	1.04	0.0346	9606.ENSP00000300134,9606.ENSP00000312367,9606.ENSP00000346206,9606.ENSP00000364034,9606.ENSP00000365402,9606.ENSP00000365817,9606.ENSP00000379873,9606.ENSP00000399168,9606.ENSP00000404833	STAT6,CD84,TAP1,TAP2,HLA-C,HLA-E,HLA-A,HLA-B,TAPBP
CL:19968	Complement cascade	7	37	1.26	0.0346	9606.ENSP00000245907,9606.ENSP00000278407,9606.ENSP00000313967,9606.ENSP00000363773,9606.ENSP00000385035,9606.ENSP00000416561,9606.ENSP00000438615	C3,SERPING1,C1QB,C1QA,C1S,CFB,C1R
CL:19089	mixed, incl. regulation of natural killer cell mediated immunity, and Antigen processing and presentation	8	57	1.13	0.0355	9606.ENSP00000312367,9606.ENSP00000346206,9606.ENSP00000364034,9606.ENSP00000365402,9606.ENSP00000365817,9606.ENSP00000379873,9606.ENSP00000399168,9606.ENSP00000404833	CD84,TAP1,TAP2,HLA-C,HLA-E,HLA-A,HLA-B,TAPBP
CL:18573	IRAK4 deficiency (TLR2/4), and interleukin-1 receptor binding	6	23	1.4	0.0444	9606.ENSP00000260010,9606.ENSP00000304236,9606.ENSP00000354932,9606.ENSP00000363089,9606.ENSP00000386380,9606.ENSP00000401399	TLR2,CD14,TLR1,TLR4,IL1R1,MYD88
CL:19399	mixed, incl. 2-5-oligoadenylate synthetase activity, and Nephropathia epidemica	5	11	1.64	0.0444	9606.ENSP00000228928,9606.ENSP00000333657,9606.ENSP00000360869,9606.ENSP00000360891,9606.ENSP00000395590	OAS3,MX2,IFIT1,IFIT2,IFI35
Analysis LN5 v TBM. Input 9. 13 Clusters	term description	observed gene count	background gene count	strength	false discovery rate	matching proteins in your network (IDs)	matching proteins in your network (labels)
CL:19385	Interferon alpha/beta signaling, and Negative regulators of DDX58/IFIH1 signaling	13	61	1.64	1.34e-10	9606.ENSP00000228928,9606.ENSP00000245414,9606.ENSP00000263642,9606.ENSP00000333657,9606.ENSP00000357113,9606.ENSP00000360869,9606.ENSP00000368699,9606.ENSP00000369213,9606.ENSP00000380697,9606.ENSP00000381601,9606.ENSP00000395590,9606.ENSP00000483430,9606.ENSP00000484689	OAS3,IRF1,IFIH1,MX2,IFI16,IFIT1,ISG15,DDX58,IRF7,MX1,IFI35,IFI27,IFITM2
CL:19391	Interferon alpha/beta signaling, and ISG15-protein conjugation	10	36	1.76	1.25e-08	9606.ENSP00000228928,9606.ENSP00000245414,9606.ENSP00000333657,9606.ENSP00000360869,9606.ENSP00000368699,9606.ENSP00000380697,9606.ENSP00000381601,9606.ENSP00000395590,9606.ENSP00000483430,9606.ENSP00000484689	OAS3,IRF1,MX2,IFIT1,ISG15,IRF7,MX1,IFI35,IFI27,IFITM2
CL:19394	Interferon alpha/beta signaling	9	21	1.95	1.25e-08	9606.ENSP00000228928,9606.ENSP00000245414,9606.ENSP00000333657,9606.ENSP00000360869,9606.ENSP00000380697,9606.ENSP00000381601,9606.ENSP00000395590,9606.ENSP00000483430,9606.ENSP00000484689	OAS3,IRF1,MX2,IFIT1,IRF7,MX1,IFI35,IFI27,IFITM2
CL:18848	mixed, incl. Immunoregulatory interactions between a Lymphoid and a non-Lymphoid cell, and AIG1-type guanine nucleotide-binding (G) domain	11	120	1.28	2.22e-05	9606.ENSP00000252593,9606.ENSP00000263645,9606.ENSP00000271324,9606.ENSP00000271450,9606.ENSP00000341141,9606.ENSP00000344115,9606.ENSP00000357981,9606.ENSP00000386187,9606.ENSP00000418525,9606.ENSP00000457421,9606.ENSP00000469613	BST2,CD81,CD53,FCGR2A,SIGLEC1,CDH5,CTSS,IFITM1,MME,PECAM1,FLT3LG
CL:19314	MHC II	6	10	2.09	4.53e-05	9606.ENSP00000009530,9606.ENSP00000363976,9606.ENSP00000378786,9606.ENSP00000393566,9606.ENSP00000398890,9606.ENSP00000408146	CD74,HLA-DMA,HLA-DRA,HLA-DPA1,HLA-DMB,HLA-DPB1
CL:18980	mixed, incl. Hematopoietic cell lineage, and sialic acid binding	8	54	1.48	0.00029	9606.ENSP00000252593,9606.ENSP00000263645,9606.ENSP00000341141,9606.ENSP00000344115,9606.ENSP00000386187,9606.ENSP00000418525,9606.ENSP00000457421,9606.ENSP00000469613	BST2,CD81,SIGLEC1,CDH5,IFITM1,MME,PECAM1,FLT3LG
CL:19397	Microphthalmia with limb anomalies, and Interferon alpha/beta signaling	6	16	1.89	0.00034	9606.ENSP00000228928,9606.ENSP00000333657,9606.ENSP00000360869,9606.ENSP00000380697,9606.ENSP00000381601,9606.ENSP00000395590	OAS3,MX2,IFIT1,IRF7,MX1,IFI35
CL:19992	Classical antibody-mediated complement activation	5	6	2.23	0.00043	9606.ENSP00000278407,9606.ENSP00000313967,9606.ENSP00000363773,9606.ENSP00000385035,9606.ENSP00000438615	SERPING1,C1QB,C1QA,C1S,C1R
CL:18006	Immune response to tuberculosis, and interleukin-6 receptor complex	6	19	1.81	0.00062	9606.ENSP00000315768,9606.ENSP00000343204,9606.ENSP00000343957,9606.ENSP00000354394,9606.ENSP00000356713,9606.ENSP00000370698	STAT2,JAK1,IFNAR2,STAT1,IFNGR1,IL6ST
CL:19968	Complement cascade	6	37	1.52	0.0147	9606.ENSP00000245907,9606.ENSP00000278407,9606.ENSP00000313967,9606.ENSP00000363773,9606.ENSP00000385035,9606.ENSP00000438615	C3,SERPING1,C1QB,C1QA,C1S,C1R
CL:19317	MHC class II protein complex assembly	4	5	2.22	0.0154	9606.ENSP00000009530,9606.ENSP00000363976,9606.ENSP00000378786,9606.ENSP00000398890	CD74,HLA-DMA,HLA-DRA,HLA-DMB
CL:16870	Integrin domain superfamily, and hematopoietic stem cell migration to bone marrow	5	18	1.76	0.0173	9606.ENSP00000264832,9606.ENSP00000346839,9606.ENSP00000349252,9606.ENSP00000379350,9606.ENSP00000380948	ICAM1,FN1,ITGAL,ITGB1,ITGB2
CL:19092	mixed, incl. TAP binding, and MHC class I protein complex binding	5	18	1.76	0.0173	9606.ENSP00000364034,9606.ENSP00000365817,9606.ENSP00000379873,9606.ENSP00000399168,9606.ENSP00000404833	TAP2,HLA-E,HLA-A,HLA-B,TAPBP
Analysis Overlapping all LN Class. Input 52. 5 Clusters	term description	observed gene count	background gene count	strength	false discovery rate	matching proteins in your network (IDs)	matching proteins in your network (labels)
CL:19385	Interferon alpha/beta signaling, and Negative regulators of DDX58/IFIH1 signaling	11	61	1.98	2.85e-12	9606.ENSP00000228928,9606.ENSP00000263642,9606.ENSP00000333657,9606.ENSP00000357113,9606.ENSP00000360869,9606.ENSP00000368699,9606.ENSP00000369213,9606.ENSP00000380697,9606.ENSP00000381601,9606.ENSP00000395590,9606.ENSP00000483430	OAS3,IFIH1,MX2,IFI16,IFIT1,ISG15,DDX58,IRF7,MX1,IFI35,IFI27
CL:19391	Interferon alpha/beta signaling, and ISG15-protein conjugation	8	36	2.07	1.18e-08	9606.ENSP00000228928,9606.ENSP00000333657,9606.ENSP00000360869,9606.ENSP00000368699,9606.ENSP00000380697,9606.ENSP00000381601,9606.ENSP00000395590,9606.ENSP00000483430	OAS3,MX2,IFIT1,ISG15,IRF7,MX1,IFI35,IFI27
CL:19394	Interferon alpha/beta signaling	7	21	2.25	3.75e-08	9606.ENSP00000228928,9606.ENSP00000333657,9606.ENSP00000360869,9606.ENSP00000380697,9606.ENSP00000381601,9606.ENSP00000395590,9606.ENSP00000483430	OAS3,MX2,IFIT1,IRF7,MX1,IFI35,IFI27
CL:19397	Microphthalmia with limb anomalies, and Interferon alpha/beta signaling	6	16	2.3	1.31e-06	9606.ENSP00000228928,9606.ENSP00000333657,9606.ENSP00000360869,9606.ENSP00000380697,9606.ENSP00000381601,9606.ENSP00000395590	OAS3,MX2,IFIT1,IRF7,MX1,IFI35
CL:19399	mixed, incl. 2-5-oligoadenylate synthetase activity, and Nephropathia epidemica	4	11	2.28	0.0078	9606.ENSP00000228928,9606.ENSP00000333657,9606.ENSP00000360869,9606.ENSP00000395590	OAS3,MX2,IFIT1,IFI35
Analysis LN4 only. Input 105. 9 Clusters	term description	observed gene count	background gene count	strength	false discovery rate	matching proteins in your network (IDs)	matching proteins in your network (labels)
CL:18486	mixed, incl. Apoptosis modulation and signaling, and NF-kappa B signaling pathway	31	173	1.52	2.94e-30	9606.ENSP00000162749,9606.ENSP00000220751,9606.ENSP00000222823,9606.ENSP00000228918,9606.ENSP00000241261,9606.ENSP00000247668,9606.ENSP00000248244,9606.ENSP00000260010,9606.ENSP00000276431,9606.ENSP00000293288,9606.ENSP00000296795,9606.ENSP00000301838,9606.ENSP00000311032,9606.ENSP00000326737,9606.ENSP00000343505,9606.ENSP00000351273,9606.ENSP00000351908,9606.ENSP00000354932,9606.ENSP00000358022,…	TNFRSF1A,RIPK2,NOD1,LTBR,TNFSF10,TRAF2,TICAM1,TLR2,TNFRSF10B,BAX,TLR3,FADD,CASP3,TNFRSF12A,TNFSF13,CASP8,MAP3K5,TLR1,MCL1,MAP3K7,NFKB2,BCL10,TNFRSF1B,TANK,IL1R1,MYD88,IKBKB,CASP1,TRAF3,TNFAIP3,IKBKG
CL:18487	mixed, incl. NF-kappa B signaling pathway, and CARD domain	24	126	1.55	6.42e-23	9606.ENSP00000162749,9606.ENSP00000220751,9606.ENSP00000222823,9606.ENSP00000228918,9606.ENSP00000247668,9606.ENSP00000248244,9606.ENSP00000260010,9606.ENSP00000296795,9606.ENSP00000326737,9606.ENSP00000343505,9606.ENSP00000351908,9606.ENSP00000354932,9606.ENSP00000358335,9606.ENSP00000358983,9606.ENSP00000359612,9606.ENSP00000365435,9606.ENSP00000376505,9606.ENSP00000386380,9606.ENSP00000401399,…	TNFRSF1A,RIPK2,NOD1,LTBR,TRAF2,TICAM1,TLR2,TLR3,TNFRSF12A,TNFSF13,MAP3K5,TLR1,MAP3K7,NFKB2,BCL10,TNFRSF1B,TANK,IL1R1,MYD88,IKBKB,CASP1,TRAF3,TNFAIP3,IKBKG
CL:18488	mixed, incl. NF-kappa B signaling pathway, and TIR domain	21	98	1.6	2.11e-20	9606.ENSP00000162749,9606.ENSP00000228918,9606.ENSP00000247668,9606.ENSP00000248244,9606.ENSP00000260010,9606.ENSP00000296795,9606.ENSP00000326737,9606.ENSP00000343505,9606.ENSP00000351908,9606.ENSP00000354932,9606.ENSP00000358335,9606.ENSP00000358983,9606.ENSP00000359612,9606.ENSP00000365435,9606.ENSP00000376505,9606.ENSP00000386380,9606.ENSP00000401399,9606.ENSP00000430684,9606.ENSP00000454207,…	TNFRSF1A,LTBR,TRAF2,TICAM1,TLR2,TLR3,TNFRSF12A,TNFSF13,MAP3K5,TLR1,MAP3K7,NFKB2,BCL10,TNFRSF1B,TANK,IL1R1,MYD88,IKBKB,TRAF3,TNFAIP3,IKBKG
CL:18490	NF-kappa B signaling pathway, and TIR domain	20	85	1.64	5.58e-20	9606.ENSP00000162749,9606.ENSP00000228918,9606.ENSP00000247668,9606.ENSP00000248244,9606.ENSP00000260010,9606.ENSP00000296795,9606.ENSP00000326737,9606.ENSP00000343505,9606.ENSP00000351908,9606.ENSP00000354932,9606.ENSP00000358335,9606.ENSP00000358983,9606.ENSP00000365435,9606.ENSP00000376505,9606.ENSP00000386380,9606.ENSP00000401399,9606.ENSP00000430684,9606.ENSP00000454207,9606.ENSP00000481570,…	TNFRSF1A,LTBR,TRAF2,TICAM1,TLR2,TLR3,TNFRSF12A,TNFSF13,MAP3K5,TLR1,MAP3K7,NFKB2,TNFRSF1B,TANK,IL1R1,MYD88,IKBKB,TRAF3,TNFAIP3,IKBKG
CL:18491	NF-kappa B signaling pathway, and TIR domain	19	80	1.65	7.35e-19	9606.ENSP00000162749,9606.ENSP00000228918,9606.ENSP00000247668,9606.ENSP00000248244,9606.ENSP00000260010,9606.ENSP00000296795,9606.ENSP00000326737,9606.ENSP00000343505,9606.ENSP00000351908,9606.ENSP00000354932,9606.ENSP00000358335,9606.ENSP00000358983,9606.ENSP00000365435,9606.ENSP00000376505,9606.ENSP00000386380,9606.ENSP00000401399,9606.ENSP00000430684,9606.ENSP00000454207,9606.ENSP00000483825	TNFRSF1A,LTBR,TRAF2,TICAM1,TLR2,TLR3,TNFRSF12A,TNFSF13,MAP3K5,TLR1,MAP3K7,NFKB2,TNFRSF1B,TANK,IL1R1,MYD88,IKBKB,TRAF3,IKBKG
CL:18492	I-kappaB kinase/NF-kappaB signaling, and interleukin-1 receptor binding	15	65	1.63	1e-13	9606.ENSP00000162749,9606.ENSP00000247668,9606.ENSP00000248244,9606.ENSP00000260010,9606.ENSP00000296795,9606.ENSP00000351908,9606.ENSP00000354932,9606.ENSP00000358335,9606.ENSP00000358983,9606.ENSP00000365435,9606.ENSP00000376505,9606.ENSP00000386380,9606.ENSP00000401399,9606.ENSP00000430684,9606.ENSP00000483825	TNFRSF1A,TRAF2,TICAM1,TLR2,TLR3,MAP3K5,TLR1,MAP3K7,NFKB2,TNFRSF1B,TANK,IL1R1,MYD88,IKBKB,IKBKG
CL:18493	I-kappaB kinase/NF-kappaB signaling, and TNF receptor-associated factor TRAF	11	40	1.71	1.42e-09	9606.ENSP00000162749,9606.ENSP00000247668,9606.ENSP00000248244,9606.ENSP00000296795,9606.ENSP00000351908,9606.ENSP00000358335,9606.ENSP00000358983,9606.ENSP00000365435,9606.ENSP00000376505,9606.ENSP00000430684,9606.ENSP00000483825	TNFRSF1A,TRAF2,TICAM1,TLR3,MAP3K5,MAP3K7,NFKB2,TNFRSF1B,TANK,IKBKB,IKBKG
CL:18494	TNFR1-induced NFkappaB signaling pathway, and negative regulation of MyD88-independent toll-like receptor signaling pathway	9	25	1.83	6.31e-08	9606.ENSP00000162749,9606.ENSP00000247668,9606.ENSP00000248244,9606.ENSP00000296795,9606.ENSP00000351908,9606.ENSP00000358335,9606.ENSP00000365435,9606.ENSP00000376505,9606.ENSP00000483825	TNFRSF1A,TRAF2,TICAM1,TLR3,MAP3K5,MAP3K7,TNFRSF1B,TANK,IKBKG
CL:18741	Nanomaterial induced apoptosis, and TRAIL binding	7	37	1.55	0.0016	9606.ENSP00000241261,9606.ENSP00000276431,9606.ENSP00000293288,9606.ENSP00000301838,9606.ENSP00000311032,9606.ENSP00000351273,9606.ENSP00000358022	TNFSF10,TNFRSF10B,BAX,FADD,CASP3,CASP8,MCL1
Analysis higher LN4 v LN5. Input 166. 28 Clusters	term description	observed gene count	background gene count	strength	false discovery rate	matching proteins in your network (IDs)	matching proteins in your network (labels)
CL:18486	mixed, incl. Apoptosis modulation and signaling, and NF-kappa B signaling pathway	29	173	1.3	7.49e-21	9606.ENSP00000162749,9606.ENSP00000216797,9606.ENSP00000220751,9606.ENSP00000221452,9606.ENSP00000241261,9606.ENSP00000260010,9606.ENSP00000276431,9606.ENSP00000284818,9606.ENSP00000293288,9606.ENSP00000301838,9606.ENSP00000304236,9606.ENSP00000311032,9606.ENSP00000326737,9606.ENSP00000351273,9606.ENSP00000351908,9606.ENSP00000354932,9606.ENSP00000358022,9606.ENSP00000358335,9606.ENSP00000358983,…	TNFRSF1A,NFKBIA,RIPK2,RELB,TNFSF10,TLR2,TNFRSF10B,LY96,BAX,FADD,CD14,CASP3,TNFRSF12A,CASP8,MAP3K5,TLR1,MCL1,MAP3K7,NFKB2,BCL10,CD40,TLR4,TANK,IL1R1,MYD88,LTB,CASP1,TRAF3,TNFAIP3
CL:18487	mixed, incl. NF-kappa B signaling pathway, and CARD domain	22	126	1.31	3.39e-15	9606.ENSP00000162749,9606.ENSP00000216797,9606.ENSP00000220751,9606.ENSP00000221452,9606.ENSP00000260010,9606.ENSP00000284818,9606.ENSP00000304236,9606.ENSP00000326737,9606.ENSP00000351908,9606.ENSP00000354932,9606.ENSP00000358335,9606.ENSP00000358983,9606.ENSP00000359612,9606.ENSP00000361359,9606.ENSP00000363089,9606.ENSP00000376505,9606.ENSP00000386380,9606.ENSP00000401399,9606.ENSP00000410481,…	TNFRSF1A,NFKBIA,RIPK2,RELB,TLR2,LY96,CD14,TNFRSF12A,MAP3K5,TLR1,MAP3K7,NFKB2,BCL10,CD40,TLR4,TANK,IL1R1,MYD88,LTB,CASP1,TRAF3,TNFAIP3
CL:18488	mixed, incl. NF-kappa B signaling pathway, and TIR domain	20	98	1.38	1.2e-14	9606.ENSP00000162749,9606.ENSP00000216797,9606.ENSP00000221452,9606.ENSP00000260010,9606.ENSP00000284818,9606.ENSP00000304236,9606.ENSP00000326737,9606.ENSP00000351908,9606.ENSP00000354932,9606.ENSP00000358335,9606.ENSP00000358983,9606.ENSP00000359612,9606.ENSP00000361359,9606.ENSP00000363089,9606.ENSP00000376505,9606.ENSP00000386380,9606.ENSP00000401399,9606.ENSP00000410481,9606.ENSP00000454207,…	TNFRSF1A,NFKBIA,RELB,TLR2,LY96,CD14,TNFRSF12A,MAP3K5,TLR1,MAP3K7,NFKB2,BCL10,CD40,TLR4,TANK,IL1R1,MYD88,LTB,TRAF3,TNFAIP3
CL:18490	NF-kappa B signaling pathway, and TIR domain	19	85	1.42	2.08e-14	9606.ENSP00000162749,9606.ENSP00000216797,9606.ENSP00000221452,9606.ENSP00000260010,9606.ENSP00000284818,9606.ENSP00000304236,9606.ENSP00000326737,9606.ENSP00000351908,9606.ENSP00000354932,9606.ENSP00000358335,9606.ENSP00000358983,9606.ENSP00000361359,9606.ENSP00000363089,9606.ENSP00000376505,9606.ENSP00000386380,9606.ENSP00000401399,9606.ENSP00000410481,9606.ENSP00000454207,9606.ENSP00000481570	TNFRSF1A,NFKBIA,RELB,TLR2,LY96,CD14,TNFRSF12A,MAP3K5,TLR1,MAP3K7,NFKB2,CD40,TLR4,TANK,IL1R1,MYD88,LTB,TRAF3,TNFAIP3
CL:18491	NF-kappa B signaling pathway, and TIR domain	18	80	1.42	1.63e-13	9606.ENSP00000162749,9606.ENSP00000216797,9606.ENSP00000221452,9606.ENSP00000260010,9606.ENSP00000284818,9606.ENSP00000304236,9606.ENSP00000326737,9606.ENSP00000351908,9606.ENSP00000354932,9606.ENSP00000358335,9606.ENSP00000358983,9606.ENSP00000361359,9606.ENSP00000363089,9606.ENSP00000376505,9606.ENSP00000386380,9606.ENSP00000401399,9606.ENSP00000410481,9606.ENSP00000454207	TNFRSF1A,NFKBIA,RELB,TLR2,LY96,CD14,TNFRSF12A,MAP3K5,TLR1,MAP3K7,NFKB2,CD40,TLR4,TANK,IL1R1,MYD88,LTB,TRAF3
CL:18492	I-kappaB kinase/NF-kappaB signaling, and interleukin-1 receptor binding	14	65	1.4	2.76e-09	9606.ENSP00000162749,9606.ENSP00000216797,9606.ENSP00000221452,9606.ENSP00000260010,9606.ENSP00000284818,9606.ENSP00000304236,9606.ENSP00000351908,9606.ENSP00000354932,9606.ENSP00000358335,9606.ENSP00000358983,9606.ENSP00000363089,9606.ENSP00000376505,9606.ENSP00000386380,9606.ENSP00000401399	TNFRSF1A,NFKBIA,RELB,TLR2,LY96,CD14,MAP3K5,TLR1,MAP3K7,NFKB2,TLR4,TANK,IL1R1,MYD88
CL:19385	Interferon alpha/beta signaling, and Negative regulators of DDX58/IFIH1 signaling	12	61	1.37	6.05e-07	9606.ENSP00000228928,9606.ENSP00000263642,9606.ENSP00000306565,9606.ENSP00000333657,9606.ENSP00000357113,9606.ENSP00000360891,9606.ENSP00000368699,9606.ENSP00000369213,9606.ENSP00000380697,9606.ENSP00000381601,9606.ENSP00000464030,9606.ENSP00000484689	OAS3,IFIH1,ISG20,MX2,IFI16,IFIT2,ISG15,DDX58,IRF7,MX1,IKBKE,IFITM2
CL:16868	Integrin domain superfamily, and hematopoietic stem cell migration to bone marrow	9	25	1.63	3.3e-06	9606.ENSP00000264832,9606.ENSP00000293379,9606.ENSP00000294728,9606.ENSP00000346839,9606.ENSP00000349252,9606.ENSP00000380948,9606.ENSP00000441691,9606.ENSP00000452786,9606.ENSP00000454623	ICAM1,ITGA5,VCAM1,FN1,ITGAL,ITGB2,ITGAM,ITGB3,ITGAX
CL:16870	Integrin domain superfamily, and hematopoietic stem cell migration to bone marrow	8	18	1.72	1.09e-05	9606.ENSP00000264832,9606.ENSP00000293379,9606.ENSP00000294728,9606.ENSP00000346839,9606.ENSP00000349252,9606.ENSP00000380948,9606.ENSP00000441691,9606.ENSP00000454623	ICAM1,ITGA5,VCAM1,FN1,ITGAL,ITGB2,ITGAM,ITGAX
CL:17997	JAK-STAT signaling pathway	13	122	1.1	4.13e-05	9606.ENSP00000227752,9606.ENSP00000233954,9606.ENSP00000315768,9606.ENSP00000343204,9606.ENSP00000343957,9606.ENSP00000354394,9606.ENSP00000356713,9606.ENSP00000360730,9606.ENSP00000363318,9606.ENSP00000371067,9606.ENSP00000380421,9606.ENSP00000384053,9606.ENSP00000391676	IL10RA,IL1RL1,STAT2,JAK1,IFNAR2,STAT1,IFNGR1,IL13RA1,IL2RG,JAK2,IL15RA,CSF2RB,JAK3
CL:18000	JAK-STAT signaling pathway	12	97	1.16	4.24e-05	9606.ENSP00000227752,9606.ENSP00000315768,9606.ENSP00000343204,9606.ENSP00000343957,9606.ENSP00000354394,9606.ENSP00000356713,9606.ENSP00000360730,9606.ENSP00000363318,9606.ENSP00000371067,9606.ENSP00000380421,9606.ENSP00000384053,9606.ENSP00000391676	IL10RA,STAT2,JAK1,IFNAR2,STAT1,IFNGR1,IL13RA1,IL2RG,JAK2,IL15RA,CSF2RB,JAK3
CL:19087	mixed, incl. Immunoregulatory interactions between a Lymphoid and a non-Lymphoid cell, and TNFs bind their physiological receptors	12	112	1.1	0.00016	9606.ENSP00000300134,9606.ENSP00000302569,9606.ENSP00000312002,9606.ENSP00000312367,9606.ENSP00000320084,9606.ENSP00000364034,9606.ENSP00000365817,9606.ENSP00000379873,9606.ENSP00000398568,9606.ENSP00000399168,9606.ENSP00000404833,9606.ENSP00000484431	STAT6,CLEC7A,HAVCR2,CD84,CD276,TAP2,HLA-E,HLA-A,PRF1,HLA-B,TAPBP,CD48
CL:19394	Interferon alpha/beta signaling	7	21	1.59	0.00069	9606.ENSP00000228928,9606.ENSP00000306565,9606.ENSP00000333657,9606.ENSP00000360891,9606.ENSP00000380697,9606.ENSP00000381601,9606.ENSP00000484689	OAS3,ISG20,MX2,IFIT2,IRF7,MX1,IFITM2
CL:19391	Interferon alpha/beta signaling, and ISG15-protein conjugation	8	36	1.42	0.00071	9606.ENSP00000228928,9606.ENSP00000306565,9606.ENSP00000333657,9606.ENSP00000360891,9606.ENSP00000368699,9606.ENSP00000380697,9606.ENSP00000381601,9606.ENSP00000484689	OAS3,ISG20,MX2,IFIT2,ISG15,IRF7,MX1,IFITM2
CL:19968	Complement cascade	8	37	1.41	0.00081	9606.ENSP00000245907,9606.ENSP00000278407,9606.ENSP00000302079,9606.ENSP00000313967,9606.ENSP00000363773,9606.ENSP00000385035,9606.ENSP00000416561,9606.ENSP00000438615	C3,SERPING1,C3AR1,C1QB,C1QA,C1S,CFB,C1R
CL:18573	IRAK4 deficiency (TLR2/4), and interleukin-1 receptor binding	7	23	1.55	0.00096	9606.ENSP00000260010,9606.ENSP00000284818,9606.ENSP00000304236,9606.ENSP00000354932,9606.ENSP00000363089,9606.ENSP00000386380,9606.ENSP00000401399	TLR2,LY96,CD14,TLR1,TLR4,IL1R1,MYD88
CL:16891	integrin alphaL-beta2 complex, and response to sulfur dioxide	5	5	2.07	0.0019	9606.ENSP00000264832,9606.ENSP00000349252,9606.ENSP00000380948,9606.ENSP00000441691,9606.ENSP00000454623	ICAM1,ITGAL,ITGB2,ITGAM,ITGAX
CL:18848	mixed, incl. Immunoregulatory interactions between a Lymphoid and a non-Lymphoid cell, and AIG1-type guanine nucleotide-binding (G) domain	11	120	1.03	0.0027	9606.ENSP00000228463,9606.ENSP00000271324,9606.ENSP00000271450,9606.ENSP00000305988,9606.ENSP00000315997,9606.ENSP00000341141,9606.ENSP00000356946,9606.ENSP00000357981,9606.ENSP00000386187,9606.ENSP00000444986,9606.ENSP00000483985	SELPLG,CD53,FCGR2A,ALCAM,LILRB1,SIGLEC1,FCGR3A,CTSS,IFITM1,HCK,CD24
CL:19992	Classical antibody-mediated complement activation	5	6	1.99	0.0031	9606.ENSP00000278407,9606.ENSP00000313967,9606.ENSP00000363773,9606.ENSP00000385035,9606.ENSP00000438615	SERPING1,C1QB,C1QA,C1S,C1R
CL:19397	Microphthalmia with limb anomalies, and Interferon alpha/beta signaling	6	16	1.65	0.0036	9606.ENSP00000228928,9606.ENSP00000306565,9606.ENSP00000333657,9606.ENSP00000360891,9606.ENSP00000380697,9606.ENSP00000381601	OAS3,ISG20,MX2,IFIT2,IRF7,MX1
CL:19310	mixed, incl. MHC class II protein complex, and MHC class II deficiency	7	33	1.4	0.0059	9606.ENSP00000009530,9606.ENSP00000227266,9606.ENSP00000262510,9606.ENSP00000363976,9606.ENSP00000378786,9606.ENSP00000393566,9606.ENSP00000398890	CD74,CTSC,NLRC5,HLA-DMA,HLA-DRA,HLA-DPA1,HLA-DMB
CL:19088	mixed, incl. Immunoregulatory interactions between a Lymphoid and a non-Lymphoid cell, and natural killer cell mediated immunity	9	79	1.13	0.0081	9606.ENSP00000300134,9606.ENSP00000312367,9606.ENSP00000364034,9606.ENSP00000365817,9606.ENSP00000379873,9606.ENSP00000398568,9606.ENSP00000399168,9606.ENSP00000404833,9606.ENSP00000484431	STAT6,CD84,TAP2,HLA-E,HLA-A,PRF1,HLA-B,TAPBP,CD48
CL:18741	Nanomaterial induced apoptosis, and TRAIL binding	7	37	1.35	0.0108	9606.ENSP00000241261,9606.ENSP00000276431,9606.ENSP00000293288,9606.ENSP00000301838,9606.ENSP00000311032,9606.ENSP00000351273,9606.ENSP00000358022	TNFSF10,TNFRSF10B,BAX,FADD,CASP3,CASP8,MCL1
CL:19970	Initial triggering of complement, and Complement component 3 deficiency	6	21	1.53	0.0112	9606.ENSP00000278407,9606.ENSP00000302079,9606.ENSP00000313967,9606.ENSP00000363773,9606.ENSP00000385035,9606.ENSP00000438615	SERPING1,C3AR1,C1QB,C1QA,C1S,C1R
CL:19314	MHC II	5	10	1.77	0.0147	9606.ENSP00000009530,9606.ENSP00000363976,9606.ENSP00000378786,9606.ENSP00000393566,9606.ENSP00000398890	CD74,HLA-DMA,HLA-DRA,HLA-DPA1,HLA-DMB
CL:18493	I-kappaB kinase/NF-kappaB signaling, and TNF receptor-associated factor TRAF	7	40	1.31	0.016	9606.ENSP00000162749,9606.ENSP00000216797,9606.ENSP00000221452,9606.ENSP00000351908,9606.ENSP00000358335,9606.ENSP00000358983,9606.ENSP00000376505	TNFRSF1A,NFKBIA,RELB,MAP3K5,MAP3K7,NFKB2,TANK
CL:19705	mixed, incl. Complement and coagulation cascades, and lipoprotein particle	12	189	0.87	0.0169	9606.ENSP00000245907,9606.ENSP00000262101,9606.ENSP00000264870,9606.ENSP00000278407,9606.ENSP00000302079,9606.ENSP00000313967,9606.ENSP00000317674,9606.ENSP00000363773,9606.ENSP00000385035,9606.ENSP00000416561,9606.ENSP00000432218,9606.ENSP00000438615	C3,MSR1,F13A1,SERPING1,C3AR1,C1QB,APOL1,C1QA,C1S,CFB,IL32,C1R
CL:19311	mixed, incl. MHC class II protein complex, and Torsin 1/2	6	27	1.42	0.0345	9606.ENSP00000009530,9606.ENSP00000227266,9606.ENSP00000363976,9606.ENSP00000378786,9606.ENSP00000393566,9606.ENSP00000398890	CD74,CTSC,HLA-DMA,HLA-DRA,HLA-DPA1,HLA-DMB

## Sheet: S5_Data_Figure_1B
GO Biological Function: Analysis LN v TBM. Input 171 #term ID	term description	observed gene count	background gene count	strength	false discovery rate	matching proteins in your network (IDs)	matching proteins in your network (labels)
GO:0002376	immune system process	142	2481	0.82	4.26e-92	9606.ENSP00000009530,9606.ENSP00000011653,9606.ENSP00000221930,9606.ENSP00000225698,9606.ENSP00000225831,9606.ENSP00000228918,9606.ENSP00000228928,9606.ENSP00000241261,9606.ENSP00000242786,9606.ENSP00000243077,9606.ENSP00000245414,9606.ENSP00000245907,9606.ENSP00000248244,9606.ENSP00000250092,9606.ENSP00000252593,9606.ENSP00000259607,9606.ENSP00000260010,9606.ENSP00000261799,9606.ENSP00000262510,…	CD74,CD4,TGFB1,C1QBP,CCL2,LTBR,OAS3,TNFSF10,CD97,LRP1,IRF1,C3,TICAM1,CD68,BST2,CCL21,TLR2,PDGFRB,NLRC5,IFIH1,CKLF,STAT3,ICAM1,TP53,IFNAR1,ECSIT,CD53,FCGR2A,SERPING1,THY1,FCER1G,BAX,ITGA5,CXCL16,VCAM1,MERTK,CCR1,IL15,STAT6,AXL,C3AR1,IL16,CD14,CEBPB,CD164,CMKLR1,CD84,C1QB,STAT2,APOL1,CD276,C7,RORC,MX2,JAK1,TNFSF13,IFNAR2,TAP1,ATG7,FYN,FN1,ITGAL,CASP8,PSMB10,PIK3CG,TFRC,DPP4,STAT1,SBNO2,TLR1,CD47,IF…
GO:0006955	immune response	120	1588	0.94	2.76e-84	9606.ENSP00000009530,9606.ENSP00000011653,9606.ENSP00000225698,9606.ENSP00000225831,9606.ENSP00000228918,9606.ENSP00000228928,9606.ENSP00000241261,9606.ENSP00000242786,9606.ENSP00000243077,9606.ENSP00000245414,9606.ENSP00000245907,9606.ENSP00000248244,9606.ENSP00000250092,9606.ENSP00000252593,9606.ENSP00000259607,9606.ENSP00000260010,9606.ENSP00000262510,9606.ENSP00000263642,9606.ENSP00000264657,…	CD74,CD4,C1QBP,CCL2,LTBR,OAS3,TNFSF10,CD97,LRP1,IRF1,C3,TICAM1,CD68,BST2,CCL21,TLR2,NLRC5,IFIH1,STAT3,ICAM1,TP53,IFNAR1,ECSIT,CD53,FCGR2A,SERPING1,FCER1G,CXCL16,VCAM1,CCR1,IL15,STAT6,AXL,C3AR1,IL16,CD14,CEBPB,CD164,CMKLR1,CD84,C1QB,STAT2,APOL1,C7,RORC,MX2,JAK1,TNFSF13,IFNAR2,TAP1,ATG7,FYN,ITGAL,PSMB10,PIK3CG,STAT1,SBNO2,TLR1,CD47,IFNGR1,FCGR3A,IFI16,CTSS,NFKB2,BCL10,IFIT1,IFIT2,CD40,TLR4,IL2RG,C1…
GO:0006952	defense response	108	1296	0.98	2.89e-77	9606.ENSP00000009530,9606.ENSP00000011653,9606.ENSP00000162749,9606.ENSP00000221930,9606.ENSP00000223095,9606.ENSP00000225698,9606.ENSP00000225831,9606.ENSP00000228928,9606.ENSP00000242786,9606.ENSP00000243077,9606.ENSP00000245414,9606.ENSP00000245907,9606.ENSP00000248244,9606.ENSP00000250092,9606.ENSP00000252593,9606.ENSP00000259607,9606.ENSP00000260010,9606.ENSP00000262510,9606.ENSP00000263642,…	CD74,CD4,TNFRSF1A,TGFB1,SERPINE1,C1QBP,CCL2,OAS3,CD97,LRP1,IRF1,C3,TICAM1,CD68,BST2,CCL21,TLR2,NLRC5,IFIH1,STAT3,ICAM1,TP53,IFNAR1,ECSIT,SERPING1,FCER1G,CXCL16,VCAM1,CCR1,IL15,STAT6,AXL,C3AR1,CD14,CEBPB,FOS,CMKLR1,CD84,C1QB,STAT2,APOL1,C7,MX2,SIGLEC1,JAK1,IFNAR2,TAP1,ATG7,FN1,ITGAL,CD163,PIK3CG,DPP4,STAT1,TLR1,CD47,IFNGR1,IFI16,NFKB2,BCL10,IFIT1,IFIT2,CD40,TLR4,C1QA,PSMB8,HLA-C,TNFRSF1B,HLA-E,ANX…
GO:0034097	response to cytokine	103	1101	1.03	2.89e-77	9606.ENSP00000009530,9606.ENSP00000011653,9606.ENSP00000162749,9606.ENSP00000216797,9606.ENSP00000221930,9606.ENSP00000225831,9606.ENSP00000227752,9606.ENSP00000228918,9606.ENSP00000228928,9606.ENSP00000245414,9606.ENSP00000247668,9606.ENSP00000252593,9606.ENSP00000259607,9606.ENSP00000260010,9606.ENSP00000264657,9606.ENSP00000264832,9606.ENSP00000264870,9606.ENSP00000269305,9606.ENSP00000270139,…	CD74,CD4,TNFRSF1A,NFKBIA,TGFB1,CCL2,IL10RA,LTBR,OAS3,IRF1,TRAF2,BST2,CCL21,TLR2,STAT3,ICAM1,F13A1,TP53,IFNAR1,FCER1G,CXCL16,VCAM1,CCR1,IL15,STAT6,AXL,IL16,CD14,COL3A1,CEBPB,FOS,CMKLR1,STAT2,RORC,MX2,JAK1,TNFSF13,IFNAR2,FYN,FN1,CASP8,PSMB10,TFRC,STAT1,SBNO2,CD47,IFNGR1,IFI16,MCL1,MAP3K7,NFKB2,IL13RA1,IFIT1,IFIT2,CD40,TLR4,IL2RG,KLF4,PSMB9,PSMB8,HLA-C,TNFRSF1B,HLA-E,ANXA1,PIK3CD,ISG15,IL6ST,JAK2,TA…
GO:0071345	cellular response to cytokine stimulus	98	1013	1.05	5.45e-74	9606.ENSP00000009530,9606.ENSP00000011653,9606.ENSP00000162749,9606.ENSP00000216797,9606.ENSP00000221930,9606.ENSP00000225831,9606.ENSP00000227752,9606.ENSP00000228918,9606.ENSP00000228928,9606.ENSP00000245414,9606.ENSP00000247668,9606.ENSP00000252593,9606.ENSP00000259607,9606.ENSP00000260010,9606.ENSP00000264657,9606.ENSP00000264832,9606.ENSP00000264870,9606.ENSP00000269305,9606.ENSP00000270139,…	CD74,CD4,TNFRSF1A,NFKBIA,TGFB1,CCL2,IL10RA,LTBR,OAS3,IRF1,TRAF2,BST2,CCL21,TLR2,STAT3,ICAM1,F13A1,TP53,IFNAR1,FCER1G,VCAM1,CCR1,IL15,STAT6,AXL,IL16,CEBPB,FOS,CMKLR1,STAT2,RORC,MX2,JAK1,TNFSF13,IFNAR2,FYN,FN1,PSMB10,TFRC,STAT1,SBNO2,CD47,IFNGR1,IFI16,MCL1,MAP3K7,IL13RA1,IFIT1,IFIT2,CD40,TLR4,IL2RG,KLF4,PSMB9,PSMB8,HLA-C,TNFRSF1B,HLA-E,ANXA1,PIK3CD,ISG15,IL6ST,JAK2,TANK,IRF2,HLA-DRA,HLA-A,IL15RA,IR…
GO:0019221	cytokine-mediated signaling pathway	86	678	1.16	4.24e-72	9606.ENSP00000009530,9606.ENSP00000011653,9606.ENSP00000162749,9606.ENSP00000216797,9606.ENSP00000221930,9606.ENSP00000225831,9606.ENSP00000227752,9606.ENSP00000228918,9606.ENSP00000228928,9606.ENSP00000245414,9606.ENSP00000247668,9606.ENSP00000252593,9606.ENSP00000259607,9606.ENSP00000264657,9606.ENSP00000264832,9606.ENSP00000264870,9606.ENSP00000269305,9606.ENSP00000270139,9606.ENSP00000289902,…	CD74,CD4,TNFRSF1A,NFKBIA,TGFB1,CCL2,IL10RA,LTBR,OAS3,IRF1,TRAF2,BST2,CCL21,STAT3,ICAM1,F13A1,TP53,IFNAR1,FCER1G,VCAM1,CCR1,IL15,STAT6,IL16,FOS,CMKLR1,STAT2,RORC,MX2,JAK1,TNFSF13,IFNAR2,FYN,FN1,PSMB10,STAT1,IFNGR1,MCL1,MAP3K7,IL13RA1,IFIT1,IFIT2,CD40,IL2RG,PSMB9,PSMB8,HLA-C,TNFRSF1B,HLA-E,ANXA1,PIK3CD,ISG15,IL6ST,JAK2,IRF2,HLA-DRA,HLA-A,IL15RA,IRF7,ITGB2,LCP1,MX1,CSF2RB,BCL6,CDKN1A,IFI30,IFITM1,IL…
GO:0044419	interspecies interaction between organisms	114	1899	0.84	1.78e-68	9606.ENSP00000011653,9606.ENSP00000162749,9606.ENSP00000216797,9606.ENSP00000221930,9606.ENSP00000223095,9606.ENSP00000225698,9606.ENSP00000225831,9606.ENSP00000227752,9606.ENSP00000228918,9606.ENSP00000228928,9606.ENSP00000245414,9606.ENSP00000245907,9606.ENSP00000248244,9606.ENSP00000250092,9606.ENSP00000252593,9606.ENSP00000259607,9606.ENSP00000260010,9606.ENSP00000262510,9606.ENSP00000263642,…	CD4,TNFRSF1A,NFKBIA,TGFB1,SERPINE1,C1QBP,CCL2,IL10RA,LTBR,OAS3,IRF1,C3,TICAM1,CD68,BST2,CCL21,TLR2,NLRC5,IFIH1,STAT3,ICAM1,TP53,IFNAR1,ECSIT,SERPING1,FCER1G,BAX,ITGA5,CXCL16,VCAM1,AXL,IL16,CD14,CEBPB,FOS,CD84,C1QB,STAT2,APOL1,C7,MX2,SIGLEC1,JAK1,IFNAR2,TAP1,ATG7,FYN,FN1,ITGAL,CASP8,PSMB10,PIK3CG,TFRC,DPP4,STAT1,SBNO2,TLR1,CD47,IFNGR1,IFI16,MAP3K7,NFKB2,BCL10,IFIT1,IFIT2,CD40,TLR4,IL2RG,C1QA,PSMB9…
GO:0007166	cell surface receptor signaling pathway	118	2325	0.77	4.33e-64	9606.ENSP00000009530,9606.ENSP00000011653,9606.ENSP00000162749,9606.ENSP00000216797,9606.ENSP00000221930,9606.ENSP00000225831,9606.ENSP00000227752,9606.ENSP00000228918,9606.ENSP00000228928,9606.ENSP00000241261,9606.ENSP00000242786,9606.ENSP00000245414,9606.ENSP00000245907,9606.ENSP00000247668,9606.ENSP00000248244,9606.ENSP00000252593,9606.ENSP00000259607,9606.ENSP00000260010,9606.ENSP00000261799,…	CD74,CD4,TNFRSF1A,NFKBIA,TGFB1,CCL2,IL10RA,LTBR,OAS3,TNFSF10,CD97,IRF1,C3,TRAF2,TICAM1,BST2,CCL21,TLR2,PDGFRB,ITGAE,STAT3,ICAM1,F13A1,TP53,IFNAR1,FCGR2A,THY1,FCER1G,BAX,ITGA5,VCAM1,MERTK,CCR1,IL15,STAT6,AXL,C3AR1,IL16,CD14,COL3A1,FOS,CMKLR1,STAT2,CD276,RORC,MX2,JAK1,TNFSF13,IFNAR2,FYN,FN1,ITGAL,CASP8,PSMB10,STAT1,CD47,IFNGR1,FCGR3A,MCL1,MAP3K7,BCL10,IL13RA1,IFIT1,IFIT2,CD40,TLR4,IL2RG,KLF4,PSMB9,…
GO:0002682	regulation of immune system process	100	1514	0.88	4.98e-61	9606.ENSP00000009530,9606.ENSP00000011653,9606.ENSP00000216797,9606.ENSP00000221930,9606.ENSP00000223095,9606.ENSP00000225698,9606.ENSP00000225831,9606.ENSP00000245414,9606.ENSP00000245907,9606.ENSP00000247668,9606.ENSP00000248244,9606.ENSP00000250092,9606.ENSP00000252593,9606.ENSP00000259607,9606.ENSP00000262510,9606.ENSP00000264657,9606.ENSP00000264832,9606.ENSP00000271450,9606.ENSP00000278407,…	CD74,CD4,NFKBIA,TGFB1,SERPINE1,C1QBP,CCL2,IRF1,C3,TRAF2,TICAM1,CD68,BST2,CCL21,NLRC5,STAT3,ICAM1,FCGR2A,SERPING1,THY1,FCER1G,BAX,VCAM1,MERTK,CCR1,IL15,STAT6,AXL,C3AR1,IL16,COL3A1,CEBPB,FOS,CMKLR1,CD84,C1QB,CD276,C7,A2M,JAK1,TNFSF13,IFNAR2,FYN,ITGAL,CASP8,PSMB10,TFRC,DPP4,STAT1,CD47,IFNGR1,FCGR3A,IFI16,MAP3K7,BCL10,IFIT1,CD40,TLR4,C1QA,PSMB9,PSMB8,HLA-C,TNFRSF1B,HLA-E,ANXA1,PIK3CD,ISG15,DDX58,CD99…
GO:0071310	cellular response to organic substance	116	2369	0.75	6.13e-61	9606.ENSP00000009530,9606.ENSP00000011653,9606.ENSP00000162749,9606.ENSP00000216797,9606.ENSP00000221930,9606.ENSP00000223095,9606.ENSP00000225831,9606.ENSP00000227752,9606.ENSP00000228918,9606.ENSP00000228928,9606.ENSP00000243077,9606.ENSP00000245414,9606.ENSP00000247668,9606.ENSP00000248244,9606.ENSP00000250092,9606.ENSP00000252593,9606.ENSP00000259607,9606.ENSP00000260010,9606.ENSP00000261799,…	CD74,CD4,TNFRSF1A,NFKBIA,TGFB1,SERPINE1,CCL2,IL10RA,LTBR,OAS3,LRP1,IRF1,TRAF2,TICAM1,CD68,BST2,CCL21,TLR2,PDGFRB,IFIH1,STAT3,ICAM1,F13A1,TP53,IFNAR1,FCER1G,BAX,VCAM1,CCR1,IL15,STAT6,AXL,IL16,CD14,COL3A1,CEBPB,FOS,CMKLR1,STAT2,RORC,MX2,JAK1,TNFSF13,IFNAR2,ATG7,FYN,FN1,CASP8,PSMB10,PIK3CG,TFRC,STAT1,SBNO2,CD47,IFNGR1,IFI16,CTSS,MCL1,MAP3K7,BCL10,IL13RA1,IFIT1,IFIT2,CD40,TLR4,IL2RG,KLF4,PSMB9,PSMB8,…
GO:0051707	response to other organism	93	1256	0.93	9.22e-60	9606.ENSP00000011653,9606.ENSP00000162749,9606.ENSP00000216797,9606.ENSP00000221930,9606.ENSP00000223095,9606.ENSP00000225698,9606.ENSP00000225831,9606.ENSP00000227752,9606.ENSP00000228928,9606.ENSP00000245414,9606.ENSP00000245907,9606.ENSP00000248244,9606.ENSP00000250092,9606.ENSP00000252593,9606.ENSP00000259607,9606.ENSP00000260010,9606.ENSP00000262510,9606.ENSP00000263642,9606.ENSP00000264832,…	CD4,TNFRSF1A,NFKBIA,TGFB1,SERPINE1,C1QBP,CCL2,IL10RA,OAS3,IRF1,C3,TICAM1,CD68,BST2,CCL21,TLR2,NLRC5,IFIH1,ICAM1,TP53,IFNAR1,ECSIT,SERPING1,FCER1G,CXCL16,VCAM1,AXL,CD14,CEBPB,FOS,CD84,C1QB,STAT2,APOL1,C7,MX2,JAK1,IFNAR2,ATG7,CASP8,PIK3CG,STAT1,SBNO2,TLR1,CD47,IFNGR1,IFI16,NFKB2,BCL10,IFIT1,IFIT2,CD40,TLR4,C1QA,PSMB8,HLA-C,TNFRSF1B,HLA-E,ANXA1,PIK3CD,CYBB,ISG15,DDX58,JAK2,IRF2,HLA-DRA,HLA-A,IRF7,MX…
GO:0006950	response to stress	131	3485	0.64	1.16e-59	9606.ENSP00000009530,9606.ENSP00000011653,9606.ENSP00000162749,9606.ENSP00000216797,9606.ENSP00000221930,9606.ENSP00000223095,9606.ENSP00000225698,9606.ENSP00000225831,9606.ENSP00000228928,9606.ENSP00000242786,9606.ENSP00000243077,9606.ENSP00000245414,9606.ENSP00000245907,9606.ENSP00000247668,9606.ENSP00000248244,9606.ENSP00000250092,9606.ENSP00000252593,9606.ENSP00000259607,9606.ENSP00000260010,…	CD74,CD4,TNFRSF1A,NFKBIA,TGFB1,SERPINE1,C1QBP,CCL2,OAS3,CD97,LRP1,IRF1,C3,TRAF2,TICAM1,CD68,BST2,CCL21,TLR2,PDGFRB,NLRC5,IFIH1,STAT3,ICAM1,F13A1,TP53,IFNAR1,ECSIT,SERPING1,DUSP6,FCER1G,BAX,ITGA5,CXCL16,VCAM1,MERTK,CCR1,IL15,STAT6,AXL,C3AR1,CD14,COL3A1,CEBPB,FOS,CMKLR1,CD84,C1QB,STAT2,APOL1,C7,A2M,MX2,SIGLEC1,JAK1,IFNAR2,TAP1,ATG7,FYN,FN1,ITGAL,CASP8,PSMB10,CD163,PIK3CG,DPP4,STAT1,TLR1,CD47,IFNGR1…
GO:0050776	regulation of immune response	82	896	1.02	5.89e-58	9606.ENSP00000009530,9606.ENSP00000011653,9606.ENSP00000221930,9606.ENSP00000225698,9606.ENSP00000245414,9606.ENSP00000245907,9606.ENSP00000247668,9606.ENSP00000248244,9606.ENSP00000252593,9606.ENSP00000262510,9606.ENSP00000264832,9606.ENSP00000271450,9606.ENSP00000278407,9606.ENSP00000284240,9606.ENSP00000289902,9606.ENSP00000293288,9606.ENSP00000294728,9606.ENSP00000296545,9606.ENSP00000300134,…	CD74,CD4,TGFB1,C1QBP,IRF1,C3,TRAF2,TICAM1,BST2,NLRC5,ICAM1,FCGR2A,SERPING1,THY1,FCER1G,BAX,VCAM1,IL15,STAT6,C3AR1,COL3A1,FOS,CMKLR1,CD84,C1QB,CD276,C7,A2M,JAK1,TNFSF13,IFNAR2,FYN,ITGAL,PSMB10,TFRC,STAT1,CD47,IFNGR1,FCGR3A,IFI16,MAP3K7,BCL10,CD40,TLR4,C1QA,PSMB9,PSMB8,HLA-C,TNFRSF1B,HLA-E,ANXA1,PIK3CD,DDX58,CD99,IL6ST,JAK2,HLA-DRA,NFATC2,HLA-A,IRF7,ITGB2,MAP3K1,BCL6,C1S,IFITM1,IL1R1,HLA-DPA1,HLA-D…
GO:0045087	innate immune response	76	703	1.09	7.17e-58	9606.ENSP00000225698,9606.ENSP00000225831,9606.ENSP00000228928,9606.ENSP00000245414,9606.ENSP00000245907,9606.ENSP00000248244,9606.ENSP00000252593,9606.ENSP00000259607,9606.ENSP00000260010,9606.ENSP00000262510,9606.ENSP00000263642,9606.ENSP00000264832,9606.ENSP00000269305,9606.ENSP00000270139,9606.ENSP00000270517,9606.ENSP00000278407,9606.ENSP00000289902,9606.ENSP00000293778,9606.ENSP00000294728,…	C1QBP,CCL2,OAS3,IRF1,C3,TICAM1,BST2,CCL21,TLR2,NLRC5,IFIH1,ICAM1,TP53,IFNAR1,ECSIT,SERPING1,FCER1G,CXCL16,VCAM1,AXL,CD14,CD84,C1QB,STAT2,APOL1,C7,MX2,JAK1,IFNAR2,PIK3CG,STAT1,TLR1,CD47,IFNGR1,IFI16,NFKB2,BCL10,IFIT1,IFIT2,CD40,TLR4,C1QA,PSMB8,HLA-C,HLA-E,ANXA1,PIK3CD,CYBB,ISG15,DDX58,JAK2,IRF2,HLA-DRA,HLA-A,IRF7,MX1,IFI30,C1S,IFITM1,HLA-DPA1,IFI35,HLA-B,MYD88,HLA-DPB1,HLA-G,CFB,IKBKB,CASP1,C1R,HC…
GO:0098542	defense response to other organism	82	900	1.02	7.24e-58	9606.ENSP00000011653,9606.ENSP00000162749,9606.ENSP00000223095,9606.ENSP00000225698,9606.ENSP00000225831,9606.ENSP00000228928,9606.ENSP00000245414,9606.ENSP00000245907,9606.ENSP00000248244,9606.ENSP00000252593,9606.ENSP00000259607,9606.ENSP00000260010,9606.ENSP00000262510,9606.ENSP00000263642,9606.ENSP00000264832,9606.ENSP00000269305,9606.ENSP00000270139,9606.ENSP00000270517,9606.ENSP00000278407,…	CD4,TNFRSF1A,SERPINE1,C1QBP,CCL2,OAS3,IRF1,C3,TICAM1,BST2,CCL21,TLR2,NLRC5,IFIH1,ICAM1,TP53,IFNAR1,ECSIT,SERPING1,FCER1G,CXCL16,VCAM1,AXL,CD14,CEBPB,CD84,C1QB,STAT2,APOL1,C7,MX2,JAK1,IFNAR2,ATG7,PIK3CG,STAT1,TLR1,CD47,IFNGR1,IFI16,NFKB2,BCL10,IFIT1,IFIT2,CD40,TLR4,C1QA,PSMB8,HLA-C,HLA-E,ANXA1,PIK3CD,CYBB,ISG15,DDX58,JAK2,IRF2,HLA-DRA,HLA-A,IRF7,MX1,IFI30,C1S,IFITM1,HLA-DPA1,IFI35,HLA-B,MYD88,HLA-…
GO:0010033	response to organic substance	121	3011	0.67	1.11e-55	9606.ENSP00000009530,9606.ENSP00000011653,9606.ENSP00000162749,9606.ENSP00000216797,9606.ENSP00000221930,9606.ENSP00000223095,9606.ENSP00000225831,9606.ENSP00000227752,9606.ENSP00000228918,9606.ENSP00000228928,9606.ENSP00000241261,9606.ENSP00000243077,9606.ENSP00000245414,9606.ENSP00000247668,9606.ENSP00000248244,9606.ENSP00000250092,9606.ENSP00000252593,9606.ENSP00000259607,9606.ENSP00000260010,…	CD74,CD4,TNFRSF1A,NFKBIA,TGFB1,SERPINE1,CCL2,IL10RA,LTBR,OAS3,TNFSF10,LRP1,IRF1,TRAF2,TICAM1,CD68,BST2,CCL21,TLR2,PDGFRB,IFIH1,STAT3,ICAM1,F13A1,TP53,IFNAR1,DUSP6,FCER1G,BAX,CXCL16,VCAM1,CCR1,IL15,STAT6,AXL,IL16,CD14,COL3A1,CEBPB,FOS,CMKLR1,STAT2,RORC,MX2,JAK1,TNFSF13,IFNAR2,ATG7,FYN,FN1,CASP8,PSMB10,PIK3CG,TFRC,STAT1,SBNO2,TLR1,CD47,IFNGR1,IFI16,CTSS,MCL1,MAP3K7,NFKB2,BCL10,IL13RA1,IFIT1,IFIT2,C…
GO:0009605	response to external stimulus	109	2310	0.73	2.3e-54	9606.ENSP00000011653,9606.ENSP00000162749,9606.ENSP00000216797,9606.ENSP00000221930,9606.ENSP00000223095,9606.ENSP00000225698,9606.ENSP00000225831,9606.ENSP00000227752,9606.ENSP00000228918,9606.ENSP00000228928,9606.ENSP00000243077,9606.ENSP00000245414,9606.ENSP00000245907,9606.ENSP00000248244,9606.ENSP00000250092,9606.ENSP00000252593,9606.ENSP00000259607,9606.ENSP00000260010,9606.ENSP00000261799,…	CD4,TNFRSF1A,NFKBIA,TGFB1,SERPINE1,C1QBP,CCL2,IL10RA,LTBR,OAS3,LRP1,IRF1,C3,TICAM1,CD68,BST2,CCL21,TLR2,PDGFRB,NLRC5,IFIH1,CKLF,ICAM1,TP53,IFNAR1,ECSIT,SERPING1,FCER1G,CXCL16,VCAM1,CCR1,IL15,AXL,C3AR1,IL16,CD14,COL3A1,CEBPB,FOS,CMKLR1,CD84,C1QB,STAT2,APOL1,C7,MX2,JAK1,IFNAR2,ATG7,FYN,CASP8,PIK3CG,DPP4,STAT1,SBNO2,TLR1,CD47,IFNGR1,IFI16,NFKB2,BCL10,IFIT1,IFIT2,CD40,TLR4,C1QA,PSMB8,HLA-C,TNFRSF1B,H…
GO:0070887	cellular response to chemical stimulus	118	2919	0.67	7.19e-54	9606.ENSP00000009530,9606.ENSP00000011653,9606.ENSP00000162749,9606.ENSP00000216797,9606.ENSP00000221930,9606.ENSP00000223095,9606.ENSP00000225831,9606.ENSP00000227752,9606.ENSP00000228918,9606.ENSP00000228928,9606.ENSP00000243077,9606.ENSP00000245414,9606.ENSP00000247668,9606.ENSP00000248244,9606.ENSP00000250092,9606.ENSP00000252593,9606.ENSP00000259607,9606.ENSP00000260010,9606.ENSP00000261799,…	CD74,CD4,TNFRSF1A,NFKBIA,TGFB1,SERPINE1,CCL2,IL10RA,LTBR,OAS3,LRP1,IRF1,TRAF2,TICAM1,CD68,BST2,CCL21,TLR2,PDGFRB,IFIH1,CKLF,STAT3,ICAM1,F13A1,TP53,IFNAR1,FCER1G,BAX,CXCL16,VCAM1,CCR1,IL15,STAT6,AXL,IL16,CD14,COL3A1,CEBPB,FOS,CMKLR1,STAT2,RORC,MX2,JAK1,TNFSF13,IFNAR2,ATG7,FYN,FN1,CASP8,PSMB10,PIK3CG,TFRC,STAT1,SBNO2,CD47,IFNGR1,IFI16,CTSS,MCL1,MAP3K7,BCL10,IL13RA1,IFIT1,IFIT2,CD40,TLR4,IL2RG,KLF4,…
GO:0050896	response to stimulus	165	8046	0.37	3.66e-53	9606.ENSP00000009530,9606.ENSP00000011653,9606.ENSP00000162749,9606.ENSP00000216797,9606.ENSP00000221930,9606.ENSP00000223095,9606.ENSP00000225698,9606.ENSP00000225831,9606.ENSP00000227752,9606.ENSP00000228918,9606.ENSP00000228928,9606.ENSP00000241261,9606.ENSP00000242786,9606.ENSP00000243077,9606.ENSP00000245414,9606.ENSP00000245907,9606.ENSP00000247668,9606.ENSP00000248244,9606.ENSP00000250092,…	CD74,CD4,TNFRSF1A,NFKBIA,TGFB1,SERPINE1,C1QBP,CCL2,IL10RA,LTBR,OAS3,TNFSF10,CD97,LRP1,IRF1,C3,TRAF2,TICAM1,CD68,BST2,CCL21,TLR2,PDGFRB,NLRC5,ITGAE,IFIH1,CKLF,STAT3,ICAM1,F13A1,TP53,IFNAR1,ECSIT,CD53,FCGR2A,SERPING1,DUSP6,THY1,FCER1G,BAX,ITGA5,CXCL16,VCAM1,MERTK,CCR1,IL15,STAT6,AXL,C3AR1,IL16,CD14,COL3A1,CEBPB,FOS,CD164,CMKLR1,CD84,C1QB,STAT2,APOL1,CD276,C7,A2M,RORC,MX2,SIGLEC1,JAK1,TNFSF13,IFNAR2…
GO:0002684	positive regulation of immune system process	79	949	0.98	1.25e-52	9606.ENSP00000009530,9606.ENSP00000011653,9606.ENSP00000221930,9606.ENSP00000223095,9606.ENSP00000225698,9606.ENSP00000225831,9606.ENSP00000245907,9606.ENSP00000247668,9606.ENSP00000248244,9606.ENSP00000259607,9606.ENSP00000262510,9606.ENSP00000264657,9606.ENSP00000264832,9606.ENSP00000271450,9606.ENSP00000278407,9606.ENSP00000284240,9606.ENSP00000289902,9606.ENSP00000293288,9606.ENSP00000294728,…	CD74,CD4,TGFB1,SERPINE1,C1QBP,CCL2,C3,TRAF2,TICAM1,CCL21,NLRC5,STAT3,ICAM1,FCGR2A,SERPING1,THY1,FCER1G,BAX,VCAM1,CCR1,IL15,STAT6,AXL,C3AR1,IL16,FOS,CMKLR1,CD84,C1QB,CD276,C7,TNFSF13,FYN,CASP8,PSMB10,TFRC,DPP4,STAT1,CD47,FCGR3A,IFI16,MAP3K7,BCL10,CD40,TLR4,C1QA,PSMB9,PSMB8,HLA-E,ANXA1,PIK3CD,ISG15,DDX58,CD99,IL6ST,HLA-DRA,NFATC2,HLA-A,IRF7,ITGB2,BCL6,CDKN1A,C1S,IL1R1,HLA-DPA1,HLA-DMB,HLA-B,INPP5D,…
GO:0007165	signal transduction	140	4876	0.52	3.7e-52	9606.ENSP00000009530,9606.ENSP00000011653,9606.ENSP00000162749,9606.ENSP00000216797,9606.ENSP00000221930,9606.ENSP00000225698,9606.ENSP00000225831,9606.ENSP00000227752,9606.ENSP00000228918,9606.ENSP00000228928,9606.ENSP00000241261,9606.ENSP00000242786,9606.ENSP00000243077,9606.ENSP00000245414,9606.ENSP00000245907,9606.ENSP00000247668,9606.ENSP00000248244,9606.ENSP00000252593,9606.ENSP00000259607,…	CD74,CD4,TNFRSF1A,NFKBIA,TGFB1,C1QBP,CCL2,IL10RA,LTBR,OAS3,TNFSF10,CD97,LRP1,IRF1,C3,TRAF2,TICAM1,BST2,CCL21,TLR2,PDGFRB,NLRC5,ITGAE,IFIH1,CKLF,STAT3,ICAM1,F13A1,TP53,IFNAR1,CD53,FCGR2A,DUSP6,THY1,FCER1G,BAX,ITGA5,CXCL16,VCAM1,MERTK,CCR1,IL15,STAT6,AXL,C3AR1,IL16,CD14,COL3A1,CEBPB,FOS,CD164,CMKLR1,STAT2,CD276,RORC,MX2,JAK1,TNFSF13,IFNAR2,FYN,FN1,ITGAL,CASP8,PSMB10,PIK3CG,TFRC,DPP4,STAT1,TLR1,CD47…
GO:0007154	cell communication	143	5320	0.49	1.13e-50	9606.ENSP00000009530,9606.ENSP00000011653,9606.ENSP00000162749,9606.ENSP00000216797,9606.ENSP00000221930,9606.ENSP00000225698,9606.ENSP00000225831,9606.ENSP00000227752,9606.ENSP00000228918,9606.ENSP00000228928,9606.ENSP00000241261,9606.ENSP00000242786,9606.ENSP00000243077,9606.ENSP00000245414,9606.ENSP00000245907,9606.ENSP00000247668,9606.ENSP00000248244,9606.ENSP00000250092,9606.ENSP00000252593,…	CD74,CD4,TNFRSF1A,NFKBIA,TGFB1,C1QBP,CCL2,IL10RA,LTBR,OAS3,TNFSF10,CD97,LRP1,IRF1,C3,TRAF2,TICAM1,CD68,BST2,CCL21,TLR2,PDGFRB,NLRC5,ITGAE,IFIH1,CKLF,STAT3,ICAM1,F13A1,TP53,IFNAR1,CD53,FCGR2A,DUSP6,THY1,FCER1G,BAX,ITGA5,CXCL16,VCAM1,MERTK,CCR1,IL15,STAT6,AXL,C3AR1,IL16,CD14,COL3A1,CEBPB,FOS,CD164,CMKLR1,STAT2,CD276,RORC,MX2,JAK1,TNFSF13,IFNAR2,ATG7,FYN,FN1,ITGAL,CASP8,PSMB10,PIK3CG,TFRC,DPP4,STAT1…
GO:0023052	signaling	142	5239	0.49	1.99e-50	9606.ENSP00000009530,9606.ENSP00000011653,9606.ENSP00000162749,9606.ENSP00000216797,9606.ENSP00000221930,9606.ENSP00000225698,9606.ENSP00000225831,9606.ENSP00000227752,9606.ENSP00000228918,9606.ENSP00000228928,9606.ENSP00000241261,9606.ENSP00000242786,9606.ENSP00000243077,9606.ENSP00000245414,9606.ENSP00000245907,9606.ENSP00000247668,9606.ENSP00000248244,9606.ENSP00000250092,9606.ENSP00000252593,…	CD74,CD4,TNFRSF1A,NFKBIA,TGFB1,C1QBP,CCL2,IL10RA,LTBR,OAS3,TNFSF10,CD97,LRP1,IRF1,C3,TRAF2,TICAM1,CD68,BST2,CCL21,TLR2,PDGFRB,NLRC5,ITGAE,IFIH1,CKLF,STAT3,ICAM1,F13A1,TP53,IFNAR1,CD53,FCGR2A,DUSP6,THY1,FCER1G,BAX,ITGA5,CXCL16,VCAM1,MERTK,CCR1,IL15,STAT6,AXL,C3AR1,IL16,CD14,COL3A1,CEBPB,FOS,CD164,CMKLR1,STAT2,CD276,RORC,MX2,JAK1,TNFSF13,IFNAR2,FYN,FN1,ITGAL,CASP8,PSMB10,PIK3CG,TFRC,DPP4,STAT1,TLR1…
GO:0042221	response to chemical	128	4333	0.53	1.42e-45	9606.ENSP00000009530,9606.ENSP00000011653,9606.ENSP00000162749,9606.ENSP00000216797,9606.ENSP00000221930,9606.ENSP00000223095,9606.ENSP00000225831,9606.ENSP00000227752,9606.ENSP00000228918,9606.ENSP00000228928,9606.ENSP00000241261,9606.ENSP00000243077,9606.ENSP00000245414,9606.ENSP00000247668,9606.ENSP00000248244,9606.ENSP00000250092,9606.ENSP00000252593,9606.ENSP00000259607,9606.ENSP00000260010,…	CD74,CD4,TNFRSF1A,NFKBIA,TGFB1,SERPINE1,CCL2,IL10RA,LTBR,OAS3,TNFSF10,LRP1,IRF1,TRAF2,TICAM1,CD68,BST2,CCL21,TLR2,PDGFRB,IFIH1,CKLF,STAT3,ICAM1,F13A1,TP53,IFNAR1,DUSP6,FCER1G,BAX,CXCL16,VCAM1,CCR1,IL15,STAT6,AXL,C3AR1,IL16,CD14,COL3A1,CEBPB,FOS,CMKLR1,STAT2,RORC,MX2,JAK1,TNFSF13,IFNAR2,ATG7,FYN,FN1,CASP8,PSMB10,PIK3CG,TFRC,DPP4,STAT1,SBNO2,TLR1,CD47,IFNGR1,IFI16,CTSS,MCL1,MAP3K7,NFKB2,BCL10,IL13R…
GO:0048584	positive regulation of response to stimulus	98	2257	0.7	7.33e-44	9606.ENSP00000009530,9606.ENSP00000011653,9606.ENSP00000162749,9606.ENSP00000216797,9606.ENSP00000221930,9606.ENSP00000223095,9606.ENSP00000225698,9606.ENSP00000225831,9606.ENSP00000227752,9606.ENSP00000228918,9606.ENSP00000241261,9606.ENSP00000243077,9606.ENSP00000245907,9606.ENSP00000247668,9606.ENSP00000248244,9606.ENSP00000252593,9606.ENSP00000259607,9606.ENSP00000260010,9606.ENSP00000261799,…	CD74,CD4,TNFRSF1A,NFKBIA,TGFB1,SERPINE1,C1QBP,CCL2,IL10RA,LTBR,TNFSF10,LRP1,C3,TRAF2,TICAM1,BST2,CCL21,TLR2,PDGFRB,NLRC5,IFIH1,STAT3,ICAM1,TP53,FCGR2A,SERPING1,DUSP6,THY1,FCER1G,BAX,ITGA5,CCR1,IL15,STAT6,AXL,C3AR1,IL16,CD14,COL3A1,CEBPB,CMKLR1,C1QB,CD276,C7,TNFSF13,FYN,CASP8,PSMB10,PIK3CG,TFRC,TLR1,CD47,FCGR3A,IFI16,MCL1,MAP3K7,BCL10,CD40,TLR4,C1QA,PSMB9,PSMB8,HLA-E,ANXA1,PIK3CD,DDX58,IL6ST,JAK2,…
GO:0048583	regulation of response to stimulus	123	4114	0.54	3.93e-43	9606.ENSP00000009530,9606.ENSP00000011653,9606.ENSP00000162749,9606.ENSP00000216797,9606.ENSP00000221930,9606.ENSP00000223095,9606.ENSP00000225698,9606.ENSP00000225831,9606.ENSP00000227752,9606.ENSP00000228918,9606.ENSP00000241261,9606.ENSP00000243077,9606.ENSP00000245414,9606.ENSP00000245907,9606.ENSP00000247668,9606.ENSP00000248244,9606.ENSP00000252593,9606.ENSP00000259607,9606.ENSP00000260010,…	CD74,CD4,TNFRSF1A,NFKBIA,TGFB1,SERPINE1,C1QBP,CCL2,IL10RA,LTBR,TNFSF10,LRP1,IRF1,C3,TRAF2,TICAM1,BST2,CCL21,TLR2,PDGFRB,NLRC5,IFIH1,STAT3,ICAM1,TP53,FCGR2A,SERPING1,DUSP6,THY1,FCER1G,BAX,ITGA5,VCAM1,CCR1,IL15,STAT6,AXL,C3AR1,IL16,CD14,COL3A1,CEBPB,FOS,CMKLR1,CD84,C1QB,CD276,C7,A2M,JAK1,TNFSF13,IFNAR2,ATG7,FYN,FN1,ITGAL,CASP8,PSMB10,PIK3CG,TFRC,DPP4,STAT1,SBNO2,TLR1,CD47,IFNGR1,FCGR3A,IFI16,MCL1,M…
GO:0002252	immune effector process	71	969	0.93	6.84e-43	9606.ENSP00000009530,9606.ENSP00000225698,9606.ENSP00000228928,9606.ENSP00000242786,9606.ENSP00000243077,9606.ENSP00000245414,9606.ENSP00000245907,9606.ENSP00000248244,9606.ENSP00000250092,9606.ENSP00000252593,9606.ENSP00000260010,9606.ENSP00000262510,9606.ENSP00000263642,9606.ENSP00000264657,9606.ENSP00000264832,9606.ENSP00000269305,9606.ENSP00000271324,9606.ENSP00000271450,9606.ENSP00000278407,…	CD74,C1QBP,OAS3,CD97,LRP1,IRF1,C3,TICAM1,CD68,BST2,TLR2,NLRC5,IFIH1,STAT3,ICAM1,TP53,CD53,FCGR2A,SERPING1,FCER1G,STAT6,C3AR1,CD14,CEBPB,C1QB,STAT2,C7,RORC,MX2,IFNAR2,ATG7,FYN,ITGAL,PIK3CG,STAT1,SBNO2,CD47,FCGR3A,IFI16,CTSS,BCL10,IFIT1,IFIT2,CD40,TLR4,C1QA,HLA-C,TNFRSF1B,PIK3CD,CYBB,ISG15,DDX58,IRF2,HLA-A,IRF7,ITGB2,LCP1,MX1,C1S,IFITM1,HLA-B,INPP5D,PTPRC,HLA-G,CFB,MME,C1R,HCK,PECAM1,IFI27,IFITM2
GO:0051716	cellular response to stimulus	146	6489	0.41	1.05e-42	9606.ENSP00000009530,9606.ENSP00000011653,9606.ENSP00000162749,9606.ENSP00000216797,9606.ENSP00000221930,9606.ENSP00000223095,9606.ENSP00000225698,9606.ENSP00000225831,9606.ENSP00000227752,9606.ENSP00000228918,9606.ENSP00000228928,9606.ENSP00000241261,9606.ENSP00000242786,9606.ENSP00000243077,9606.ENSP00000245414,9606.ENSP00000245907,9606.ENSP00000247668,9606.ENSP00000248244,9606.ENSP00000250092,…	CD74,CD4,TNFRSF1A,NFKBIA,TGFB1,SERPINE1,C1QBP,CCL2,IL10RA,LTBR,OAS3,TNFSF10,CD97,LRP1,IRF1,C3,TRAF2,TICAM1,CD68,BST2,CCL21,TLR2,PDGFRB,NLRC5,ITGAE,IFIH1,CKLF,STAT3,ICAM1,F13A1,TP53,IFNAR1,CD53,FCGR2A,DUSP6,THY1,FCER1G,BAX,ITGA5,CXCL16,VCAM1,MERTK,CCR1,IL15,STAT6,AXL,C3AR1,IL16,CD14,COL3A1,CEBPB,FOS,CD164,CMKLR1,STAT2,CD276,RORC,MX2,JAK1,TNFSF13,IFNAR2,ATG7,FYN,FN1,ITGAL,CASP8,PSMB10,PIK3CG,TFRC,D…
GO:0001817	regulation of cytokine production	64	742	1	5.51e-42	9606.ENSP00000009530,9606.ENSP00000011653,9606.ENSP00000221930,9606.ENSP00000223095,9606.ENSP00000225698,9606.ENSP00000243077,9606.ENSP00000245414,9606.ENSP00000245907,9606.ENSP00000247668,9606.ENSP00000248244,9606.ENSP00000252593,9606.ENSP00000260010,9606.ENSP00000262510,9606.ENSP00000263642,9606.ENSP00000264657,9606.ENSP00000289902,9606.ENSP00000295408,9606.ENSP00000296545,9606.ENSP00000300134,…	CD74,CD4,TGFB1,SERPINE1,C1QBP,LRP1,IRF1,C3,TRAF2,TICAM1,BST2,TLR2,NLRC5,IFIH1,STAT3,FCER1G,MERTK,IL15,STAT6,AXL,C3AR1,IL16,CD14,CEBPB,CMKLR1,CD84,CD276,FN1,CASP8,STAT1,TLR1,CD47,IFNGR1,IFI16,MAP3K7,NFKB2,BCL10,CD40,TLR4,KLF4,TNFRSF1B,HLA-E,ANXA1,CYBB,ISG15,DDX58,IL6ST,JAK2,HLA-A,IRF7,BCL6,IL1R1,NFATC4,HLA-DPA1,HLA-B,MYD88,INPP5D,HLA-DPB1,PTPRC,HLA-G,CD200,CASP1,TRAF3,TNFAIP3
GO:0050778	positive regulation of immune response	59	607	1.05	5.95e-41	9606.ENSP00000009530,9606.ENSP00000011653,9606.ENSP00000221930,9606.ENSP00000225698,9606.ENSP00000245907,9606.ENSP00000247668,9606.ENSP00000248244,9606.ENSP00000262510,9606.ENSP00000271450,9606.ENSP00000278407,9606.ENSP00000284240,9606.ENSP00000289902,9606.ENSP00000293288,9606.ENSP00000296545,9606.ENSP00000300134,9606.ENSP00000302079,9606.ENSP00000311733,9606.ENSP00000313967,9606.ENSP00000320084,…	CD74,CD4,TGFB1,C1QBP,C3,TRAF2,TICAM1,NLRC5,FCGR2A,SERPING1,THY1,FCER1G,BAX,IL15,STAT6,C3AR1,CMKLR1,C1QB,CD276,C7,TNFSF13,FYN,PSMB10,TFRC,FCGR3A,IFI16,MAP3K7,BCL10,CD40,TLR4,C1QA,PSMB9,PSMB8,HLA-E,ANXA1,PIK3CD,DDX58,IL6ST,HLA-DRA,NFATC2,HLA-A,IRF7,ITGB2,C1S,IL1R1,HLA-DPA1,HLA-DMB,HLA-B,INPP5D,HLA-DPB1,PTPRC,HLA-G,ICAM2,CFB,IKBKB,C1R,HCK,CCL5,IKBKG
GO:0048518	positive regulation of biological process	141	6112	0.42	6.83e-41	9606.ENSP00000009530,9606.ENSP00000011653,9606.ENSP00000162749,9606.ENSP00000216797,9606.ENSP00000221930,9606.ENSP00000223095,9606.ENSP00000225698,9606.ENSP00000225831,9606.ENSP00000227752,9606.ENSP00000228918,9606.ENSP00000241261,9606.ENSP00000243077,9606.ENSP00000245414,9606.ENSP00000245907,9606.ENSP00000247668,9606.ENSP00000248244,9606.ENSP00000252593,9606.ENSP00000259607,9606.ENSP00000260010,…	CD74,CD4,TNFRSF1A,NFKBIA,TGFB1,SERPINE1,C1QBP,CCL2,IL10RA,LTBR,TNFSF10,LRP1,IRF1,C3,TRAF2,TICAM1,BST2,CCL21,TLR2,PDGFRB,MSR1,NLRC5,IFIH1,STAT3,ICAM1,MFGE8,TP53,CD53,FCGR2A,SERPING1,DUSP6,THY1,FCER1G,BAX,ITGA5,CXCL16,VCAM1,MERTK,CCR1,IL15,STAT6,AXL,C3AR1,IL16,CD14,COL3A1,CEBPB,FOS,CMKLR1,CD84,C1QB,STAT2,CD276,C7,RORC,JAK1,TNFSF13,ANP32B,ATG7,FYN,FN1,CASP8,PSMB10,PIK3CG,TFRC,DPP4,STAT1,SBNO2,TLR1,C…
GO:0032101	regulation of response to external stimulus	65	1013	0.87	2.31e-35	9606.ENSP00000009530,9606.ENSP00000162749,9606.ENSP00000216797,9606.ENSP00000221930,9606.ENSP00000223095,9606.ENSP00000225698,9606.ENSP00000225831,9606.ENSP00000243077,9606.ENSP00000245414,9606.ENSP00000245907,9606.ENSP00000248244,9606.ENSP00000259607,9606.ENSP00000260010,9606.ENSP00000261799,9606.ENSP00000262510,9606.ENSP00000264657,9606.ENSP00000278407,9606.ENSP00000289902,9606.ENSP00000296140,…	CD74,TNFRSF1A,NFKBIA,TGFB1,SERPINE1,C1QBP,CCL2,LRP1,IRF1,C3,TICAM1,CCL21,TLR2,PDGFRB,NLRC5,STAT3,SERPING1,FCER1G,CCR1,IL15,C3AR1,IL16,CEBPB,CMKLR1,A2M,JAK1,IFNAR2,FYN,PSMB10,PIK3CG,DPP4,STAT1,SBNO2,CD47,IFNGR1,IFI16,MAP3K7,BCL10,IFIT1,TLR4,KLF4,PSMB9,PSMB8,HLA-E,ANXA1,DDX58,IL6ST,JAK2,HLA-A,IRF7,BCL6,IL1R1,CXCR4,HLA-B,MYD88,PTPRC,HLA-G,ICAM2,IKBKB,CASP1,HCK,TRAF3,CCL5,TNFAIP3,IKBKG
GO:0006954	inflammatory response	50	515	1.05	6.17e-34	9606.ENSP00000162749,9606.ENSP00000221930,9606.ENSP00000225831,9606.ENSP00000242786,9606.ENSP00000243077,9606.ENSP00000245907,9606.ENSP00000248244,9606.ENSP00000250092,9606.ENSP00000259607,9606.ENSP00000260010,9606.ENSP00000264657,9606.ENSP00000264832,9606.ENSP00000289902,9606.ENSP00000296140,9606.ENSP00000296545,9606.ENSP00000301178,9606.ENSP00000302079,9606.ENSP00000304236,9606.ENSP00000305422,…	TNFRSF1A,TGFB1,CCL2,CD97,LRP1,C3,TICAM1,CD68,CCL21,TLR2,STAT3,ICAM1,FCER1G,CCR1,IL15,AXL,C3AR1,CD14,CEBPB,FOS,CMKLR1,SIGLEC1,FN1,ITGAL,CD163,PIK3CG,TLR1,CD47,IFNGR1,IFI16,NFKB2,CD40,TLR4,C1QA,TNFRSF1B,ANXA1,PIK3CD,CYBB,JAK2,ITGB2,BCL6,IL1R1,CXCR4,NFATC4,MYD88,IKBKB,HCK,CCL5,TNFAIP3,IKBKG
GO:0001775	cell activation	65	1075	0.84	6.53e-34	9606.ENSP00000009530,9606.ENSP00000011653,9606.ENSP00000228918,9606.ENSP00000242786,9606.ENSP00000243077,9606.ENSP00000245414,9606.ENSP00000245907,9606.ENSP00000248244,9606.ENSP00000250092,9606.ENSP00000252593,9606.ENSP00000259607,9606.ENSP00000260010,9606.ENSP00000264657,9606.ENSP00000264832,9606.ENSP00000269305,9606.ENSP00000271324,9606.ENSP00000271450,9606.ENSP00000289902,9606.ENSP00000293288,…	CD74,CD4,LTBR,CD97,LRP1,IRF1,C3,TICAM1,CD68,BST2,CCL21,TLR2,STAT3,ICAM1,TP53,CD53,FCGR2A,FCER1G,BAX,VCAM1,MERTK,IL15,STAT6,AXL,C3AR1,CD14,COL3A1,CEBPB,CD276,RORC,ATG7,FYN,ITGAL,CASP8,PSMB10,PIK3CG,DPP4,SBNO2,TLR1,CD47,IFNGR1,CTSS,NFKB2,CD40,CCND3,TLR4,C1QA,HLA-C,TNFRSF1B,HLA-E,ANXA1,PIK3CD,CYBB,JAK2,HLA-A,ITGB2,LCP1,BCL6,HLA-B,PTPRC,MME,ITGB3,PECAM1,FLT3LG,CCL5
GO:0045321	leukocyte activation	61	929	0.88	2.28e-33	9606.ENSP00000009530,9606.ENSP00000011653,9606.ENSP00000228918,9606.ENSP00000242786,9606.ENSP00000245414,9606.ENSP00000245907,9606.ENSP00000248244,9606.ENSP00000250092,9606.ENSP00000252593,9606.ENSP00000259607,9606.ENSP00000260010,9606.ENSP00000264657,9606.ENSP00000264832,9606.ENSP00000269305,9606.ENSP00000271324,9606.ENSP00000271450,9606.ENSP00000289902,9606.ENSP00000293288,9606.ENSP00000294728,…	CD74,CD4,LTBR,CD97,IRF1,C3,TICAM1,CD68,BST2,CCL21,TLR2,STAT3,ICAM1,TP53,CD53,FCGR2A,FCER1G,BAX,VCAM1,MERTK,IL15,STAT6,AXL,C3AR1,CD14,CEBPB,CD276,RORC,ATG7,FYN,ITGAL,CASP8,PSMB10,PIK3CG,DPP4,SBNO2,TLR1,CD47,IFNGR1,CTSS,CD40,CCND3,TLR4,C1QA,HLA-C,TNFRSF1B,HLA-E,ANXA1,PIK3CD,CYBB,JAK2,HLA-A,ITGB2,LCP1,BCL6,HLA-B,PTPRC,MME,PECAM1,FLT3LG,CCL5
GO:0031347	regulation of defense response	54	674	0.96	4.69e-33	9606.ENSP00000162749,9606.ENSP00000216797,9606.ENSP00000223095,9606.ENSP00000225698,9606.ENSP00000245414,9606.ENSP00000245907,9606.ENSP00000248244,9606.ENSP00000260010,9606.ENSP00000262510,9606.ENSP00000264657,9606.ENSP00000278407,9606.ENSP00000289902,9606.ENSP00000296545,9606.ENSP00000302935,9606.ENSP00000305422,9606.ENSP00000323929,9606.ENSP00000343204,9606.ENSP00000343957,9606.ENSP00000346671,…	TNFRSF1A,NFKBIA,SERPINE1,C1QBP,IRF1,C3,TICAM1,TLR2,NLRC5,STAT3,SERPING1,FCER1G,IL15,IL16,CEBPB,A2M,JAK1,IFNAR2,FYN,PSMB10,PIK3CG,STAT1,SBNO2,CD47,IFNGR1,IFI16,MAP3K7,BCL10,IFIT1,TLR4,KLF4,PSMB9,PSMB8,HLA-E,ANXA1,DDX58,IL6ST,JAK2,HLA-A,IRF7,BCL6,IL1R1,HLA-B,MYD88,PTPRC,HLA-G,ICAM2,IKBKB,CASP1,HCK,TRAF3,CCL5,TNFAIP3,IKBKG
GO:0001819	positive regulation of cytokine production	47	461	1.07	1.39e-32	9606.ENSP00000009530,9606.ENSP00000011653,9606.ENSP00000221930,9606.ENSP00000223095,9606.ENSP00000243077,9606.ENSP00000245414,9606.ENSP00000245907,9606.ENSP00000247668,9606.ENSP00000248244,9606.ENSP00000260010,9606.ENSP00000263642,9606.ENSP00000264657,9606.ENSP00000289902,9606.ENSP00000296545,9606.ENSP00000300134,9606.ENSP00000302079,9606.ENSP00000302935,9606.ENSP00000304236,9606.ENSP00000305422,…	CD74,CD4,TGFB1,SERPINE1,LRP1,IRF1,C3,TRAF2,TICAM1,TLR2,IFIH1,STAT3,FCER1G,IL15,STAT6,C3AR1,IL16,CD14,CEBPB,CD276,CASP8,STAT1,TLR1,IFNGR1,IFI16,MAP3K7,NFKB2,BCL10,CD40,TLR4,HLA-E,ANXA1,CYBB,DDX58,IL6ST,JAK2,HLA-A,IRF7,IL1R1,NFATC4,HLA-DPA1,MYD88,HLA-DPB1,PTPRC,HLA-G,CD200,CASP1
GO:0048522	positive regulation of cellular process	125	5579	0.41	7.19e-31	9606.ENSP00000009530,9606.ENSP00000011653,9606.ENSP00000162749,9606.ENSP00000216797,9606.ENSP00000221930,9606.ENSP00000223095,9606.ENSP00000225698,9606.ENSP00000225831,9606.ENSP00000227752,9606.ENSP00000228918,9606.ENSP00000241261,9606.ENSP00000243077,9606.ENSP00000245414,9606.ENSP00000245907,9606.ENSP00000247668,9606.ENSP00000248244,9606.ENSP00000252593,9606.ENSP00000259607,9606.ENSP00000260010,…	CD74,CD4,TNFRSF1A,NFKBIA,TGFB1,SERPINE1,C1QBP,CCL2,IL10RA,LTBR,TNFSF10,LRP1,IRF1,C3,TRAF2,TICAM1,BST2,CCL21,TLR2,PDGFRB,MSR1,NLRC5,STAT3,ICAM1,MFGE8,TP53,CD53,DUSP6,THY1,FCER1G,BAX,ITGA5,CXCL16,VCAM1,MERTK,CCR1,IL15,STAT6,AXL,C3AR1,IL16,CD14,COL3A1,CEBPB,FOS,CMKLR1,STAT2,CD276,RORC,JAK1,TNFSF13,ANP32B,ATG7,FYN,FN1,CASP8,PSMB10,PIK3CG,TFRC,DPP4,STAT1,SBNO2,TLR1,CD47,IFNGR1,IFI16,CTSS,MCL1,MAP3K7,N…
GO:0002697	regulation of immune effector process	44	418	1.08	7.87e-31	9606.ENSP00000009530,9606.ENSP00000221930,9606.ENSP00000225698,9606.ENSP00000245907,9606.ENSP00000247668,9606.ENSP00000248244,9606.ENSP00000252593,9606.ENSP00000264832,9606.ENSP00000278407,9606.ENSP00000289902,9606.ENSP00000296545,9606.ENSP00000300134,9606.ENSP00000302079,9606.ENSP00000312367,9606.ENSP00000313967,9606.ENSP00000322061,9606.ENSP00000323929,9606.ENSP00000343505,9606.ENSP00000353224,…	CD74,TGFB1,C1QBP,C3,TRAF2,TICAM1,BST2,ICAM1,SERPING1,FCER1G,IL15,STAT6,C3AR1,CD84,C1QB,C7,A2M,TNFSF13,TFRC,STAT1,CD47,MAP3K7,BCL10,IFIT1,CD40,TLR4,C1QA,TNFRSF1B,HLA-E,ANXA1,DDX58,HLA-A,ITGB2,BCL6,C1S,IL1R1,HLA-DMB,HLA-B,PTPRC,HLA-G,CFB,C1R,TRAF3,TNFAIP3
GO:0034341	response to interferon-gamma	34	182	1.33	1.17e-30	9606.ENSP00000225831,9606.ENSP00000228928,9606.ENSP00000245414,9606.ENSP00000252593,9606.ENSP00000259607,9606.ENSP00000260010,9606.ENSP00000264832,9606.ENSP00000269305,9606.ENSP00000293778,9606.ENSP00000294728,9606.ENSP00000343204,9606.ENSP00000354394,9606.ENSP00000355361,9606.ENSP00000356713,9606.ENSP00000361359,9606.ENSP00000363089,9606.ENSP00000365402,9606.ENSP00000365817,9606.ENSP00000371067,…	CCL2,OAS3,IRF1,BST2,CCL21,TLR2,ICAM1,TP53,CXCL16,VCAM1,JAK1,STAT1,CD47,IFNGR1,CD40,TLR4,HLA-C,HLA-E,JAK2,IRF2,HLA-DRA,HLA-A,IRF7,IFI30,IFITM1,HLA-DPA1,HLA-B,HLA-DPB1,HLA-G,CASP1,HCK,MRC1,CCL5,IFITM2
GO:0002250	adaptive immune response	40	317	1.16	1.51e-30	9606.ENSP00000009530,9606.ENSP00000011653,9606.ENSP00000225698,9606.ENSP00000245907,9606.ENSP00000264657,9606.ENSP00000264832,9606.ENSP00000278407,9606.ENSP00000289902,9606.ENSP00000300134,9606.ENSP00000312367,9606.ENSP00000313967,9606.ENSP00000322061,9606.ENSP00000327025,9606.ENSP00000346206,9606.ENSP00000346671,9606.ENSP00000352121,9606.ENSP00000357981,9606.ENSP00000358983,9606.ENSP00000359612,…	CD74,CD4,C1QBP,C3,STAT3,ICAM1,SERPING1,FCER1G,STAT6,CD84,C1QB,C7,RORC,TAP1,FYN,PIK3CG,CTSS,NFKB2,BCL10,TLR4,C1QA,HLA-DMA,TAP2,HLA-C,HLA-E,ANXA1,PIK3CD,JAK2,HLA-DRA,HLA-A,IRF7,BCL6,C1S,HLA-DPA1,HLA-DMB,HLA-B,INPP5D,HLA-DPB1,HLA-G,C1R
GO:0060337	type I interferon signaling pathway	26	67	1.65	5.45e-30	9606.ENSP00000228928,9606.ENSP00000245414,9606.ENSP00000252593,9606.ENSP00000270139,9606.ENSP00000315768,9606.ENSP00000333657,9606.ENSP00000343204,9606.ENSP00000343957,9606.ENSP00000354394,9606.ENSP00000360869,9606.ENSP00000360891,9606.ENSP00000364016,9606.ENSP00000365402,9606.ENSP00000365817,9606.ENSP00000368699,9606.ENSP00000377218,9606.ENSP00000379873,9606.ENSP00000380697,9606.ENSP00000381601,…	OAS3,IRF1,BST2,IFNAR1,STAT2,MX2,JAK1,IFNAR2,STAT1,IFIT1,IFIT2,PSMB8,HLA-C,HLA-E,ISG15,IRF2,HLA-A,IRF7,MX1,IFITM1,IFI35,HLA-B,MYD88,HLA-G,IFI27,IFITM2
GO:0050867	positive regulation of cell activation	40	346	1.12	3.11e-29	9606.ENSP00000009530,9606.ENSP00000011653,9606.ENSP00000221930,9606.ENSP00000225831,9606.ENSP00000248244,9606.ENSP00000259607,9606.ENSP00000261799,9606.ENSP00000284240,9606.ENSP00000289902,9606.ENSP00000294728,9606.ENSP00000296545,9606.ENSP00000300134,9606.ENSP00000301178,9606.ENSP00000302935,9606.ENSP00000320084,9606.ENSP00000343505,9606.ENSP00000346671,9606.ENSP00000353224,9606.ENSP00000353731,…	CD74,CD4,TGFB1,CCL2,TICAM1,CCL21,PDGFRB,THY1,FCER1G,VCAM1,IL15,STAT6,AXL,IL16,CD276,TNFSF13,FYN,TFRC,DPP4,CD47,BCL10,CD40,TLR4,HLA-E,ANXA1,IL6ST,JAK2,NFATC2,HLA-A,ITGB2,BCL6,CDKN1A,HLA-DPA1,HLA-DMB,INPP5D,HLA-DPB1,PTPRC,HLA-G,FLT3LG,CCL5
GO:0044403	symbiotic process	55	865	0.86	5.39e-29	9606.ENSP00000011653,9606.ENSP00000162749,9606.ENSP00000216797,9606.ENSP00000225698,9606.ENSP00000225831,9606.ENSP00000228918,9606.ENSP00000248244,9606.ENSP00000263642,9606.ENSP00000264657,9606.ENSP00000264832,9606.ENSP00000269305,9606.ENSP00000293288,9606.ENSP00000293379,9606.ENSP00000301178,9606.ENSP00000302935,9606.ENSP00000315768,9606.ENSP00000317674,9606.ENSP00000341141,9606.ENSP00000346206,…	CD4,TNFRSF1A,NFKBIA,C1QBP,CCL2,LTBR,TICAM1,IFIH1,STAT3,ICAM1,TP53,BAX,ITGA5,AXL,IL16,STAT2,APOL1,SIGLEC1,TAP1,ATG7,FYN,FN1,ITGAL,CASP8,PSMB10,TFRC,DPP4,STAT1,MAP3K7,IFIT1,IL2RG,C1QA,PSMB9,PSMB8,TAP2,HLA-C,HLA-E,ISG15,DDX58,RPS6,IL6ST,TANK,HLA-DRA,HLA-A,IRF7,CXCR4,HLA-B,PTPRC,IKBKB,HCK,ITGB3,MRC1,CCL5,IFI27,IKBKG
GO:0050865	regulation of cell activation	47	571	0.98	8.28e-29	9606.ENSP00000009530,9606.ENSP00000011653,9606.ENSP00000221930,9606.ENSP00000225831,9606.ENSP00000245414,9606.ENSP00000248244,9606.ENSP00000259607,9606.ENSP00000261799,9606.ENSP00000284240,9606.ENSP00000289902,9606.ENSP00000294728,9606.ENSP00000295408,9606.ENSP00000296545,9606.ENSP00000300134,9606.ENSP00000301178,9606.ENSP00000302935,9606.ENSP00000305422,9606.ENSP00000312367,9606.ENSP00000320084,…	CD74,CD4,TGFB1,CCL2,IRF1,TICAM1,CCL21,PDGFRB,THY1,FCER1G,VCAM1,MERTK,IL15,STAT6,AXL,IL16,CEBPB,CD84,CD276,TNFSF13,FYN,TFRC,DPP4,CD47,BCL10,CD40,TLR4,TNFRSF1B,HLA-E,ANXA1,IL6ST,JAK2,NFATC2,HLA-A,ITGB2,BCL6,CDKN1A,HLA-DPA1,HLA-DMB,INPP5D,HLA-DPB1,PTPRC,HLA-G,CD200,FLT3LG,CCL5,TNFAIP3
GO:0051240	positive regulation of multicellular organismal process	73	1770	0.68	1.28e-28	9606.ENSP00000009530,9606.ENSP00000011653,9606.ENSP00000221930,9606.ENSP00000223095,9606.ENSP00000225698,9606.ENSP00000243077,9606.ENSP00000245414,9606.ENSP00000245907,9606.ENSP00000247668,9606.ENSP00000248244,9606.ENSP00000260010,9606.ENSP00000261799,9606.ENSP00000263642,9606.ENSP00000264657,9606.ENSP00000264832,9606.ENSP00000289902,9606.ENSP00000293288,9606.ENSP00000293379,9606.ENSP00000296140,…	CD74,CD4,TGFB1,SERPINE1,C1QBP,LRP1,IRF1,C3,TRAF2,TICAM1,TLR2,PDGFRB,IFIH1,STAT3,ICAM1,FCER1G,BAX,ITGA5,CCR1,IL15,STAT6,AXL,C3AR1,IL16,CD14,CEBPB,FOS,CMKLR1,CD276,JAK1,TNFSF13,FYN,FN1,CASP8,TFRC,STAT1,TLR1,IFNGR1,IFI16,MAP3K7,NFKB2,BCL10,CD40,TLR4,KLF4,TNFRSF1B,HLA-E,ANXA1,CYBB,ISG15,DDX58,IL6ST,JAK2,HLA-A,IRF7,ITGB2,BCL6,IFITM1,IL1R1,CXCR4,NFATC4,HLA-DPA1,MYD88,INPP5D,HLA-DPB1,PTPRC,HLA-G,MME,CD2…
GO:0016032	viral process	52	776	0.89	3.14e-28	9606.ENSP00000011653,9606.ENSP00000162749,9606.ENSP00000216797,9606.ENSP00000225698,9606.ENSP00000225831,9606.ENSP00000228918,9606.ENSP00000248244,9606.ENSP00000263642,9606.ENSP00000264657,9606.ENSP00000264832,9606.ENSP00000269305,9606.ENSP00000293288,9606.ENSP00000293379,9606.ENSP00000301178,9606.ENSP00000302935,9606.ENSP00000315768,9606.ENSP00000341141,9606.ENSP00000346206,9606.ENSP00000346437,…	CD4,TNFRSF1A,NFKBIA,C1QBP,CCL2,LTBR,TICAM1,IFIH1,STAT3,ICAM1,TP53,BAX,ITGA5,AXL,IL16,STAT2,SIGLEC1,TAP1,ATG7,FYN,ITGAL,CASP8,PSMB10,TFRC,DPP4,STAT1,MAP3K7,IFIT1,IL2RG,C1QA,PSMB9,PSMB8,TAP2,HLA-C,HLA-E,ISG15,DDX58,RPS6,IL6ST,TANK,HLA-DRA,HLA-A,IRF7,CXCR4,HLA-B,PTPRC,IKBKB,HCK,ITGB3,MRC1,IFI27,IKBKG
GO:0002694	regulation of leukocyte activation	45	530	0.99	5.44e-28	9606.ENSP00000009530,9606.ENSP00000011653,9606.ENSP00000221930,9606.ENSP00000225831,9606.ENSP00000245414,9606.ENSP00000248244,9606.ENSP00000259607,9606.ENSP00000284240,9606.ENSP00000289902,9606.ENSP00000294728,9606.ENSP00000295408,9606.ENSP00000296545,9606.ENSP00000300134,9606.ENSP00000301178,9606.ENSP00000302935,9606.ENSP00000305422,9606.ENSP00000312367,9606.ENSP00000320084,9606.ENSP00000343505,…	CD74,CD4,TGFB1,CCL2,IRF1,TICAM1,CCL21,THY1,FCER1G,VCAM1,MERTK,IL15,STAT6,AXL,IL16,CEBPB,CD84,CD276,TNFSF13,FYN,TFRC,DPP4,CD47,BCL10,CD40,TLR4,TNFRSF1B,HLA-E,ANXA1,IL6ST,NFATC2,HLA-A,ITGB2,BCL6,CDKN1A,HLA-DPA1,HLA-DMB,INPP5D,HLA-DPB1,PTPRC,HLA-G,CD200,FLT3LG,CCL5,TNFAIP3
GO:0080134	regulation of response to stress	66	1437	0.72	7.29e-28	9606.ENSP00000009530,9606.ENSP00000162749,9606.ENSP00000216797,9606.ENSP00000223095,9606.ENSP00000225698,9606.ENSP00000228918,9606.ENSP00000243077,9606.ENSP00000245414,9606.ENSP00000245907,9606.ENSP00000247668,9606.ENSP00000248244,9606.ENSP00000259607,9606.ENSP00000260010,9606.ENSP00000262510,9606.ENSP00000264657,9606.ENSP00000269305,9606.ENSP00000278407,9606.ENSP00000284240,9606.ENSP00000289902,…	CD74,TNFRSF1A,NFKBIA,SERPINE1,C1QBP,LTBR,LRP1,IRF1,C3,TRAF2,TICAM1,CCL21,TLR2,NLRC5,STAT3,TP53,SERPING1,THY1,FCER1G,BAX,IL15,IL16,CEBPB,A2M,JAK1,IFNAR2,ATG7,FYN,PSMB10,PIK3CG,STAT1,SBNO2,CD47,IFNGR1,IFI16,MCL1,MAP3K7,BCL10,IFIT1,TLR4,KLF4,PSMB9,PSMB8,HLA-E,ANXA1,DDX58,IL6ST,JAK2,HLA-A,IRF7,BCL6,IL1R1,CXCR4,HLA-B,MYD88,PTPRC,HLA-G,ICAM2,IKBKB,CASP1,HCK,TRAF3,CCL5,ABCB1,TNFAIP3,IKBKG
GO:0002696	positive regulation of leukocyte activation	38	332	1.12	1.53e-27	9606.ENSP00000009530,9606.ENSP00000011653,9606.ENSP00000221930,9606.ENSP00000225831,9606.ENSP00000248244,9606.ENSP00000259607,9606.ENSP00000284240,9606.ENSP00000289902,9606.ENSP00000294728,9606.ENSP00000296545,9606.ENSP00000300134,9606.ENSP00000301178,9606.ENSP00000302935,9606.ENSP00000320084,9606.ENSP00000343505,9606.ENSP00000346671,9606.ENSP00000353224,9606.ENSP00000353731,9606.ENSP00000355361,…	CD74,CD4,TGFB1,CCL2,TICAM1,CCL21,THY1,FCER1G,VCAM1,IL15,STAT6,AXL,IL16,CD276,TNFSF13,FYN,TFRC,DPP4,CD47,BCL10,CD40,TLR4,HLA-E,ANXA1,IL6ST,NFATC2,HLA-A,ITGB2,BCL6,CDKN1A,HLA-DPA1,HLA-DMB,INPP5D,HLA-DPB1,PTPRC,HLA-G,FLT3LG,CCL5
GO:0051239	regulation of multicellular organismal process	93	3227	0.52	5.45e-27	9606.ENSP00000009530,9606.ENSP00000011653,9606.ENSP00000162749,9606.ENSP00000216797,9606.ENSP00000221930,9606.ENSP00000223095,9606.ENSP00000225698,9606.ENSP00000243077,9606.ENSP00000245414,9606.ENSP00000245907,9606.ENSP00000247668,9606.ENSP00000248244,9606.ENSP00000252593,9606.ENSP00000260010,9606.ENSP00000261799,9606.ENSP00000262510,9606.ENSP00000263642,9606.ENSP00000264657,9606.ENSP00000264832,…	CD74,CD4,TNFRSF1A,NFKBIA,TGFB1,SERPINE1,C1QBP,LRP1,IRF1,C3,TRAF2,TICAM1,BST2,TLR2,PDGFRB,NLRC5,IFIH1,STAT3,ICAM1,TP53,SERPING1,DUSP6,THY1,FCER1G,BAX,ITGA5,MERTK,CCR1,IL15,STAT6,AXL,C3AR1,IL16,CD14,COL3A1,CEBPB,FOS,CMKLR1,CD84,CD276,JAK1,TNFSF13,FYN,FN1,CASP8,PSMB10,PIK3CG,TFRC,STAT1,TLR1,CD47,IFNGR1,IFI16,MAP3K7,NFKB2,BCL10,CD40,TLR4,KLF4,PSMB9,PSMB8,TNFRSF1B,HLA-E,ANXA1,CYBB,ISG15,DDX58,IL6ST,JA…
GO:0050789	regulation of biological process	163	11475	0.21	1.26e-26	9606.ENSP00000009530,9606.ENSP00000011653,9606.ENSP00000162749,9606.ENSP00000216797,9606.ENSP00000221930,9606.ENSP00000223095,9606.ENSP00000225698,9606.ENSP00000225831,9606.ENSP00000227752,9606.ENSP00000228918,9606.ENSP00000228928,9606.ENSP00000241261,9606.ENSP00000242786,9606.ENSP00000243077,9606.ENSP00000245414,9606.ENSP00000245907,9606.ENSP00000247668,9606.ENSP00000248244,9606.ENSP00000250092,…	CD74,CD4,TNFRSF1A,NFKBIA,TGFB1,SERPINE1,C1QBP,CCL2,IL10RA,LTBR,OAS3,TNFSF10,CD97,LRP1,IRF1,C3,TRAF2,TICAM1,CD68,BST2,CCL21,TLR2,PDGFRB,MSR1,NLRC5,ITGAE,IFIH1,CKLF,STAT3,ICAM1,F13A1,MFGE8,TP53,IFNAR1,ECSIT,CD53,FCGR2A,SERPING1,DUSP6,THY1,FCER1G,BAX,ITGA5,CXCL16,VCAM1,MERTK,CCR1,IL15,STAT6,AXL,C3AR1,IL16,CD14,COL3A1,CEBPB,FOS,CD164,CMKLR1,CD84,C1QB,STAT2,CD276,C7,A2M,RORC,MX2,JAK1,TNFSF13,IFNAR2,AN…
GO:0032103	positive regulation of response to external stimulus	43	511	0.99	1.72e-26	9606.ENSP00000009530,9606.ENSP00000162749,9606.ENSP00000216797,9606.ENSP00000221930,9606.ENSP00000223095,9606.ENSP00000225698,9606.ENSP00000243077,9606.ENSP00000245907,9606.ENSP00000248244,9606.ENSP00000259607,9606.ENSP00000260010,9606.ENSP00000261799,9606.ENSP00000262510,9606.ENSP00000264657,9606.ENSP00000289902,9606.ENSP00000296140,9606.ENSP00000296545,9606.ENSP00000302079,9606.ENSP00000302935,…	CD74,TNFRSF1A,NFKBIA,TGFB1,SERPINE1,C1QBP,LRP1,C3,TICAM1,CCL21,TLR2,PDGFRB,NLRC5,STAT3,FCER1G,CCR1,IL15,C3AR1,IL16,CEBPB,CMKLR1,FYN,PSMB10,PIK3CG,CD47,IFI16,MAP3K7,BCL10,TLR4,PSMB9,PSMB8,HLA-E,IL6ST,JAK2,IRF7,CXCR4,MYD88,HLA-G,ICAM2,IKBKB,HCK,CCL5,IKBKG
GO:0051251	positive regulation of lymphocyte activation	35	286	1.15	4.29e-26	9606.ENSP00000009530,9606.ENSP00000011653,9606.ENSP00000221930,9606.ENSP00000225831,9606.ENSP00000248244,9606.ENSP00000259607,9606.ENSP00000284240,9606.ENSP00000294728,9606.ENSP00000296545,9606.ENSP00000300134,9606.ENSP00000301178,9606.ENSP00000320084,9606.ENSP00000343505,9606.ENSP00000346671,9606.ENSP00000353224,9606.ENSP00000353731,9606.ENSP00000355361,9606.ENSP00000359612,9606.ENSP00000361359,…	CD74,CD4,TGFB1,CCL2,TICAM1,CCL21,THY1,VCAM1,IL15,STAT6,AXL,CD276,TNFSF13,FYN,TFRC,DPP4,CD47,BCL10,CD40,TLR4,HLA-E,ANXA1,IL6ST,NFATC2,HLA-A,BCL6,CDKN1A,HLA-DPA1,HLA-DMB,INPP5D,HLA-DPB1,PTPRC,HLA-G,FLT3LG,CCL5
GO:0071346	cellular response to interferon-gamma	29	161	1.32	1.49e-25	9606.ENSP00000225831,9606.ENSP00000228928,9606.ENSP00000245414,9606.ENSP00000259607,9606.ENSP00000260010,9606.ENSP00000264832,9606.ENSP00000269305,9606.ENSP00000294728,9606.ENSP00000343204,9606.ENSP00000354394,9606.ENSP00000355361,9606.ENSP00000356713,9606.ENSP00000363089,9606.ENSP00000365402,9606.ENSP00000365817,9606.ENSP00000371067,9606.ENSP00000377218,9606.ENSP00000378786,9606.ENSP00000379873,…	CCL2,OAS3,IRF1,CCL21,TLR2,ICAM1,TP53,VCAM1,JAK1,STAT1,CD47,IFNGR1,TLR4,HLA-C,HLA-E,JAK2,IRF2,HLA-DRA,HLA-A,IRF7,IFI30,HLA-DPA1,HLA-B,HLA-DPB1,HLA-G,CASP1,HCK,MRC1,CCL5
GO:0051249	regulation of lymphocyte activation	40	445	1.01	1.82e-25	9606.ENSP00000009530,9606.ENSP00000011653,9606.ENSP00000221930,9606.ENSP00000225831,9606.ENSP00000245414,9606.ENSP00000248244,9606.ENSP00000259607,9606.ENSP00000284240,9606.ENSP00000294728,9606.ENSP00000295408,9606.ENSP00000296545,9606.ENSP00000300134,9606.ENSP00000301178,9606.ENSP00000305422,9606.ENSP00000320084,9606.ENSP00000343505,9606.ENSP00000346671,9606.ENSP00000353224,9606.ENSP00000353731,…	CD74,CD4,TGFB1,CCL2,IRF1,TICAM1,CCL21,THY1,VCAM1,MERTK,IL15,STAT6,AXL,CEBPB,CD276,TNFSF13,FYN,TFRC,DPP4,CD47,BCL10,CD40,TLR4,TNFRSF1B,HLA-E,ANXA1,IL6ST,NFATC2,HLA-A,BCL6,CDKN1A,HLA-DPA1,HLA-DMB,INPP5D,HLA-DPB1,PTPRC,HLA-G,FLT3LG,CCL5,TNFAIP3
GO:0002253	activation of immune response	38	385	1.06	1.99e-25	9606.ENSP00000011653,9606.ENSP00000225698,9606.ENSP00000245907,9606.ENSP00000271450,9606.ENSP00000278407,9606.ENSP00000284240,9606.ENSP00000289902,9606.ENSP00000293288,9606.ENSP00000302079,9606.ENSP00000311733,9606.ENSP00000313967,9606.ENSP00000320084,9606.ENSP00000322061,9606.ENSP00000346671,9606.ENSP00000351314,9606.ENSP00000356946,9606.ENSP00000357113,9606.ENSP00000358335,9606.ENSP00000359612,…	CD4,C1QBP,C3,FCGR2A,SERPING1,THY1,FCER1G,BAX,C3AR1,CMKLR1,C1QB,CD276,C7,FYN,PSMB10,FCGR3A,IFI16,MAP3K7,BCL10,TLR4,C1QA,PSMB9,PSMB8,PIK3CD,HLA-DRA,NFATC2,HLA-A,C1S,HLA-DPA1,INPP5D,HLA-DPB1,PTPRC,ICAM2,CFB,IKBKB,C1R,HCK,IKBKG
GO:0009893	positive regulation of metabolic process	97	3893	0.46	9.86e-24	9606.ENSP00000009530,9606.ENSP00000011653,9606.ENSP00000162749,9606.ENSP00000216797,9606.ENSP00000221930,9606.ENSP00000223095,9606.ENSP00000225698,9606.ENSP00000225831,9606.ENSP00000228918,9606.ENSP00000241261,9606.ENSP00000243077,9606.ENSP00000245414,9606.ENSP00000245907,9606.ENSP00000247668,9606.ENSP00000248244,9606.ENSP00000259607,9606.ENSP00000260010,9606.ENSP00000261799,9606.ENSP00000262510,…	CD74,CD4,TNFRSF1A,NFKBIA,TGFB1,SERPINE1,C1QBP,CCL2,LTBR,TNFSF10,LRP1,IRF1,C3,TRAF2,TICAM1,CCL21,TLR2,PDGFRB,NLRC5,IFIH1,STAT3,ICAM1,TP53,DUSP6,FCER1G,BAX,ITGA5,MERTK,CCR1,IL15,STAT6,AXL,C3AR1,IL16,CD14,CEBPB,FOS,CMKLR1,STAT2,CD276,RORC,TNFSF13,ANP32B,ATG7,FYN,FN1,CASP8,PIK3CG,TFRC,STAT1,SBNO2,TLR1,IFNGR1,IFI16,MAP3K7,NFKB2,BCL10,CD40,CCND3,TLR4,KLF4,TNFRSF1B,HLA-E,ANXA1,PIK3CD,CYBB,DDX58,IL6ST,JA…
GO:0010604	positive regulation of macromolecule metabolic process	93	3600	0.47	1.89e-23	9606.ENSP00000009530,9606.ENSP00000011653,9606.ENSP00000162749,9606.ENSP00000216797,9606.ENSP00000221930,9606.ENSP00000223095,9606.ENSP00000225698,9606.ENSP00000225831,9606.ENSP00000228918,9606.ENSP00000241261,9606.ENSP00000243077,9606.ENSP00000245414,9606.ENSP00000245907,9606.ENSP00000247668,9606.ENSP00000248244,9606.ENSP00000259607,9606.ENSP00000260010,9606.ENSP00000261799,9606.ENSP00000262510,…	CD74,CD4,TNFRSF1A,NFKBIA,TGFB1,SERPINE1,C1QBP,CCL2,LTBR,TNFSF10,LRP1,IRF1,C3,TRAF2,TICAM1,CCL21,TLR2,PDGFRB,NLRC5,IFIH1,STAT3,ICAM1,TP53,DUSP6,FCER1G,BAX,ITGA5,CCR1,IL15,STAT6,C3AR1,IL16,CD14,CEBPB,FOS,STAT2,CD276,RORC,TNFSF13,ANP32B,ATG7,FYN,FN1,CASP8,PIK3CG,TFRC,STAT1,SBNO2,TLR1,IFNGR1,IFI16,MAP3K7,NFKB2,BCL10,CD40,CCND3,TLR4,KLF4,TNFRSF1B,HLA-E,ANXA1,PIK3CD,CYBB,DDX58,IL6ST,JAK2,TANK,IRF2,NFAT…
GO:0046649	lymphocyte activation	36	390	1.03	4.74e-23	9606.ENSP00000009530,9606.ENSP00000011653,9606.ENSP00000245414,9606.ENSP00000252593,9606.ENSP00000259607,9606.ENSP00000264657,9606.ENSP00000264832,9606.ENSP00000269305,9606.ENSP00000289902,9606.ENSP00000293288,9606.ENSP00000294728,9606.ENSP00000295408,9606.ENSP00000296545,9606.ENSP00000300134,9606.ENSP00000301178,9606.ENSP00000305422,9606.ENSP00000320084,9606.ENSP00000327025,9606.ENSP00000346671,…	CD74,CD4,IRF1,BST2,CCL21,STAT3,ICAM1,TP53,FCER1G,BAX,VCAM1,MERTK,IL15,STAT6,AXL,CEBPB,CD276,RORC,FYN,ITGAL,CASP8,PSMB10,PIK3CG,DPP4,CD40,CCND3,TLR4,HLA-E,ANXA1,PIK3CD,HLA-A,ITGB2,LCP1,BCL6,PTPRC,FLT3LG
GO:0010941	regulation of cell death	64	1696	0.64	2.45e-22	9606.ENSP00000009530,9606.ENSP00000162749,9606.ENSP00000216797,9606.ENSP00000223095,9606.ENSP00000225698,9606.ENSP00000225831,9606.ENSP00000228918,9606.ENSP00000241261,9606.ENSP00000243077,9606.ENSP00000247668,9606.ENSP00000259607,9606.ENSP00000261799,9606.ENSP00000264657,9606.ENSP00000264832,9606.ENSP00000269305,9606.ENSP00000279488,9606.ENSP00000289902,9606.ENSP00000293288,9606.ENSP00000293379,…	CD74,TNFRSF1A,NFKBIA,SERPINE1,C1QBP,CCL2,LTBR,TNFSF10,LRP1,TRAF2,CCL21,PDGFRB,STAT3,ICAM1,TP53,DUSP6,FCER1G,BAX,ITGA5,MERTK,AXL,CEBPB,FOS,RORC,ANP32B,ATG7,FYN,FN1,CASP8,PIK3CG,TFRC,STAT1,MCL1,BCL10,IFIT2,CD40,TLR4,C1QA,KLF4,TNFRSF1B,ANXA1,PIK3CD,RPS6,IL6ST,JAK2,IRF7,ITGB2,BCL6,CDKN1A,CXCR4,NFATC4,MYD88,INPP5D,PTPRC,HLA-G,CD200,IKBKB,CASP1,HCK,TRAF3,FLT3LG,CCL5,TNFAIP3,IKBKG
GO:0060333	interferon-gamma-mediated signaling pathway	21	70	1.54	4.22e-22	9606.ENSP00000228928,9606.ENSP00000245414,9606.ENSP00000264832,9606.ENSP00000269305,9606.ENSP00000294728,9606.ENSP00000343204,9606.ENSP00000354394,9606.ENSP00000356713,9606.ENSP00000365402,9606.ENSP00000365817,9606.ENSP00000371067,9606.ENSP00000377218,9606.ENSP00000378786,9606.ENSP00000379873,9606.ENSP00000380697,9606.ENSP00000384886,9606.ENSP00000393566,9606.ENSP00000399168,9606.ENSP00000408146,…	OAS3,IRF1,ICAM1,TP53,VCAM1,JAK1,STAT1,IFNGR1,HLA-C,HLA-E,JAK2,IRF2,HLA-DRA,HLA-A,IRF7,IFI30,HLA-DPA1,HLA-B,HLA-DPB1,HLA-G,HCK
GO:0050794	regulation of cellular process	155	10932	0.21	1.51e-21	9606.ENSP00000009530,9606.ENSP00000011653,9606.ENSP00000162749,9606.ENSP00000216797,9606.ENSP00000221930,9606.ENSP00000223095,9606.ENSP00000225698,9606.ENSP00000225831,9606.ENSP00000227752,9606.ENSP00000228918,9606.ENSP00000228928,9606.ENSP00000241261,9606.ENSP00000242786,9606.ENSP00000243077,9606.ENSP00000245414,9606.ENSP00000245907,9606.ENSP00000247668,9606.ENSP00000248244,9606.ENSP00000252593,…	CD74,CD4,TNFRSF1A,NFKBIA,TGFB1,SERPINE1,C1QBP,CCL2,IL10RA,LTBR,OAS3,TNFSF10,CD97,LRP1,IRF1,C3,TRAF2,TICAM1,BST2,CCL21,TLR2,PDGFRB,MSR1,NLRC5,ITGAE,IFIH1,CKLF,STAT3,ICAM1,F13A1,MFGE8,TP53,IFNAR1,CD53,FCGR2A,SERPING1,DUSP6,THY1,FCER1G,BAX,ITGA5,CXCL16,VCAM1,MERTK,CCR1,IL15,STAT6,AXL,C3AR1,IL16,CD14,COL3A1,CEBPB,FOS,CD164,CMKLR1,CD84,STAT2,CD276,A2M,RORC,MX2,JAK1,TNFSF13,IFNAR2,ANP32B,ATG7,FYN,FN1,I…
GO:0070663	regulation of leukocyte proliferation	29	237	1.15	2.53e-21	9606.ENSP00000009530,9606.ENSP00000011653,9606.ENSP00000245414,9606.ENSP00000248244,9606.ENSP00000252593,9606.ENSP00000294728,9606.ENSP00000296545,9606.ENSP00000305422,9606.ENSP00000320084,9606.ENSP00000353224,9606.ENSP00000361359,9606.ENSP00000363089,9606.ENSP00000365435,9606.ENSP00000365817,9606.ENSP00000366109,9606.ENSP00000370698,9606.ENSP00000379330,9606.ENSP00000379873,9606.ENSP00000384371,…	CD74,CD4,IRF1,TICAM1,BST2,VCAM1,IL15,CEBPB,CD276,TFRC,CD40,TLR4,TNFRSF1B,HLA-E,ANXA1,IL6ST,NFATC2,HLA-A,BCL6,CDKN1A,HLA-DPA1,HLA-DMB,INPP5D,HLA-DPB1,PTPRC,HLA-G,FLT3LG,CCL5,TNFAIP3
GO:0060759	regulation of response to cytokine stimulus	26	175	1.23	7.08e-21	9606.ENSP00000009530,9606.ENSP00000162749,9606.ENSP00000247668,9606.ENSP00000260010,9606.ENSP00000262510,9606.ENSP00000263642,9606.ENSP00000301178,9606.ENSP00000343204,9606.ENSP00000343957,9606.ENSP00000351273,9606.ENSP00000354394,9606.ENSP00000356713,9606.ENSP00000363089,9606.ENSP00000363804,9606.ENSP00000369213,9606.ENSP00000370698,9606.ENSP00000371067,9606.ENSP00000380697,9606.ENSP00000386380,…	CD74,TNFRSF1A,TRAF2,TLR2,NLRC5,IFIH1,AXL,JAK1,IFNAR2,CASP8,STAT1,IFNGR1,TLR4,KLF4,DDX58,IL6ST,JAK2,IRF7,IL1R1,CXCR4,PTPRC,IKBKB,CASP1,CCL5,TNFAIP3,IKBKG
GO:0031349	positive regulation of defense response	33	367	1.01	1.18e-20	9606.ENSP00000162749,9606.ENSP00000216797,9606.ENSP00000223095,9606.ENSP00000245907,9606.ENSP00000248244,9606.ENSP00000260010,9606.ENSP00000262510,9606.ENSP00000264657,9606.ENSP00000289902,9606.ENSP00000296545,9606.ENSP00000302935,9606.ENSP00000305422,9606.ENSP00000346671,9606.ENSP00000351314,9606.ENSP00000352121,9606.ENSP00000355361,9606.ENSP00000357113,9606.ENSP00000358335,9606.ENSP00000359612,…	TNFRSF1A,NFKBIA,SERPINE1,C3,TICAM1,TLR2,NLRC5,STAT3,FCER1G,IL15,IL16,CEBPB,FYN,PSMB10,PIK3CG,CD47,IFI16,MAP3K7,BCL10,TLR4,PSMB9,PSMB8,HLA-E,IL6ST,JAK2,IRF7,MYD88,HLA-G,ICAM2,IKBKB,HCK,CCL5,IKBKG
GO:0002831	regulation of response to biotic stimulus	34	406	0.98	1.99e-20	9606.ENSP00000225698,9606.ENSP00000245414,9606.ENSP00000262510,9606.ENSP00000278407,9606.ENSP00000289902,9606.ENSP00000296545,9606.ENSP00000323929,9606.ENSP00000343204,9606.ENSP00000343957,9606.ENSP00000346671,9606.ENSP00000351314,9606.ENSP00000354394,9606.ENSP00000356713,9606.ENSP00000357113,9606.ENSP00000358335,9606.ENSP00000359612,9606.ENSP00000360869,9606.ENSP00000363089,9606.ENSP00000363993,…	C1QBP,IRF1,NLRC5,SERPING1,FCER1G,IL15,A2M,JAK1,IFNAR2,FYN,PSMB10,STAT1,IFNGR1,IFI16,MAP3K7,BCL10,IFIT1,TLR4,PSMB9,PSMB8,HLA-E,DDX58,JAK2,HLA-A,IRF7,HLA-B,HLA-G,ICAM2,IKBKB,HCK,TRAF3,CCL5,TNFAIP3,IKBKG
GO:0009617	response to bacterium	40	634	0.86	3.58e-20	9606.ENSP00000011653,9606.ENSP00000162749,9606.ENSP00000216797,9606.ENSP00000221930,9606.ENSP00000223095,9606.ENSP00000225831,9606.ENSP00000227752,9606.ENSP00000245907,9606.ENSP00000248244,9606.ENSP00000250092,9606.ENSP00000260010,9606.ENSP00000262510,9606.ENSP00000264832,9606.ENSP00000270139,9606.ENSP00000289902,9606.ENSP00000301178,9606.ENSP00000304236,9606.ENSP00000305422,9606.ENSP00000306245,…	CD4,TNFRSF1A,NFKBIA,TGFB1,SERPINE1,CCL2,IL10RA,C3,TICAM1,CD68,TLR2,NLRC5,ICAM1,IFNAR1,FCER1G,AXL,CD14,CEBPB,FOS,CASP8,SBNO2,TLR1,CD47,NFKB2,BCL10,CD40,TLR4,TNFRSF1B,HLA-E,ISG15,JAK2,HLA-A,CSF2RB,HLA-B,MYD88,CASP1,HCK,MRC1,CCL5,TNFAIP3
GO:0002683	negative regulation of immune system process	35	450	0.95	4.03e-20	9606.ENSP00000009530,9606.ENSP00000216797,9606.ENSP00000221930,9606.ENSP00000225698,9606.ENSP00000225831,9606.ENSP00000245414,9606.ENSP00000250092,9606.ENSP00000252593,9606.ENSP00000259607,9606.ENSP00000262510,9606.ENSP00000278407,9606.ENSP00000284240,9606.ENSP00000289902,9606.ENSP00000295408,9606.ENSP00000300134,9606.ENSP00000301178,9606.ENSP00000304408,9606.ENSP00000305422,9606.ENSP00000312367,…	CD74,NFKBIA,TGFB1,C1QBP,CCL2,IRF1,CD68,BST2,CCL21,NLRC5,SERPING1,THY1,FCER1G,MERTK,STAT6,AXL,COL3A1,CEBPB,CD84,A2M,DPP4,CD47,IFI16,BCL10,TLR4,HLA-E,ANXA1,HLA-A,BCL6,HLA-B,INPP5D,PTPRC,HLA-G,CD200,TNFAIP3
GO:0009615	response to virus	30	293	1.07	4.14e-20	9606.ENSP00000228928,9606.ENSP00000245414,9606.ENSP00000248244,9606.ENSP00000252593,9606.ENSP00000262510,9606.ENSP00000263642,9606.ENSP00000270139,9606.ENSP00000315768,9606.ENSP00000333657,9606.ENSP00000343957,9606.ENSP00000346437,9606.ENSP00000354394,9606.ENSP00000356713,9606.ENSP00000357113,9606.ENSP00000360869,9606.ENSP00000360891,9606.ENSP00000361359,9606.ENSP00000368699,9606.ENSP00000369213,…	OAS3,IRF1,TICAM1,BST2,NLRC5,IFIH1,IFNAR1,STAT2,MX2,IFNAR2,ATG7,STAT1,IFNGR1,IFI16,IFIT1,IFIT2,CD40,ISG15,DDX58,IRF2,IRF7,MX1,IFITM1,CXCR4,PTPRC,IKBKB,CCL5,IFI27,IKBKG,IFITM2
GO:0050670	regulation of lymphocyte proliferation	27	218	1.15	6.76e-20	9606.ENSP00000009530,9606.ENSP00000011653,9606.ENSP00000245414,9606.ENSP00000248244,9606.ENSP00000294728,9606.ENSP00000296545,9606.ENSP00000305422,9606.ENSP00000320084,9606.ENSP00000353224,9606.ENSP00000361359,9606.ENSP00000363089,9606.ENSP00000365435,9606.ENSP00000365817,9606.ENSP00000366109,9606.ENSP00000370698,9606.ENSP00000379330,9606.ENSP00000379873,9606.ENSP00000384371,9606.ENSP00000384849,…	CD74,CD4,IRF1,TICAM1,VCAM1,IL15,CEBPB,CD276,TFRC,CD40,TLR4,TNFRSF1B,HLA-E,ANXA1,IL6ST,NFATC2,HLA-A,BCL6,CDKN1A,HLA-DPA1,HLA-DMB,INPP5D,HLA-DPB1,PTPRC,HLA-G,FLT3LG,CCL5
GO:0009967	positive regulation of signal transduction	60	1654	0.62	7.56e-20	9606.ENSP00000009530,9606.ENSP00000011653,9606.ENSP00000162749,9606.ENSP00000221930,9606.ENSP00000225698,9606.ENSP00000225831,9606.ENSP00000227752,9606.ENSP00000228918,9606.ENSP00000241261,9606.ENSP00000243077,9606.ENSP00000245907,9606.ENSP00000247668,9606.ENSP00000248244,9606.ENSP00000252593,9606.ENSP00000259607,9606.ENSP00000260010,9606.ENSP00000261799,9606.ENSP00000262510,9606.ENSP00000264657,…	CD74,CD4,TNFRSF1A,TGFB1,C1QBP,CCL2,IL10RA,LTBR,TNFSF10,LRP1,C3,TRAF2,TICAM1,BST2,CCL21,TLR2,PDGFRB,NLRC5,STAT3,ICAM1,TP53,DUSP6,BAX,ITGA5,CCR1,IL15,AXL,CD14,COL3A1,FYN,CASP8,PSMB10,PIK3CG,TFRC,TLR1,MCL1,MAP3K7,BCL10,CD40,TLR4,PSMB9,PSMB8,PIK3CD,IL6ST,JAK2,IRF7,MAP3K1,IL1R1,CXCR4,NFATC4,MYD88,PTPRC,IKBKB,CASP1,ITGB3,TRAF3,PECAM1,CCL5,TNFAIP3,IKBKG
GO:0002768	immune response-regulating cell surface receptor signaling pathway	31	346	1.01	2.78e-19	9606.ENSP00000011653,9606.ENSP00000271450,9606.ENSP00000284240,9606.ENSP00000289902,9606.ENSP00000293288,9606.ENSP00000302079,9606.ENSP00000306245,9606.ENSP00000311733,9606.ENSP00000320084,9606.ENSP00000346671,9606.ENSP00000351314,9606.ENSP00000356946,9606.ENSP00000358335,9606.ENSP00000359612,9606.ENSP00000361359,9606.ENSP00000363993,9606.ENSP00000364016,9606.ENSP00000366563,9606.ENSP00000378786,…	CD4,FCGR2A,THY1,FCER1G,BAX,C3AR1,FOS,CMKLR1,CD276,FYN,PSMB10,FCGR3A,MAP3K7,BCL10,CD40,PSMB9,PSMB8,PIK3CD,HLA-DRA,NFATC2,HLA-A,MAP3K1,HLA-DPA1,INPP5D,HLA-DPB1,PTPRC,HLA-G,ICAM2,IKBKB,HCK,IKBKG
GO:0035556	intracellular signal transduction	60	1712	0.61	3.87e-19	9606.ENSP00000162749,9606.ENSP00000216797,9606.ENSP00000221930,9606.ENSP00000225698,9606.ENSP00000225831,9606.ENSP00000242786,9606.ENSP00000247668,9606.ENSP00000248244,9606.ENSP00000260010,9606.ENSP00000261799,9606.ENSP00000262510,9606.ENSP00000263642,9606.ENSP00000269305,9606.ENSP00000279488,9606.ENSP00000293288,9606.ENSP00000294728,9606.ENSP00000295408,9606.ENSP00000296140,9606.ENSP00000301178,…	TNFRSF1A,NFKBIA,TGFB1,C1QBP,CCL2,CD97,TRAF2,TICAM1,TLR2,PDGFRB,NLRC5,IFIH1,TP53,DUSP6,BAX,VCAM1,MERTK,CCR1,AXL,CD14,CEBPB,JAK1,FYN,CASP8,PSMB10,PIK3CG,TFRC,IFI16,MCL1,MAP3K7,NFKB2,BCL10,CD40,TLR4,IL2RG,PSMB9,PSMB8,TNFRSF1B,PIK3CD,DDX58,RPS6,JAK2,TANK,NFATC2,IRF7,LCP1,MAP3K1,CSF2RB,BCL6,CDKN1A,CXCR4,NFATC4,INPP5D,PTPRC,IKBKB,PECAM1,FLT3LG,CCL5,TNFAIP3,IKBKG
GO:0002221	pattern recognition receptor signaling pathway	22	125	1.31	6.48e-19	9606.ENSP00000216797,9606.ENSP00000248244,9606.ENSP00000260010,9606.ENSP00000263642,9606.ENSP00000304236,9606.ENSP00000351273,9606.ENSP00000354932,9606.ENSP00000357981,9606.ENSP00000358335,9606.ENSP00000359612,9606.ENSP00000361359,9606.ENSP00000363089,9606.ENSP00000369213,9606.ENSP00000376505,9606.ENSP00000380697,9606.ENSP00000380948,9606.ENSP00000382423,9606.ENSP00000401399,9606.ENSP00000430684,…	NFKBIA,TICAM1,TLR2,IFIH1,CD14,CASP8,TLR1,CTSS,MAP3K7,BCL10,CD40,TLR4,DDX58,TANK,IRF7,ITGB2,MAP3K1,MYD88,IKBKB,TRAF3,TNFAIP3,IKBKG
GO:0070665	positive regulation of leukocyte proliferation	23	146	1.26	7.15e-19	9606.ENSP00000009530,9606.ENSP00000011653,9606.ENSP00000248244,9606.ENSP00000252593,9606.ENSP00000294728,9606.ENSP00000296545,9606.ENSP00000320084,9606.ENSP00000353224,9606.ENSP00000361359,9606.ENSP00000363089,9606.ENSP00000365817,9606.ENSP00000366109,9606.ENSP00000370698,9606.ENSP00000379330,9606.ENSP00000379873,9606.ENSP00000384371,9606.ENSP00000384849,9606.ENSP00000393566,9606.ENSP00000398890,…	CD74,CD4,TICAM1,BST2,VCAM1,IL15,CD276,TFRC,CD40,TLR4,HLA-E,ANXA1,IL6ST,NFATC2,HLA-A,BCL6,CDKN1A,HLA-DPA1,HLA-DMB,HLA-DPB1,PTPRC,FLT3LG,CCL5
GO:0042110	T cell activation	27	243	1.11	8.14e-19	9606.ENSP00000009530,9606.ENSP00000011653,9606.ENSP00000245414,9606.ENSP00000259607,9606.ENSP00000264657,9606.ENSP00000264832,9606.ENSP00000269305,9606.ENSP00000289902,9606.ENSP00000293288,9606.ENSP00000296545,9606.ENSP00000300134,9606.ENSP00000305422,9606.ENSP00000320084,9606.ENSP00000327025,9606.ENSP00000346671,9606.ENSP00000349252,9606.ENSP00000351273,9606.ENSP00000351314,9606.ENSP00000352121,…	CD74,CD4,IRF1,CCL21,STAT3,ICAM1,TP53,FCER1G,BAX,IL15,STAT6,CEBPB,CD276,RORC,FYN,ITGAL,CASP8,PSMB10,PIK3CG,DPP4,CCND3,HLA-E,ANXA1,PIK3CD,HLA-A,LCP1,PTPRC
GO:0002237	response to molecule of bacterial origin	30	330	1.02	8.46e-19	9606.ENSP00000216797,9606.ENSP00000221930,9606.ENSP00000223095,9606.ENSP00000225831,9606.ENSP00000227752,9606.ENSP00000248244,9606.ENSP00000250092,9606.ENSP00000260010,9606.ENSP00000264832,9606.ENSP00000270139,9606.ENSP00000301178,9606.ENSP00000304236,9606.ENSP00000305422,9606.ENSP00000306245,9606.ENSP00000351273,9606.ENSP00000354733,9606.ENSP00000354932,9606.ENSP00000358983,9606.ENSP00000359612,…	NFKBIA,TGFB1,SERPINE1,CCL2,IL10RA,TICAM1,CD68,TLR2,ICAM1,IFNAR1,AXL,CD14,CEBPB,FOS,CASP8,SBNO2,TLR1,NFKB2,BCL10,CD40,TLR4,TNFRSF1B,JAK2,CSF2RB,MYD88,CASP1,HCK,MRC1,CCL5,TNFAIP3
GO:0045088	regulation of innate immune response	29	301	1.04	9.22e-19	9606.ENSP00000245414,9606.ENSP00000262510,9606.ENSP00000278407,9606.ENSP00000289902,9606.ENSP00000323929,9606.ENSP00000343204,9606.ENSP00000343957,9606.ENSP00000346671,9606.ENSP00000351314,9606.ENSP00000354394,9606.ENSP00000356713,9606.ENSP00000357113,9606.ENSP00000358335,9606.ENSP00000359612,9606.ENSP00000363089,9606.ENSP00000363993,9606.ENSP00000364016,9606.ENSP00000365817,9606.ENSP00000371067,…	IRF1,NLRC5,SERPING1,FCER1G,A2M,JAK1,IFNAR2,FYN,PSMB10,STAT1,IFNGR1,IFI16,MAP3K7,BCL10,TLR4,PSMB9,PSMB8,HLA-E,JAK2,HLA-A,IRF7,HLA-B,HLA-G,ICAM2,IKBKB,HCK,CCL5,TNFAIP3,IKBKG
GO:0043067	regulation of programmed cell death	57	1569	0.62	1.02e-18	9606.ENSP00000009530,9606.ENSP00000162749,9606.ENSP00000216797,9606.ENSP00000223095,9606.ENSP00000225698,9606.ENSP00000225831,9606.ENSP00000228918,9606.ENSP00000241261,9606.ENSP00000243077,9606.ENSP00000247668,9606.ENSP00000259607,9606.ENSP00000261799,9606.ENSP00000264832,9606.ENSP00000269305,9606.ENSP00000279488,9606.ENSP00000289902,9606.ENSP00000293288,9606.ENSP00000293379,9606.ENSP00000295408,…	CD74,TNFRSF1A,NFKBIA,SERPINE1,C1QBP,CCL2,LTBR,TNFSF10,LRP1,TRAF2,CCL21,PDGFRB,ICAM1,TP53,DUSP6,FCER1G,BAX,ITGA5,MERTK,AXL,CEBPB,RORC,ANP32B,ATG7,FYN,FN1,CASP8,PIK3CG,TFRC,STAT1,MCL1,BCL10,IFIT2,CD40,KLF4,TNFRSF1B,ANXA1,PIK3CD,RPS6,IL6ST,JAK2,IRF7,BCL6,CDKN1A,CXCR4,NFATC4,MYD88,INPP5D,PTPRC,HLA-G,IKBKB,CASP1,HCK,TRAF3,FLT3LG,CCL5,TNFAIP3
GO:0010647	positive regulation of cell communication	61	1823	0.59	1.4e-18	9606.ENSP00000009530,9606.ENSP00000011653,9606.ENSP00000162749,9606.ENSP00000221930,9606.ENSP00000225698,9606.ENSP00000225831,9606.ENSP00000227752,9606.ENSP00000228918,9606.ENSP00000241261,9606.ENSP00000243077,9606.ENSP00000245907,9606.ENSP00000247668,9606.ENSP00000248244,9606.ENSP00000252593,9606.ENSP00000259607,9606.ENSP00000260010,9606.ENSP00000261799,9606.ENSP00000262510,9606.ENSP00000264657,…	CD74,CD4,TNFRSF1A,TGFB1,C1QBP,CCL2,IL10RA,LTBR,TNFSF10,LRP1,C3,TRAF2,TICAM1,BST2,CCL21,TLR2,PDGFRB,NLRC5,STAT3,ICAM1,TP53,DUSP6,BAX,ITGA5,CCR1,IL15,AXL,CD14,COL3A1,FYN,CASP8,PSMB10,PIK3CG,TFRC,TLR1,MCL1,MAP3K7,BCL10,CD40,TLR4,PSMB9,PSMB8,PIK3CD,IL6ST,JAK2,IRF7,MAP3K1,IL1R1,CXCR4,NFATC4,MYD88,PTPRC,MME,IKBKB,CASP1,ITGB3,TRAF3,PECAM1,CCL5,TNFAIP3,IKBKG
GO:0030155	regulation of cell adhesion	40	712	0.81	1.58e-18	9606.ENSP00000009530,9606.ENSP00000011653,9606.ENSP00000221930,9606.ENSP00000223095,9606.ENSP00000225698,9606.ENSP00000225831,9606.ENSP00000243077,9606.ENSP00000245414,9606.ENSP00000259607,9606.ENSP00000264832,9606.ENSP00000284240,9606.ENSP00000293379,9606.ENSP00000294728,9606.ENSP00000296545,9606.ENSP00000305422,9606.ENSP00000309376,9606.ENSP00000320084,9606.ENSP00000343204,9606.ENSP00000346671,…	CD74,CD4,TGFB1,SERPINE1,C1QBP,CCL2,LRP1,IRF1,CCL21,ICAM1,THY1,ITGA5,VCAM1,IL15,CEBPB,CD164,CD276,JAK1,FYN,FN1,PIK3CG,TFRC,DPP4,CD47,BCL10,KLF4,HLA-E,ANXA1,IL6ST,JAK2,HLA-A,ITGB2,BCL6,CXCR4,HLA-DPA1,HLA-DMB,HLA-DPB1,PTPRC,HLA-G,CCL5
GO:0023056	positive regulation of signaling	61	1831	0.58	1.7e-18	9606.ENSP00000009530,9606.ENSP00000011653,9606.ENSP00000162749,9606.ENSP00000221930,9606.ENSP00000225698,9606.ENSP00000225831,9606.ENSP00000227752,9606.ENSP00000228918,9606.ENSP00000241261,9606.ENSP00000243077,9606.ENSP00000245907,9606.ENSP00000247668,9606.ENSP00000248244,9606.ENSP00000252593,9606.ENSP00000259607,9606.ENSP00000260010,9606.ENSP00000261799,9606.ENSP00000262510,9606.ENSP00000264657,…	CD74,CD4,TNFRSF1A,TGFB1,C1QBP,CCL2,IL10RA,LTBR,TNFSF10,LRP1,C3,TRAF2,TICAM1,BST2,CCL21,TLR2,PDGFRB,NLRC5,STAT3,ICAM1,TP53,DUSP6,BAX,ITGA5,CCR1,IL15,AXL,CD14,COL3A1,FYN,CASP8,PSMB10,PIK3CG,TFRC,TLR1,MCL1,MAP3K7,BCL10,CD40,TLR4,PSMB9,PSMB8,PIK3CD,IL6ST,JAK2,IRF7,MAP3K1,IL1R1,CXCR4,NFATC4,MYD88,PTPRC,MME,IKBKB,CASP1,ITGB3,TRAF3,PECAM1,CCL5,TNFAIP3,IKBKG
GO:0050671	positive regulation of lymphocyte proliferation	22	134	1.28	2.24e-18	9606.ENSP00000009530,9606.ENSP00000011653,9606.ENSP00000248244,9606.ENSP00000294728,9606.ENSP00000296545,9606.ENSP00000320084,9606.ENSP00000353224,9606.ENSP00000361359,9606.ENSP00000363089,9606.ENSP00000365817,9606.ENSP00000366109,9606.ENSP00000370698,9606.ENSP00000379330,9606.ENSP00000379873,9606.ENSP00000384371,9606.ENSP00000384849,9606.ENSP00000393566,9606.ENSP00000398890,9606.ENSP00000408146,…	CD74,CD4,TICAM1,VCAM1,IL15,CD276,TFRC,CD40,TLR4,HLA-E,ANXA1,IL6ST,NFATC2,HLA-A,BCL6,CDKN1A,HLA-DPA1,HLA-DMB,HLA-DPB1,PTPRC,FLT3LG,CCL5
GO:0032496	response to lipopolysaccharide	29	313	1.03	2.34e-18	9606.ENSP00000216797,9606.ENSP00000221930,9606.ENSP00000223095,9606.ENSP00000225831,9606.ENSP00000227752,9606.ENSP00000248244,9606.ENSP00000250092,9606.ENSP00000260010,9606.ENSP00000264832,9606.ENSP00000270139,9606.ENSP00000301178,9606.ENSP00000304236,9606.ENSP00000305422,9606.ENSP00000306245,9606.ENSP00000351273,9606.ENSP00000354733,9606.ENSP00000358983,9606.ENSP00000359612,9606.ENSP00000361359,…	NFKBIA,TGFB1,SERPINE1,CCL2,IL10RA,TICAM1,CD68,TLR2,ICAM1,IFNAR1,AXL,CD14,CEBPB,FOS,CASP8,SBNO2,NFKB2,BCL10,CD40,TLR4,TNFRSF1B,JAK2,CSF2RB,MYD88,CASP1,HCK,MRC1,CCL5,TNFAIP3
GO:1903039	positive regulation of leukocyte cell-cell adhesion	26	228	1.12	2.34e-18	9606.ENSP00000009530,9606.ENSP00000011653,9606.ENSP00000225831,9606.ENSP00000259607,9606.ENSP00000264832,9606.ENSP00000284240,9606.ENSP00000294728,9606.ENSP00000296545,9606.ENSP00000320084,9606.ENSP00000346671,9606.ENSP00000353224,9606.ENSP00000353731,9606.ENSP00000355361,9606.ENSP00000359612,9606.ENSP00000365817,9606.ENSP00000366109,9606.ENSP00000370698,9606.ENSP00000379873,9606.ENSP00000380948,…	CD74,CD4,CCL2,CCL21,ICAM1,THY1,VCAM1,IL15,CD276,FYN,TFRC,DPP4,CD47,BCL10,HLA-E,ANXA1,IL6ST,HLA-A,ITGB2,BCL6,HLA-DPA1,HLA-DMB,HLA-DPB1,PTPRC,HLA-G,CCL5
GO:1903037	regulation of leukocyte cell-cell adhesion	29	315	1.03	2.66e-18	9606.ENSP00000009530,9606.ENSP00000011653,9606.ENSP00000225831,9606.ENSP00000245414,9606.ENSP00000259607,9606.ENSP00000264832,9606.ENSP00000284240,9606.ENSP00000294728,9606.ENSP00000296545,9606.ENSP00000305422,9606.ENSP00000320084,9606.ENSP00000346671,9606.ENSP00000353224,9606.ENSP00000353731,9606.ENSP00000355361,9606.ENSP00000359612,9606.ENSP00000363804,9606.ENSP00000365817,9606.ENSP00000366109,…	CD74,CD4,CCL2,IRF1,CCL21,ICAM1,THY1,VCAM1,IL15,CEBPB,CD276,FYN,TFRC,DPP4,CD47,BCL10,KLF4,HLA-E,ANXA1,IL6ST,HLA-A,ITGB2,BCL6,HLA-DPA1,HLA-DMB,HLA-DPB1,PTPRC,HLA-G,CCL5
GO:0002443	leukocyte mediated immunity	38	641	0.83	2.84e-18	9606.ENSP00000009530,9606.ENSP00000225698,9606.ENSP00000242786,9606.ENSP00000245907,9606.ENSP00000250092,9606.ENSP00000252593,9606.ENSP00000260010,9606.ENSP00000264832,9606.ENSP00000271324,9606.ENSP00000271450,9606.ENSP00000278407,9606.ENSP00000289902,9606.ENSP00000302079,9606.ENSP00000304236,9606.ENSP00000313967,9606.ENSP00000322061,9606.ENSP00000346437,9606.ENSP00000349252,9606.ENSP00000352121,…	CD74,C1QBP,CD97,C3,CD68,BST2,TLR2,ICAM1,CD53,FCGR2A,SERPING1,FCER1G,C3AR1,CD14,C1QB,C7,ATG7,ITGAL,PIK3CG,CD47,CTSS,BCL10,C1QA,HLA-C,TNFRSF1B,PIK3CD,CYBB,HLA-A,IRF7,ITGB2,C1S,HLA-B,INPP5D,PTPRC,HLA-G,MME,C1R,PECAM1
GO:0050900	leukocyte migration	29	316	1.02	2.84e-18	9606.ENSP00000009530,9606.ENSP00000221930,9606.ENSP00000225831,9606.ENSP00000259607,9606.ENSP00000264001,9606.ENSP00000264832,9606.ENSP00000289902,9606.ENSP00000293379,9606.ENSP00000293778,9606.ENSP00000294728,9606.ENSP00000295408,9606.ENSP00000296140,9606.ENSP00000302935,9606.ENSP00000312367,9606.ENSP00000346671,9606.ENSP00000346839,9606.ENSP00000349252,9606.ENSP00000352121,9606.ENSP00000355361,…	CD74,TGFB1,CCL2,CCL21,CKLF,ICAM1,FCER1G,ITGA5,CXCL16,VCAM1,MERTK,CCR1,IL16,CD84,FYN,FN1,ITGAL,PIK3CG,CD47,ANXA1,PIK3CD,CD99,ITGB2,CXCR4,INPP5D,HCK,ITGB3,PECAM1,CCL5
GO:0042981	regulation of apoptotic process	56	1550	0.62	2.9e-18	9606.ENSP00000009530,9606.ENSP00000162749,9606.ENSP00000216797,9606.ENSP00000223095,9606.ENSP00000225698,9606.ENSP00000225831,9606.ENSP00000228918,9606.ENSP00000241261,9606.ENSP00000243077,9606.ENSP00000247668,9606.ENSP00000259607,9606.ENSP00000261799,9606.ENSP00000264832,9606.ENSP00000269305,9606.ENSP00000279488,9606.ENSP00000289902,9606.ENSP00000293288,9606.ENSP00000293379,9606.ENSP00000295408,…	CD74,TNFRSF1A,NFKBIA,SERPINE1,C1QBP,CCL2,LTBR,TNFSF10,LRP1,TRAF2,CCL21,PDGFRB,ICAM1,TP53,DUSP6,FCER1G,BAX,ITGA5,MERTK,AXL,CEBPB,RORC,ANP32B,ATG7,FYN,FN1,CASP8,PIK3CG,TFRC,STAT1,MCL1,BCL10,IFIT2,CD40,KLF4,TNFRSF1B,ANXA1,PIK3CD,RPS6,IL6ST,JAK2,IRF7,BCL6,CDKN1A,NFATC4,MYD88,INPP5D,PTPRC,HLA-G,IKBKB,CASP1,HCK,TRAF3,FLT3LG,CCL5,TNFAIP3
GO:0048519	negative regulation of biological process	105	5389	0.35	3.7e-18	9606.ENSP00000009530,9606.ENSP00000162749,9606.ENSP00000216797,9606.ENSP00000221930,9606.ENSP00000223095,9606.ENSP00000225698,9606.ENSP00000225831,9606.ENSP00000227752,9606.ENSP00000228928,9606.ENSP00000241261,9606.ENSP00000243077,9606.ENSP00000245414,9606.ENSP00000245907,9606.ENSP00000247668,9606.ENSP00000248244,9606.ENSP00000250092,9606.ENSP00000252593,9606.ENSP00000259607,9606.ENSP00000260010,…	CD74,TNFRSF1A,NFKBIA,TGFB1,SERPINE1,C1QBP,CCL2,IL10RA,OAS3,TNFSF10,LRP1,IRF1,C3,TRAF2,TICAM1,CD68,BST2,CCL21,TLR2,PDGFRB,MSR1,NLRC5,IFIH1,STAT3,ICAM1,TP53,SERPING1,DUSP6,THY1,FCER1G,BAX,ITGA5,MERTK,CCR1,IL15,STAT6,AXL,CD14,COL3A1,CEBPB,CD164,CMKLR1,CD84,A2M,RORC,ANP32B,ATG7,FYN,FN1,CASP8,PSMB10,PIK3CG,TFRC,DPP4,STAT1,SBNO2,CD47,IFNGR1,IFI16,MCL1,NFKB2,BCL10,IFIT1,CCND3,TLR4,KLF4,PSMB9,PSMB8,TNFRS…
GO:0060255	regulation of macromolecule metabolic process	115	6407	0.32	3.92e-18	9606.ENSP00000009530,9606.ENSP00000011653,9606.ENSP00000162749,9606.ENSP00000216797,9606.ENSP00000221930,9606.ENSP00000223095,9606.ENSP00000225698,9606.ENSP00000225831,9606.ENSP00000228918,9606.ENSP00000228928,9606.ENSP00000241261,9606.ENSP00000243077,9606.ENSP00000245414,9606.ENSP00000245907,9606.ENSP00000247668,9606.ENSP00000248244,9606.ENSP00000252593,9606.ENSP00000259607,9606.ENSP00000260010,…	CD74,CD4,TNFRSF1A,NFKBIA,TGFB1,SERPINE1,C1QBP,CCL2,LTBR,OAS3,TNFSF10,LRP1,IRF1,C3,TRAF2,TICAM1,BST2,CCL21,TLR2,PDGFRB,MSR1,NLRC5,IFIH1,STAT3,ICAM1,TP53,SERPING1,DUSP6,THY1,FCER1G,BAX,ITGA5,MERTK,CCR1,IL15,STAT6,AXL,C3AR1,IL16,CD14,CEBPB,FOS,CMKLR1,CD84,STAT2,CD276,A2M,RORC,TNFSF13,ANP32B,ATG7,FYN,FN1,CASP8,PSMB10,PIK3CG,TFRC,STAT1,SBNO2,TLR1,CD47,IFNGR1,IFI16,MAP3K7,NFKB2,BCL10,CD40,CCND3,TLR4,KL…
GO:0022407	regulation of cell-cell adhesion	32	424	0.94	5.48e-18	9606.ENSP00000009530,9606.ENSP00000011653,9606.ENSP00000221930,9606.ENSP00000225831,9606.ENSP00000245414,9606.ENSP00000259607,9606.ENSP00000264832,9606.ENSP00000284240,9606.ENSP00000294728,9606.ENSP00000296545,9606.ENSP00000305422,9606.ENSP00000320084,9606.ENSP00000343204,9606.ENSP00000346671,9606.ENSP00000353224,9606.ENSP00000353731,9606.ENSP00000355361,9606.ENSP00000359612,9606.ENSP00000363804,…	CD74,CD4,TGFB1,CCL2,IRF1,CCL21,ICAM1,THY1,VCAM1,IL15,CEBPB,CD276,JAK1,FYN,TFRC,DPP4,CD47,BCL10,KLF4,HLA-E,ANXA1,IL6ST,JAK2,HLA-A,ITGB2,BCL6,HLA-DPA1,HLA-DMB,HLA-DPB1,PTPRC,HLA-G,CCL5
GO:0002819	regulation of adaptive immune response	23	165	1.21	6.94e-18	9606.ENSP00000011653,9606.ENSP00000221930,9606.ENSP00000245414,9606.ENSP00000245907,9606.ENSP00000247668,9606.ENSP00000289902,9606.ENSP00000300134,9606.ENSP00000343505,9606.ENSP00000353224,9606.ENSP00000358335,9606.ENSP00000361359,9606.ENSP00000365435,9606.ENSP00000365817,9606.ENSP00000366109,9606.ENSP00000370698,9606.ENSP00000379873,9606.ENSP00000380697,9606.ENSP00000384371,9606.ENSP00000386380,…	CD4,TGFB1,IRF1,C3,TRAF2,FCER1G,STAT6,TNFSF13,TFRC,MAP3K7,CD40,TNFRSF1B,HLA-E,ANXA1,IL6ST,HLA-A,IRF7,BCL6,IL1R1,HLA-B,PTPRC,HLA-G,TNFAIP3
GO:0022409	positive regulation of cell-cell adhesion	27	272	1.06	9.72e-18	9606.ENSP00000009530,9606.ENSP00000011653,9606.ENSP00000225831,9606.ENSP00000259607,9606.ENSP00000264832,9606.ENSP00000284240,9606.ENSP00000294728,9606.ENSP00000296545,9606.ENSP00000320084,9606.ENSP00000343204,9606.ENSP00000346671,9606.ENSP00000353224,9606.ENSP00000353731,9606.ENSP00000355361,9606.ENSP00000359612,9606.ENSP00000365817,9606.ENSP00000366109,9606.ENSP00000370698,9606.ENSP00000379873,…	CD74,CD4,CCL2,CCL21,ICAM1,THY1,VCAM1,IL15,CD276,JAK1,FYN,TFRC,DPP4,CD47,BCL10,HLA-E,ANXA1,IL6ST,HLA-A,ITGB2,BCL6,HLA-DPA1,HLA-DMB,HLA-DPB1,PTPRC,HLA-G,CCL5
GO:0009966	regulation of signal transduction	78	3107	0.46	1.05e-17	9606.ENSP00000009530,9606.ENSP00000011653,9606.ENSP00000162749,9606.ENSP00000216797,9606.ENSP00000221930,9606.ENSP00000223095,9606.ENSP00000225698,9606.ENSP00000225831,9606.ENSP00000227752,9606.ENSP00000228918,9606.ENSP00000241261,9606.ENSP00000243077,9606.ENSP00000245414,9606.ENSP00000245907,9606.ENSP00000247668,9606.ENSP00000248244,9606.ENSP00000252593,9606.ENSP00000259607,9606.ENSP00000260010,…	CD74,CD4,TNFRSF1A,NFKBIA,TGFB1,SERPINE1,C1QBP,CCL2,IL10RA,LTBR,TNFSF10,LRP1,IRF1,C3,TRAF2,TICAM1,BST2,CCL21,TLR2,PDGFRB,NLRC5,STAT3,ICAM1,TP53,DUSP6,THY1,BAX,ITGA5,CCR1,IL15,AXL,CD14,COL3A1,CMKLR1,A2M,JAK1,IFNAR2,FYN,FN1,CASP8,PSMB10,PIK3CG,TFRC,STAT1,TLR1,CD47,IFNGR1,MCL1,MAP3K7,BCL10,CD40,CCND3,TLR4,KLF4,PSMB9,PSMB8,PIK3CD,IL6ST,JAK2,TANK,IRF7,MAP3K1,BCL6,IL1R1,CXCR4,NFATC4,MYD88,INPP5D,PTPRC,H…
GO:0032879	regulation of localization	73	2740	0.49	1.25e-17	9606.ENSP00000009530,9606.ENSP00000011653,9606.ENSP00000162749,9606.ENSP00000216797,9606.ENSP00000221930,9606.ENSP00000223095,9606.ENSP00000225698,9606.ENSP00000225831,9606.ENSP00000243077,9606.ENSP00000245907,9606.ENSP00000247668,9606.ENSP00000252593,9606.ENSP00000259607,9606.ENSP00000260010,9606.ENSP00000261799,9606.ENSP00000262101,9606.ENSP00000264657,9606.ENSP00000264832,9606.ENSP00000268150,…	CD74,CD4,TNFRSF1A,NFKBIA,TGFB1,SERPINE1,C1QBP,CCL2,LRP1,C3,TRAF2,BST2,CCL21,TLR2,PDGFRB,MSR1,STAT3,ICAM1,MFGE8,TP53,THY1,FCER1G,BAX,ITGA5,CXCL16,MERTK,CCR1,IL15,AXL,C3AR1,IL16,CD14,COL3A1,CEBPB,CMKLR1,CD84,MX2,ANP32B,FYN,FN1,CASP8,PIK3CG,TFRC,DPP4,CD47,CTSS,CD40,TLR4,IL2RG,KLF4,TNFRSF1B,HLA-E,ANXA1,PIK3CD,CYBB,DDX58,CD99,JAK2,IL15RA,ITGB2,LCP1,BCL6,IFITM1,IL1R1,CXCR4,PTPRC,CD200,HCK,ITGB3,PECAM1,…
GO:0002460	adaptive immune response based on somatic recombination of immune receptors built from immunoglobulin superfamily domains	22	148	1.23	1.31e-17	9606.ENSP00000009530,9606.ENSP00000225698,9606.ENSP00000245907,9606.ENSP00000264657,9606.ENSP00000264832,9606.ENSP00000278407,9606.ENSP00000289902,9606.ENSP00000300134,9606.ENSP00000313967,9606.ENSP00000322061,9606.ENSP00000327025,9606.ENSP00000358983,9606.ENSP00000359612,9606.ENSP00000363089,9606.ENSP00000363773,9606.ENSP00000379873,9606.ENSP00000380697,9606.ENSP00000384371,9606.ENSP00000385035,…	CD74,C1QBP,C3,STAT3,ICAM1,SERPING1,FCER1G,STAT6,C1QB,C7,RORC,NFKB2,BCL10,TLR4,C1QA,HLA-A,IRF7,BCL6,C1S,INPP5D,HLA-G,C1R
GO:0002478	antigen processing and presentation of exogenous peptide antigen	23	174	1.18	1.94e-17	9606.ENSP00000009530,9606.ENSP00000289902,9606.ENSP00000346206,9606.ENSP00000351314,9606.ENSP00000357981,9606.ENSP00000363976,9606.ENSP00000363993,9606.ENSP00000364016,9606.ENSP00000364034,9606.ENSP00000365402,9606.ENSP00000365817,9606.ENSP00000367851,9606.ENSP00000378786,9606.ENSP00000379873,9606.ENSP00000384886,9606.ENSP00000393566,9606.ENSP00000398890,9606.ENSP00000399168,9606.ENSP00000404833,…	CD74,FCER1G,TAP1,PSMB10,CTSS,HLA-DMA,PSMB9,PSMB8,TAP2,HLA-C,HLA-E,CYBB,HLA-DRA,HLA-A,IFI30,HLA-DPA1,HLA-DMB,HLA-B,TAPBP,HLA-DPB1,HLA-G,IKBKB,IKBKG
GO:0010628	positive regulation of gene expression	67	2337	0.52	2.11e-17	9606.ENSP00000009530,9606.ENSP00000011653,9606.ENSP00000162749,9606.ENSP00000216797,9606.ENSP00000221930,9606.ENSP00000223095,9606.ENSP00000225698,9606.ENSP00000243077,9606.ENSP00000245414,9606.ENSP00000245907,9606.ENSP00000247668,9606.ENSP00000248244,9606.ENSP00000260010,9606.ENSP00000262510,9606.ENSP00000263642,9606.ENSP00000264657,9606.ENSP00000269305,9606.ENSP00000289902,9606.ENSP00000296545,…	CD74,CD4,TNFRSF1A,NFKBIA,TGFB1,SERPINE1,C1QBP,LRP1,IRF1,C3,TRAF2,TICAM1,TLR2,NLRC5,IFIH1,STAT3,TP53,FCER1G,IL15,STAT6,C3AR1,IL16,CD14,CEBPB,FOS,STAT2,CD276,RORC,FN1,CASP8,TFRC,STAT1,SBNO2,TLR1,IFNGR1,IFI16,MAP3K7,NFKB2,BCL10,CD40,TLR4,KLF4,HLA-E,ANXA1,PIK3CD,CYBB,DDX58,IL6ST,JAK2,IRF2,NFATC2,HLA-A,IRF7,IL1R1,NFATC4,HLA-DPA1,MYD88,HLA-DPB1,PTPRC,HLA-G,CD200,IKBKB,IL32,CASP1,FLT3LG,CCL5,IKBKG
GO:0050793	regulation of developmental process	71	2648	0.49	3.72e-17	9606.ENSP00000009530,9606.ENSP00000011653,9606.ENSP00000162749,9606.ENSP00000216797,9606.ENSP00000221930,9606.ENSP00000223095,9606.ENSP00000225698,9606.ENSP00000225831,9606.ENSP00000243077,9606.ENSP00000245414,9606.ENSP00000245907,9606.ENSP00000260010,9606.ENSP00000261799,9606.ENSP00000262101,9606.ENSP00000264657,9606.ENSP00000264832,9606.ENSP00000269305,9606.ENSP00000271324,9606.ENSP00000279488,…	CD74,CD4,TNFRSF1A,NFKBIA,TGFB1,SERPINE1,C1QBP,CCL2,LRP1,IRF1,C3,TLR2,PDGFRB,MSR1,STAT3,ICAM1,TP53,CD53,DUSP6,THY1,BAX,ITGA5,CCR1,IL15,STAT6,AXL,C3AR1,COL3A1,CEBPB,FOS,CMKLR1,STAT2,RORC,JAK1,TNFSF13,ANP32B,FYN,FN1,CASP8,PSMB10,TFRC,STAT1,CD40,TLR4,KLF4,PSMB9,PSMB8,TNFRSF1B,ANXA1,CYBB,ISG15,IL6ST,JAK2,NFATC2,IRF7,ITGB2,BCL6,CDKN1A,IFITM1,CXCR4,NFATC4,HLA-B,INPP5D,PTPRC,HLA-G,MME,IKBKB,HCK,ITGB3,FLT…
GO:0045785	positive regulation of cell adhesion	31	423	0.93	4.62e-17	9606.ENSP00000009530,9606.ENSP00000011653,9606.ENSP00000225698,9606.ENSP00000225831,9606.ENSP00000259607,9606.ENSP00000264832,9606.ENSP00000284240,9606.ENSP00000293379,9606.ENSP00000294728,9606.ENSP00000296545,9606.ENSP00000320084,9606.ENSP00000343204,9606.ENSP00000346671,9606.ENSP00000346839,9606.ENSP00000353224,9606.ENSP00000353731,9606.ENSP00000355361,9606.ENSP00000359612,9606.ENSP00000365817,…	CD74,CD4,C1QBP,CCL2,CCL21,ICAM1,THY1,ITGA5,VCAM1,IL15,CD276,JAK1,FYN,FN1,TFRC,DPP4,CD47,BCL10,HLA-E,ANXA1,IL6ST,JAK2,HLA-A,ITGB2,BCL6,HLA-DPA1,HLA-DMB,HLA-DPB1,PTPRC,HLA-G,CCL5
GO:0002703	regulation of leukocyte mediated immunity	24	209	1.12	5.57e-17	9606.ENSP00000221930,9606.ENSP00000245907,9606.ENSP00000247668,9606.ENSP00000248244,9606.ENSP00000252593,9606.ENSP00000264832,9606.ENSP00000289902,9606.ENSP00000300134,9606.ENSP00000312367,9606.ENSP00000343505,9606.ENSP00000353224,9606.ENSP00000358335,9606.ENSP00000361359,9606.ENSP00000363089,9606.ENSP00000365435,9606.ENSP00000365817,9606.ENSP00000369213,9606.ENSP00000379873,9606.ENSP00000380948,…	TGFB1,C3,TRAF2,TICAM1,BST2,ICAM1,FCER1G,STAT6,CD84,TNFSF13,TFRC,MAP3K7,CD40,TLR4,TNFRSF1B,HLA-E,DDX58,HLA-A,ITGB2,BCL6,IL1R1,HLA-B,PTPRC,HLA-G
GO:0050870	positive regulation of T cell activation	24	209	1.12	5.57e-17	9606.ENSP00000009530,9606.ENSP00000011653,9606.ENSP00000225831,9606.ENSP00000259607,9606.ENSP00000284240,9606.ENSP00000294728,9606.ENSP00000296545,9606.ENSP00000320084,9606.ENSP00000346671,9606.ENSP00000353224,9606.ENSP00000353731,9606.ENSP00000355361,9606.ENSP00000359612,9606.ENSP00000365817,9606.ENSP00000366109,9606.ENSP00000370698,9606.ENSP00000379873,9606.ENSP00000384371,9606.ENSP00000393566,…	CD74,CD4,CCL2,CCL21,THY1,VCAM1,IL15,CD276,FYN,TFRC,DPP4,CD47,BCL10,HLA-E,ANXA1,IL6ST,HLA-A,BCL6,HLA-DPA1,HLA-DMB,HLA-DPB1,PTPRC,HLA-G,CCL5
GO:0019222	regulation of metabolic process	118	6948	0.29	6.05e-17	9606.ENSP00000009530,9606.ENSP00000011653,9606.ENSP00000162749,9606.ENSP00000216797,9606.ENSP00000221930,9606.ENSP00000223095,9606.ENSP00000225698,9606.ENSP00000225831,9606.ENSP00000227752,9606.ENSP00000228918,9606.ENSP00000228928,9606.ENSP00000241261,9606.ENSP00000243077,9606.ENSP00000245414,9606.ENSP00000245907,9606.ENSP00000247668,9606.ENSP00000248244,9606.ENSP00000252593,9606.ENSP00000259607,…	CD74,CD4,TNFRSF1A,NFKBIA,TGFB1,SERPINE1,C1QBP,CCL2,IL10RA,LTBR,OAS3,TNFSF10,LRP1,IRF1,C3,TRAF2,TICAM1,BST2,CCL21,TLR2,PDGFRB,MSR1,NLRC5,IFIH1,STAT3,ICAM1,TP53,ECSIT,SERPING1,DUSP6,THY1,FCER1G,BAX,ITGA5,MERTK,CCR1,IL15,STAT6,AXL,C3AR1,IL16,CD14,CEBPB,FOS,CMKLR1,CD84,STAT2,CD276,A2M,RORC,TNFSF13,ANP32B,ATG7,FYN,FN1,CASP8,PSMB10,PIK3CG,TFRC,STAT1,SBNO2,TLR1,CD47,IFNGR1,IFI16,MCL1,MAP3K7,NFKB2,BCL10,…
GO:0051607	defense response to virus	24	210	1.12	6.05e-17	9606.ENSP00000228928,9606.ENSP00000245414,9606.ENSP00000248244,9606.ENSP00000252593,9606.ENSP00000262510,9606.ENSP00000263642,9606.ENSP00000315768,9606.ENSP00000333657,9606.ENSP00000343957,9606.ENSP00000346437,9606.ENSP00000354394,9606.ENSP00000357113,9606.ENSP00000360869,9606.ENSP00000360891,9606.ENSP00000361359,9606.ENSP00000368699,9606.ENSP00000369213,9606.ENSP00000377218,9606.ENSP00000380697,…	OAS3,IRF1,TICAM1,BST2,NLRC5,IFIH1,STAT2,MX2,IFNAR2,ATG7,STAT1,IFI16,IFIT1,IFIT2,CD40,ISG15,DDX58,IRF2,IRF7,MX1,IFITM1,PTPRC,IFI27,IFITM2
GO:0050863	regulation of T cell activation	28	329	0.99	7.32e-17	9606.ENSP00000009530,9606.ENSP00000011653,9606.ENSP00000225831,9606.ENSP00000245414,9606.ENSP00000259607,9606.ENSP00000284240,9606.ENSP00000294728,9606.ENSP00000296545,9606.ENSP00000305422,9606.ENSP00000320084,9606.ENSP00000346671,9606.ENSP00000353224,9606.ENSP00000353731,9606.ENSP00000355361,9606.ENSP00000359612,9606.ENSP00000365435,9606.ENSP00000365817,9606.ENSP00000366109,9606.ENSP00000370698,…	CD74,CD4,CCL2,IRF1,CCL21,THY1,VCAM1,IL15,CEBPB,CD276,FYN,TFRC,DPP4,CD47,BCL10,TNFRSF1B,HLA-E,ANXA1,IL6ST,NFATC2,HLA-A,BCL6,HLA-DPA1,HLA-DMB,HLA-DPB1,PTPRC,HLA-G,CCL5
GO:0002224	toll-like receptor signaling pathway	19	100	1.34	7.37e-17	9606.ENSP00000216797,9606.ENSP00000248244,9606.ENSP00000260010,9606.ENSP00000304236,9606.ENSP00000351273,9606.ENSP00000354932,9606.ENSP00000357981,9606.ENSP00000358335,9606.ENSP00000359612,9606.ENSP00000361359,9606.ENSP00000363089,9606.ENSP00000376505,9606.ENSP00000380697,9606.ENSP00000380948,9606.ENSP00000382423,9606.ENSP00000401399,9606.ENSP00000430684,9606.ENSP00000454207,9606.ENSP00000483825	NFKBIA,TICAM1,TLR2,CD14,CASP8,TLR1,CTSS,MAP3K7,BCL10,CD40,TLR4,TANK,IRF7,ITGB2,MAP3K1,MYD88,IKBKB,TRAF3,IKBKG
GO:0060548	negative regulation of cell death	44	999	0.7	7.57e-17	9606.ENSP00000009530,9606.ENSP00000216797,9606.ENSP00000223095,9606.ENSP00000225831,9606.ENSP00000241261,9606.ENSP00000243077,9606.ENSP00000247668,9606.ENSP00000259607,9606.ENSP00000261799,9606.ENSP00000264657,9606.ENSP00000264832,9606.ENSP00000269305,9606.ENSP00000289902,9606.ENSP00000293288,9606.ENSP00000293379,9606.ENSP00000295408,9606.ENSP00000301178,9606.ENSP00000305422,9606.ENSP00000327025,…	CD74,NFKBIA,SERPINE1,CCL2,TNFSF10,LRP1,TRAF2,CCL21,PDGFRB,STAT3,ICAM1,TP53,FCER1G,BAX,ITGA5,MERTK,AXL,CEBPB,RORC,ATG7,FYN,FN1,CASP8,PIK3CG,TFRC,MCL1,BCL10,KLF4,TNFRSF1B,ANXA1,IL6ST,JAK2,IRF7,BCL6,CDKN1A,NFATC4,MYD88,CD200,IKBKB,HCK,FLT3LG,CCL5,TNFAIP3,IKBKG
GO:0019882	antigen processing and presentation	24	219	1.1	1.4e-16	9606.ENSP00000009530,9606.ENSP00000264832,9606.ENSP00000289902,9606.ENSP00000346206,9606.ENSP00000351314,9606.ENSP00000357981,9606.ENSP00000363976,9606.ENSP00000363993,9606.ENSP00000364016,9606.ENSP00000364034,9606.ENSP00000365402,9606.ENSP00000365817,9606.ENSP00000367851,9606.ENSP00000378786,9606.ENSP00000379873,9606.ENSP00000384886,9606.ENSP00000393566,9606.ENSP00000398890,9606.ENSP00000399168,…	CD74,ICAM1,FCER1G,TAP1,PSMB10,CTSS,HLA-DMA,PSMB9,PSMB8,TAP2,HLA-C,HLA-E,CYBB,HLA-DRA,HLA-A,IFI30,HLA-DPA1,HLA-DMB,HLA-B,TAPBP,HLA-DPB1,HLA-G,IKBKB,IKBKG
GO:0071216	cellular response to biotic stimulus	24	219	1.1	1.4e-16	9606.ENSP00000216797,9606.ENSP00000221930,9606.ENSP00000223095,9606.ENSP00000225831,9606.ENSP00000248244,9606.ENSP00000250092,9606.ENSP00000260010,9606.ENSP00000264832,9606.ENSP00000269305,9606.ENSP00000301178,9606.ENSP00000304236,9606.ENSP00000305422,9606.ENSP00000354733,9606.ENSP00000354932,9606.ENSP00000359612,9606.ENSP00000361359,9606.ENSP00000363089,9606.ENSP00000365435,9606.ENSP00000401399,…	NFKBIA,TGFB1,SERPINE1,CCL2,TICAM1,CD68,TLR2,ICAM1,TP53,AXL,CD14,CEBPB,SBNO2,TLR1,BCL10,CD40,TLR4,TNFRSF1B,MYD88,CASP1,HCK,MRC1,CCL5,TNFAIP3
GO:0071219	cellular response to molecule of bacterial origin	23	195	1.13	1.72e-16	9606.ENSP00000216797,9606.ENSP00000221930,9606.ENSP00000223095,9606.ENSP00000225831,9606.ENSP00000248244,9606.ENSP00000250092,9606.ENSP00000260010,9606.ENSP00000264832,9606.ENSP00000301178,9606.ENSP00000304236,9606.ENSP00000305422,9606.ENSP00000354733,9606.ENSP00000354932,9606.ENSP00000359612,9606.ENSP00000361359,9606.ENSP00000363089,9606.ENSP00000365435,9606.ENSP00000401399,9606.ENSP00000433138,…	NFKBIA,TGFB1,SERPINE1,CCL2,TICAM1,CD68,TLR2,ICAM1,AXL,CD14,CEBPB,SBNO2,TLR1,BCL10,CD40,TLR4,TNFRSF1B,MYD88,CASP1,HCK,MRC1,CCL5,TNFAIP3
GO:0002429	immune response-activating cell surface receptor signaling pathway	27	311	1	1.95e-16	9606.ENSP00000011653,9606.ENSP00000271450,9606.ENSP00000284240,9606.ENSP00000289902,9606.ENSP00000293288,9606.ENSP00000302079,9606.ENSP00000311733,9606.ENSP00000320084,9606.ENSP00000346671,9606.ENSP00000351314,9606.ENSP00000356946,9606.ENSP00000358335,9606.ENSP00000359612,9606.ENSP00000363993,9606.ENSP00000364016,9606.ENSP00000366563,9606.ENSP00000378786,9606.ENSP00000379330,9606.ENSP00000379873,…	CD4,FCGR2A,THY1,FCER1G,BAX,C3AR1,CMKLR1,CD276,FYN,PSMB10,FCGR3A,MAP3K7,BCL10,PSMB9,PSMB8,PIK3CD,HLA-DRA,NFATC2,HLA-A,HLA-DPA1,INPP5D,HLA-DPB1,PTPRC,ICAM2,IKBKB,HCK,IKBKG
GO:0002699	positive regulation of immune effector process	24	223	1.09	1.95e-16	9606.ENSP00000009530,9606.ENSP00000221930,9606.ENSP00000245907,9606.ENSP00000247668,9606.ENSP00000248244,9606.ENSP00000289902,9606.ENSP00000300134,9606.ENSP00000312367,9606.ENSP00000343505,9606.ENSP00000353224,9606.ENSP00000358335,9606.ENSP00000359612,9606.ENSP00000361359,9606.ENSP00000363089,9606.ENSP00000365817,9606.ENSP00000366109,9606.ENSP00000369213,9606.ENSP00000379873,9606.ENSP00000380948,…	CD74,TGFB1,C3,TRAF2,TICAM1,FCER1G,STAT6,CD84,TNFSF13,TFRC,MAP3K7,BCL10,CD40,TLR4,HLA-E,ANXA1,DDX58,HLA-A,ITGB2,IL1R1,HLA-DMB,HLA-B,PTPRC,HLA-G
GO:0010646	regulation of cell communication	81	3514	0.42	1.95e-16	9606.ENSP00000009530,9606.ENSP00000011653,9606.ENSP00000162749,9606.ENSP00000216797,9606.ENSP00000221930,9606.ENSP00000223095,9606.ENSP00000225698,9606.ENSP00000225831,9606.ENSP00000227752,9606.ENSP00000228918,9606.ENSP00000241261,9606.ENSP00000243077,9606.ENSP00000245414,9606.ENSP00000245907,9606.ENSP00000247668,9606.ENSP00000248244,9606.ENSP00000252593,9606.ENSP00000259607,9606.ENSP00000260010,…	CD74,CD4,TNFRSF1A,NFKBIA,TGFB1,SERPINE1,C1QBP,CCL2,IL10RA,LTBR,TNFSF10,LRP1,IRF1,C3,TRAF2,TICAM1,BST2,CCL21,TLR2,PDGFRB,NLRC5,STAT3,ICAM1,TP53,DUSP6,THY1,BAX,ITGA5,CCR1,IL15,AXL,CD14,COL3A1,CMKLR1,A2M,JAK1,IFNAR2,FYN,FN1,CASP8,PSMB10,PIK3CG,TFRC,DPP4,STAT1,TLR1,CD47,IFNGR1,MCL1,MAP3K7,BCL10,CD40,CCND3,TLR4,KLF4,PSMB9,PSMB8,ANXA1,PIK3CD,IL6ST,JAK2,TANK,IRF7,MAP3K1,BCL6,IL1R1,CXCR4,NFATC4,MYD88,INP…
GO:0002700	regulation of production of molecular mediator of immune response	21	152	1.2	3.06e-16	9606.ENSP00000009530,9606.ENSP00000221930,9606.ENSP00000247668,9606.ENSP00000248244,9606.ENSP00000252593,9606.ENSP00000289902,9606.ENSP00000300134,9606.ENSP00000343505,9606.ENSP00000353224,9606.ENSP00000358335,9606.ENSP00000359612,9606.ENSP00000361359,9606.ENSP00000363089,9606.ENSP00000365435,9606.ENSP00000365817,9606.ENSP00000369213,9606.ENSP00000379873,9606.ENSP00000384371,9606.ENSP00000386380,…	CD74,TGFB1,TRAF2,TICAM1,BST2,FCER1G,STAT6,TNFSF13,TFRC,MAP3K7,BCL10,CD40,TLR4,TNFRSF1B,HLA-E,DDX58,HLA-A,BCL6,IL1R1,PTPRC,HLA-G
GO:0050727	regulation of inflammatory response	28	351	0.96	3.23e-16	9606.ENSP00000162749,9606.ENSP00000216797,9606.ENSP00000223095,9606.ENSP00000245907,9606.ENSP00000248244,9606.ENSP00000260010,9606.ENSP00000264657,9606.ENSP00000289902,9606.ENSP00000296545,9606.ENSP00000302935,9606.ENSP00000305422,9606.ENSP00000352121,9606.ENSP00000354733,9606.ENSP00000355361,9606.ENSP00000363089,9606.ENSP00000363804,9606.ENSP00000365817,9606.ENSP00000366109,9606.ENSP00000370698,…	TNFRSF1A,NFKBIA,SERPINE1,C3,TICAM1,TLR2,STAT3,FCER1G,IL15,IL16,CEBPB,PIK3CG,SBNO2,CD47,TLR4,KLF4,HLA-E,ANXA1,IL6ST,JAK2,BCL6,IL1R1,MYD88,PTPRC,CASP1,HCK,CCL5,TNFAIP3
GO:0023051	regulation of signaling	81	3553	0.42	3.65e-16	9606.ENSP00000009530,9606.ENSP00000011653,9606.ENSP00000162749,9606.ENSP00000216797,9606.ENSP00000221930,9606.ENSP00000223095,9606.ENSP00000225698,9606.ENSP00000225831,9606.ENSP00000227752,9606.ENSP00000228918,9606.ENSP00000241261,9606.ENSP00000243077,9606.ENSP00000245414,9606.ENSP00000245907,9606.ENSP00000247668,9606.ENSP00000248244,9606.ENSP00000252593,9606.ENSP00000259607,9606.ENSP00000260010,…	CD74,CD4,TNFRSF1A,NFKBIA,TGFB1,SERPINE1,C1QBP,CCL2,IL10RA,LTBR,TNFSF10,LRP1,IRF1,C3,TRAF2,TICAM1,BST2,CCL21,TLR2,PDGFRB,NLRC5,STAT3,ICAM1,TP53,DUSP6,THY1,BAX,ITGA5,CCR1,IL15,AXL,CD14,COL3A1,CMKLR1,A2M,JAK1,IFNAR2,FYN,FN1,CASP8,PSMB10,PIK3CG,TFRC,DPP4,STAT1,TLR1,CD47,IFNGR1,MCL1,MAP3K7,BCL10,CD40,CCND3,TLR4,KLF4,PSMB9,PSMB8,ANXA1,PIK3CD,IL6ST,JAK2,TANK,IRF7,MAP3K1,BCL6,IL1R1,CXCR4,NFATC4,MYD88,INP…
GO:0002274	myeloid leukocyte activation	34	585	0.83	5.19e-16	9606.ENSP00000228918,9606.ENSP00000242786,9606.ENSP00000245907,9606.ENSP00000248244,9606.ENSP00000250092,9606.ENSP00000252593,9606.ENSP00000260010,9606.ENSP00000271324,9606.ENSP00000271450,9606.ENSP00000289902,9606.ENSP00000296545,9606.ENSP00000302079,9606.ENSP00000304236,9606.ENSP00000346437,9606.ENSP00000349252,9606.ENSP00000352121,9606.ENSP00000354733,9606.ENSP00000354932,9606.ENSP00000355361,…	LTBR,CD97,C3,TICAM1,CD68,BST2,TLR2,CD53,FCGR2A,FCER1G,IL15,C3AR1,CD14,ATG7,ITGAL,PIK3CG,SBNO2,TLR1,CD47,IFNGR1,CTSS,TLR4,C1QA,HLA-C,TNFRSF1B,PIK3CD,CYBB,JAK2,ITGB2,HLA-B,PTPRC,MME,PECAM1,CCL5
GO:0051094	positive regulation of developmental process	50	1389	0.62	5.39e-16	9606.ENSP00000009530,9606.ENSP00000011653,9606.ENSP00000162749,9606.ENSP00000221930,9606.ENSP00000223095,9606.ENSP00000225698,9606.ENSP00000243077,9606.ENSP00000245907,9606.ENSP00000260010,9606.ENSP00000261799,9606.ENSP00000262101,9606.ENSP00000264657,9606.ENSP00000269305,9606.ENSP00000271324,9606.ENSP00000293288,9606.ENSP00000293379,9606.ENSP00000296140,9606.ENSP00000296545,9606.ENSP00000300134,…	CD74,CD4,TNFRSF1A,TGFB1,SERPINE1,C1QBP,LRP1,C3,TLR2,PDGFRB,MSR1,STAT3,TP53,CD53,BAX,ITGA5,CCR1,IL15,STAT6,AXL,C3AR1,CEBPB,FOS,CMKLR1,JAK1,TNFSF13,FYN,FN1,CASP8,TFRC,STAT1,CD40,KLF4,TNFRSF1B,ANXA1,CYBB,ISG15,IL6ST,JAK2,NFATC2,ITGB2,BCL6,IFITM1,CXCR4,INPP5D,PTPRC,HLA-G,MME,FLT3LG,TNFAIP3
GO:0033993	response to lipid	40	858	0.73	5.77e-16	9606.ENSP00000011653,9606.ENSP00000216797,9606.ENSP00000221930,9606.ENSP00000223095,9606.ENSP00000225831,9606.ENSP00000227752,9606.ENSP00000248244,9606.ENSP00000250092,9606.ENSP00000259607,9606.ENSP00000260010,9606.ENSP00000261799,9606.ENSP00000264657,9606.ENSP00000264832,9606.ENSP00000270139,9606.ENSP00000296545,9606.ENSP00000301178,9606.ENSP00000304236,9606.ENSP00000305422,9606.ENSP00000306245,…	CD4,NFKBIA,TGFB1,SERPINE1,CCL2,IL10RA,TICAM1,CD68,CCL21,TLR2,PDGFRB,STAT3,ICAM1,IFNAR1,IL15,AXL,CD14,CEBPB,FOS,RORC,CASP8,SBNO2,NFKB2,BCL10,CD40,TLR4,KLF4,TNFRSF1B,ANXA1,CYBB,JAK2,CSF2RB,CDKN1A,NFATC4,MYD88,CASP1,HCK,MRC1,CCL5,TNFAIP3
GO:0002263	cell activation involved in immune response	35	630	0.81	5.81e-16	9606.ENSP00000009530,9606.ENSP00000242786,9606.ENSP00000243077,9606.ENSP00000245907,9606.ENSP00000248244,9606.ENSP00000250092,9606.ENSP00000252593,9606.ENSP00000260010,9606.ENSP00000264657,9606.ENSP00000264832,9606.ENSP00000269305,9606.ENSP00000271324,9606.ENSP00000271450,9606.ENSP00000289902,9606.ENSP00000300134,9606.ENSP00000302079,9606.ENSP00000304236,9606.ENSP00000327025,9606.ENSP00000346437,…	CD74,CD97,LRP1,C3,TICAM1,CD68,BST2,TLR2,STAT3,ICAM1,TP53,CD53,FCGR2A,FCER1G,STAT6,C3AR1,CD14,RORC,ATG7,ITGAL,PIK3CG,SBNO2,CD47,CTSS,TLR4,HLA-C,TNFRSF1B,PIK3CD,CYBB,ITGB2,LCP1,HLA-B,PTPRC,MME,PECAM1
GO:0032270	positive regulation of cellular protein metabolic process	54	1635	0.58	6.31e-16	9606.ENSP00000009530,9606.ENSP00000011653,9606.ENSP00000162749,9606.ENSP00000216797,9606.ENSP00000221930,9606.ENSP00000225698,9606.ENSP00000225831,9606.ENSP00000228918,9606.ENSP00000241261,9606.ENSP00000243077,9606.ENSP00000245907,9606.ENSP00000247668,9606.ENSP00000248244,9606.ENSP00000259607,9606.ENSP00000261799,9606.ENSP00000264657,9606.ENSP00000264832,9606.ENSP00000269305,9606.ENSP00000279488,…	CD74,CD4,TNFRSF1A,NFKBIA,TGFB1,C1QBP,CCL2,LTBR,TNFSF10,LRP1,C3,TRAF2,TICAM1,CCL21,PDGFRB,STAT3,ICAM1,TP53,DUSP6,BAX,ITGA5,CCR1,IL15,ANP32B,ATG7,FYN,FN1,CASP8,PIK3CG,TFRC,IFI16,MAP3K7,BCL10,CD40,CCND3,TLR4,KLF4,TNFRSF1B,IL6ST,JAK2,TANK,MAP3K1,BCL6,CDKN1A,CXCR4,PTPRC,CASP1,ITGB3,TRAF3,PECAM1,FLT3LG,CCL5,TNFAIP3,IKBKG
GO:0010468	regulation of gene expression	95	4813	0.36	6.35e-16	9606.ENSP00000009530,9606.ENSP00000011653,9606.ENSP00000162749,9606.ENSP00000216797,9606.ENSP00000221930,9606.ENSP00000223095,9606.ENSP00000225698,9606.ENSP00000243077,9606.ENSP00000245414,9606.ENSP00000245907,9606.ENSP00000247668,9606.ENSP00000248244,9606.ENSP00000252593,9606.ENSP00000260010,9606.ENSP00000262101,9606.ENSP00000262510,9606.ENSP00000263642,9606.ENSP00000264657,9606.ENSP00000264832,…	CD74,CD4,TNFRSF1A,NFKBIA,TGFB1,SERPINE1,C1QBP,LRP1,IRF1,C3,TRAF2,TICAM1,BST2,TLR2,MSR1,NLRC5,IFIH1,STAT3,ICAM1,TP53,FCER1G,MERTK,CCR1,IL15,STAT6,AXL,C3AR1,IL16,CD14,CEBPB,FOS,CMKLR1,CD84,STAT2,CD276,RORC,TNFSF13,FYN,FN1,CASP8,PSMB10,TFRC,STAT1,SBNO2,TLR1,CD47,IFNGR1,IFI16,MAP3K7,NFKB2,BCL10,CD40,CCND3,TLR4,KLF4,PSMB9,PSMB8,TNFRSF1B,HLA-E,ANXA1,PIK3CD,CYBB,ISG15,DDX58,RPS6,IL6ST,JAK2,IRF2,NFATC2,H…
GO:0071222	cellular response to lipopolysaccharide	22	185	1.14	7.76e-16	9606.ENSP00000216797,9606.ENSP00000221930,9606.ENSP00000223095,9606.ENSP00000225831,9606.ENSP00000248244,9606.ENSP00000250092,9606.ENSP00000260010,9606.ENSP00000264832,9606.ENSP00000301178,9606.ENSP00000304236,9606.ENSP00000305422,9606.ENSP00000354733,9606.ENSP00000359612,9606.ENSP00000361359,9606.ENSP00000363089,9606.ENSP00000365435,9606.ENSP00000401399,9606.ENSP00000433138,9606.ENSP00000444986,…	NFKBIA,TGFB1,SERPINE1,CCL2,TICAM1,CD68,TLR2,ICAM1,AXL,CD14,CEBPB,SBNO2,BCL10,CD40,TLR4,TNFRSF1B,MYD88,CASP1,HCK,MRC1,CCL5,TNFAIP3
GO:0051247	positive regulation of protein metabolic process	55	1715	0.57	9.74e-16	9606.ENSP00000009530,9606.ENSP00000011653,9606.ENSP00000162749,9606.ENSP00000216797,9606.ENSP00000221930,9606.ENSP00000225698,9606.ENSP00000225831,9606.ENSP00000228918,9606.ENSP00000241261,9606.ENSP00000243077,9606.ENSP00000245907,9606.ENSP00000247668,9606.ENSP00000248244,9606.ENSP00000259607,9606.ENSP00000261799,9606.ENSP00000264657,9606.ENSP00000264832,9606.ENSP00000269305,9606.ENSP00000279488,…	CD74,CD4,TNFRSF1A,NFKBIA,TGFB1,C1QBP,CCL2,LTBR,TNFSF10,LRP1,C3,TRAF2,TICAM1,CCL21,PDGFRB,STAT3,ICAM1,TP53,DUSP6,BAX,ITGA5,CCR1,IL15,ANP32B,ATG7,FYN,FN1,CASP8,PIK3CG,TFRC,IFNGR1,IFI16,MAP3K7,BCL10,CD40,CCND3,TLR4,KLF4,TNFRSF1B,IL6ST,JAK2,TANK,MAP3K1,BCL6,CDKN1A,CXCR4,PTPRC,CASP1,ITGB3,TRAF3,PECAM1,FLT3LG,CCL5,TNFAIP3,IKBKG
GO:0001959	regulation of cytokine-mediated signaling pathway	21	163	1.17	1.03e-15	9606.ENSP00000009530,9606.ENSP00000162749,9606.ENSP00000247668,9606.ENSP00000262510,9606.ENSP00000301178,9606.ENSP00000343204,9606.ENSP00000343957,9606.ENSP00000351273,9606.ENSP00000354394,9606.ENSP00000356713,9606.ENSP00000370698,9606.ENSP00000371067,9606.ENSP00000380697,9606.ENSP00000386380,9606.ENSP00000386884,9606.ENSP00000411355,9606.ENSP00000430684,9606.ENSP00000433138,9606.ENSP00000474412,…	CD74,TNFRSF1A,TRAF2,NLRC5,AXL,JAK1,IFNAR2,CASP8,STAT1,IFNGR1,IL6ST,JAK2,IRF7,IL1R1,CXCR4,PTPRC,IKBKB,CASP1,CCL5,TNFAIP3,IKBKG
GO:1902533	positive regulation of intracellular signal transduction	43	1041	0.68	1.72e-15	9606.ENSP00000009530,9606.ENSP00000011653,9606.ENSP00000162749,9606.ENSP00000221930,9606.ENSP00000225698,9606.ENSP00000225831,9606.ENSP00000228918,9606.ENSP00000241261,9606.ENSP00000243077,9606.ENSP00000247668,9606.ENSP00000248244,9606.ENSP00000252593,9606.ENSP00000259607,9606.ENSP00000260010,9606.ENSP00000261799,9606.ENSP00000264832,9606.ENSP00000269305,9606.ENSP00000279488,9606.ENSP00000293288,…	CD74,CD4,TNFRSF1A,TGFB1,C1QBP,CCL2,LTBR,TNFSF10,LRP1,TRAF2,TICAM1,BST2,CCL21,TLR2,PDGFRB,ICAM1,TP53,DUSP6,BAX,CCR1,AXL,CD14,COL3A1,FYN,CASP8,PIK3CG,TFRC,MCL1,MAP3K7,BCL10,CD40,TLR4,PIK3CD,JAK2,MAP3K1,CXCR4,MYD88,PTPRC,IKBKB,CASP1,TRAF3,CCL5,IKBKG
GO:0016192	vesicle-mediated transport	56	1805	0.55	1.83e-15	9606.ENSP00000221930,9606.ENSP00000223095,9606.ENSP00000227752,9606.ENSP00000242786,9606.ENSP00000243077,9606.ENSP00000245907,9606.ENSP00000250092,9606.ENSP00000252593,9606.ENSP00000260010,9606.ENSP00000262101,9606.ENSP00000264870,9606.ENSP00000268150,9606.ENSP00000271324,9606.ENSP00000271450,9606.ENSP00000278407,9606.ENSP00000289902,9606.ENSP00000293778,9606.ENSP00000295408,9606.ENSP00000296140,…	TGFB1,SERPINE1,IL10RA,CD97,LRP1,C3,CD68,BST2,TLR2,MSR1,F13A1,MFGE8,CD53,FCGR2A,SERPING1,FCER1G,CXCL16,MERTK,CCR1,AXL,C3AR1,CD14,APOL1,A2M,MX2,SIGLEC1,TAP1,ATG7,FYN,FN1,ITGAL,CD163,PIK3CG,TFRC,CD47,FCGR3A,CTSS,TLR4,TAP2,HLA-C,TNFRSF1B,ANXA1,PIK3CD,CYBB,ITGB2,MX1,HLA-B,MYD88,TAPBP,PTPRC,MME,HCK,ITGB3,MRC1,PECAM1,CCL5
GO:0031325	positive regulation of cellular metabolic process	78	3413	0.42	1.99e-15	9606.ENSP00000009530,9606.ENSP00000011653,9606.ENSP00000162749,9606.ENSP00000216797,9606.ENSP00000221930,9606.ENSP00000223095,9606.ENSP00000225698,9606.ENSP00000225831,9606.ENSP00000228918,9606.ENSP00000241261,9606.ENSP00000243077,9606.ENSP00000245414,9606.ENSP00000245907,9606.ENSP00000247668,9606.ENSP00000248244,9606.ENSP00000259607,9606.ENSP00000260010,9606.ENSP00000261799,9606.ENSP00000262510,…	CD74,CD4,TNFRSF1A,NFKBIA,TGFB1,SERPINE1,C1QBP,CCL2,LTBR,TNFSF10,LRP1,IRF1,C3,TRAF2,TICAM1,CCL21,TLR2,PDGFRB,NLRC5,STAT3,ICAM1,TP53,DUSP6,BAX,ITGA5,MERTK,CCR1,IL15,STAT6,AXL,CEBPB,FOS,STAT2,RORC,TNFSF13,ANP32B,ATG7,FYN,FN1,CASP8,PIK3CG,TFRC,STAT1,SBNO2,IFNGR1,IFI16,MAP3K7,NFKB2,BCL10,CD40,CCND3,TLR4,KLF4,TNFRSF1B,ANXA1,DDX58,IL6ST,JAK2,TANK,IRF2,NFATC2,IRF7,ITGB2,MAP3K1,BCL6,CDKN1A,CXCR4,NFATC4,PT…
GO:0043122	regulation of I-kappaB kinase/NF-kappaB signaling	24	251	1.04	2.1e-15	9606.ENSP00000009530,9606.ENSP00000011653,9606.ENSP00000162749,9606.ENSP00000228918,9606.ENSP00000241261,9606.ENSP00000247668,9606.ENSP00000248244,9606.ENSP00000252593,9606.ENSP00000259607,9606.ENSP00000346671,9606.ENSP00000351273,9606.ENSP00000353224,9606.ENSP00000354394,9606.ENSP00000358335,9606.ENSP00000359612,9606.ENSP00000361359,9606.ENSP00000363089,9606.ENSP00000376505,9606.ENSP00000401399,…	CD74,CD4,TNFRSF1A,LTBR,TNFSF10,TRAF2,TICAM1,BST2,CCL21,FYN,CASP8,TFRC,STAT1,MAP3K7,BCL10,CD40,TLR4,TANK,MYD88,IKBKB,CASP1,TRAF3,TNFAIP3,IKBKG
GO:1901700	response to oxygen-containing compound	52	1567	0.58	2.49e-15	9606.ENSP00000011653,9606.ENSP00000216797,9606.ENSP00000221930,9606.ENSP00000223095,9606.ENSP00000225831,9606.ENSP00000227752,9606.ENSP00000241261,9606.ENSP00000243077,9606.ENSP00000247668,9606.ENSP00000248244,9606.ENSP00000250092,9606.ENSP00000259607,9606.ENSP00000260010,9606.ENSP00000261799,9606.ENSP00000264657,9606.ENSP00000264832,9606.ENSP00000269305,9606.ENSP00000270139,9606.ENSP00000294728,…	CD4,NFKBIA,TGFB1,SERPINE1,CCL2,IL10RA,TNFSF10,LRP1,TRAF2,TICAM1,CD68,CCL21,TLR2,PDGFRB,STAT3,ICAM1,TP53,IFNAR1,VCAM1,IL15,STAT6,AXL,CD14,COL3A1,CEBPB,FOS,STAT2,RORC,ATG7,FYN,CASP8,PIK3CG,STAT1,SBNO2,NFKB2,BCL10,CD40,TLR4,KLF4,TNFRSF1B,ANXA1,CYBB,JAK2,CSF2RB,CDKN1A,NFATC4,MYD88,CASP1,HCK,MRC1,CCL5,TNFAIP3
GO:0002702	positive regulation of production of molecular mediator of immune response	18	105	1.3	2.67e-15	9606.ENSP00000009530,9606.ENSP00000221930,9606.ENSP00000247668,9606.ENSP00000248244,9606.ENSP00000289902,9606.ENSP00000300134,9606.ENSP00000343505,9606.ENSP00000353224,9606.ENSP00000358335,9606.ENSP00000359612,9606.ENSP00000361359,9606.ENSP00000363089,9606.ENSP00000365817,9606.ENSP00000369213,9606.ENSP00000379873,9606.ENSP00000386380,9606.ENSP00000411355,9606.ENSP00000412927	CD74,TGFB1,TRAF2,TICAM1,FCER1G,STAT6,TNFSF13,TFRC,MAP3K7,BCL10,CD40,TLR4,HLA-E,DDX58,HLA-A,IL1R1,PTPRC,HLA-G
GO:0002366	leukocyte activation involved in immune response	34	626	0.8	3.29e-15	9606.ENSP00000009530,9606.ENSP00000242786,9606.ENSP00000245907,9606.ENSP00000248244,9606.ENSP00000250092,9606.ENSP00000252593,9606.ENSP00000260010,9606.ENSP00000264657,9606.ENSP00000264832,9606.ENSP00000269305,9606.ENSP00000271324,9606.ENSP00000271450,9606.ENSP00000289902,9606.ENSP00000300134,9606.ENSP00000302079,9606.ENSP00000304236,9606.ENSP00000327025,9606.ENSP00000346437,9606.ENSP00000349252,…	CD74,CD97,C3,TICAM1,CD68,BST2,TLR2,STAT3,ICAM1,TP53,CD53,FCGR2A,FCER1G,STAT6,C3AR1,CD14,RORC,ATG7,ITGAL,PIK3CG,SBNO2,CD47,CTSS,TLR4,HLA-C,TNFRSF1B,PIK3CD,CYBB,ITGB2,LCP1,HLA-B,PTPRC,MME,PECAM1
GO:0002822	regulation of adaptive immune response based on somatic recombination of immune receptors built from immunoglobulin superfamily domains	20	150	1.19	3.35e-15	9606.ENSP00000011653,9606.ENSP00000221930,9606.ENSP00000245907,9606.ENSP00000247668,9606.ENSP00000289902,9606.ENSP00000300134,9606.ENSP00000343505,9606.ENSP00000353224,9606.ENSP00000358335,9606.ENSP00000361359,9606.ENSP00000365435,9606.ENSP00000365817,9606.ENSP00000366109,9606.ENSP00000379873,9606.ENSP00000384371,9606.ENSP00000386380,9606.ENSP00000399168,9606.ENSP00000411355,9606.ENSP00000412927,…	CD4,TGFB1,C3,TRAF2,FCER1G,STAT6,TNFSF13,TFRC,MAP3K7,CD40,TNFRSF1B,HLA-E,ANXA1,HLA-A,BCL6,IL1R1,HLA-B,PTPRC,HLA-G,TNFAIP3
GO:0042127	regulation of cell population proliferation	53	1642	0.57	3.41e-15	9606.ENSP00000009530,9606.ENSP00000011653,9606.ENSP00000216797,9606.ENSP00000221930,9606.ENSP00000225831,9606.ENSP00000245414,9606.ENSP00000248244,9606.ENSP00000252593,9606.ENSP00000260010,9606.ENSP00000261799,9606.ENSP00000264657,9606.ENSP00000269305,9606.ENSP00000293288,9606.ENSP00000294728,9606.ENSP00000296545,9606.ENSP00000300134,9606.ENSP00000305422,9606.ENSP00000309376,9606.ENSP00000315768,…	CD74,CD4,NFKBIA,TGFB1,CCL2,IRF1,TICAM1,BST2,TLR2,PDGFRB,STAT3,TP53,BAX,VCAM1,IL15,STAT6,CEBPB,CD164,STAT2,CD276,TNFSF13,FYN,FN1,TFRC,DPP4,STAT1,CD47,CD40,CCND3,TLR4,KLF4,TNFRSF1B,HLA-E,ANXA1,IL6ST,JAK2,NFATC2,HLA-A,BCL6,CDKN1A,IFITM1,HLA-DPA1,HLA-DMB,INPP5D,HLA-DPB1,PTPRC,HLA-G,CD200,HCK,ITGB3,FLT3LG,CCL5,TNFAIP3
GO:0010942	positive regulation of cell death	36	719	0.76	3.79e-15	9606.ENSP00000162749,9606.ENSP00000225698,9606.ENSP00000225831,9606.ENSP00000228918,9606.ENSP00000241261,9606.ENSP00000243077,9606.ENSP00000247668,9606.ENSP00000261799,9606.ENSP00000269305,9606.ENSP00000279488,9606.ENSP00000293288,9606.ENSP00000306245,9606.ENSP00000345848,9606.ENSP00000346437,9606.ENSP00000346671,9606.ENSP00000351273,9606.ENSP00000358022,9606.ENSP00000359612,9606.ENSP00000360891,…	TNFRSF1A,C1QBP,CCL2,LTBR,TNFSF10,LRP1,TRAF2,PDGFRB,TP53,DUSP6,BAX,FOS,ANP32B,ATG7,FYN,CASP8,MCL1,BCL10,IFIT2,CD40,TLR4,C1QA,TNFRSF1B,ANXA1,PIK3CD,RPS6,JAK2,ITGB2,BCL6,CDKN1A,NFATC4,INPP5D,PTPRC,HLA-G,CASP1,CCL5
GO:0051049	regulation of transport	55	1776	0.55	4.05e-15	9606.ENSP00000009530,9606.ENSP00000011653,9606.ENSP00000162749,9606.ENSP00000216797,9606.ENSP00000221930,9606.ENSP00000223095,9606.ENSP00000225831,9606.ENSP00000243077,9606.ENSP00000245907,9606.ENSP00000247668,9606.ENSP00000252593,9606.ENSP00000259607,9606.ENSP00000260010,9606.ENSP00000261799,9606.ENSP00000264832,9606.ENSP00000268150,9606.ENSP00000269305,9606.ENSP00000284240,9606.ENSP00000289902,…	CD74,CD4,TNFRSF1A,NFKBIA,TGFB1,SERPINE1,CCL2,LRP1,C3,TRAF2,BST2,CCL21,TLR2,PDGFRB,ICAM1,MFGE8,TP53,THY1,FCER1G,BAX,MERTK,CCR1,IL15,AXL,IL16,CD14,CEBPB,CD84,MX2,ANP32B,FYN,CASP8,PIK3CG,DPP4,CD47,CTSS,CD40,TLR4,IL2RG,TNFRSF1B,HLA-E,ANXA1,CYBB,JAK2,IL15RA,ITGB2,LCP1,CXCR4,PTPRC,CD200,HCK,ITGB3,CCL5,ABCB1,IFI27
GO:0051173	positive regulation of nitrogen compound metabolic process	75	3239	0.43	5.92e-15	9606.ENSP00000009530,9606.ENSP00000011653,9606.ENSP00000162749,9606.ENSP00000216797,9606.ENSP00000221930,9606.ENSP00000223095,9606.ENSP00000225698,9606.ENSP00000225831,9606.ENSP00000228918,9606.ENSP00000241261,9606.ENSP00000243077,9606.ENSP00000245414,9606.ENSP00000245907,9606.ENSP00000247668,9606.ENSP00000248244,9606.ENSP00000259607,9606.ENSP00000260010,9606.ENSP00000261799,9606.ENSP00000262510,…	CD74,CD4,TNFRSF1A,NFKBIA,TGFB1,SERPINE1,C1QBP,CCL2,LTBR,TNFSF10,LRP1,IRF1,C3,TRAF2,TICAM1,CCL21,TLR2,PDGFRB,NLRC5,STAT3,ICAM1,TP53,DUSP6,BAX,ITGA5,CCR1,IL15,STAT6,CEBPB,FOS,STAT2,RORC,TNFSF13,ANP32B,ATG7,FYN,FN1,CASP8,PIK3CG,TFRC,STAT1,SBNO2,IFNGR1,IFI16,MAP3K7,NFKB2,BCL10,CD40,CCND3,TLR4,KLF4,TNFRSF1B,DDX58,IL6ST,JAK2,TANK,IRF2,NFATC2,IRF7,ITGB2,MAP3K1,BCL6,CDKN1A,CXCR4,NFATC4,PTPRC,IKBKB,CASP1,…
GO:0043066	negative regulation of apoptotic process	39	893	0.7	1.18e-14	9606.ENSP00000009530,9606.ENSP00000216797,9606.ENSP00000223095,9606.ENSP00000225831,9606.ENSP00000241261,9606.ENSP00000243077,9606.ENSP00000247668,9606.ENSP00000259607,9606.ENSP00000261799,9606.ENSP00000264832,9606.ENSP00000269305,9606.ENSP00000289902,9606.ENSP00000293288,9606.ENSP00000293379,9606.ENSP00000295408,9606.ENSP00000301178,9606.ENSP00000305422,9606.ENSP00000327025,9606.ENSP00000346671,…	CD74,NFKBIA,SERPINE1,CCL2,TNFSF10,LRP1,TRAF2,CCL21,PDGFRB,ICAM1,TP53,FCER1G,BAX,ITGA5,MERTK,AXL,CEBPB,RORC,FYN,FN1,CASP8,PIK3CG,TFRC,MCL1,BCL10,KLF4,ANXA1,IL6ST,JAK2,IRF7,BCL6,CDKN1A,NFATC4,MYD88,IKBKB,HCK,FLT3LG,CCL5,TNFAIP3
GO:0042590	antigen processing and presentation of exogenous peptide antigen via MHC class I	16	80	1.36	1.88e-14	9606.ENSP00000289902,9606.ENSP00000346206,9606.ENSP00000351314,9606.ENSP00000363993,9606.ENSP00000364016,9606.ENSP00000364034,9606.ENSP00000365402,9606.ENSP00000365817,9606.ENSP00000367851,9606.ENSP00000379873,9606.ENSP00000384886,9606.ENSP00000399168,9606.ENSP00000404833,9606.ENSP00000412927,9606.ENSP00000430684,9606.ENSP00000483825	FCER1G,TAP1,PSMB10,PSMB9,PSMB8,TAP2,HLA-C,HLA-E,CYBB,HLA-A,IFI30,HLA-B,TAPBP,HLA-G,IKBKB,IKBKG
GO:0002821	positive regulation of adaptive immune response	17	106	1.27	5.4e-14	9606.ENSP00000011653,9606.ENSP00000221930,9606.ENSP00000245907,9606.ENSP00000247668,9606.ENSP00000289902,9606.ENSP00000300134,9606.ENSP00000343505,9606.ENSP00000353224,9606.ENSP00000358335,9606.ENSP00000361359,9606.ENSP00000365817,9606.ENSP00000366109,9606.ENSP00000370698,9606.ENSP00000379873,9606.ENSP00000386380,9606.ENSP00000399168,9606.ENSP00000411355	CD4,TGFB1,C3,TRAF2,FCER1G,STAT6,TNFSF13,TFRC,MAP3K7,CD40,HLA-E,ANXA1,IL6ST,HLA-A,IL1R1,HLA-B,PTPRC
GO:2000026	regulation of multicellular organismal development	58	2096	0.5	5.85e-14	9606.ENSP00000009530,9606.ENSP00000011653,9606.ENSP00000162749,9606.ENSP00000216797,9606.ENSP00000221930,9606.ENSP00000223095,9606.ENSP00000225698,9606.ENSP00000243077,9606.ENSP00000245414,9606.ENSP00000245907,9606.ENSP00000260010,9606.ENSP00000261799,9606.ENSP00000264657,9606.ENSP00000269305,9606.ENSP00000279488,9606.ENSP00000284240,9606.ENSP00000293288,9606.ENSP00000293379,9606.ENSP00000296140,…	CD74,CD4,TNFRSF1A,NFKBIA,TGFB1,SERPINE1,C1QBP,LRP1,IRF1,C3,TLR2,PDGFRB,STAT3,TP53,DUSP6,THY1,BAX,ITGA5,CCR1,IL15,STAT6,AXL,C3AR1,COL3A1,CEBPB,FOS,JAK1,TNFSF13,FYN,FN1,CASP8,PSMB10,TFRC,STAT1,CD40,TLR4,KLF4,PSMB9,PSMB8,TNFRSF1B,ANXA1,CYBB,ISG15,IL6ST,NFATC2,IRF7,ITGB2,BCL6,CXCR4,NFATC4,HLA-B,INPP5D,PTPRC,HLA-G,MME,IKBKB,FLT3LG,TNFAIP3
GO:0002520	immune system development	33	652	0.77	6.81e-14	9606.ENSP00000009530,9606.ENSP00000011653,9606.ENSP00000221930,9606.ENSP00000228918,9606.ENSP00000245414,9606.ENSP00000260010,9606.ENSP00000261799,9606.ENSP00000264657,9606.ENSP00000269305,9606.ENSP00000289902,9606.ENSP00000293288,9606.ENSP00000294728,9606.ENSP00000295408,9606.ENSP00000296545,9606.ENSP00000300134,9606.ENSP00000301178,9606.ENSP00000309376,9606.ENSP00000327025,9606.ENSP00000351273,…	CD74,CD4,TGFB1,LTBR,IRF1,TLR2,PDGFRB,STAT3,TP53,FCER1G,BAX,VCAM1,MERTK,IL15,STAT6,AXL,CD164,RORC,CASP8,TFRC,SBNO2,IFI16,NFKB2,KLF4,HLA-E,ANXA1,PIK3CD,JAK2,BCL6,PTPRC,HLA-G,FLT3LG,TNFAIP3
GO:1901701	cellular response to oxygen-containing compound	41	1055	0.65	7.78e-14	9606.ENSP00000216797,9606.ENSP00000221930,9606.ENSP00000223095,9606.ENSP00000225831,9606.ENSP00000243077,9606.ENSP00000247668,9606.ENSP00000248244,9606.ENSP00000250092,9606.ENSP00000260010,9606.ENSP00000261799,9606.ENSP00000264657,9606.ENSP00000264832,9606.ENSP00000269305,9606.ENSP00000294728,9606.ENSP00000296545,9606.ENSP00000300134,9606.ENSP00000301178,9606.ENSP00000304236,9606.ENSP00000304408,…	NFKBIA,TGFB1,SERPINE1,CCL2,LRP1,TRAF2,TICAM1,CD68,TLR2,PDGFRB,STAT3,ICAM1,TP53,VCAM1,IL15,STAT6,AXL,CD14,COL3A1,CEBPB,FOS,RORC,FYN,PIK3CG,STAT1,SBNO2,BCL10,CD40,TLR4,KLF4,TNFRSF1B,ANXA1,CYBB,JAK2,NFATC4,MYD88,CASP1,HCK,MRC1,CCL5,TNFAIP3
GO:0002718	regulation of cytokine production involved in immune response	16	89	1.32	8.02e-14	9606.ENSP00000009530,9606.ENSP00000221930,9606.ENSP00000247668,9606.ENSP00000248244,9606.ENSP00000252593,9606.ENSP00000289902,9606.ENSP00000358335,9606.ENSP00000359612,9606.ENSP00000363089,9606.ENSP00000365435,9606.ENSP00000365817,9606.ENSP00000369213,9606.ENSP00000379873,9606.ENSP00000384371,9606.ENSP00000386380,9606.ENSP00000412927	CD74,TGFB1,TRAF2,TICAM1,BST2,FCER1G,MAP3K7,BCL10,TLR4,TNFRSF1B,HLA-E,DDX58,HLA-A,BCL6,IL1R1,HLA-G
GO:0034612	response to tumor necrosis factor	23	269	0.99	8.77e-14	9606.ENSP00000162749,9606.ENSP00000216797,9606.ENSP00000225831,9606.ENSP00000228918,9606.ENSP00000247668,9606.ENSP00000259607,9606.ENSP00000264832,9606.ENSP00000269305,9606.ENSP00000293778,9606.ENSP00000304236,9606.ENSP00000343505,9606.ENSP00000351273,9606.ENSP00000351314,9606.ENSP00000354394,9606.ENSP00000361359,9606.ENSP00000363993,9606.ENSP00000364016,9606.ENSP00000365435,9606.ENSP00000371067,…	TNFRSF1A,NFKBIA,CCL2,LTBR,TRAF2,CCL21,ICAM1,TP53,CXCL16,CD14,TNFSF13,CASP8,PSMB10,STAT1,CD40,PSMB9,PSMB8,TNFRSF1B,JAK2,TANK,IKBKB,TRAF3,CCL5
GO:0009987	cellular process	167	15024	0.11	9.84e-14	9606.ENSP00000009530,9606.ENSP00000011653,9606.ENSP00000162749,9606.ENSP00000216797,9606.ENSP00000221930,9606.ENSP00000223095,9606.ENSP00000225698,9606.ENSP00000225831,9606.ENSP00000227752,9606.ENSP00000228918,9606.ENSP00000228928,9606.ENSP00000241261,9606.ENSP00000242786,9606.ENSP00000243077,9606.ENSP00000245414,9606.ENSP00000245907,9606.ENSP00000247668,9606.ENSP00000248244,9606.ENSP00000250092,…	CD74,CD4,TNFRSF1A,NFKBIA,TGFB1,SERPINE1,C1QBP,CCL2,IL10RA,LTBR,OAS3,TNFSF10,CD97,LRP1,IRF1,C3,TRAF2,TICAM1,CD68,BST2,CCL21,TLR2,PDGFRB,MSR1,NLRC5,ITGAE,IFIH1,CKLF,STAT3,ICAM1,F13A1,MFGE8,TP53,IFNAR1,ECSIT,CD53,FCGR2A,SERPING1,DUSP6,THY1,FCER1G,BAX,ITGA5,CXCL16,VCAM1,MERTK,CCR1,IL15,STAT6,AXL,C3AR1,IL16,CD14,COL3A1,CEBPB,FOS,CD164,CMKLR1,CD84,C1QB,STAT2,APOL1,CD276,C7,A2M,RORC,MX2,SIGLEC1,JAK1,TNF…
GO:0002705	positive regulation of leukocyte mediated immunity	18	137	1.18	1.6e-13	9606.ENSP00000221930,9606.ENSP00000245907,9606.ENSP00000247668,9606.ENSP00000248244,9606.ENSP00000289902,9606.ENSP00000300134,9606.ENSP00000343505,9606.ENSP00000353224,9606.ENSP00000358335,9606.ENSP00000361359,9606.ENSP00000365817,9606.ENSP00000369213,9606.ENSP00000379873,9606.ENSP00000380948,9606.ENSP00000386380,9606.ENSP00000399168,9606.ENSP00000411355,9606.ENSP00000412927	TGFB1,C3,TRAF2,TICAM1,FCER1G,STAT6,TNFSF13,TFRC,MAP3K7,CD40,HLA-E,DDX58,HLA-A,ITGB2,IL1R1,HLA-B,PTPRC,HLA-G
GO:1902531	regulation of intracellular signal transduction	53	1807	0.53	1.6e-13	9606.ENSP00000009530,9606.ENSP00000011653,9606.ENSP00000162749,9606.ENSP00000216797,9606.ENSP00000221930,9606.ENSP00000225698,9606.ENSP00000225831,9606.ENSP00000228918,9606.ENSP00000241261,9606.ENSP00000243077,9606.ENSP00000247668,9606.ENSP00000248244,9606.ENSP00000252593,9606.ENSP00000259607,9606.ENSP00000260010,9606.ENSP00000261799,9606.ENSP00000264832,9606.ENSP00000269305,9606.ENSP00000279488,…	CD74,CD4,TNFRSF1A,NFKBIA,TGFB1,C1QBP,CCL2,LTBR,TNFSF10,LRP1,TRAF2,TICAM1,BST2,CCL21,TLR2,PDGFRB,ICAM1,TP53,DUSP6,BAX,CCR1,AXL,CD14,COL3A1,CMKLR1,A2M,FYN,FN1,CASP8,PIK3CG,TFRC,STAT1,MCL1,MAP3K7,BCL10,CD40,TLR4,KLF4,PIK3CD,JAK2,TANK,MAP3K1,BCL6,CXCR4,MYD88,PTPRC,HLA-G,IKBKB,CASP1,TRAF3,CCL5,TNFAIP3,IKBKG
GO:0043123	positive regulation of I-kappaB kinase/NF-kappaB signaling	20	194	1.07	2.74e-13	9606.ENSP00000009530,9606.ENSP00000011653,9606.ENSP00000162749,9606.ENSP00000228918,9606.ENSP00000241261,9606.ENSP00000247668,9606.ENSP00000248244,9606.ENSP00000252593,9606.ENSP00000259607,9606.ENSP00000346671,9606.ENSP00000351273,9606.ENSP00000353224,9606.ENSP00000358335,9606.ENSP00000359612,9606.ENSP00000361359,9606.ENSP00000363089,9606.ENSP00000401399,9606.ENSP00000430684,9606.ENSP00000433138,…	CD74,CD4,TNFRSF1A,LTBR,TNFSF10,TRAF2,TICAM1,BST2,CCL21,FYN,CASP8,TFRC,MAP3K7,BCL10,CD40,TLR4,MYD88,IKBKB,CASP1,IKBKG
GO:0048585	negative regulation of response to stimulus	50	1636	0.55	2.74e-13	9606.ENSP00000009530,9606.ENSP00000162749,9606.ENSP00000216797,9606.ENSP00000221930,9606.ENSP00000223095,9606.ENSP00000225698,9606.ENSP00000225831,9606.ENSP00000241261,9606.ENSP00000243077,9606.ENSP00000247668,9606.ENSP00000248244,9606.ENSP00000252593,9606.ENSP00000262510,9606.ENSP00000264832,9606.ENSP00000269305,9606.ENSP00000278407,9606.ENSP00000279488,9606.ENSP00000284240,9606.ENSP00000293288,…	CD74,TNFRSF1A,NFKBIA,TGFB1,SERPINE1,C1QBP,CCL2,TNFSF10,LRP1,TRAF2,TICAM1,BST2,NLRC5,ICAM1,TP53,SERPING1,DUSP6,THY1,BAX,STAT6,CD14,COL3A1,CD84,A2M,ATG7,FYN,CASP8,PSMB10,DPP4,STAT1,CD47,IFI16,MCL1,TLR4,KLF4,PSMB9,PSMB8,HLA-E,ANXA1,IL6ST,TANK,HLA-A,BCL6,NFATC4,HLA-B,INPP5D,PTPRC,HLA-G,CCL5,TNFAIP3
[truncated: 789 more rows]

## Sheet: S6_Data_Figure_2A
Gene ID	Log2 fold change	std error (log2)	Lower confidence limit (log2)	Upper confidence limit (log2)	Linear fold change	Lower confidence limit (linear)	Upper confidence limit (linear)	P-value	BH.p.value	method	Gene.sets	probe.ID
[truncated: 375 more rows]

[truncated: 12 more sheets: S7_Data_Figure_2B, S8_Data_Figure_3A, S9_Data_Figure_3B, S10_Data_Figure_3C, S11_Data_Figure_3E, S12_Data_Figure_3F, S13 _Data_Figure_4A, S14_Data_Figure_4B, S15_Data_Supplemental_Figure_2, S16_Data_Supplemental_Figure_3A, S17_Data_Supplemental_Figure_3B, S18_Data_Supplemental_Figure_3C]
